# Supplementary material
Source: publisher site journal article supplement (https://www.dovepress.com/get_supplementary_file.php?f=223406-table-1.xlsx)
Supplement: Supplementary file 1 [file get_supplementary_file.php]

## Sheet: Sheet1
GO Terms	CGGA P-value	CGGA R-value	TCGA P-value	TCGA R-value	CGGA P-value	CGGA R-value	TCGA P-value	TCGA R-value	CGGA P-value	CGGA R-value	TCGA P-value	TCGA R-value	CGGA P-value	CGGA R-value	TCGA P-value	TCGA R-value
	Siglec-5	Siglec-5	Siglec-5	Siglec-5	Siglec-7	Siglec-7	Siglec-7	Siglec-7	Siglec-9	Siglec-9	Siglec-9	Siglec-9	Siglec-16	Siglec-16	Siglec-16	Siglec-16
GO_POSITIVE_REGULATION_OF_VIRAL_TRANSCRIPTION	0.122449	-0.0858502	5.52439e-06	-0.170903	0.0822262	-0.0965487	0.208386	-0.0476408	0.484303	-0.0389309	0.00111279	-0.123069	0.476629	0.0396171	0.352736	-0.0352013
GO_CARDIAC_CHAMBER_DEVELOPMENT	0.286537	-0.0592935	0.692157	-0.0150015	0.138577	-0.082335	0.000127102	-0.144438	0.102632	-0.0907022	0.0490336	-0.0744778	0.0006578	-0.188	0.00126518	-0.121698
GO_DNA_DEPENDENT_DNA_REPLICATION_MAINTENANCE_OF_FIDELITY	0.7578	-0.0171703	0.691261	0.0150474	0.328789	-0.054339	0.00260118	0.113732	0.438563	-0.0431145	0.0412154	0.0772341	0.922775	-0.00539798	0.538541	0.0233008
GO_CIRCADIAN_RHYTHM	0.647188	0.0254811	0.74907	-0.0121197	0.181023	0.0743811	1.73251e-06	-0.179732	0.799645	0.0141324	0.0307147	-0.0817366	0.0055803	-0.153414	1.08218e-05	-0.165572
GO_PHOSPHATIDYLSERINE_ACYL_CHAIN_REMODELING	7.58767e-06	0.245448	4.6097e-07	0.189313	1.69031e-07	0.285189	2.94135e-13	0.271293	3.00859e-09	0.321465	3.66983e-14	0.281114	1.67323e-07	0.285287	9.19069e-07	0.184382
GO_SPINAL_CORD_DEVELOPMENT	8.41108e-19	-0.464547	7.33133e-21	-0.344101	1.4474e-24	-0.52643	1.83306e-38	-0.463183	3.46721e-22	-0.502391	1.65823e-43	-0.490061	2.63748e-05	-0.230857	1.88286e-15	-0.294487
GO_PLATELET_DERIVED_GROWTH_FACTOR_RECEPTOR_SIGNALING_PATHWAY	0.00213292	0.169768	2.4872e-13	0.272099	2.0863e-05	0.233674	0.149328	0.054595	0.0121689	0.138935	2.30807e-06	0.177588	0.0137493	-0.136549	0.109649	-0.0605619
GO_CELLULAR_RESPONSE_TO_LIPOPROTEIN_PARTICLE_STIMULUS	1.39305e-24	0.526592	2.50872e-53	0.536389	1.55181e-42	0.663116	3.43983e-74	0.615782	2.84192e-33	0.600838	6.65098e-94	0.674435	3.04173e-09	0.321373	2.85996e-29	0.407008
GO_REGULATION_OF_NLRP3_INFLAMMASOME_COMPLEX_ASSEMBLY	5.74556e-08	0.295405	2.11243e-41	0.479131	1.01493e-14	0.411605	1.22959e-25	0.381496	5.9619e-12	0.369497	1.42459e-40	0.474717	0.00869157	0.145337	6.95068e-13	0.267116
GO_POSITIVE_REGULATION_OF_EPITHELIAL_CELL_DIFFERENTIATION	5.27178e-06	0.249546	0.135884	0.056462	0.00553497	0.153559	0.140862	0.0557549	3.3942e-05	0.227786	0.0632851	0.070284	0.0565311	0.105887	0.558466	-0.0221683
GO_POSITIVE_REGULATION_OF_KINASE_ACTIVITY	1.2748e-08	0.309025	2.74784e-30	0.413771	1.0459e-12	0.381602	1.39072e-12	0.263693	1.52714e-09	0.327117	2.70463e-30	0.413816	0.625082	0.0272058	0.000630264	0.12898
GO_NEGATIVE_REGULATION_OF_TRANSCRIPTION_FACTOR_IMPORT_INTO_NUCLEUS	0.608656	0.0285043	0.0214459	-0.0869862	0.104623	0.090183	1.06919e-10	-0.241041	0.81941	-0.0127125	7.43297e-08	-0.201769	0.0037514	-0.160347	1.78963e-07	-0.195872
GO_POTASSIUM_ION_TRANSPORT	2.00356e-06	-0.260103	4.71942e-14	-0.279948	7.39035e-08	-0.293057	1.69681e-24	-0.373007	3.20269e-09	-0.320938	2.59674e-26	-0.38641	1.38165e-05	-0.238544	1.22979e-17	-0.315655
GO_REGULATION_OF_T_CELL_RECEPTOR_SIGNALING_PATHWAY	9.20774e-31	0.581252	2.41596e-51	0.527589	1.65901e-42	0.662942	9.69954e-71	0.604076	1.72402e-43	0.668779	4.28519e-92	0.669566	2.00526e-12	0.377134	1.57796e-28	0.401978
GO_CARDIAC_MUSCLE_ADAPTATION	1.35339e-15	-0.423761	4.00805e-17	-0.310837	1.85386e-13	-0.39316	1.17094e-38	-0.464266	2.20768e-11	-0.360047	1.44594e-36	-0.452421	0.000159405	-0.207958	2.37813e-10	-0.236613
GO_NEGATIVE_REGULATION_OF_EPITHELIAL_CELL_PROLIFERATION	0.00341814	0.161934	3.81914e-09	0.220496	0.00169379	0.173481	0.000415612	0.133159	0.00045761	0.193298	2.54108e-08	0.208741	0.927409	-0.0050731	0.0368499	0.0789716
GO_MOVEMENT_IN_ENVIRONMENT_OF_OTHER_ORGANISM_INVOLVED_IN_SYMBIOTIC_INTERACTION	1.76718e-27	0.553469	1.31224e-52	0.533231	5.23333e-43	0.665933	1.77361e-58	0.558092	5.20598e-32	0.591152	6.84675e-82	0.64025	4.88874e-06	0.250386	1.7156e-21	0.349335
GO_REGULATION_OF_PROTEIN_TARGETING_TO_MITOCHONDRION	0.0583094	0.105139	0.941908	0.00276119	0.137012	0.0826619	0.00749872	0.101056	0.0981067	0.0919129	0.00498401	0.106101	0.0257266	0.123717	4.15475e-05	0.154373
GO_APICAL_PROTEIN_LOCALIZATION	0.0108771	-0.141097	0.00577271	-0.10431	0.00299106	-0.164185	1.04216e-05	-0.165875	0.00013597	-0.210082	0.000125031	-0.144588	0.0010497	-0.180962	1.3816e-06	-0.181406
GO_REGULATION_OF_ESTABLISHMENT_OF_PLANAR_POLARITY	5.51913e-10	0.335388	1.01234e-07	0.199716	2.16065e-09	0.324239	1.27473e-30	0.415955	5.32374e-09	0.316616	8.1216e-32	0.423656	0.0558486	0.10618	1.84781e-10	0.23802
GO_FOREBRAIN_NEURON_DEVELOPMENT	3.31728e-08	-0.300455	9.19011e-11	-0.24187	4.70828e-06	-0.250804	5.97776e-14	-0.278847	9.00826e-11	-0.349538	2.49144e-14	-0.282899	0.000129638	-0.210715	9.13259e-10	-0.228952
GO_POSITIVE_REGULATION_OF_PROTEIN_MATURATION	5.55344e-10	0.335338	1.5047e-13	0.274499	1.10492e-11	0.365082	2.17229e-23	0.364513	4.28535e-13	0.387619	5.89063e-23	0.361119	1.78775e-07	0.284647	9.80991e-17	0.307127
GO_NEUROMUSCULAR_JUNCTION_DEVELOPMENT	2.56497e-05	-0.231194	5.17915e-09	-0.218651	0.000357004	-0.196845	1.92451e-26	-0.387348	5.05332e-05	-0.222853	2.9916e-21	-0.347343	7.51851e-05	-0.217816	3.74229e-11	-0.246726
GO_MITOTIC_CYTOKINESIS	0.0860418	0.0953733	0.0213307	0.087063	0.0662843	0.101998	0.00661064	0.102635	0.352924	0.0516926	0.00124967	0.121831	0.0736989	-0.0993442	0.576766	-0.0211453
GO_NEGATIVE_REGULATION_OF_RESPONSE_TO_ENDOPLASMIC_RETICULUM_STRESS	1.17479e-09	0.329272	5.58024e-17	0.309471	3.24556e-14	0.40436	8.61859e-28	0.39689	7.53131e-11	0.350898	5.93081e-35	0.442958	0.417513	0.0451229	0.00125812	0.121758
GO_SMAD_PROTEIN_SIGNAL_TRANSDUCTION	0.384341	0.048413	0.0336902	0.0803419	0.703688	0.0211771	0.0771949	-0.0668864	0.0608086	0.104118	0.371931	0.033822	0.630768	-0.0267597	0.134641	-0.0566417
GO_CYTOPLASMIC_TRANSLATION	0.439127	-0.0430614	1.4192e-05	-0.163375	0.403802	-0.0464632	0.505291	0.0252387	0.0748069	-0.0989665	0.160263	-0.0531689	0.0493334	-0.109132	0.428632	-0.0299855
GO_MEIOTIC_CHROMOSOME_SEGREGATION	0.0558703	-0.10617	0.0578804	0.071772	0.00455612	-0.156988	0.000122299	0.144791	0.00904144	-0.144599	0.000864445	0.125726	0.00354165	-0.16133	0.275629	0.0412911
GO_POSITIVE_REGULATION_OF_CALCIUM_ION_TRANSPORT	2.77496e-12	0.374878	2.11296e-09	0.224036	1.00602e-13	0.397137	3.02847e-10	0.235256	3.19612e-12	0.373891	6.09223e-14	0.278759	0.0131541	0.137418	0.000331122	0.13539
GO_REGULATION_OF_DOUBLE_STRAND_BREAK_REPAIR	0.830768	0.0119003	0.233172	0.045152	0.682449	0.0227789	0.129003	0.0574731	0.938544	-0.00429329	0.101954	0.06191	0.166875	-0.0768597	0.353669	-0.0351331
GO_RNA_DEPENDENT_DNA_BIOSYNTHETIC_PROCESS	0.074367	-0.0991159	8.68221e-05	-0.147895	0.148553	-0.0803153	0.00557595	-0.104735	0.0421527	-0.11279	6.3901e-05	-0.150621	0.00929422	-0.144081	3.47797e-06	-0.174479
GO_REGULATION_OF_B_CELL_RECEPTOR_SIGNALING_PATHWAY	1.37811e-25	0.536189	1.19358e-72	0.610616	4.7305e-42	0.660195	5.05495e-66	0.587244	3.51466e-30	0.576517	8.24234e-98	0.684639	6.38794e-07	0.272014	4.51431e-29	0.405672
GO_REGULATION_OF_G_PROTEIN_COUPLED_RECEPTOR_PROTEIN_SIGNALING_PATHWAY	0.069161	0.100941	0.799833	0.00960761	0.111169	0.0885291	0.740343	0.0125567	0.0411407	0.113347	0.363438	0.0344267	0.781575	0.0154386	0.269872	-0.0417894
GO_DENDRITE_DEVELOPMENT	3.23966e-11	-0.357219	1.39965e-08	-0.212513	3.16631e-11	-0.357389	1.19926e-29	-0.409535	1.56336e-13	-0.394274	3.69598e-26	-0.385302	1.54906e-10	-0.34538	1.01215e-22	-0.35926
GO_REGULATION_OF_RESPIRATORY_BURST	9.23491e-16	0.426012	1.73603e-11	0.250797	9.51697e-21	0.486878	5.87577e-17	0.309258	2.64768e-21	0.492964	4.45086e-21	0.34591	6.32277e-10	0.334297	2.44049e-19	0.331044
GO_G_PROTEIN_COUPLED_RECEPTOR_INTERNALIZATION	0.00153495	0.175044	0.00189789	0.117275	0.0133855	0.137076	9.695e-05	0.146902	0.00923824	0.144195	0.000114095	0.145425	0.0148412	0.135039	0.0142309	0.092686
GO_MEMORY	5.42805e-07	-0.273665	2.14715e-14	-0.283581	4.97089e-07	-0.274553	9.36173e-26	-0.382364	1.20156e-08	-0.309546	1.75745e-24	-0.372892	2.79424e-09	-0.322087	1.96617e-19	-0.331867
GO_NEURON_DEVELOPMENT	2.6976e-13	-0.390692	2.59334e-13	-0.271899	1.21653e-11	-0.364388	2.22041e-33	-0.433432	2.7302e-15	-0.419582	1.31509e-30	-0.415867	3.63735e-10	-0.338706	2.35834e-22	-0.35633
GO_REGULATION_OF_GOLGI_ORGANIZATION	0.0128421	-0.137887	8.58134e-05	-0.148	0.0180652	-0.131085	4.08251e-15	-0.29107	2.53884e-05	-0.231317	3.98072e-11	-0.246396	1.46337e-05	-0.237871	1.34902e-06	-0.181581
GO_ENDOTHELIAL_CELL_DEVELOPMENT	8.64984e-09	0.312423	5.18361e-32	0.424893	1.34923e-10	0.346445	2.49994e-23	0.364037	3.51895e-10	0.338968	1.98189e-36	0.451629	0.290583	0.0587989	1.67316e-08	0.211392
GO_POSITIVE_REGULATION_OF_MYOTUBE_DIFFERENTIATION	3.41376e-12	0.37343	5.37216e-37	0.454895	1.0959e-14	0.411132	3.63142e-30	0.412974	6.25211e-14	0.400195	1.77476e-49	0.519068	0.00139005	0.176606	2.64902e-23	0.363841
GO_REGULATION_OF_CELL_ACTIVATION	1.30049e-33	0.603387	1.12687e-80	0.636528	7.37767e-55	0.727825	3.83087e-82	0.641015	1.39877e-49	0.702202	4.53197e-125	0.745779	8.72795e-13	0.382832	8.62122e-40	0.470493
GO_MULTICELLULAR_ORGANISM_AGING	0.262709	0.0623067	3.38892e-08	0.206895	0.219933	0.068229	6.1116e-08	0.203059	0.518183	0.0359689	1.41507e-09	0.2264	0.00854741	-0.145649	0.681774	0.0155362
GO_ATP_DEPENDENT_CHROMATIN_REMODELING	0.17505	0.0754093	0.286075	0.0404048	0.328679	0.0543513	0.000898404	0.125324	0.139597	0.0821235	0.0035625	0.110099	0.763874	0.0167263	0.165953	0.0524557
GO_ANATOMICAL_STRUCTURE_FORMATION_INVOLVED_IN_MORPHOGENESIS	1.88497e-11	0.361205	9.97173e-18	0.316501	3.74547e-12	0.37278	9.1931e-07	0.18438	1.50417e-13	0.394526	2.34948e-17	0.313026	0.438635	0.0431077	0.00520051	0.105585
GO_ION_TRANSPORT	0.812729	-0.0131915	0.0757589	-0.0672128	0.461225	-0.0410129	0.055878	-0.0723526	0.099529	-0.0915277	0.0651497	-0.069795	0.00254889	-0.166848	0.0010086	-0.124109
GO_LIPID_MODIFICATION	0.407766	-0.0460729	0.00496165	0.106155	0.973448	-0.00185341	0.024414	-0.0851215	0.0906593	-0.0940057	0.966308	0.00160052	0.0031653	-0.163233	0.88402	-0.00552738
GO_NEGATIVE_REGULATION_OF_KIDNEY_DEVELOPMENT	6.21013e-12	0.369208	2.57644e-08	0.208653	6.93182e-14	0.399535	4.31631e-16	0.300866	5.66799e-17	0.441963	1.60053e-17	0.314588	3.90485e-08	0.298966	0.00116829	0.122551
GO_REGULATION_OF_HEPATOCYTE_PROLIFERATION	0.000159226	0.207973	0.000164236	0.142068	6.6633e-07	0.271584	8.26583e-07	0.185148	1.06791e-06	0.26673	3.73592e-07	0.19079	0.749002	-0.0178152	0.544979	0.0229326
GO_ACYLGLYCEROL_HOMEOSTASIS	0.119947	0.0864273	3.98884e-09	0.220234	0.0321164	0.118906	1.49742e-05	0.162937	0.581906	0.0306529	1.18612e-07	0.198655	0.0817859	-0.0966872	0.0144081	0.0925182
GO_NEGATIVE_REGULATION_OF_PHOSPHOPROTEIN_PHOSPHATASE_ACTIVITY	1.71848e-05	0.235979	4.97832e-07	0.18877	1.24175e-06	0.265158	1.01368e-11	0.253606	0.00143902	0.176062	2.44513e-20	0.339684	0.284289	-0.0595704	0.016866	0.0903603
GO_NEGATIVE_REGULATION_OF_PROTEIN_COMPLEX_ASSEMBLY	0.266914	-0.0617619	0.778228	0.010671	0.606064	-0.0287106	0.000449291	-0.132386	0.264434	-0.0620824	0.0972466	-0.0627751	0.0109773	-0.140922	0.783176	-0.0104268
GO_HEMOGLOBIN_METABOLIC_PROCESS	0.00048289	0.192522	0.0568596	0.0720659	0.00011231	0.212608	0.620085	0.0187822	4.5706e-05	0.224108	0.305629	0.0388026	0.25145	0.0637959	0.696711	0.0147679
GO_SINGLE_FERTILIZATION	0.0171518	0.132138	0.535515	-0.0234746	0.426094	0.0442973	1.08324e-06	0.183188	0.157492	0.0785916	0.00476921	0.106633	0.193943	0.0722399	0.335942	0.0364474
GO_LEUKOCYTE_ACTIVATION	9.99879e-33	0.596688	1.24772e-81	0.639457	4.52239e-55	0.7288	1.31155e-80	0.636325	4.62748e-47	0.688919	2.04479e-125	0.746457	2.03332e-11	0.360651	4.15505e-37	0.455533
GO_CHROMOSOME_ORGANIZATION	0.00155938	-0.174795	0.00438042	-0.107653	0.00150034	-0.175405	8.77708e-05	-0.147798	0.000445604	-0.193681	0.000100912	-0.14654	0.00183503	-0.172199	2.07275e-05	-0.160256
GO_REGULATION_OF_MITOCHONDRIAL_DEPOLARIZATION	1.8934e-05	0.23483	4.81498e-08	0.204619	3.50543e-09	0.320175	5.45298e-11	0.244704	5.19508e-06	0.24971	5.85757e-11	0.244318	0.529617	0.0349921	0.00086929	0.125667
GO_NEGATIVE_REGULATION_OF_MAP_KINASE_ACTIVITY	7.34793e-12	0.368009	5.26864e-22	0.353518	1.45506e-18	0.4617	7.97859e-28	0.397123	1.90388e-13	0.392985	9.07085e-38	0.459288	0.366169	0.0502888	1.03466e-05	0.165933
GO_SYNAPTIC_VESICLE_LOCALIZATION	4.41749e-08	-0.297834	4.98642e-19	-0.328304	2.07097e-09	-0.324592	1.90222e-22	-0.357077	2.35629e-09	-0.323515	4.70823e-26	-0.38454	1.19232e-06	-0.265583	4.47599e-18	-0.319709
GO_PHENOL_CONTAINING_COMPOUND_METABOLIC_PROCESS	0.425748	-0.0443303	0.000137281	-0.143729	0.145112	-0.0809998	3.31601e-08	-0.207035	0.137685	-0.0825209	1.03083e-06	-0.183549	0.0249123	-0.124402	4.40807e-05	-0.153863
GO_REGULATION_OF_ANTIGEN_RECEPTOR_MEDIATED_SIGNALING_PATHWAY	2.91663e-32	0.593108	8.97455e-66	0.586326	4.49953e-48	0.694342	1.20961e-73	0.613961	5.17719e-42	0.659957	6.77147e-103	0.697322	1.9434e-10	0.343622	1.83714e-29	0.408298
GO_ESTABLISHMENT_OF_SPINDLE_ORIENTATION	0.903555	0.00674735	0.246259	0.0439132	0.729803	0.019231	7.12059e-06	-0.16891	0.567537	-0.0318259	0.00378665	-0.109381	0.106804	-0.0896231	0.0156993	-0.0913476
GO_METANEPHRIC_NEPHRON_MORPHOGENESIS	0.645275	0.0256294	0.126438	0.0578608	0.165147	-0.0771731	0.241621	-0.0443468	0.74442	0.018152	0.93678	0.00300545	0.446392	-0.0423816	0.481057	-0.0266936
GO_GLYCERALDEHYDE_3_PHOSPHATE_METABOLIC_PROCESS	4.34223e-09	0.318357	2.18229e-12	0.261443	3.49889e-12	0.373258	1.17089e-31	0.422644	3.56597e-08	0.299796	6.08851e-30	0.411492	0.000313653	0.19867	6.18856e-13	0.267684
GO_RESPONSE_TO_UV_C	6.54822e-05	0.219581	4.51498e-10	0.232997	9.23118e-09	0.311856	3.53742e-09	0.220958	0.000255071	0.201551	2.04512e-13	0.273037	0.397255	-0.0471127	0.49743	0.0257064
GO_CARBOHYDRATE_CATABOLIC_PROCESS	1.17187e-08	0.309766	2.00474e-11	0.25004	3.25563e-11	0.357183	1.3709e-20	0.341815	8.75375e-06	0.24382	2.0164e-23	0.364764	0.303904	0.0572023	3.47945e-12	0.25909
GO_DENTATE_GYRUS_DEVELOPMENT	0.0128086	-0.137938	0.00785385	-0.100471	0.00022949	-0.203009	0.00251914	-0.114097	0.0291938	-0.120994	0.00128619	-0.121521	0.244486	-0.0647404	1.45832e-07	-0.197262
GO_ESTABLISHMENT_OR_MAINTENANCE_OF_TRANSMEMBRANE_ELECTROCHEMICAL_GRADIENT	0.00796583	0.146957	0.521968	0.0242588	0.0321113	0.11891	0.0920207	0.0637755	0.0800352	0.0972437	0.0972162	0.0627808	0.554406	0.0329101	0.00710771	0.101729
GO_LABYRINTHINE_LAYER_DEVELOPMENT	8.96293e-10	0.331478	4.99968e-14	0.27968	1.40852e-10	0.346114	6.43529e-12	0.255952	3.11205e-14	0.404625	6.29145e-23	0.360893	0.111111	0.0885434	6.37384e-05	0.150644
GO_N_TERMINAL_PROTEIN_AMINO_ACID_ACETYLATION	3.59582e-05	-0.227077	0.0117852	-0.0952128	0.000516365	-0.19155	4.09207e-13	-0.269698	1.02032e-06	-0.267204	6.30051e-10	-0.231093	0.00337505	-0.162149	1.194e-05	-0.164778
GO_NEUROLOGICAL_SYSTEM_PROCESS	0.0786825	-0.0976805	2.12597e-12	-0.261574	0.00709695	-0.149079	6.40216e-32	-0.424312	0.00142813	-0.176182	2.77086e-31	-0.420248	0.00252608	-0.166996	2.11262e-17	-0.31346
GO_NEURONAL_STEM_CELL_DIVISION	0.000304333	0.199093	1.49119e-16	0.305372	2.21485e-06	0.25903	5.6306e-11	0.244531	0.000445949	0.19367	5.0012e-20	0.337026	0.726351	0.0194868	0.000380538	0.134028
GO_CERAMIDE_CATABOLIC_PROCESS	5.09035e-12	0.370618	7.08886e-12	0.255455	8.84574e-20	0.475973	3.28037e-23	0.363115	9.99462e-10	0.330592	1.438e-20	0.341639	0.578532	0.030927	0.018139	0.0893492
GO_EXCRETION	0.00012809	0.210874	0.884017	-0.00552747	0.00103304	0.181207	0.106149	0.0611654	0.000106483	0.213307	0.143369	0.055406	0.066423	0.101946	0.987557	-0.000590949
GO_DIGESTION	0.143648	0.081295	0.197773	0.048772	0.348986	0.0521164	0.411192	-0.0311315	0.121516	0.0860642	0.419156	0.0306047	0.180668	0.0744415	0.0023272	0.114994
GO_POSITIVE_REGULATION_OF_SYNAPTIC_TRANSMISSION_GLUTAMATERGIC	2.09625e-12	-0.376827	9.01978e-14	-0.276919	1.39168e-13	-0.395032	3.47567e-34	-0.438346	4.59036e-17	-0.443135	1.37832e-31	-0.422192	1.89529e-11	-0.361165	3.30646e-23	-0.363088
GO_POSITIVE_REGULATION_OF_MITOTIC_NUCLEAR_DIVISION	1.08073e-06	0.266606	1.12931e-05	0.165229	3.4117e-05	0.227723	8.57684e-17	0.307687	3.06342e-06	0.255527	1.91914e-16	0.30431	0.570268	0.0316018	0.00722971	0.101516
GO_HINDBRAIN_DEVELOPMENT	1.8308e-22	-0.505293	1.9377e-19	-0.331923	1.71711e-25	-0.53529	2.26001e-50	-0.523185	7.51961e-29	-0.565393	1.62324e-47	-0.509844	1.48815e-15	-0.423199	1.17314e-34	-0.441187
GO_OLIGOSACCHARIDE_METABOLIC_PROCESS	5.52555e-17	0.442105	7.54699e-44	0.4918	2.15757e-29	0.569978	6.03493e-31	0.418066	6.53678e-18	0.453758	7.12139e-47	0.506761	0.00336443	0.162202	9.03004e-11	0.241966
GO_NEGATIVE_REGULATION_OF_DENDRITIC_SPINE_DEVELOPMENT	7.0142e-10	-0.333462	2.61896e-20	-0.33943	7.06157e-09	-0.314183	2.29336e-28	-0.400865	2.51485e-12	-0.375563	6.66921e-30	-0.411229	1.37657e-09	-0.327972	2.92516e-21	-0.347423
GO_MODULATION_OF_GROWTH_OF_SYMBIONT_INVOLVED_IN_INTERACTION_WITH_HOST	3.77203e-15	0.417638	1.55873e-21	0.349677	1.65026e-22	0.505762	2.05005e-31	0.421089	1.30312e-17	0.45004	1.34294e-39	0.469444	1.75065e-05	0.23576	1.58156e-13	0.274262
GO_CHROMOSOME_SEGREGATION	0.870709	-0.00906291	0.234623	0.0450123	0.594982	-0.0295971	0.000752294	0.127166	0.454109	-0.0416664	0.00237131	0.114782	0.0445763	-0.111501	0.651663	-0.0171049
GO_NEGATIVE_REGULATION_OF_CYCLIN_DEPENDENT_PROTEIN_KINASE_ACTIVITY	0.0130703	0.137543	0.743949	0.0123759	0.0104411	0.141879	0.61989	-0.0187927	0.029288	0.120924	0.432468	-0.0297372	0.088524	-0.094631	0.612291	-0.0192018
GO_ETHER_METABOLIC_PROCESS	0.534064	-0.0346151	0.00456255	-0.107165	0.198695	-0.0714786	0.00739332	0.101234	0.908504	0.00639954	0.627828	0.0183676	0.874083	-0.00882438	0.278174	0.0410731
GO_HEMATOPOIETIC_PROGENITOR_CELL_DIFFERENTIATION	0.0395775	0.114231	2.24183e-15	0.293721	6.45943e-07	0.271901	0.32649	0.0371664	0.0312158	0.119531	0.00015661	0.14251	0.599337	-0.0292478	0.19797	0.0487506
GO_CYTOKINE_METABOLIC_PROCESS	5.13602e-28	0.558194	5.90311e-55	0.543424	1.37379e-35	0.617782	1.74149e-67	0.592571	6.08157e-36	0.620283	4.22339e-89	0.6613	5.18015e-12	0.370494	1.08735e-34	0.441385
GO_ANTEROGRADE_AXONAL_TRANSPORT	0.157582	-0.0785746	1.02972e-15	-0.29712	0.0861018	-0.0953552	2.44439e-07	-0.193735	0.237392	-0.0657218	7.24613e-14	-0.277947	0.257514	-0.0629882	4.22001e-11	-0.246083
GO_NEGATIVE_REGULATION_OF_ERK1_AND_ERK2_CASCADE	5.85341e-11	0.352801	6.86165e-21	0.344342	1.73881e-14	0.408271	1.57641e-27	0.395059	7.3546e-14	0.399155	5.56047e-40	0.471527	0.0183945	0.130717	5.60029e-11	0.24456
GO_STEROID_BIOSYNTHETIC_PROCESS	0.982302	-0.00123524	5.67096e-07	-0.187846	0.153723	-0.079309	0.142712	-0.055497	0.309705	-0.0565215	0.0014706	-0.120074	0.0970067	-0.0922139	0.0626808	-0.0704451
GO_ALDITOL_PHOSPHATE_METABOLIC_PROCESS	0.000136471	0.210034	1.86055e-13	0.273488	5.9935e-05	0.220704	5.06982e-15	0.290106	5.99502e-06	0.248108	4.07907e-18	0.320078	0.000194406	0.205277	2.62925e-05	0.158268
GO_SODIUM_INDEPENDENT_ORGANIC_ANION_TRANSPORT	0.606258	0.0286952	0.784434	-0.0103647	0.612856	0.0281708	2.78632e-05	-0.157779	0.493318	-0.0381323	0.00311604	-0.111658	0.517213	-0.0360523	0.657914	-0.0167769
GO_REGULATION_OF_PROTEIN_TYROSINE_KINASE_ACTIVITY	2.26214e-05	0.232706	3.09441e-19	0.330137	7.3657e-11	0.351066	1.21899e-11	0.252647	1.76766e-05	0.235645	8.78531e-20	0.334915	0.3274	-0.0544949	0.0457438	0.075589
GO_REGULATION_OF_INTERFERON_BETA_PRODUCTION	1.65306e-24	0.525869	2.47165e-70	0.602665	8.41105e-40	0.646176	3.10222e-43	0.488671	9.5055e-34	0.604402	5.12806e-75	0.618515	5.33785e-10	0.335655	1.2318e-22	0.358582
GO_DNA_TEMPLATED_TRANSCRIPTION_ELONGATION	0.0318527	-0.119088	5.1615e-05	-0.152493	0.00273157	-0.1657	0.936141	-0.00303586	0.01449	-0.135514	0.0770269	-0.0669244	0.23854	-0.0655617	0.121766	-0.0585827
GO_N_GLYCAN_PROCESSING	8.155e-09	0.312935	7.20046e-21	0.344166	4.88091e-17	0.442794	1.70374e-08	0.211278	8.0215e-11	0.35042	2.58249e-16	0.303054	0.211565	0.0694811	0.0181806	0.0893172
GO_INORGANIC_ION_IMPORT_INTO_CELL	7.89199e-13	0.383515	6.46271e-22	0.352798	7.56207e-18	0.452976	3.54227e-25	0.378104	7.08232e-13	0.384246	1.1072e-35	0.447271	0.160844	0.0779641	1.9688e-05	0.160683
GO_ENDOPLASMIC_RETICULUM_TO_CYTOSOL_TRANSPORT	6.73609e-21	0.488534	5.75076e-22	0.353209	2.57893e-23	0.514031	1.50749e-45	0.500296	3.06445e-22	0.502954	6.01737e-49	0.516602	3.86651e-07	0.27707	2.2848e-17	0.31314
GO_NEGATIVE_REGULATION_OF_REPRODUCTIVE_PROCESS	1.61342e-13	0.394068	1.39816e-07	0.197547	1.50257e-13	0.394533	1.99314e-17	0.313697	3.60817e-17	0.444467	8.0434e-19	0.326455	6.42556e-06	0.247328	1.07612e-07	0.199307
GO_G_PROTEIN_COUPLED_PURINERGIC_RECEPTOR_SIGNALING_PATHWAY	9.23445e-12	0.366373	1.44958e-64	0.581836	3.83177e-19	0.468584	9.41214e-46	0.501302	1.44311e-14	0.40943	1.93167e-70	0.603037	0.000165999	0.207414	9.18321e-32	0.423317
GO_MEMBRANE_DEPOLARIZATION	9.71002e-08	-0.290487	3.00924e-17	-0.312014	9.4183e-08	-0.290776	8.229e-32	-0.42362	1.59208e-08	-0.307057	3.68982e-33	-0.432071	1.45991e-07	-0.2866	2.09065e-17	-0.313502
GO_OLFACTORY_BULB_INTERNEURON_DIFFERENTIATION	0.885957	-0.00798629	0.360929	0.034607	0.463718	0.0407853	0.871171	-0.0061448	0.209517	-0.0697931	0.262581	0.0424309	0.122829	-0.0857634	0.896351	0.00493615
GO_POSITIVE_REGULATION_OF_G_PROTEIN_COUPLED_RECEPTOR_PROTEIN_SIGNALING_PATHWAY	1.22875e-06	0.265268	0.527777	0.0239213	1.08243e-07	0.289457	0.0120047	0.094968	5.31949e-06	0.249446	0.0248985	0.0848359	0.0480805	0.109737	0.180632	0.0506967
GO_ATTACHMENT_OF_SPINDLE_MICROTUBULES_TO_KINETOCHORE	0.00311033	0.163528	0.000295045	0.136509	0.00264023	0.166265	8.04269e-15	0.288038	0.0063907	0.150982	1.21592e-12	0.26436	0.198904	-0.0714454	0.362646	0.0344835
GO_REGULATION_OF_LYASE_ACTIVITY	2.45615e-06	-0.257919	5.99545e-10	-0.231378	6.12063e-06	-0.247875	6.78447e-15	-0.288803	2.44133e-06	-0.257984	2.75333e-13	-0.271611	0.000665831	-0.187821	1.09962e-05	-0.165443
GO_RESPONSE_TO_NITROGEN_COMPOUND	0.00180898	0.172429	1.97347e-07	0.195204	7.00669e-05	0.218719	0.0121256	0.0948348	0.00286454	0.164908	6.37698e-08	0.20278	0.0224711	-0.126578	0.829885	-0.00814079
GO_NEGATIVE_REGULATION_OF_TRANSMEMBRANE_TRANSPORT	3.83004e-07	0.277165	0.000920882	0.125065	9.09822e-07	0.26839	1.4585e-11	0.25171	4.31254e-07	0.275979	2.28856e-14	0.283289	0.077284	0.0981385	3.85112e-05	0.155026
GO_REGULATION_OF_DNA_RECOMBINATION	3.84593e-09	0.319389	1.35674e-14	0.285675	1.45691e-09	0.327505	2.12661e-25	0.379745	2.04982e-08	0.304803	4.95303e-28	0.39856	0.264655	0.0620538	0.000270132	0.13736
GO_REGULATION_OF_LEUKOCYTE_PROLIFERATION	1.66942e-32	0.59498	1.51691e-78	0.629888	3.16033e-50	0.705494	6.78561e-84	0.64627	2.92738e-50	0.705662	2.88954e-124	0.744194	5.50614e-16	0.429032	1.37646e-41	0.480113
GO_RESPONSE_TO_ETHANOL	0.0291968	0.120992	0.160744	0.0531078	0.00291731	0.164603	7.23733e-06	0.168781	0.144811	0.0810603	8.56304e-08	0.200831	0.210886	-0.0695843	0.624354	0.0185533
GO_SULFUR_COMPOUND_METABOLIC_PROCESS	0.00016391	0.207584	0.000106658	0.146038	6.78489e-06	0.246714	1.42613e-11	0.251828	0.000974736	0.182094	1.28003e-11	0.252392	0.974895	0.0017524	1.86175e-06	0.179197
GO_POSITIVE_REGULATION_OF_TYROSINE_PHOSPHORYLATION_OF_STAT1_PROTEIN	5.66453e-16	0.428867	6.12071e-24	0.368765	2.50108e-19	0.470753	9.73663e-31	0.416718	1.76245e-18	0.460698	1.131e-43	0.490907	6.6853e-07	0.271551	9.43294e-18	0.316725
GO_REGULATION_OF_CELL_CYCLE_CHECKPOINT	0.598724	0.0292969	0.52801	0.0239078	0.408506	0.0460004	8.67673e-05	0.147901	0.92002	-0.00559116	0.00145221	0.120211	0.141683	-0.0816945	0.809048	0.00915639
GO_NEGATIVE_REGULATION_OF_TRANSCRIPTION_REGULATORY_REGION_DNA_BINDING	1.0681e-06	-0.266729	6.23532e-15	-0.289181	4.31787e-09	-0.318405	2.65839e-16	-0.302931	1.24848e-08	-0.309208	5.9377e-20	-0.336384	0.000683108	-0.187441	7.85971e-09	-0.216098
GO_POSITIVE_REGULATION_OF_DNA_REPLICATION	0.0297511	0.120582	0.593793	0.0202071	0.232589	0.0663982	4.38407e-08	0.205229	0.722972	0.0197377	6.32715e-07	0.187066	0.0106604	-0.141482	0.549355	0.0226836
GO_NEGATIVE_REGULATION_OF_NEURON_APOPTOTIC_PROCESS	0.366395	-0.0502651	0.062413	-0.0705168	0.767983	-0.0164267	0.0114327	-0.0956145	0.0993755	-0.0915691	0.240316	-0.0444698	0.000100177	-0.214105	1.67278e-07	-0.196332
GO_POSITIVE_REGULATION_OF_REPRODUCTIVE_PROCESS	3.75567e-09	0.319591	3.05328e-08	0.207566	6.31333e-08	0.294528	5.93401e-15	0.289403	3.68828e-10	0.338596	2.20831e-21	0.348432	0.122032	0.0859457	2.06892e-05	0.160271
GO_POSITIVE_REGULATION_OF_METANEPHROS_DEVELOPMENT	3.14143e-07	0.279132	0.000165171	0.142015	1.7975e-06	0.261259	5.14838e-06	0.171452	8.93731e-09	0.312138	3.95486e-11	0.246431	0.138313	0.0823899	0.0701935	0.0685276
GO_POSITIVE_REGULATION_OF_LYMPHOCYTE_APOPTOTIC_PROCESS	4.20519e-22	0.501509	9.14896e-39	0.464861	5.23225e-35	0.613627	3.19444e-68	0.595216	3.77295e-29	0.567934	1.23237e-76	0.623792	1.15224e-09	0.329431	1.34168e-29	0.40921
GO_NUCLEOTIDE_PHOSPHORYLATION	9.43149e-06	0.242966	4.20712e-05	0.154265	0.000593241	0.189523	6.35383e-22	0.352858	0.0114717	0.140075	6.60177e-22	0.352723	0.443316	0.0426686	6.43695e-11	0.243807
GO_POSITIVE_REGULATION_OF_GENE_EXPRESSION_EPIGENETIC	0.237216	0.0657464	0.595507	0.0201134	0.548208	0.0334263	0.972157	-0.00132255	0.767491	0.0164625	0.922084	0.00370611	0.398518	-0.0469869	0.349163	-0.0354632
GO_GLUTAMATE_SECRETION	2.13758e-16	-0.434481	5.83128e-32	-0.424569	6.02001e-20	-0.477884	3.60242e-41	-0.477903	6.84881e-21	-0.488455	3.55662e-47	-0.508212	9.67707e-10	-0.330855	9.37622e-21	-0.343205
GO_REGULATION_OF_MRNA_METABOLIC_PROCESS	0.00234686	-0.168207	0.000251155	-0.138058	0.00155192	-0.17487	2.68077e-15	-0.292933	0.0100701	-0.142567	5.10641e-13	-0.268622	0.18376	-0.0739184	1.0193e-05	-0.166053
GO_POSITIVE_REGULATION_OF_PROTEIN_BINDING	0.00198709	0.170917	5.9569e-08	0.203227	9.06708e-06	0.243418	0.00269949	0.113309	0.0088005	0.145104	2.74348e-08	0.208252	0.0131239	-0.137463	0.89836	0.00483997
GO_REGULATION_OF_NFAT_PROTEIN_IMPORT_INTO_NUCLEUS	2.19446e-06	-0.259129	2.80915e-08	-0.2081	1.75163e-06	-0.261534	6.49096e-23	-0.360786	6.65362e-11	-0.351835	1.69883e-18	-0.323537	7.1169e-10	-0.333344	1.15492e-18	-0.325047
GO_REGULATION_OF_VASCULOGENESIS	0.252958	-0.0635939	0.214777	-0.0469795	0.24637	-0.0644829	0.190355	-0.0495892	0.619332	-0.0276586	0.157981	-0.0534602	0.00143514	-0.176105	0.00042948	-0.132834
GO_LENS_FIBER_CELL_DIFFERENTIATION	0.6552	0.0248621	0.192417	0.0493598	0.799094	-0.0141721	1.15247e-08	-0.213728	0.743488	-0.0182206	0.0133555	-0.093543	0.867037	-0.00932268	0.0156594	-0.0913824
GO_SENSORY_PERCEPTION	0.742649	-0.0182824	1.68155e-07	-0.196296	0.220391	-0.0681614	1.37331e-25	-0.381144	0.359072	-0.0510369	2.07886e-24	-0.37234	0.445482	-0.0424664	1.71847e-07	-0.196148
GO_HEPATICOBILIARY_SYSTEM_DEVELOPMENT	0.000507175	0.191811	7.33239e-21	0.3441	0.00220386	0.169235	5.90594e-06	0.170381	0.000194376	0.205279	1.50688e-15	0.295462	0.48006	-0.0393096	0.00985058	0.0975652
GO_FATTY_ACID_CATABOLIC_PROCESS	0.655891	0.0248088	0.128334	0.0575737	0.922071	0.00544735	0.461305	0.0279091	0.437067	-0.0432553	0.276886	0.0411833	0.871109	0.00903466	0.000804721	0.12647
GO_REGULATION_OF_VESICLE_FUSION	0.336468	-0.0534838	0.978213	-0.00103477	0.534941	0.0345409	1.01446e-10	-0.241329	0.215056	-0.0689545	4.89253e-06	-0.171849	0.017595	-0.131621	0.0208166	-0.0874103
GO_MITOCHONDRIAL_RESPIRATORY_CHAIN_COMPLEX_I_BIOGENESIS	0.293495	-0.0584458	5.81177e-07	-0.187672	0.0130837	-0.137523	0.00203779	0.116484	0.606035	-0.028713	0.732071	-0.0129724	0.130688	0.0840125	0.0847272	0.0652509
GO_REGULATION_OF_LIPID_STORAGE	1.00328e-06	0.267378	1.7504e-30	0.415056	8.88256e-10	0.331551	7.35534e-18	0.317725	0.00011205	0.212639	3.51043e-29	0.406409	0.690158	0.0221954	1.07879e-09	0.227985
GO_CARBOHYDRATE_TRANSPORT	8.15324e-10	0.332246	2.66509e-26	0.386329	1.01357e-10	0.348638	1.43129e-22	0.358063	9.66534e-07	0.267765	3.06808e-36	0.450528	0.118511	0.0867627	2.40862e-07	0.193837
GO_REGULATION_OF_CELLULAR_RESPONSE_TO_GROWTH_FACTOR_STIMULUS	2.60983e-09	0.32266	7.06595e-10	0.230434	1.42236e-10	0.346039	1.54913e-06	0.180561	6.89548e-10	0.333599	9.34267e-14	0.276754	0.444746	0.0425351	0.055167	0.072563
GO_EMBRYONIC_HEMOPOIESIS	0.000587259	0.189672	1.64696e-25	0.380563	2.67136e-07	0.28073	2.4292e-08	0.209029	0.000515836	0.191565	5.17808e-19	0.328158	0.435494	-0.0434037	0.0100711	0.0972773
GO_EMBRYO_DEVELOPMENT_ENDING_IN_BIRTH_OR_EGG_HATCHING	0.0017188	0.173247	7.61653e-07	0.185738	0.0070857	0.149108	0.208855	0.0475918	0.00701388	0.149294	5.48496e-05	0.151963	0.928081	-0.00502606	0.929344	0.0033598
GO_ANTIGEN_PROCESSING_AND_PRESENTATION_OF_PEPTIDE_OR_POLYSACCHARIDE_ANTIGEN_VIA_MHC_CLASS_II	7.06037e-08	0.293485	7.09507e-16	0.298731	5.38742e-15	0.415479	1.63372e-30	0.415252	9.34736e-09	0.311747	9.05091e-32	0.423357	0.459497	0.0411711	0.000321643	0.135672
GO_RESPONSE_TO_IONIZING_RADIATION	1.00882e-07	0.290125	4.11267e-13	0.269673	3.95601e-09	0.31915	3.36761e-25	0.378267	5.38826e-08	0.296	2.97083e-29	0.406897	0.291436	0.0586953	4.15816e-05	0.154366
GO_PROTEIN_EXPORT_FROM_NUCLEUS	0.215798	-0.0688435	0.638096	0.0178213	0.553454	-0.0329892	0.0896648	-0.0642415	0.0545372	-0.10675	0.480681	-0.0267164	0.00896986	-0.144748	0.00223054	-0.115472
GO_EPITHELIUM_DEVELOPMENT	7.27603e-07	0.270686	1.94479e-15	0.294345	2.56325e-08	0.302793	5.43457e-06	0.171031	6.01833e-08	0.294974	5.73475e-15	0.289555	0.413414	0.0455208	0.0129309	0.0939766
GO_POSITIVE_REGULATION_OF_SEQUESTERING_OF_CALCIUM_ION	0.00765096	0.147701	0.0669115	0.0693434	0.539445	0.034161	4.98431e-10	0.232434	0.00655168	0.150532	3.36974e-09	0.22125	0.029235	0.120963	2.82445e-05	0.157664
GO_SECONDARY_METABOLITE_BIOSYNTHETIC_PROCESS	3.22285e-05	0.22842	0.985729	-0.000677748	2.48319e-05	0.231585	0.00657029	0.102711	0.0027595	0.165531	0.0328766	0.0807124	0.00548725	0.153713	0.000193204	0.140547
GO_CELL_MIGRATION_INVOLVED_IN_HEART_DEVELOPMENT	0.130635	0.084024	0.954969	0.00213966	0.547096	0.0335193	5.10872e-05	0.152583	0.0950185	0.0927648	0.000665892	0.128419	0.482985	0.0390484	0.145246	0.0551478
GO_PROTEIN_LOCALIZATION_TO_CYTOSKELETON	0.196053	-0.0719002	0.317135	0.0378914	0.250822	-0.0638803	0.00490107	-0.106304	0.0761627	-0.0985106	0.207186	-0.0477666	0.00146054	-0.175829	0.0493343	-0.0743794
GO_NUCLEAR_ENVELOPE_REASSEMBLY	0.107608	0.0894191	0.490934	0.026096	0.431665	0.0437663	6.32331e-10	0.231072	0.466403	0.0405409	1.02755e-06	0.183572	0.591238	-0.0298983	0.0115069	0.0955291
GO_INTRINSIC_APOPTOTIC_SIGNALING_PATHWAY_IN_RESPONSE_TO_DNA_DAMAGE_BY_P53_CLASS_MEDIATOR	5.34879e-09	0.316576	4.96295e-24	0.369462	2.01567e-12	0.377098	4.49705e-17	0.310363	7.15058e-11	0.351291	1.09563e-25	0.381864	0.322853	0.0550087	0.00146744	0.120097
GO_REGULATION_OF_AUTOPHAGY	0.88722	0.00789722	0.363671	0.03441	0.0473398	0.1101	0.133585	-0.0567954	0.746755	-0.0179802	0.629306	-0.0182887	0.0232417	-0.12587	0.000130116	-0.144223
GO_PHOSPHOLIPID_METABOLIC_PROCESS	0.16706	-0.0768264	0.105242	0.0613243	0.258273	-0.0628881	0.346388	-0.0356678	0.0317946	-0.119128	0.728546	0.01315	0.0059336	-0.152317	0.591409	-0.0203377
GO_AMMONIUM_ION_METABOLIC_PROCESS	0.225137	0.0674674	2.40073e-05	0.159031	0.235009	0.0660562	0.0979957	0.0626352	0.320168	0.0553144	0.00265912	0.113481	0.931591	-0.00478009	0.0316414	0.0812902
GO_REGULATION_OF_INTERLEUKIN_4_PRODUCTION	4.23261e-27	0.550084	1.85501e-57	0.553921	4.12321e-39	0.641722	2.39005e-75	0.619604	3.6615e-40	0.648477	3.30986e-96	0.680501	9.16454e-16	0.426057	8.79861e-42	0.481136
GO_NCRNA_CATABOLIC_PROCESS	0.325148	-0.0547488	0.00121655	-0.122118	0.184085	-0.0738637	0.146385	-0.0549924	0.953206	-0.0032676	0.000915739	-0.125124	0.188392	0.0731466	0.665372	-0.0163872
GO_REGULATION_OF_FAT_CELL_DIFFERENTIATION	2.6018e-08	0.302658	7.8312e-32	0.423756	1.97458e-10	0.343499	4.26064e-16	0.300922	1.30801e-08	0.308798	1.79246e-33	0.434003	0.417716	0.0451033	3.05534e-08	0.207561
GO_GLUTAMINE_FAMILY_AMINO_ACID_BIOSYNTHETIC_PROCESS	0.0264056	-0.12316	0.000366943	-0.134386	0.0402535	-0.113845	2.98665e-09	-0.221974	0.000214629	-0.203927	3.06285e-06	-0.175449	0.00116204	-0.179396	0.0103973	-0.0968616
GO_REGULATION_OF_PROTEIN_ACTIVATION_CASCADE	5.65792e-25	0.530366	6.89327e-50	0.520964	3.57005e-39	0.642129	6.28461e-76	0.621498	1.55786e-39	0.644458	1.02564e-101	0.694437	2.20651e-13	0.392017	1.55215e-35	0.446408
GO_REGULATION_OF_TELOMERASE_RNA_LOCALIZATION_TO_CAJAL_BODY	0.332621	0.0539106	0.0536253	-0.0730269	0.547213	-0.0335094	2.31126e-09	0.223503	0.798283	-0.0142306	0.000181425	0.141138	0.0932481	-0.0932632	0.35481	0.03505
GO_REGULATION_OF_RNA_STABILITY	1.41314e-06	0.263802	0.000157547	0.142455	1.72819e-05	0.235912	6.85719e-14	0.278206	5.38806e-07	0.27374	1.99453e-14	0.283919	0.0330154	0.118297	2.40543e-05	0.159014
GO_BUNDLE_OF_HIS_CELL_TO_PURKINJE_MYOCYTE_COMMUNICATION	0.0279465	0.12194	0.329435	0.036941	0.0323947	0.118716	0.183332	-0.0503849	0.00278714	0.165365	0.8486	-0.00723356	0.39055	0.0477846	0.00298078	-0.112171
GO_REGULATION_OF_CELL_MATURATION	1.56238e-08	-0.307225	2.06499e-05	-0.160287	6.26111e-11	-0.352294	6.61286e-17	-0.308768	2.95394e-13	-0.390092	9.03716e-15	-0.287513	8.04525e-07	-0.269656	5.42198e-05	-0.152064
GO_NEGATIVE_REGULATION_OF_CELL_DEVELOPMENT	2.26423e-06	-0.258794	1.05926e-05	-0.165744	5.08956e-07	-0.274315	1.40989e-20	-0.341712	5.48665e-07	-0.273556	7.23662e-16	-0.298646	4.45174e-05	-0.224436	1.87469e-06	-0.179145
GO_MAMMARY_GLAND_MORPHOGENESIS	1.2766e-08	0.309012	3.1364e-25	0.378496	3.10781e-13	0.389756	1.62875e-09	0.225573	1.42709e-08	0.308028	2.4347e-23	0.364127	0.342912	0.0527759	1.89573e-09	0.224678
GO_CELLULAR_PROTEIN_COMPLEX_DISASSEMBLY	0.970042	0.0020913	4.2994e-06	-0.172849	0.116645	-0.0872033	6.98837e-06	0.169058	0.935946	0.00447512	0.300874	0.0391858	0.428514	0.0440661	0.509602	0.0249838
GO_REGULATION_OF_CYTOKINE_PRODUCTION_INVOLVED_IN_INFLAMMATORY_RESPONSE	2.18576e-20	0.482856	1.06013e-49	0.520103	4.72903e-23	0.511354	3.06238e-65	0.584354	3.60988e-25	0.532231	3.19415e-82	0.641254	1.38944e-06	0.26398	2.27626e-30	0.414308
GO_URETER_DEVELOPMENT	0.783604	0.0152915	0.491121	0.0260847	0.040184	-0.113885	0.0117694	-0.0952305	0.545179	0.0336796	0.242494	-0.0442647	0.0390901	0.114512	0.871208	0.00614305
GO_BODY_MORPHOGENESIS	0.0609261	0.104071	0.000319954	0.135724	0.166612	0.0769073	0.0393297	-0.0779645	0.0151273	0.134659	0.479372	0.0267962	0.489719	-0.0384502	0.011165	-0.0959271
GO_SOMATIC_STEM_CELL_POPULATION_MAINTENANCE	0.0105965	-0.141597	0.309441	-0.0384983	0.00701314	-0.149296	0.000676883	-0.128252	0.0115715	-0.139909	0.0229633	-0.0860068	0.612204	-0.0282226	0.453534	-0.0283952
GO_CYTOPLASMIC_MICROTUBULE_ORGANIZATION	1.33604e-06	-0.264392	1.22035e-14	-0.286156	3.20972e-08	-0.300755	2.79926e-43	-0.488899	2.37123e-09	-0.323463	1.27826e-39	-0.469561	1.28596e-09	-0.328531	1.1015e-24	-0.374422
GO_POSITIVE_REGULATION_OF_DNA_DAMAGE_RESPONSE_SIGNAL_TRANSDUCTION_BY_P53_CLASS_MEDIATOR	1.6116e-09	0.326672	2.31154e-06	0.177577	7.66477e-12	0.367708	1.00857e-06	0.183708	1.1605e-09	0.329372	3.7382e-08	0.206262	0.249318	0.0640831	0.0983611	0.0625673
GO_PROTEIN_ACTIVATION_CASCADE	2.91648e-22	0.50318	4.33103e-47	0.507801	1.15722e-29	0.572239	4.31504e-61	0.568525	5.57432e-30	0.574869	3.35847e-84	0.647176	2.79098e-09	0.322097	8.60637e-39	0.465008
GO_POSITIVE_REGULATION_OF_PHOSPHOLIPASE_ACTIVITY	8.92794e-08	0.29128	4.66622e-27	0.39174	2.43382e-11	0.359331	4.08691e-19	0.32907	3.63745e-08	0.299615	8.83131e-33	0.42972	0.110528	0.0886876	6.09894e-09	0.217654
GO_NEGATIVE_REGULATION_OF_PEPTIDYL_TYROSINE_PHOSPHORYLATION	2.50107e-11	0.35913	4.95356e-18	0.319305	1.21681e-18	0.462632	5.62735e-17	0.309437	1.56115e-12	0.378861	9.25834e-27	0.389624	0.559852	0.0324589	5.94957e-11	0.244233
GO_REGULATION_OF_COLLATERAL_SPROUTING	7.62388e-12	-0.367746	6.90066e-05	-0.149942	8.34332e-14	-0.398344	2.7389e-13	-0.271636	7.75704e-15	-0.413255	3.04481e-11	-0.247827	3.65941e-05	-0.226862	4.03151e-08	-0.205773
GO_ESTABLISHMENT_OR_MAINTENANCE_OF_MONOPOLAR_CELL_POLARITY	0.074654	0.0990184	0.0433719	0.0764326	0.287861	0.0591313	0.00555582	-0.10478	0.000736374	0.186324	0.626872	-0.0184187	0.00189263	0.171702	0.0866169	0.0648591
GO_NEURON_RECOGNITION	6.65341e-12	-0.368717	1.09839e-14	-0.286632	1.20182e-11	-0.364476	3.41565e-21	-0.346866	6.24142e-15	-0.414583	5.805e-23	-0.361169	3.50811e-10	-0.338992	9.31182e-19	-0.325886
GO_NUCLEOSIDE_DIPHOSPHATE_METABOLIC_PROCESS	0.00569081	0.153064	0.00215542	0.115856	0.030385	0.120122	3.40657e-12	0.259197	0.144119	0.0811998	5.62092e-12	0.256646	0.205171	-0.0704621	6.38636e-07	0.187
GO_MICROTUBULE_POLYMERIZATION_OR_DEPOLYMERIZATION	0.297146	-0.0580064	2.25418e-11	-0.249421	0.468968	-0.0403081	4.26513e-20	-0.337619	0.161845	-0.0777788	2.05125e-22	-0.356815	0.0131581	-0.137412	5.62605e-14	-0.27913
GO_RESPONSE_TO_AMMONIUM_ION	0.191303	-0.0726688	0.0131713	-0.0937296	0.100672	-0.0912213	0.00120839	-0.12219	0.0191742	-0.129868	0.0162627	-0.0908631	0.000185193	-0.205936	0.000243556	-0.138352
GO_REGULATION_OF_INTERLEUKIN_5_PRODUCTION	0.0476622	0.109941	2.82999e-14	0.282314	0.00650273	0.150668	0.000712795	0.127722	0.295202	0.0582399	6.41932e-09	0.217341	0.483083	-0.0390396	7.89705e-06	0.168091
GO_REGULATION_OF_GLUCOSE_IMPORT	0.63716	-0.0262604	0.878187	0.00580745	0.8725	0.00893627	0.000262378	-0.137639	0.0932775	-0.0932548	0.0716985	-0.0681639	5.35029e-05	-0.222136	4.1819e-05	-0.154317
GO_NEGATIVE_REGULATION_OF_PROTEOLYSIS	7.0258e-18	0.453371	9.84408e-35	0.441644	1.33711e-22	0.506711	4.07962e-52	0.531047	4.48902e-19	0.467776	1.71345e-66	0.588966	0.00125872	0.178157	5.06117e-19	0.328246
GO_PINOCYTOSIS	1.47692e-22	0.506263	3.50797e-49	0.517694	1.87365e-34	0.609606	1.35429e-45	0.500525	1.3791e-23	0.516769	1.39485e-73	0.613754	1.11355e-06	0.266295	1.30281e-25	0.381312
GO_REGULATION_OF_EPITHELIAL_CELL_APOPTOTIC_PROCESS	5.86328e-16	0.428667	1.70092e-28	0.401755	5.84136e-22	0.5	1.62672e-36	0.452126	1.71917e-16	0.435721	1.6061e-50	0.523862	0.129358	0.0843029	2.22331e-11	0.249494
GO_PHOSPHATIDYLETHANOLAMINE_METABOLIC_PROCESS	0.593447	0.0297205	0.00195804	0.116929	0.562648	0.0322282	0.910472	-0.00426058	0.915678	0.00589581	0.33768	0.0363166	0.296644	0.0580666	0.113199	0.0599649
GO_PHOSPHATIDYLCHOLINE_METABOLIC_PROCESS	7.09793e-06	0.246205	1.99e-12	0.261905	1.97176e-07	0.283697	6.4869e-06	0.169644	2.20749e-06	0.259066	3.57344e-09	0.220897	0.00641019	0.150927	1.06145e-06	0.183336
GO_LUNG_EPITHELIUM_DEVELOPMENT	5.1621e-06	-0.249781	8.47128e-14	-0.277214	4.49855e-12	-0.371491	2.37897e-27	-0.393805	2.58997e-10	-0.341381	1.23762e-25	-0.381476	9.68061e-09	-0.311441	1.19535e-05	-0.164769
GO_METENCEPHALON_DEVELOPMENT	6.81098e-25	-0.529593	7.45113e-27	-0.390296	5.52489e-29	-0.566531	3.70024e-59	-0.560845	3.8662e-33	-0.599828	7.70401e-60	-0.563575	6.61897e-16	-0.427961	1.04259e-34	-0.441494
GO_G_PROTEIN_COUPLED_PURINERGIC_NUCLEOTIDE_RECEPTOR_SIGNALING_PATHWAY	1.30318e-08	0.30883	9.26717e-68	0.593557	5.0564e-14	0.40155	9.04953e-45	0.496434	1.02696e-10	0.348538	7.1818e-71	0.604527	0.00159949	0.174392	2.12388e-25	0.379749
GO_ACTIN_FILAMENT_BUNDLE_ORGANIZATION	0.000422609	0.194442	1.1234e-12	0.264752	0.000247231	0.201983	2.84388e-10	0.23561	5.45802e-05	0.221885	4.02878e-18	0.320127	0.942603	0.00400923	6.21793e-05	0.150862
GO_CELLULAR_RESPONSE_TO_VIRUS	1.26174e-15	0.424175	3.28618e-45	0.498623	1.15429e-21	0.496849	2.84616e-36	0.450718	2.34578e-22	0.50417	3.01219e-55	0.544668	1.02821e-09	0.330361	2.16738e-28	0.401033
GO_CYTOPLASMIC_MRNA_PROCESSING_BODY_ASSEMBLY	0.133041	-0.0835042	0.200279	-0.048501	0.0664183	-0.101948	0.00753028	-0.101003	0.41377	-0.0454862	0.0105829	-0.0966301	0.241865	-0.0651007	0.0496953	-0.0742619
GO_RESPIRATORY_GASEOUS_EXCHANGE	0.650374	-0.0252346	6.1693e-05	0.150931	0.813915	-0.0131064	0.0984408	0.0625525	0.186411	-0.073475	0.0201187	0.0878936	0.00324541	-0.162812	0.622048	0.0186769
GO_NEGATIVE_REGULATION_OF_PROTEIN_MODIFICATION_BY_SMALL_PROTEIN_CONJUGATION_OR_REMOVAL	5.85943e-05	0.22099	0.00429976	0.107875	0.000909758	0.183143	1.89393e-25	0.380116	2.15777e-05	0.233272	1.87827e-20	0.340657	0.0316306	0.119242	3.41829e-08	0.206839
GO_AMINO_ACID_ACTIVATION	0.183378	-0.0739826	0.0100168	-0.0973476	0.0353357	-0.116786	0.143972	0.0553227	0.00296381	-0.164338	0.944071	-0.0026582	0.00573057	-0.15294	0.113493	-0.0599161
GO_DENDRITIC_CELL_DIFFERENTIATION	1.58408e-28	0.562622	3.3608e-76	0.622382	5.74636e-47	0.688408	1.51063e-76	0.623506	1.36442e-38	0.638319	1.9198e-114	0.723841	2.76162e-11	0.3584	3.7267e-37	0.455803
GO_NATURAL_KILLER_CELL_DIFFERENTIATION	6.03338e-09	0.315541	1.62121e-44	0.495167	6.29256e-14	0.400154	4.87517e-44	0.49276	2.87886e-12	0.374622	3.6356e-59	0.560876	9.49599e-07	0.267948	2.51249e-16	0.30317
GO_BONE_TRABECULA_MORPHOGENESIS	0.0762659	0.0984762	5.58282e-06	0.170821	0.00225	0.168897	0.020435	0.0876728	0.0236137	0.125535	0.000304584	0.136201	0.204853	-0.0705115	0.0247256	0.0849373
GO_REGULATION_OF_INFLAMMATORY_RESPONSE_TO_ANTIGENIC_STIMULUS	2.88354e-26	0.54251	7.01229e-49	0.516291	1.17879e-40	0.651581	3.39613e-80	0.635048	2.43743e-41	0.655839	6.33947e-96	0.679765	5.85956e-16	0.42867	2.12993e-39	0.468349
GO_REGULATION_OF_PROTEASOMAL_UBIQUITIN_DEPENDENT_PROTEIN_CATABOLIC_PROCESS	0.78977	-0.0148452	0.785925	-0.0102912	0.871447	0.00901074	1.69822e-06	0.17988	0.294583	-0.0583144	0.000289286	0.1367	0.000602513	-0.189295	0.0732756	-0.0677894
GO_NEGATIVE_REGULATION_OF_NEURON_DIFFERENTIATION	1.07638e-13	-0.3967	8.45757e-14	-0.277222	1.35009e-12	-0.379858	1.87695e-30	-0.414857	2.02837e-14	-0.407311	1.4888e-28	-0.40215	3.46232e-09	-0.32028	5.68213e-19	-0.3278
GO_REGULATION_OF_SKELETAL_MUSCLE_TISSUE_DEVELOPMENT	0.0585654	-0.105033	0.776372	0.0107627	0.165318	-0.077142	7.7015e-05	-0.148967	0.0924321	-0.0934954	0.00469402	-0.106824	0.0132391	-0.137292	0.0034893	-0.110342
GO_MUSCLE_TISSUE_DEVELOPMENT	0.0264791	0.1231	0.260878	0.0425825	0.0369697	0.115773	0.493285	-0.0259547	0.0566333	0.105844	0.167715	0.0522385	0.0294916	-0.120773	0.887607	0.00535525
GO_NEGATIVE_REGULATION_OF_PROTEIN_AUTOPHOSPHORYLATION	2.31502e-20	0.482577	3.48291e-31	0.419609	9.13975e-24	0.518555	1.64022e-35	0.446267	1.03281e-28	0.564216	1.38799e-55	0.546096	1.67153e-07	0.285297	8.50284e-15	0.287788
GO_ACID_SECRETION	9.69454e-06	-0.24265	1.59434e-19	-0.332664	2.70094e-09	-0.322372	1.46671e-21	-0.349894	1.89391e-08	-0.305511	3.79657e-24	-0.370351	0.000113475	-0.212473	2.54124e-13	-0.271996
GO_POSITIVE_REGULATION_OF_ADAPTIVE_IMMUNE_RESPONSE	1.96088e-33	0.602051	1.08658e-72	0.610754	1.14287e-47	0.692188	9.84818e-76	0.620863	3.30062e-46	0.684252	9.08446e-112	0.717961	5.85848e-15	0.414969	1.19297e-35	0.447081
GO_REGULATION_OF_OSTEOCLAST_DIFFERENTIATION	9.88328e-15	0.411768	7.57014e-63	0.575329	1.2376e-28	0.563543	3.3286e-42	0.483345	7.79182e-19	0.464942	3.94014e-72	0.608855	0.000406143	0.19501	1.34871e-21	0.350192
GO_REGULATION_OF_PROTEIN_BINDING	2.92227e-06	0.256039	9.32923e-08	0.200261	3.76733e-09	0.319565	2.3418e-09	0.223425	4.81181e-06	0.250563	1.74391e-15	0.294823	0.993033	0.000486213	1.92451e-05	0.160872
GO_CARDIAC_SEPTUM_DEVELOPMENT	0.710199	-0.0206895	0.0137827	0.0931187	0.80771	-0.013552	0.172338	-0.0516768	0.360152	-0.0509225	0.448397	0.0287191	0.00779484	-0.147357	0.0754656	-0.0672801
GO_REGULATION_OF_ICOSANOID_SECRETION	0.00533169	0.154223	1.35823e-12	0.263811	0.0266235	0.122983	9.48799e-12	0.253949	0.0709697	0.100294	1.43812e-16	0.305525	0.40639	-0.0462081	3.51513e-06	0.174398
GO_L_ALPHA_AMINO_ACID_TRANSMEMBRANE_TRANSPORT	5.7585e-06	-0.248559	1.17547e-09	-0.227485	7.62714e-08	-0.292761	1.28385e-17	-0.315482	2.96683e-11	-0.35787	1.44184e-20	-0.341629	1.09364e-08	-0.310373	7.04147e-16	-0.298764
GO_REGULATION_OF_HISTONE_METHYLATION	0.00105694	-0.180856	0.0361731	-0.0792565	0.00797595	-0.146933	3.49495e-10	-0.234448	0.00108418	-0.180465	1.92443e-08	-0.210508	0.00804632	-0.146771	0.00146688	-0.120102
GO_POSITIVE_REGULATION_OF_MITOCHONDRIAL_FISSION	0.0411695	-0.113331	3.83294e-24	-0.37032	0.0652739	-0.102378	1.7552e-26	-0.387635	0.00320115	-0.163043	1.41289e-31	-0.422123	0.00978239	-0.143116	5.83044e-21	-0.344933
GO_ANTIMICROBIAL_HUMORAL_RESPONSE	1.72231e-12	0.378184	2.2032e-15	0.293797	3.10283e-13	0.389766	1.68524e-41	0.47965	1.16149e-14	0.410773	1.18978e-41	0.480447	1.47058e-05	0.237814	6.10824e-16	0.299377
GO_EPIDERMIS_MORPHOGENESIS	0.000642647	0.188345	3.30934e-09	0.221358	0.00487148	0.155816	7.96482e-13	0.266448	0.000307832	0.198932	3.41127e-15	0.291868	0.0875003	0.0949351	3.35525e-09	0.221276
GO_INTERMEDIATE_FILAMENT_BASED_PROCESS	0.000816923	0.184769	0.673598	0.0159594	0.000179725	0.206342	0.0425192	-0.0767454	0.000138043	0.209881	0.484425	-0.0264891	0.320194	0.0553114	0.0165643	-0.0906097
GO_COGNITION	1.83718e-10	-0.344059	5.02751e-17	-0.309903	5.51071e-11	-0.353255	2.81203e-29	-0.407057	6.19108e-14	-0.400258	1.22235e-28	-0.402735	1.85158e-11	-0.361335	3.61774e-24	-0.370511
GO_RESPONSE_TO_ZINC_ION	1.02188e-06	0.267188	6.66195e-08	0.202492	6.46927e-07	0.271885	8.8045e-12	0.254336	0.00108428	0.180464	7.03176e-13	0.267059	0.310929	0.0563788	0.0324968	0.0808881
GO_PURINE_DEOXYRIBONUCLEOTIDE_METABOLIC_PROCESS	4.9021e-08	0.296874	0.000911493	0.125172	5.75269e-10	0.335056	1.92775e-21	0.348918	1.12809e-10	0.34782	2.81783e-15	0.292713	0.00011402	0.21241	1.97247e-14	0.28397
GO_DISRUPTION_OF_CELLS_OF_OTHER_ORGANISM	1.19481e-09	0.329134	0.000136223	0.143801	6.03609e-10	0.33467	1.25357e-22	0.358522	1.96603e-11	0.360897	3.38077e-23	0.363013	0.000677381	0.187566	8.53594e-08	0.200852
GO_AXIS_SPECIFICATION	0.000132511	-0.210425	0.00256808	-0.113878	2.06137e-07	-0.283265	1.06989e-12	-0.264993	1.15113e-06	-0.265949	3.31322e-09	-0.221351	0.00364049	-0.160861	6.1517e-05	-0.150956
GO_PHOSPHATIDYLINOSITOL_METABOLIC_PROCESS	0.706244	0.0209855	1.56848e-06	0.180469	0.0996177	0.0915039	0.265857	0.0421412	0.653664	-0.0249806	0.000307618	0.136105	0.0508806	-0.108403	0.734511	0.0128496
GO_CELL_PART_MORPHOGENESIS	7.00627e-12	-0.368349	1.14275e-07	-0.198905	4.63743e-12	-0.371276	2.7003e-35	-0.444988	1.84666e-14	-0.407896	3.99129e-27	-0.39222	3.10298e-10	-0.339961	1.27296e-17	-0.315516
GO_PIGMENT_GRANULE_LOCALIZATION	0.00104636	0.18101	0.728463	-0.0131542	0.00125118	0.17825	0.00419	0.108183	4.45299e-05	0.224432	0.0121839	0.094771	0.0832918	0.0962161	0.0372956	-0.0787864
GO_VASCULAR_ENDOTHELIAL_GROWTH_FACTOR_SIGNALING_PATHWAY	9.67728e-13	0.382131	4.88109e-11	0.245301	2.33852e-13	0.391634	6.17906e-17	0.309049	1.23176e-15	0.424317	1.5347e-19	0.332808	0.064364	0.102724	0.00115164	0.122703
GO_RESPONSE_TO_ORGANOPHOSPHORUS	0.000320686	0.198358	4.40391e-07	0.189635	0.000226815	0.20317	2.10529e-05	0.160127	0.000359245	0.196756	1.44031e-10	0.239401	0.203138	-0.0707787	0.903807	0.00457929
GO_AXO_DENDRITIC_TRANSPORT	0.000997725	-0.181739	8.02665e-19	-0.326463	0.00496385	-0.155486	3.75e-23	-0.36266	0.0017941	-0.172561	6.43296e-29	-0.404631	8.37176e-05	-0.216434	8.40071e-26	-0.382708
GO_SINGLE_ORGANISM_MEMBRANE_FUSION	0.0629206	-0.103282	0.0640249	-0.0700886	0.135008	-0.0830846	0.013784	-0.0931175	0.0115066	-0.140017	0.0045542	-0.107187	0.00363372	-0.160892	3.94881e-07	-0.190402
GO_REGULATION_OF_PROTEIN_UBIQUITINATION_INVOLVED_IN_UBIQUITIN_DEPENDENT_PROTEIN_CATABOLIC_PROCESS	4.17631e-05	0.225229	0.0076731	0.100766	0.000505074	0.191871	3.30092e-27	0.392803	3.72385e-05	0.226647	6.13111e-21	0.344751	0.101483	0.0910057	2.22947e-06	0.177849
GO_SKELETAL_MUSCLE_TISSUE_REGENERATION	7.84945e-11	0.350584	2.04156e-15	0.294132	1.53267e-07	0.286132	2.0711e-23	0.364674	2.24675e-07	0.282426	1.93227e-32	0.427594	0.000276009	0.200456	1.6276e-14	0.284847
GO_POLYSACCHARIDE_BIOSYNTHETIC_PROCESS	2.29973e-13	0.391744	3.46464e-15	0.291799	4.25048e-14	0.402654	4.76288e-23	0.361845	1.46619e-13	0.394692	4.45821e-30	0.412387	0.0225173	0.126535	9.86861e-13	0.265392
GO_REGULATION_OF_TYROSINE_PHOSPHORYLATION_OF_STAT_PROTEIN	1.63538e-24	0.525915	5.65491e-54	0.539204	1.45811e-33	0.603015	1.18536e-57	0.554721	1.55385e-32	0.595219	1.47867e-92	0.670819	6.95627e-10	0.333528	1.33283e-33	0.434792
GO_ORGAN_REGENERATION	6.06358e-21	0.489036	2.28249e-43	0.489353	2.99938e-27	0.551424	1.14901e-61	0.570769	1.49867e-24	0.526283	1.72912e-80	0.635955	0.000910547	0.18313	1.45504e-21	0.349922
GO_GLAND_MORPHOGENESIS	0.000107295	0.213208	4.14171e-26	0.384944	8.45072e-07	0.269151	1.75835e-09	0.225122	2.37171e-05	0.232138	1.54051e-21	0.349719	0.869417	-0.00915428	2.2436e-07	0.194325
GO_NEGATIVE_REGULATION_OF_ADAPTIVE_IMMUNE_RESPONSE	8.19678e-24	0.519026	5.24172e-72	0.608432	5.21455e-37	0.62769	1.30117e-70	0.603633	4.26572e-38	0.635038	7.3957e-112	0.71816	2.18569e-10	0.342707	6.98393e-43	0.48686
GO_REGULATION_OF_SYSTEMIC_ARTERIAL_BLOOD_PRESSURE_BY_CIRCULATORY_RENIN_ANGIOTENSIN	4.19327e-12	0.371986	1.02279e-16	0.306952	1.7345e-14	0.408287	3.16837e-27	0.392928	4.60106e-13	0.387144	1.54913e-30	0.415402	0.125046	0.0852608	2.66922e-06	0.176492
GO_RIBOSOME_BIOGENESIS	0.933495	-0.0046468	1.72299e-05	-0.161785	0.45712	-0.0413892	0.221439	0.0463052	0.888152	-0.00783155	0.383248	-0.0330294	0.820673	-0.012622	0.998856	-5.43e-05
GO_B_CELL_HOMEOSTASIS	3.57937e-07	0.277838	2.41111e-36	0.451136	3.31657e-17	0.444932	4.1081e-13	0.269679	2.10123e-09	0.324471	1.18293e-29	0.409575	0.107265	0.089506	9.181e-11	0.241875
GO_IRE1_MEDIATED_UNFOLDED_PROTEIN_RESPONSE	8.56749e-16	0.426452	2.06149e-13	0.272999	8.96239e-18	0.452063	2.27319e-25	0.379531	1.94529e-16	0.435018	2.64154e-30	0.413884	0.040823	0.113525	2.87777e-07	0.192607
GO_SINGLE_ORGANISM_BEHAVIOR	1.30118e-12	-0.380111	1.06676e-20	-0.342733	1.78368e-12	-0.377943	2.72862e-35	-0.444961	5.63028e-16	-0.428903	1.774e-35	-0.446066	5.55412e-12	-0.37	1.07491e-27	-0.396222
GO_POSITIVE_REGULATION_OF_CALCIUM_ION_DEPENDENT_EXOCYTOSIS	2.87004e-08	-0.301771	9.97875e-27	-0.389392	1.25073e-11	-0.364187	1.77014e-26	-0.387609	1.56655e-15	-0.422894	1.25339e-32	-0.428771	8.64359e-11	-0.349852	4.49664e-21	-0.345873
GO_POSITIVE_REGULATION_OF_ENDOCYTOSIS	4.06645e-21	0.490936	1.04865e-64	0.582362	4.61753e-35	0.614018	1.33879e-49	0.519634	6.41226e-27	0.548461	2.08709e-86	0.65363	2.255e-06	0.258837	2.44667e-23	0.36411
GO_MRNA_SPLICE_SITE_SELECTION	3.27457e-08	-0.300573	3.89776e-13	-0.269933	1.18696e-08	-0.309653	4.7054e-26	-0.384542	6.64856e-07	-0.271607	3.04022e-27	-0.393055	0.019356	-0.129674	5.86719e-07	-0.187604
GO_REGULATION_OF_TRANSLATION_IN_RESPONSE_TO_STRESS	1.76037e-11	0.361704	4.15586e-32	0.4255	1.25071e-14	0.410316	1.14444e-46	0.505765	2.37291e-12	0.375967	3.66545e-62	0.572694	0.0137114	0.136604	3.3192e-15	0.291989
GO_NEGATIVE_REGULATION_OF_GENE_EXPRESSION	0.654384	0.024925	0.0333289	0.0805055	0.378396	0.0490206	0.629802	-0.0182623	0.850166	0.0105189	0.177778	0.0510301	0.147277	-0.0805677	0.963615	-0.00172849
GO_PHENOL_CONTAINING_COMPOUND_BIOSYNTHETIC_PROCESS	0.00604381	0.151987	0.730792	-0.0130368	0.0274991	0.122288	0.967641	-0.00153715	0.0147875	0.135111	0.383329	0.0330238	0.157438	0.0786017	0.702809	0.0144559
GO_POSITIVE_REGULATION_OF_ERYTHROCYTE_DIFFERENTIATION	0.0124269	0.138528	0.00621349	0.103404	0.00310415	0.163562	0.783564	0.0104076	0.130073	0.0841465	0.0395262	0.077887	0.0618378	-0.103708	0.503409	-0.0253504
GO_DENDRITIC_CELL_MIGRATION	1.29724e-20	0.485386	1.51757e-60	0.566375	6.42815e-31	0.582509	2.4264e-71	0.606153	4.49629e-27	0.549849	1.35273e-96	0.68151	1.19158e-07	0.288543	1.63712e-26	0.387852
GO_SENSORY_PERCEPTION_OF_TEMPERATURE_STIMULUS	0.444541	0.0425543	3.10144e-14	-0.281892	0.507308	-0.0369082	2.83045e-09	-0.222295	0.456426	-0.041453	6.40006e-13	-0.26752	0.00628262	-0.15129	0.000241404	-0.138437
GO_LYSOSOMAL_TRANSPORT	0.00266431	-0.166114	0.0415019	-0.0771256	0.0953823	-0.0926633	4.81836e-18	-0.319415	0.00116288	-0.179385	4.83789e-14	-0.279833	0.00134668	-0.177103	8.12715e-14	-0.277409
GO_CELLULAR_CATABOLIC_PROCESS	0.0118729	0.139412	0.0547306	0.0726932	0.00338067	0.162121	2.50953e-10	0.236312	0.18868	0.0730991	6.61607e-09	0.217156	0.535563	-0.0344883	0.0061937	0.103443
GO_POSITIVE_REGULATION_OF_DNA_BIOSYNTHETIC_PROCESS	0.21123	0.069532	0.510755	-0.0249158	0.385168	0.048329	8.39864e-05	0.148193	0.795796	-0.0144099	0.00161987	0.11902	0.00139598	-0.176539	0.707774	-0.0142027
GO_POSITIVE_REGULATION_OF_MACROPHAGE_ACTIVATION	2.6223e-19	0.470513	7.22856e-32	0.423977	1.20779e-27	0.554933	8.89774e-42	0.48111	1.84861e-20	0.483671	1.36832e-56	0.550323	0.000160671	0.207852	4.38779e-24	0.369872
GO_REGULATION_OF_CALCIUM_MEDIATED_SIGNALING	2.55015e-07	0.281186	1.56714e-12	0.263099	6.75149e-10	0.333769	2.00213e-14	0.283901	2.01979e-08	0.304935	1.51195e-19	0.332865	0.0686605	0.101122	5.48032e-07	0.188089
GO_REGULATION_OF_ALPHA_BETA_T_CELL_ACTIVATION	3.8249e-32	0.592195	9.41125e-82	0.639829	3.32618e-49	0.700265	2.73968e-77	0.625892	2.61401e-49	0.700805	2.03304e-120	0.736445	8.42083e-16	0.426553	9.05671e-42	0.48107
GO_MUSCLE_ORGAN_DEVELOPMENT	0.0393043	0.114388	0.00624096	0.103349	0.00831011	0.146173	0.128951	-0.057481	0.0117461	0.13962	0.405793	0.031492	0.985278	-0.00102752	0.0130367	0.0938674
GO_POSITIVE_REGULATION_OF_HEMOPOIESIS	1.46171e-28	0.562922	3.07602e-71	0.605798	3.30191e-43	0.667117	5.77489e-70	0.601378	2.12801e-40	0.649968	5.27323e-112	0.718486	1.13211e-09	0.329575	1.48894e-30	0.415515
GO_OUTFLOW_TRACT_SEPTUM_MORPHOGENESIS	0.467459	0.040445	6.3936e-06	-0.169758	0.147802	0.0804638	0.0260772	-0.0841608	0.643672	0.0257538	0.00105924	-0.123591	0.0121268	-0.139002	0.00138769	-0.120703
GO_REGULATION_OF_MAMMARY_GLAND_EPITHELIAL_CELL_PROLIFERATION	0.00479282	0.156102	8.81945e-09	0.215387	0.000557941	0.190421	7.2169e-09	0.216623	0.000246046	0.202049	2.15781e-10	0.237156	0.00380315	0.160113	0.00103619	0.123824
GO_REGULATION_OF_PHOSPHATIDYLINOSITOL_3_KINASE_ACTIVITY	0.00817879	0.146468	9.13037e-15	0.287467	0.00137948	0.176726	0.0152421	0.091752	0.0651922	0.102409	6.08376e-08	0.203089	0.184546	-0.0737864	0.073345	0.0677731
GO_CELLULAR_RESPONSE_TO_EPIDERMAL_GROWTH_FACTOR_STIMULUS	0.348324	0.052188	0.529756	0.0238067	0.227203	0.0671685	0.0951051	-0.0631797	0.295251	0.058234	0.868207	-0.00628748	0.205711	-0.0703785	0.275374	-0.0413131
GO_LEUKOCYTE_DEGRANULATION	4.85505e-17	0.442824	6.2226e-49	0.516534	2.2087e-24	0.524642	3.86341e-42	0.483007	4.77357e-24	0.521354	6.29598e-68	0.59416	3.63891e-09	0.319859	1.34787e-28	0.402445
GO_MYELOID_CELL_HOMEOSTASIS	6.36061e-15	0.414468	1.40735e-38	0.463822	4.71028e-28	0.558522	1.76055e-31	0.421512	8.5224e-25	0.528656	3.83056e-53	0.535584	0.000299716	0.199307	1.78306e-22	0.357302
GO_REGULATION_OF_BLOOD_PRESSURE	4.28362e-10	0.337409	3.85497e-16	0.301349	7.71298e-10	0.332695	7.69586e-20	0.335412	6.86231e-09	0.314431	1.97671e-27	0.39437	0.0327843	0.118452	2.96925e-08	0.207745
GO_REGULATION_OF_MORPHOGENESIS_OF_A_BRANCHING_STRUCTURE	0.000121645	0.211557	8.3928e-05	0.148199	2.90096e-05	0.229702	0.000141963	0.14342	2.3521e-08	0.303568	1.51065e-07	0.197023	0.015727	0.133883	0.0309311	0.0816313
GO_RESPONSE_TO_ELECTRICAL_STIMULUS	0.415088	-0.045358	0.124556	-0.0581491	0.31324	-0.0561107	0.033839	-0.080275	0.416588	-0.0452125	0.136279	-0.0564052	0.348219	-0.0521993	0.0418719	-0.0769864
GO_NEGATIVE_REGULATION_OF_TELOMERE_MAINTENANCE_VIA_TELOMERASE	0.0210821	-0.127909	1.58894e-07	-0.196681	0.00390076	-0.159678	0.000169984	-0.141747	5.38607e-05	-0.222052	1.2317e-07	-0.198401	3.00542e-06	-0.255735	0.000456951	-0.132218
GO_REGULATION_OF_T_CELL_CHEMOTAXIS	8.24867e-25	0.528793	1.29866e-46	0.505499	2.20062e-42	0.662204	2.68268e-52	0.531856	4.57989e-31	0.58369	2.45768e-69	0.59917	1.07141e-08	0.310553	4.36722e-15	0.290771
GO_REGULATION_OF_ESTABLISHMENT_OF_PLANAR_POLARITY_INVOLVED_IN_NEURAL_TUBE_CLOSURE	0.533002	-0.034705	0.10507	0.0613546	0.963941	-0.0025174	0.0169918	-0.0902575	0.323598	-0.0549243	0.686257	-0.0153049	0.515761	-0.0361772	0.454087	0.0283605
GO_REGULATION_OF_CYTOKINE_PRODUCTION	1.917e-33	0.602124	3.68337e-76	0.622253	1.2833e-51	0.712431	1.17725e-76	0.623856	9.26691e-47	0.687279	1.41809e-117	0.730535	4.6684e-12	0.371229	1.55048e-37	0.45797
GO_REGULATION_OF_ERBB_SIGNALING_PATHWAY	5.92901e-10	0.334813	1.20578e-25	0.381559	7.91444e-19	0.464861	3.11301e-18	0.32115	2.81292e-12	0.374783	1.04017e-31	0.422972	0.810678	0.0133388	1.28992e-09	0.226942
GO_REGULATION_OF_CHOLESTEROL_HOMEOSTASIS	0.323877	-0.0548927	1.16272e-06	-0.182671	0.45734	-0.0413689	7.57427e-17	-0.308204	0.0120973	-0.139049	3.0059e-14	-0.282036	2.86454e-06	-0.256256	4.22511e-08	-0.205469
GO_VENTRICULAR_SEPTUM_MORPHOGENESIS	9.27733e-05	-0.215104	0.204277	-0.0480737	1.69776e-06	-0.261865	0.000192573	-0.140578	8.33174e-06	-0.244384	0.00642215	-0.102995	0.0152577	-0.134488	0.112697	-0.0600485
GO_POSITIVE_REGULATION_OF_ENDOTHELIAL_CELL_CHEMOTAXIS	0.000187479	0.205769	1.94946e-09	0.224513	0.000488918	0.192342	7.83614e-11	0.242739	0.00511814	0.154947	2.24959e-14	0.283368	0.925546	0.00520372	0.0415441	0.0771096
GO_POSITIVE_REGULATION_OF_ENDOTHELIAL_CELL_DIFFERENTIATION	0.00356602	0.161213	0.0375255	-0.0786917	0.0515475	0.108094	0.184819	0.0502145	0.00795494	0.146982	0.702807	-0.0144561	0.284129	0.0595902	0.134173	-0.0567096
GO_NEGATIVE_REGULATION_OF_SMOOTH_MUSCLE_CELL_PROLIFERATION	0.000316862	0.198527	5.66864e-18	0.318767	7.23141e-05	0.218315	1.39854e-27	0.395423	0.000130308	0.210647	4.3826e-37	0.455401	0.830178	0.0119424	3.01968e-17	0.312
GO_TOLERANCE_INDUCTION	2.37144e-29	0.569633	1.44196e-75	0.620322	1.37723e-46	0.686339	1.88974e-71	0.606526	4.97571e-42	0.660062	6.33519e-108	0.709242	5.33717e-14	0.401206	5.79669e-40	0.471429
GO_CHEMICAL_HOMEOSTASIS	6.22508e-06	0.247685	5.47364e-08	0.203782	4.18661e-08	0.298327	7.21056e-06	0.168811	5.94339e-05	0.22081	5.43804e-10	0.231936	0.465469	-0.0406257	0.132266	0.0569886
GO_SYNAPSE_ORGANIZATION	7.48313e-19	-0.46515	4.58596e-26	-0.384623	6.6013e-20	-0.477427	1.25976e-51	-0.528859	8.97906e-25	-0.528437	5.42806e-55	-0.543579	1.04868e-14	-0.411403	1.90661e-30	-0.414812
GO_METANEPHROS_DEVELOPMENT	0.330998	-0.0540916	0.0218253	0.0867359	0.0429191	-0.112376	0.152039	-0.0542343	0.491165	-0.0383224	0.480604	0.0267211	0.123009	-0.0857224	0.305596	-0.0388052
GO_REGULATION_OF_MICROTUBULE_BASED_PROCESS	0.0459497	-0.110796	0.0326456	-0.080819	0.0728411	-0.0996397	0.00489666	-0.106314	0.0121447	-0.138974	0.00332986	-0.110888	0.000424339	-0.194383	7.73589e-05	-0.148927
GO_NEGATIVE_REGULATION_OF_TRANSPORTER_ACTIVITY	0.185104	0.073693	0.0740974	-0.0675969	0.903875	-0.00672483	0.128561	0.0575395	0.388695	0.0479717	0.22124	0.0463252	0.443553	-0.0426466	0.118941	-0.0590298
GO_ENDOSOME_ORGANIZATION	0.425412	0.0443625	0.000131116	-0.144152	0.0707896	0.100358	3.46314e-06	-0.174512	0.774171	0.0159762	5.13433e-07	-0.188552	0.0036511	-0.160811	1.40294e-11	-0.251914
GO_REGULATION_OF_WOUND_HEALING	3.37166e-24	0.522842	9.09167e-48	0.511044	1.38187e-33	0.60319	2.43849e-40	0.473462	4.51068e-30	0.575627	5.64218e-68	0.594331	3.88149e-06	0.252937	2.33994e-22	0.356357
GO_REGULATION_OF_MAPK_CASCADE	2.9464e-17	0.445584	1.23894e-41	0.480354	6.09548e-24	0.520304	3.19724e-33	0.432456	1.59681e-19	0.473018	7.79293e-58	0.555469	0.00455884	0.156978	2.61223e-17	0.312593
GO_DEVELOPMENTAL_PROGRAMMED_CELL_DEATH	7.11341e-13	0.384217	3.19796e-29	0.406682	1.7406e-15	0.422269	3.19098e-26	0.385764	1.54695e-16	0.436321	8.28727e-41	0.475977	3.47809e-07	0.278123	1.49316e-15	0.295502
GO_POSITIVE_REGULATION_OF_SKELETAL_MUSCLE_TISSUE_DEVELOPMENT	0.0082523	-0.146302	0.426682	-0.0301123	0.000705322	-0.186966	7.3791e-07	-0.185965	3.57427e-05	-0.227151	0.00037889	-0.134071	9.8996e-05	-0.214259	0.00113613	-0.122848
GO_MYELOID_LEUKOCYTE_MIGRATION	1.92812e-28	0.561887	2.24958e-58	0.557673	4.83041e-42	0.66014	3.24533e-74	0.615866	4.91613e-39	0.641224	2.91886e-113	0.721262	3.19227e-11	0.357328	5.35299e-32	0.424805
GO_COLLAGEN_FIBRIL_ORGANIZATION	1.90484e-20	0.483525	8.45833e-32	0.423544	3.12621e-26	0.542187	2.06716e-47	0.509342	1.01866e-23	0.518085	6.00186e-59	0.559998	0.000579335	0.189871	7.58904e-14	0.27773
GO_POSITIVE_REGULATION_OF_NEURON_DEATH	0.223327	-0.0677308	0.422992	-0.0303531	0.429083	-0.0440119	0.00173729	-0.118252	0.256264	-0.0631537	0.0413083	-0.0771988	0.258525	-0.0628549	0.0099654	-0.0974146
GO_RESPONSE_TO_ESTRADIOL	4.22881e-08	0.298235	3.49981e-11	0.247084	1.87901e-09	0.325401	2.74632e-13	0.271623	2.54861e-09	0.322859	2.91318e-19	0.330368	0.494812	0.0380008	0.000484466	0.131635
GO_CORONARY_VASCULATURE_DEVELOPMENT	0.0767528	-0.0983142	0.00637369	0.103089	0.549719	-0.0333002	0.00243653	-0.114475	0.00856511	-0.14561	0.727077	-0.0132241	2.81032e-05	-0.230088	0.037414	-0.0787376
GO_CARTILAGE_DEVELOPMENT	0.00135746	0.176978	2.34827e-07	0.194012	8.9734e-05	0.215536	6.9437e-05	0.149887	2.10179e-06	0.259591	1.01521e-10	0.241325	0.337819	-0.0533347	0.0530783	0.0731942
GO_REGULATION_OF_TUMOR_NECROSIS_FACTOR_SUPERFAMILY_CYTOKINE_PRODUCTION	5.48798e-36	0.620597	1.68958e-79	0.632881	6.12365e-57	0.737185	2.29885e-83	0.644691	3.03235e-52	0.715489	6.93411e-125	0.745416	1.03293e-14	0.411496	1.16778e-44	0.495881
GO_NEURON_PROJECTION_EXTENSION	0.604368	-0.0288458	0.00349828	-0.110312	0.693176	-0.0219676	3.56383e-12	-0.258969	0.386559	-0.0481879	1.08559e-07	-0.199249	0.000185758	-0.205894	1.35743e-07	-0.197746
GO_REGULATION_OF_CARDIAC_MUSCLE_TISSUE_DEVELOPMENT	0.813374	0.0131452	0.173511	-0.0515361	0.876196	0.00867513	0.000935381	-0.124901	0.424911	-0.0444105	0.0653316	-0.0697479	0.000218179	-0.203702	0.929803	-0.00333794
GO_NEGATIVE_REGULATION_OF_CYCLIC_NUCLEOTIDE_METABOLIC_PROCESS	3.16279e-05	-0.22865	3.95254e-11	-0.246434	7.02981e-07	-0.271038	8.89045e-17	-0.307537	4.33726e-08	-0.298002	3.64808e-17	-0.311224	4.45076e-05	-0.224439	3.10712e-10	-0.235112
GO_PYRIMIDINE_NUCLEOTIDE_BIOSYNTHETIC_PROCESS	0.965901	-0.0023805	0.0107109	0.0964726	0.25904	-0.0627871	6.72276e-21	0.344416	0.39603	-0.047235	1.56482e-16	0.30517	0.95061	0.00344913	9.10005e-11	0.241924
GO_RESPONSE_TO_MUSCLE_STRETCH	8.87674e-05	0.215676	6.11596e-18	0.318463	8.70724e-06	0.243881	5.49888e-09	0.218286	0.00031901	0.198432	7.26868e-18	0.317772	0.288133	-0.0590979	0.00057134	0.129976
GO_NEGATIVE_REGULATION_OF_OLIGODENDROCYTE_DIFFERENTIATION	9.28289e-06	-0.243148	1.204e-05	-0.164711	6.96044e-08	-0.293618	3.06844e-07	-0.192162	1.32793e-05	-0.239007	3.9095e-07	-0.190472	0.513155	-0.0364019	0.011806	-0.0951895
GO_REGULATION_OF_PHOSPHATIDYLINOSITOL_3_KINASE_SIGNALING	0.0204746	0.128515	1.18305e-14	0.286296	0.000206841	0.204432	0.0286657	0.0827659	0.02053	0.128459	1.28872e-08	0.21303	0.118158	-0.0868457	0.0138381	0.0930646
GO_RESPONSE_TO_COLD	4.0455e-08	0.298642	3.19066e-13	0.270901	3.7794e-10	0.338403	3.81266e-14	0.280938	1.15755e-09	0.329393	2.94789e-20	0.338992	0.00593021	0.152327	0.00199393	0.116726
GO_NEGATIVE_REGULATION_OF_SODIUM_ION_TRANSPORT	0.000297242	-0.199422	0.00351045	-0.110271	2.96496e-06	-0.255882	3.72418e-06	-0.173955	1.56095e-05	-0.237113	3.00404e-05	-0.157143	0.0149416	-0.134905	0.601786	-0.019771
GO_CELLULAR_RESPONSE_TO_INTERLEUKIN_1	5.28131e-25	0.530653	6.23965e-35	0.442827	1.56055e-34	0.610186	9.14458e-48	0.511032	2.00677e-34	0.609388	4.44904e-70	0.601774	1.49909e-08	0.307592	1.41542e-20	0.341697
GO_CIRCULATORY_SYSTEM_PROCESS	0.00115168	0.179534	4.78825e-13	0.268935	9.63213e-05	0.214616	1.61748e-08	0.211605	0.000530335	0.191162	2.95234e-16	0.302485	0.934881	-0.00454971	3.37864e-05	0.156145
GO_REGULATION_OF_VASODILATION	2.15347e-07	0.282839	7.28465e-10	0.230259	6.55097e-08	0.294184	3.30259e-06	0.174874	4.94468e-06	0.25026	7.98967e-12	0.254838	0.0277736	0.122074	1.78188e-05	0.161508
GO_REGULATION_OF_TRIGLYCERIDE_METABOLIC_PROCESS	0.637487	0.0262349	1.92615e-11	0.250251	0.769514	0.0163151	6.11294e-17	0.309094	0.191502	-0.0726362	1.06769e-22	0.359076	0.00138114	-0.176707	2.91653e-09	0.222116
GO_NEGATIVE_REGULATION_OF_GLYCOPROTEIN_BIOSYNTHETIC_PROCESS	9.37116e-19	0.463987	5.38113e-19	0.32801	6.43866e-23	0.509983	6.30449e-38	0.460178	1.25298e-26	0.545824	5.5927e-41	0.476888	9.65121e-11	0.349012	3.8748e-15	0.291302
GO_RESPONSE_TO_COCAINE	9.57941e-07	-0.267857	8.36851e-10	-0.229458	7.73676e-07	-0.270057	5.89221e-14	-0.278914	4.93368e-11	-0.354085	3.54469e-13	-0.270393	1.86822e-06	-0.260849	2.06545e-08	-0.21006
GO_CELL_CHEMOTAXIS	4.94977e-30	0.575294	2.34681e-61	0.56956	1.45531e-42	0.663283	6.30462e-77	0.62473	1.77732e-39	0.644089	2.75537e-117	0.729927	5.35434e-11	0.353471	3.87463e-33	0.43194
GO_NEGATIVE_REGULATION_OF_INTRINSIC_APOPTOTIC_SIGNALING_PATHWAY_BY_P53_CLASS_MEDIATOR	1.11459e-11	0.36502	4.89769e-11	0.245283	1.82452e-14	0.407972	2.80783e-33	0.432804	1.31223e-12	0.380053	1.91393e-34	0.43991	0.432025	0.0437322	7.51444e-08	0.201697
GO_RIBONUCLEOTIDE_CATABOLIC_PROCESS	0.909018	0.00636339	1.28744e-05	-0.164168	0.958757	-0.0028796	4.25656e-05	-0.154165	0.219194	-0.0683381	2.85104e-06	-0.175993	2.33355e-07	-0.282055	2.00656e-05	-0.160526
GO_POSITIVE_REGULATION_OF_MITOTIC_SISTER_CHROMATID_SEPARATION	0.000855471	0.184074	1.1154e-08	0.213931	0.00661896	0.150347	3.18269e-20	0.338708	0.00045581	0.193355	4.58736e-22	0.354004	0.918524	0.00569608	0.00152949	0.119647
GO_DNA_TEMPLATED_TRANSCRIPTION_TERMINATION	0.44032	-0.0429493	0.000796676	-0.126574	0.332307	-0.0539456	0.522647	0.0242192	0.546141	-0.0335991	0.257343	-0.0428995	0.681986	-0.0228141	0.731099	-0.0130213
GO_NEGATIVE_REGULATION_OF_INTERLEUKIN_1_PRODUCTION	2.32084e-28	0.561191	3.27026e-57	0.552904	1.06875e-40	0.651848	2.15285e-74	0.616457	4.96433e-40	0.647637	7.47196e-102	0.694775	1.43311e-10	0.345981	3.61553e-42	0.483157
GO_POSITIVE_REGULATION_OF_CATION_CHANNEL_ACTIVITY	0.217168	-0.0686389	0.321032	-0.0375878	0.217985	-0.0685174	8.68037e-06	-0.167339	0.0740891	-0.0992106	0.00139826	-0.120621	0.0258522	-0.123613	0.000449392	-0.132384
GO_REGULATION_OF_PROSTAGLANDIN_SECRETION	0.00524747	0.154505	7.5724e-15	0.288309	0.00197781	0.170992	8.45639e-20	0.335058	0.00458387	0.156882	1.64824e-25	0.380561	0.461852	-0.0409555	1.67562e-06	0.17998
GO_REGULATION_OF_PODOSOME_ASSEMBLY	5.88775e-24	0.520453	4.17449e-46	0.503032	2.61057e-34	0.608551	1.33563e-50	0.524227	5.23873e-27	0.549252	6.45538e-73	0.611518	2.56084e-10	0.341469	2.90396e-36	0.450667
GO_REGULATION_OF_CELLULAR_SENESCENCE	0.101434	-0.0910187	0.721144	-0.0135239	0.211583	-0.0694784	0.0216099	-0.0868776	0.0234922	-0.125644	0.134904	-0.0566036	0.000386318	-0.195724	8.06798e-05	-0.148552
GO_CARDIAC_LEFT_VENTRICLE_MORPHOGENESIS	3.55566e-09	-0.320054	8.14835e-17	-0.3079	4.46864e-11	-0.354826	7.29971e-25	-0.375763	1.24292e-08	-0.309248	1.37767e-25	-0.381134	0.0225973	-0.12646	1.40171e-07	-0.19753
GO_NEGATIVE_REGULATION_OF_STRIATED_MUSCLE_CELL_DIFFERENTIATION	6.67281e-06	0.246902	0.00422576	0.108082	2.52112e-05	0.231402	3.13933e-06	0.175261	1.20303e-05	0.240157	3.52634e-09	0.220977	0.00187419	0.17186	1.82579e-09	0.2249
GO_RESPONSE_TO_AMINE	0.154557	-0.0791491	0.000334073	-0.135303	0.00748509	-0.148104	0.444813	0.0289463	0.0309713	-0.119704	0.992027	-0.000378645	0.00145335	-0.175906	0.431426	-0.0298045
GO_REGULATION_OF_ORGANIC_ACID_TRANSPORT	0.0068431	-0.149743	0.196876	-0.0488696	7.65929e-06	-0.245342	0.00359441	-0.109994	4.06431e-06	-0.252431	0.0212245	-0.0871342	9.44031e-07	-0.268008	2.71829e-06	-0.176354
GO_REGULATION_OF_DNA_DEPENDENT_DNA_REPLICATION	9.95221e-05	-0.21419	0.00237574	-0.114761	6.70633e-06	-0.246846	0.000757396	-0.127097	3.16419e-06	-0.255174	0.000340404	-0.13512	0.000241686	-0.202296	5.59629e-08	-0.203637
GO_NEGATIVE_REGULATION_OF_POTASSIUM_ION_TRANSMEMBRANE_TRANSPORTER_ACTIVITY	0.0737524	-0.0993258	0.354656	0.0350613	0.265803	-0.0619052	0.0735155	0.067733	0.0544617	-0.106783	0.149343	0.054593	0.000352657	-0.197018	0.740328	-0.0125574
GO_PROTEIN_HOMOTETRAMERIZATION	1.64753e-08	0.306753	0.00330285	0.110982	4.12732e-09	0.31879	8.34291e-11	0.242398	1.14277e-07	0.288942	5.32675e-10	0.232054	0.000708641	0.186896	6.92775e-07	0.186418
GO_IMMUNE_SYSTEM_PROCESS	8.57662e-34	0.604735	5.00728e-75	0.618549	1.04137e-53	0.722481	1.4177e-83	0.645318	2.88594e-46	0.684573	1.82304e-122	0.740603	1.05671e-10	0.34832	1.06379e-33	0.435391
GO_HEART_TRABECULA_MORPHOGENESIS	0.0141094	-0.13604	6.0573e-08	-0.203118	0.0408173	-0.113528	2.42873e-13	-0.272213	0.00339268	-0.16206	1.35245e-10	-0.239749	8.9648e-06	-0.243548	6.67756e-07	-0.186681
GO_RESPIRATORY_CHAIN_COMPLEX_IV_ASSEMBLY	0.743553	0.0182158	3.26371e-06	-0.174965	0.833109	-0.0117332	2.54106e-05	0.158554	0.0909202	0.0939301	0.51225	0.0248278	0.33339	0.0538251	0.275557	0.0412973
GO_VESICLE_LOCALIZATION	0.499377	-0.0375999	0.000213377	-0.13961	0.309762	-0.0565148	0.000566585	-0.130061	0.0516379	-0.108053	0.00119371	-0.122321	1.3361e-05	-0.238936	1.09822e-11	-0.25319
GO_NITRIC_OXIDE_METABOLIC_PROCESS	5.24778e-19	0.466976	2.08155e-12	0.26168	1.91979e-18	0.46025	7.31635e-18	0.317746	8.78248e-21	0.487263	1.20284e-24	0.374135	7.87054e-07	0.269882	3.48118e-06	0.174472
GO_POSITIVE_REGULATION_OF_LEUKOCYTE_APOPTOTIC_PROCESS	1.7452e-21	0.494921	1.41018e-47	0.510135	1.26575e-37	0.63187	1.45249e-62	0.574243	1.1852e-28	0.563704	1.22202e-82	0.642514	1.284e-07	0.28783	4.44586e-24	0.369828
GO_POSITIVE_REGULATION_OF_CELL_FATE_COMMITMENT	0.000558694	0.190402	1.88578e-06	0.179101	0.000982112	0.181979	5.78558e-06	0.170542	5.22817e-05	0.222426	9.83416e-08	0.19991	0.0420861	0.112827	9.48989e-10	0.22873
GO_FOREBRAIN_MORPHOGENESIS	0.870565	-0.0090731	0.230455	0.0454153	0.659122	-0.0245602	0.000266804	-0.137479	0.0814416	-0.0967958	0.00740758	-0.10121	0.418116	-0.0450646	0.0186593	-0.0889538
GO_TELOMERE_CAPPING	0.0183879	-0.130724	0.119365	-0.0589623	0.00055508	-0.190497	0.038464	-0.0783098	0.000814057	-0.184822	0.0135282	-0.0933701	0.000130189	-0.210659	4.60074e-07	-0.189327
GO_PROSTATE_GLAND_MORPHOGENESIS	0.00373857	-0.160406	0.898834	-0.00481727	0.000781088	-0.185442	0.00595952	-0.103919	0.032099	-0.118918	0.0989121	-0.0624653	0.0185289	-0.130568	0.104114	-0.0615236
GO_NEGATIVE_REGULATION_OF_AXON_EXTENSION	0.000290158	-0.19976	2.07924e-07	-0.194847	0.000128639	-0.210818	3.48159e-14	-0.281358	3.12743e-06	-0.255302	2.09948e-13	-0.272911	8.75601e-06	-0.243817	1.99436e-07	-0.195132
GO_POSITIVE_REGULATION_OF_TYPE_I_INTERFERON_PRODUCTION	3.08876e-20	0.481168	7.67328e-52	0.529823	5.04392e-32	0.591259	8.5789e-50	0.520527	8.95368e-24	0.518644	1.45784e-74	0.617018	4.22349e-06	0.252007	1.62838e-19	0.332583
GO_REGULATION_OF_STRESS_ACTIVATED_PROTEIN_KINASE_SIGNALING_CASCADE	0.000342734	0.197421	1.05301e-19	0.334232	6.45768e-07	0.271903	0.00371546	0.109605	5.75303e-06	0.24857	7.68899e-12	0.255036	0.926866	-0.00511118	8.20106e-05	0.148406
GO_MYELOID_CELL_DEVELOPMENT	0.0129647	0.137702	2.63655e-15	0.293006	3.95964e-06	0.252718	0.0332887	0.0805238	0.000546579	0.190722	1.17508e-07	0.198718	0.384084	0.0484392	0.000114935	0.145358
GO_NEGATIVE_REGULATION_OF_KINASE_ACTIVITY	0.00186471	0.171941	0.0175016	0.0898475	8.73086e-05	0.215891	0.0078063	0.100548	0.00457607	0.156912	0.000158759	0.142384	0.148296	-0.080366	0.0641671	-0.0700513
GO_REGULATION_OF_MITOCHONDRIAL_MEMBRANE_PERMEABILITY_INVOLVED_IN_APOPTOTIC_PROCESS	0.577013	0.0310507	6.88287e-09	-0.216914	0.760037	-0.0170066	0.192015	0.0494043	0.900008	0.00699675	0.128317	-0.0575762	0.908679	0.00638723	0.000205496	-0.139966
GO_INTRACELLULAR_PROTEIN_TRANSPORT	0.566582	-0.0319043	0.482532	-0.0266039	0.716488	-0.0202201	0.018207	0.089297	0.213998	-0.0691135	0.117782	0.0592158	0.00152763	-0.17512	0.553034	-0.022475
GO_REGULATION_OF_HISTONE_DEACETYLATION	0.0037876	0.160183	1.67103e-15	0.29501	7.89528e-05	0.217188	0.00167873	0.118629	1.28953e-06	0.264763	3.00911e-09	0.221929	0.000145889	0.209145	7.98944e-07	0.185394
GO_REGULATION_OF_PHOSPHATASE_ACTIVITY	0.0890302	-0.0944817	0.000178412	-0.141295	0.130935	-0.0839589	7.39713e-12	-0.255236	0.00687397	-0.149661	2.04738e-08	-0.210116	7.99255e-06	-0.244858	1.51473e-12	-0.263268
GO_NEUROTRANSMITTER_UPTAKE	3.57302e-10	-0.338847	1.50602e-12	-0.263297	8.63554e-11	-0.349859	3.83841e-25	-0.377845	1.38233e-10	-0.346259	1.72216e-25	-0.380421	0.00031283	-0.198706	1.22267e-10	-0.240304
GO_MICROTUBULE_ANCHORING	1.63721e-05	-0.236551	0.0223396	-0.0864024	1.90779e-06	-0.260625	7.7016e-24	-0.367998	1.59358e-08	-0.307049	5.07978e-16	-0.300168	5.49784e-10	-0.335419	1.76784e-14	-0.28447
GO_CELL_DIVISION	0.917011	0.00580229	0.245393	0.0439937	0.784943	-0.0151945	0.00199094	0.116743	0.930885	-0.00482955	0.00369616	0.109666	0.199049	-0.0714224	0.536747	-0.0234037
GO_REGULATION_OF_MRNA_CATABOLIC_PROCESS	0.487395	-0.0386562	0.726856	-0.0132352	0.724492	0.0196248	2.37145e-08	-0.209182	0.71687	0.0201917	0.000222068	-0.139231	0.045669	0.110939	0.0452998	-0.0757441
GO_INTERMEDIATE_FILAMENT_ORGANIZATION	0.778047	-0.0156945	0.817583	0.00873962	0.900107	-0.00698981	0.825102	-0.00837338	0.644555	0.0256852	0.506035	0.0251947	0.667314	-0.0239319	0.0258126	-0.08431
GO_REGULATION_OF_INTERLEUKIN_10_PRODUCTION	6.96913e-30	0.574067	3.23872e-60	0.565072	6.9213e-47	0.687969	1.20375e-81	0.639504	3.2119e-47	0.689776	1.27354e-108	0.710847	4.96728e-16	0.42963	7.51423e-44	0.491809
GO_SODIUM_ION_EXPORT	0.624959	0.0272155	0.0193058	-0.0884755	0.623755	-0.0273102	0.000119245	-0.145022	0.144856	-0.0810514	0.00171728	-0.118379	0.00152751	-0.175121	0.017847	-0.0895755
GO_NEGATIVE_REGULATION_OF_CELL_DIVISION	0.836222	-0.0115112	0.539737	-0.0232322	0.949682	-0.00351401	0.0410639	0.0772917	0.251738	-0.0637572	0.335416	0.0364871	0.00992941	-0.142833	0.144478	-0.0552531
GO_CELLULAR_RESPONSE_TO_UV	0.00587217	0.152504	0.00662668	0.102605	0.00604105	0.151995	6.81075e-06	0.169261	0.0791621	0.0975249	9.3791e-07	0.184235	0.227379	-0.0671431	0.140683	0.05578
GO_REGULATION_OF_NUCLEAR_DIVISION	0.000700348	0.187071	0.0750969	0.067365	0.0133293	0.137159	3.32015e-10	0.234738	0.00875737	0.145196	2.15721e-08	0.209784	0.426817	-0.0442281	0.334719	0.0365397
GO_RESPONSE_TO_ACID_CHEMICAL	1.08888e-08	0.310411	6.96106e-17	0.308555	1.21562e-13	0.395911	1.53243e-10	0.239058	2.05441e-11	0.360575	1.29822e-20	0.342014	0.576576	0.0310863	0.0146445	0.0922971
GO_RESPONSE_TO_PROSTAGLANDIN_E	3.52447e-10	0.338956	3.33425e-17	0.311593	1.09524e-14	0.411136	2.09161e-11	0.249816	3.39754e-11	0.356866	1.08108e-20	0.342684	0.335647	0.0535747	5.78872e-05	0.151491
GO_NEGATIVE_REGULATION_OF_RESPONSE_TO_REACTIVE_OXYGEN_SPECIES	0.000194412	0.205276	3.85005e-08	0.206071	2.75786e-05	0.230316	1.0211e-17	0.316406	2.26362e-05	0.232698	9.71791e-21	0.343074	0.00407576	0.158922	3.68733e-09	0.220708
GO_POSITIVE_REGULATION_OF_EPITHELIAL_TO_MESENCHYMAL_TRANSITION	1.91648e-05	0.234686	4.20209e-13	0.269569	1.04274e-06	0.266978	7.62605e-08	0.201599	8.78889e-06	0.243774	5.1583e-14	0.279535	0.640195	-0.026024	4.72914e-07	0.189133
GO_RESPONSE_TO_STEROID_HORMONE	1.93496e-06	0.260475	1.83687e-12	0.262306	1.73184e-08	0.306309	2.28874e-09	0.223561	1.94411e-07	0.283834	3.79944e-17	0.311057	0.509936	-0.0366803	0.00545585	0.105001
GO_POSITIVE_REGULATION_OF_RNA_SPLICING	0.0389068	0.114619	0.000769809	-0.126929	0.0113337	0.140308	2.22448e-07	-0.194384	0.0599482	0.104466	2.92036e-07	-0.192506	0.849433	0.010571	3.65252e-06	-0.174104
GO_RESPONSE_TO_IMMOBILIZATION_STRESS	1.65222e-05	0.236443	0.717332	0.013717	7.24272e-09	0.313964	0.254284	0.0431762	7.98544e-05	0.217042	0.115949	0.0595126	0.19817	0.0715621	0.228751	-0.0455816
GO_RESPONSE_TO_INTERLEUKIN_4	6.48523e-25	0.529798	2.71383e-42	0.483807	2.98285e-36	0.622452	2.60062e-60	0.56545	2.97042e-35	0.615394	1.6159e-79	0.632941	3.40189e-09	0.320428	1.64305e-24	0.373113
GO_POSITIVE_REGULATION_OF_KERATINOCYTE_DIFFERENTIATION	7.73163e-07	0.270064	0.000217283	0.139438	2.44217e-09	0.323216	0.0120553	0.0949121	8.66295e-06	0.243939	0.0026065	0.113709	0.202835	0.0708261	0.171602	-0.0517655
GO_CARDIAC_CHAMBER_MORPHOGENESIS	0.415552	0.045313	0.393118	-0.0323498	0.787239	-0.0150283	0.316881	-0.0379113	0.470295	0.040188	0.896879	-0.00491086	0.0939672	-0.0930598	0.641817	-0.0176242
GO_REGULATION_OF_CARTILAGE_DEVELOPMENT	2.03709e-08	0.304859	1.59238e-16	0.305096	2.70059e-08	0.302322	2.5464e-10	0.23623	9.96152e-10	0.330619	2.71197e-21	0.347695	0.855165	0.010164	5.8131e-07	0.18767
GO_POSITIVE_REGULATION_OF_INTERLEUKIN_8_PRODUCTION	4.98858e-32	0.591297	1.3179e-64	0.581991	6.24452e-47	0.688212	2.89074e-65	0.584447	5.33298e-47	0.688584	1.9817e-103	0.698616	5.46774e-14	0.401052	3.07385e-38	0.461929
GO_SEROTONIN_METABOLIC_PROCESS	0.000189879	-0.205597	1.50038e-07	-0.19707	2.36677e-05	-0.232163	1.44937e-19	-0.333025	1.0469e-06	-0.266937	1.4562e-15	-0.295611	1.30365e-08	-0.308827	3.66834e-16	-0.301561
GO_REGULATION_OF_DEFENSE_RESPONSE_TO_VIRUS	6.8948e-27	0.548176	3.42185e-48	0.513056	8.51958e-39	0.639663	1.24392e-65	0.585803	2.18051e-30	0.578213	2.75489e-87	0.656159	2.17508e-06	0.259224	2.14902e-22	0.356654
GO_RESPONSE_TO_PEPTIDE	3.25399e-05	0.228302	2.78677e-07	0.19283	4.76165e-07	0.274985	0.00129802	0.121423	0.000459109	0.193251	1.83782e-09	0.224861	0.0316686	-0.119215	0.879908	-0.00572478
GO_REGULATION_OF_ENDOTHELIAL_CELL_APOPTOTIC_PROCESS	9.0444e-20	0.475863	8.10891e-27	0.390035	2.20998e-25	0.534255	1.49688e-44	0.495341	1.09911e-23	0.517756	1.42874e-55	0.546043	0.00710357	0.149062	6.14717e-12	0.256188
GO_DNA_DEPENDENT_DNA_REPLICATION	0.580799	-0.0307428	0.317015	0.0379008	0.173047	-0.0757599	3.45774e-05	0.155947	0.339405	-0.0531601	0.000504677	0.131225	0.401542	-0.0466867	0.294465	0.0397087
GO_REGULATION_OF_SKELETAL_MUSCLE_CELL_DIFFERENTIATION	0.0009794	-0.182022	0.125418	-0.0580167	0.0147422	-0.135172	0.00195583	-0.116941	0.184474	-0.0737985	0.00501093	-0.106036	0.23613	-0.0658986	0.0602419	-0.0711083
GO_POSITIVE_REGULATION_OF_CELLULAR_PROTEIN_CATABOLIC_PROCESS	4.69761e-07	0.275121	0.000205277	0.139976	2.18056e-06	0.259197	1.19037e-27	0.395912	8.84274e-07	0.268684	2.61059e-24	0.37159	0.0993919	0.0915647	7.96516e-06	0.168022
GO_STEROL_HOMEOSTASIS	0.010835	0.141172	3.19193e-08	0.20728	3.50363e-05	0.227396	0.000149742	0.142926	0.0135186	0.136882	2.40885e-05	0.159002	0.524686	0.035412	0.000463813	0.132069
GO_EMBRYONIC_AXIS_SPECIFICATION	5.22923e-12	-0.370427	2.31776e-06	-0.177557	3.26823e-14	-0.404316	1.0579e-19	-0.334215	4.18962e-16	-0.430616	3.45047e-17	-0.311453	2.40789e-08	-0.303357	6.51078e-09	-0.217255
GO_REGULATION_OF_LEUKOCYTE_APOPTOTIC_PROCESS	2.25752e-32	0.593969	9.22175e-79	0.63057	1.68696e-55	0.73075	1.06749e-81	0.639663	3.07166e-46	0.684424	3.91174e-118	0.73171	2.7315e-11	0.358481	5.59116e-37	0.454795
GO_POSITIVE_REGULATION_OF_INTERLEUKIN_1_BETA_PRODUCTION	2.2014e-27	0.552622	1.98793e-72	0.609865	1.3313e-43	0.669437	4.19522e-56	0.548286	1.98921e-39	0.643773	4.60067e-92	0.669482	1.02609e-11	0.365616	1.55266e-34	0.440457
GO_CELLULAR_RESPONSE_TO_LIPID	2.26273e-12	0.376297	8.75302e-39	0.464967	8.29666e-20	0.476292	5.53498e-22	0.353344	1.59093e-13	0.39416	2.53866e-44	0.494189	0.22834	0.0670048	4.96982e-10	0.23245
GO_SECRETION_BY_CELL	0.00177059	0.172772	0.00569064	0.104486	0.000185732	0.205896	0.216577	0.0467959	0.00225326	0.168873	0.00490371	0.106297	0.371763	-0.0497054	0.541055	-0.0231567
GO_LIPOPROTEIN_METABOLIC_PROCESS	1.9335e-16	0.435053	1.52396e-21	0.349757	5.0602e-27	0.549387	2.98745e-43	0.488755	1.58675e-15	0.422819	6.29134e-45	0.497221	1.96426e-06	0.260314	3.1612e-24	0.370958
GO_DISRUPTION_OF_CELLS_OF_OTHER_ORGANISM_INVOLVED_IN_SYMBIOTIC_INTERACTION	4.1911e-07	0.276265	0.0850755	0.0651782	6.31339e-08	0.294528	3.83885e-14	0.280906	1.87149e-09	0.325434	5.05044e-12	0.257194	0.000300456	0.199272	2.12654e-06	0.178203
GO_IRON_COORDINATION_ENTITY_TRANSPORT	0.0012428	-0.178355	3.80039e-08	-0.206155	0.00232337	-0.168372	1.95371e-12	-0.261997	1.00612e-05	-0.242223	3.89906e-19	-0.32925	0.00169434	-0.173475	1.21167e-07	-0.198512
GO_PHOSPHATIDYLCHOLINE_BIOSYNTHETIC_PROCESS	0.000121619	0.21156	0.00728253	0.101424	5.95301e-05	0.22079	0.753874	-0.0118798	0.000335564	0.19772	0.332826	0.036683	0.195377	0.0720088	0.00540953	0.105106
GO_KERATAN_SULFATE_METABOLIC_PROCESS	5.05077e-18	0.455136	2.16416e-17	0.313361	1.21098e-20	0.485718	8.3932e-32	0.423565	1.31108e-18	0.462243	2.718e-37	0.456585	0.00354648	0.161307	1.79965e-10	0.238167
GO_REGULATION_OF_COAGULATION	1.3819e-28	0.563132	1.28485e-50	0.524303	9.14753e-40	0.645943	1.86897e-55	0.545548	1.26728e-35	0.61803	8.72986e-82	0.639929	1.23187e-07	0.288226	8.72493e-27	0.389808
GO_MEMBRANE_BIOGENESIS	1.77227e-12	-0.377987	1.1832e-05	-0.164852	1.36641e-09	-0.328033	1.54132e-16	-0.305233	4.63543e-14	-0.402103	1.08348e-14	-0.286694	7.03152e-14	-0.399443	1.4607e-17	-0.314959
GO_REGULATION_OF_EPIDERMIS_DEVELOPMENT	4.41972e-09	0.318207	5.22561e-06	0.171337	2.54896e-08	0.302844	0.000117816	0.145132	8.12697e-12	0.367289	7.67609e-09	0.216244	0.00208398	0.170145	0.00747733	0.101092
GO_FORMATION_OF_PRIMARY_GERM_LAYER	1.13002e-13	0.396385	1.46289e-19	0.33299	1.83352e-13	0.393232	1.42158e-17	0.315069	1.36946e-14	0.409754	2.97672e-29	0.406891	0.0426438	0.112524	0.000166949	0.141915
GO_NEGATIVE_REGULATION_OF_MUSCLE_CELL_DIFFERENTIATION	9.97072e-09	0.311183	5.55785e-12	0.256704	2.0412e-09	0.324713	5.59919e-08	0.203633	1.19777e-11	0.3645	1.31165e-16	0.305911	1.02191e-08	0.310967	4.50361e-12	0.257779
GO_ENERGY_RESERVE_METABOLIC_PROCESS	0.0021722	0.169471	8.08571e-05	0.148532	0.00451795	0.157135	0.00091509	0.125131	0.0696711	0.100757	2.03875e-06	0.178519	0.330775	-0.0541165	0.0104601	0.0967828
GO_GLYCOLIPID_BIOSYNTHETIC_PROCESS	4.59922e-07	0.275334	4.21146e-08	0.20549	1.17343e-09	0.329282	7.33464e-33	0.430222	9.88729e-05	0.214276	1.79396e-30	0.414986	0.112657	0.0881639	5.22454e-13	0.268511
GO_REGULATION_OF_ACTIN_NUCLEATION	5.20313e-05	0.222487	2.08399e-43	0.489555	3.29218e-12	0.373684	2.88182e-17	0.312191	2.33694e-05	0.232315	5.30961e-39	0.466167	0.671524	0.0236101	1.19956e-09	0.227366
GO_REGULATION_OF_DENDRITIC_CELL_DIFFERENTIATION	2.09443e-22	0.504684	1.96461e-52	0.532456	1.63911e-32	0.595041	1.37213e-66	0.589318	1.13303e-37	0.632194	3.692e-82	0.641063	6.58375e-19	0.46581	4.78082e-38	0.460854
GO_EPITHELIAL_CELL_DEVELOPMENT	1.12004e-09	0.329662	4.4518e-25	0.377366	3.74047e-12	0.372789	3.68595e-11	0.246807	4.6566e-13	0.387064	3.40443e-24	0.370712	0.136859	0.082694	0.000171227	0.141679
GO_AMIDE_TRANSPORT	0.0880778	0.0947632	0.252906	-0.0433015	0.225554	0.0674068	0.863657	0.00650666	0.479087	-0.0393966	0.835836	0.0078518	0.00532503	-0.154246	0.0032294	-0.111244
GO_REGULATION_OF_INTERFERON_GAMMA_PRODUCTION	7.7881e-32	0.589784	1.68113e-71	0.6067	3.83316e-49	0.699946	3.51059e-85	0.650064	2.44318e-45	0.679405	5.11485e-121	0.73767	3.20379e-15	0.418622	6.29371e-45	0.497221
GO_NEGATIVE_REGULATION_OF_LIPID_METABOLIC_PROCESS	0.00532605	0.154242	3.74621e-16	0.301471	0.00405654	0.159003	1.18475e-13	0.275633	0.141214	0.0817905	5.20443e-22	0.353561	0.00276903	-0.165474	1.51344e-07	0.197011
GO_PROTEIN_LOCALIZATION_TO_KINETOCHORE	0.137894	0.0824772	0.000116031	0.145271	0.189078	0.0730336	3.11187e-11	0.247711	0.433199	0.0436209	2.40658e-11	0.249075	0.153083	-0.0794322	0.0106119	0.0965944
GO_NEGATIVE_REGULATION_OF_FAT_CELL_DIFFERENTIATION	0.00757604	0.147882	2.15363e-06	0.178108	0.00798252	0.146918	0.000260522	0.137707	0.0614695	0.103854	1.27903e-09	0.226992	0.0694622	-0.100832	0.000866934	0.125696
GO_PHOTOPERIODISM	1.93022e-05	-0.234601	0.0181339	-0.0893531	1.67888e-06	-0.261983	0.220971	-0.0463521	0.000177946	-0.206476	0.108853	-0.0606978	0.027073	-0.122624	0.136666	-0.0563496
GO_ALPHA_AMINO_ACID_BIOSYNTHETIC_PROCESS	0.00725059	-0.148687	0.0914377	-0.0638899	0.000102126	-0.213853	0.291874	0.0399222	3.10406e-06	-0.255383	0.660957	0.0166177	0.0167056	-0.13267	0.451257	0.0285385
GO_MESENCHYMAL_TO_EPITHELIAL_TRANSITION	2.2932e-08	0.303796	0.000146174	0.14315	1.17538e-06	0.265732	5.11609e-08	0.204223	2.29029e-09	0.323753	3.92348e-11	0.246473	0.000854762	0.184087	1.44455e-06	0.181077
GO_ESTABLISHMENT_OF_ENDOTHELIAL_INTESTINAL_BARRIER	0.189806	-0.0729137	4.72097e-06	0.172126	0.782278	0.0153876	0.252084	-0.0433766	0.0602388	-0.104348	0.656108	0.0168715	0.00593904	-0.152301	0.0155644	-0.0914658
GO_SALIVARY_GLAND_DEVELOPMENT	2.24732e-13	0.391896	8.12127e-18	0.317327	3.21398e-15	0.418603	2.2001e-18	0.322521	1.01899e-17	0.451371	1.85797e-26	0.387457	0.00511639	0.154953	2.55545e-08	0.208705
GO_CELL_CYCLE_DNA_REPLICATION	0.00952031	0.143629	0.652976	0.0170359	0.325509	0.054708	3.28978e-05	0.156372	0.19069	0.0727688	0.000757414	0.127096	0.298388	0.0578577	0.00614939	0.103532
GO_NEGATIVE_REGULATION_OF_TRANSCRIPTION_ELONGATION_FROM_RNA_POLYMERASE_II_PROMOTER	0.000117733	-0.211988	2.77661e-13	-0.27157	7.77688e-06	-0.245169	1.52219e-08	-0.211987	0.000163827	-0.207591	1.42695e-14	-0.285446	0.710165	0.0206921	0.00346718	-0.110416
GO_CHROMOSOME_CONDENSATION	0.394193	0.0474187	0.522102	0.024251	0.801072	0.0140296	0.051212	0.0737759	0.434526	0.0434952	0.0683596	0.0689795	0.731608	-0.0190974	0.0459592	0.0755142
GO_POSITIVE_REGULATION_OF_RESPONSE_TO_STIMULUS	1.09821e-26	0.546345	1.23808e-60	0.566724	1.19484e-43	0.669712	1.25774e-58	0.558698	2.33251e-32	0.593859	4.22618e-94	0.674959	2.0659e-07	0.283244	1.4746e-24	0.373468
GO_REGULATION_OF_MONOOXYGENASE_ACTIVITY	4.35938e-08	0.297955	5.23569e-10	0.232153	6.58059e-08	0.294142	3.25601e-16	0.302069	2.1535e-09	0.324267	2.29333e-23	0.364329	0.0576235	0.105425	0.00202357	0.116562
GO_SENSORY_PERCEPTION_OF_MECHANICAL_STIMULUS	2.71466e-07	-0.280572	4.03529e-16	-0.301154	1.67652e-11	-0.36206	1.04817e-27	-0.396298	7.48243e-10	-0.33294	3.37969e-33	-0.432307	0.000888153	-0.183508	3.11218e-10	-0.235103
GO_ESTABLISHMENT_OF_EPITHELIAL_CELL_POLARITY	0.560714	0.0323877	3.83984e-05	0.155051	0.110325	0.0887378	0.000233412	-0.138758	0.0604756	0.104252	0.364031	-0.0343842	0.794357	0.0145138	0.559568	-0.0221062
GO_TOLL_LIKE_RECEPTOR_9_SIGNALING_PATHWAY	5.24736e-21	0.489725	9.86976e-73	0.610895	7.95095e-35	0.612314	4.0479e-50	0.522026	6.7617e-24	0.519857	7.05728e-87	0.654987	8.87321e-09	0.312201	1.8232e-26	0.387516
GO_EMBRYONIC_DIGIT_MORPHOGENESIS	0.0127776	-0.137986	0.722989	-0.0134306	0.00894133	-0.144808	0.000566349	-0.130065	0.000253621	-0.20163	0.0214602	-0.0869767	6.34773e-06	-0.247465	0.000103248	-0.146333
GO_REGULATION_OF_CANONICAL_WNT_SIGNALING_PATHWAY	0.00328592	0.162602	0.887125	0.00537837	0.00570535	0.153019	0.00146236	0.120135	0.018174	0.130963	0.000733138	0.127432	0.850114	-0.0105226	0.385592	0.0328671
GO_NITROGEN_CYCLE_METABOLIC_PROCESS	0.000377529	0.196051	8.4058e-08	0.200954	0.00122863	0.178533	2.24649e-16	0.303644	0.0192634	0.129772	6.89397e-17	0.308595	0.431701	-0.0437629	2.7202e-06	0.176349
GO_T_CELL_ACTIVATION_INVOLVED_IN_IMMUNE_RESPONSE	3.0594e-22	0.502962	6.08297e-69	0.597779	1.06224e-36	0.625565	4.90157e-63	0.576052	7.96288e-28	0.556526	1.05485e-98	0.686914	3.31243e-07	0.278608	8.09179e-38	0.459568
GO_NEGATIVE_REGULATION_OF_LEUKOCYTE_PROLIFERATION	4.09064e-28	0.559056	1.61777e-77	0.626624	1.07115e-45	0.681413	3.59082e-79	0.631857	7.01341e-42	0.659155	4.73168e-114	0.722989	1.53969e-10	0.345427	9.91768e-41	0.47556
GO_NECROPTOTIC_PROCESS	1.49819e-30	0.57954	5.42287e-73	0.611773	4.21859e-47	0.689136	1.34482e-70	0.603583	3.3518e-41	0.654984	2.85271e-110	0.714604	1.53807e-12	0.378963	7.89552e-30	0.410743
GO_NEGATIVE_REGULATION_OF_GLIOGENESIS	0.00677128	-0.149934	1.39371e-05	-0.163523	0.000885767	-0.183548	7.6113e-11	-0.242897	0.0739737	-0.0992501	2.15454e-10	-0.237165	0.152509	0.079543	0.0358665	-0.079387
GO_DENDRITIC_CELL_CHEMOTAXIS	4.96749e-22	0.500745	3.53895e-57	0.552763	6.19621e-30	0.57449	2.22467e-72	0.609699	6.36025e-32	0.590473	1.20091e-93	0.67375	6.54658e-11	0.351958	4.12626e-27	0.392118
GO_REGULATION_OF_ANTIGEN_PROCESSING_AND_PRESENTATION_OF_PEPTIDE_ANTIGEN	1.37268e-18	0.462004	6.24411e-50	0.521162	2.14544e-25	0.534377	4.15515e-58	0.556586	5.33564e-29	0.56666	7.8356e-76	0.621186	1.99609e-17	0.447719	3.21699e-26	0.385738
GO_REGULATION_OF_NEURONAL_SYNAPTIC_PLASTICITY	5.67666e-16	-0.428855	6.13422e-30	-0.41147	4.4211e-18	-0.455845	1.45997e-42	-0.485205	4.75044e-19	-0.467486	2.07598e-49	-0.518752	5.46181e-08	-0.295874	8.81186e-24	-0.367548
GO_REGULATION_OF_PHOSPHOLIPASE_C_ACTIVITY	9.56212e-08	0.290632	2.2856e-31	0.420785	2.01025e-11	0.360734	4.87241e-14	0.2798	7.25099e-09	0.313954	4.56728e-31	0.418849	0.158995	0.0783089	4.57012e-07	0.189374
GO_REGULATION_OF_DEVELOPMENTAL_GROWTH	0.011194	-0.140547	0.000455567	-0.132248	0.0398894	-0.114052	2.92028e-20	-0.339027	0.000700727	-0.187063	3.77409e-13	-0.27009	5.1441e-06	-0.24982	1.84256e-14	-0.284281
GO_MEMBRANE_DISASSEMBLY	0.994711	0.000369155	0.142449	0.0555335	0.745896	-0.0180434	0.00247811	0.114283	0.148546	-0.0803167	0.000713452	0.127712	0.0879237	-0.094809	0.50122	-0.0254805
GO_REGULATION_OF_SYNAPTIC_TRANSMISSION_GLUTAMATERGIC	8.63081e-16	-0.426409	3.29034e-21	-0.347	7.16302e-17	-0.440657	9.01738e-38	-0.459302	2.69029e-21	-0.492889	1.80667e-39	-0.46874	7.53443e-12	-0.36783	9.34228e-26	-0.382371
GO_ACTIVATION_OF_PHOSPHOLIPASE_C_ACTIVITY	2.04595e-06	0.259879	1.34156e-43	0.49053	1.2597e-09	0.3287	2.04425e-31	0.421096	7.19189e-08	0.293312	1.56606e-54	0.541609	0.0033104	0.162476	7.74646e-20	0.335388
GO_NEGATIVE_REGULATION_OF_BIOMINERAL_TISSUE_DEVELOPMENT	1.37781e-13	0.395097	3.27305e-20	0.338604	9.469e-17	0.439092	4.35199e-23	0.362153	3.7199e-15	0.417722	3.6631e-34	0.438208	0.00018163	0.206199	1.64231e-13	0.274083
GO_NEGATIVE_REGULATION_OF_BONE_RESORPTION	1.63687e-12	0.378535	1.04123e-48	0.515487	2.87956e-22	0.503238	1.08264e-25	0.381902	9.32314e-18	0.45185	4.13292e-48	0.512668	4.89595e-06	0.25037	1.68805e-15	0.294966
GO_CELLULAR_RESPONSE_TO_EXTERNAL_STIMULUS	1.58063e-19	0.473069	2.40268e-46	0.504202	1.33057e-31	0.587955	5.75577e-44	0.492396	4.83011e-23	0.511261	3.62584e-75	0.61901	7.85917e-05	0.217247	5.083e-15	0.290094
GO_NADP_METABOLIC_PROCESS	0.00018898	0.205661	4.84985e-11	0.245336	2.39796e-05	0.232005	6.17041e-35	0.442856	0.00380812	0.16009	5.09008e-33	0.431207	0.954235	0.00319571	1.36765e-10	0.239687
GO_POSITIVE_REGULATION_OF_MRNA_PROCESSING	0.207012	-0.0701776	0.000176138	-0.141415	0.424767	-0.0444242	1.67781e-08	-0.211374	0.152171	-0.0796084	8.07433e-08	-0.201221	0.159156	-0.0782788	2.22054e-05	-0.159683
GO_EPITHELIAL_TUBE_BRANCHING_INVOLVED_IN_LUNG_MORPHOGENESIS	2.11333e-09	0.324423	2.23361e-26	0.386882	1.7322e-12	0.378145	8.27463e-18	0.317252	2.83908e-13	0.390354	1.68688e-35	0.446195	5.22406e-05	0.222436	2.77035e-07	0.192871
GO_DETECTION_OF_MECHANICAL_STIMULUS_INVOLVED_IN_SENSORY_PERCEPTION	5.9441e-05	-0.220809	1.05051e-22	-0.359132	2.21081e-06	-0.25905	7.53115e-31	-0.417443	2.42046e-06	-0.258076	1.01794e-36	-0.4533	0.00317933	-0.163159	6.51917e-09	-0.217247
GO_REGULATION_OF_CELL_CELL_ADHESION_MEDIATED_BY_CADHERIN	0.00011459	0.212344	1.67133e-10	0.238578	4.35645e-05	0.224705	2.35616e-19	0.331178	1.80125e-05	0.235422	1.98698e-19	0.331827	0.0084906	0.145773	3.91028e-22	0.354564
GO_METANEPHRIC_EPITHELIUM_DEVELOPMENT	1.82444e-08	-0.305845	8.31324e-05	-0.148284	4.94256e-16	-0.429659	4.3856e-14	-0.280289	3.93571e-09	-0.319193	4.78979e-11	-0.245403	3.73953e-05	-0.226595	0.0556553	-0.0724183
GO_REGULATION_OF_SMOOTH_MUSCLE_CELL_DIFFERENTIATION	0.00402826	0.159124	0.296001	0.0395827	0.00711044	0.149044	0.0262246	-0.0840782	2.26337e-05	0.232699	0.884159	-0.00552069	0.0125459	0.138342	0.168702	0.0521176
GO_FATTY_ACID_BETA_OXIDATION	0.174164	0.0755641	0.0842687	0.065347	0.340617	0.0530271	0.238608	0.0446317	0.858697	0.00991344	0.0932244	0.0635411	0.801375	0.0140078	4.44984e-05	0.153781
GO_ACTIN_FILAMENT_BASED_PROCESS	3.7132e-06	0.253425	6.71639e-18	0.318089	1.02507e-08	0.31094	0.0035437	0.110161	9.69626e-08	0.290501	5.65236e-12	0.256618	0.497301	0.037782	0.00215622	0.115852
GO_RESPONSE_TO_FLUID_SHEAR_STRESS	1.69739e-17	0.448603	6.87667e-27	0.390544	3.5637e-20	0.480467	2.86183e-27	0.39324	3.18462e-19	0.469527	8.80315e-46	0.501445	0.0637155	0.102974	2.02683e-14	0.283845
GO_NEGATIVE_REGULATION_OF_MUSCLE_CONTRACTION	1.9829e-06	0.260214	3.52836e-11	0.247041	2.68232e-08	0.302383	1.61996e-06	0.18023	4.45191e-07	0.275661	2.7258e-12	0.260324	0.16764	0.0767217	0.0175856	0.0897809
GO_TRANSITION_METAL_ION_TRANSPORT	1.43111e-08	0.308003	0.00861633	0.0992911	3.57204e-10	0.33885	8.51111e-15	0.287784	2.1234e-05	0.233464	6.2736e-12	0.256083	0.552002	0.0331101	0.372861	0.0337563
GO_POSITIVE_REGULATION_OF_MUSCLE_CELL_DIFFERENTIATION	0.132203	0.0836843	4.16058e-05	0.154361	0.110008	0.0888168	0.14655	0.0549699	0.240375	0.0653067	1.47841e-05	0.163041	0.000547037	-0.19071	0.754585	-0.0118444
GO_REGULATION_OF_ADAPTIVE_IMMUNE_RESPONSE	4.30742e-34	0.606951	9.965e-82	0.639754	4.38996e-51	0.709792	2.45883e-82	0.641598	1.18947e-51	0.712593	8.16694e-126	0.747236	3.48625e-16	0.431676	7.6007e-45	0.496812
GO_PHOSPHATIDYLINOSITOL_BIOSYNTHETIC_PROCESS	0.113581	-0.0879389	0.00719487	0.101576	0.546207	-0.0335935	0.179359	-0.0508449	0.0155625	-0.134093	0.279599	0.0409517	0.000781474	-0.185435	0.0742719	-0.0675562
GO_POSITIVE_REGULATION_OF_CELL_COMMUNICATION	1.09428e-17	0.450985	3.82575e-41	0.477765	5.38617e-26	0.540001	3.96804e-35	0.443997	8.1113e-20	0.476405	3.89218e-60	0.564755	0.00355435	0.161269	3.06721e-15	0.292338
GO_POSITIVE_REGULATION_OF_LIPID_KINASE_ACTIVITY	6.72033e-05	0.219251	1.02389e-13	0.276322	3.53081e-05	0.227302	5.48589e-05	0.151961	0.0015904	0.174482	1.48379e-12	0.263371	0.958899	0.00286968	0.0114013	0.0956508
GO_RESPONSE_TO_CORTICOSTEROID	7.16413e-11	0.351276	2.85742e-16	0.302624	4.88669e-13	0.386741	5.45668e-25	0.376708	1.28082e-14	0.410169	5.06585e-34	0.437354	0.0704844	0.100466	3.17969e-07	0.191915
GO_POSITIVE_REGULATION_OF_LEUKOCYTE_DEGRANULATION	6.51923e-22	0.499494	4.6502e-74	0.615346	1.07871e-31	0.588673	1.27059e-63	0.578283	3.12319e-26	0.54219	1.07937e-96	0.681764	3.888e-06	0.252919	2.39635e-36	0.451151
GO_SODIUM_ION_TRANSMEMBRANE_TRANSPORT	0.000415121	-0.194698	2.72337e-07	-0.192989	0.00129188	-0.177752	1.33142e-23	-0.366164	1.64301e-05	-0.236509	1.03581e-23	-0.367006	9.52989e-05	-0.214755	1.12182e-12	-0.264759
GO_PROTEIN_UBIQUITINATION_INVOLVED_IN_UBIQUITIN_DEPENDENT_PROTEIN_CATABOLIC_PROCESS	0.0257331	-0.123711	0.0294922	-0.0823433	0.0379644	-0.115174	1.19324e-06	-0.182481	0.0011286	-0.179847	5.60489e-05	-0.151773	0.000157162	-0.208149	2.65511e-14	-0.282607
GO_NEGATIVE_REGULATION_OF_BLOOD_VESSEL_ENDOTHELIAL_CELL_MIGRATION	4.88563e-11	0.354158	0.000148711	0.142991	4.02516e-14	0.402999	9.76285e-09	0.214759	1.70372e-13	0.393712	1.85586e-09	0.224804	0.000752574	0.185999	0.000355666	0.134691
GO_CELL_PROJECTION_ASSEMBLY	0.630771	-0.0267596	1.6463e-11	0.251076	0.86265	-0.0096333	0.807687	-0.00922295	0.871892	-0.00897926	0.002934	0.112353	0.662153	-0.0243274	0.0621574	0.0705856
GO_REGULATION_OF_PROTEIN_IMPORT_INTO_NUCLEUS_TRANSLOCATION	1.67553e-07	0.285273	8.16566e-05	0.148444	3.30284e-14	0.40425	0.912957	0.00414188	5.23165e-08	0.296273	0.0266373	0.0838491	0.684003	0.0226611	0.0292011	-0.082491
GO_GLUCOCORTICOID_METABOLIC_PROCESS	0.988112	0.000829699	2.72831e-08	-0.208287	0.239322	-0.0654528	3.80965e-05	-0.155118	0.34438	-0.0526159	3.72025e-06	-0.173963	0.429622	-0.0439606	0.0328722	-0.0807145
GO_PROTEIN_MATURATION	2.73919e-24	0.523728	5.13677e-28	0.39845	8.38573e-30	0.573402	1.00447e-53	0.538121	8.96886e-28	0.556072	2.71009e-61	0.569316	5.33251e-07	0.273844	1.90781e-19	0.331982
GO_SKELETAL_MUSCLE_ADAPTATION	0.148724	0.0802816	0.0147902	0.0921625	0.67675	0.0232119	0.0416883	0.0770553	0.318064	0.0555549	0.0277728	0.0832343	0.389329	0.0479077	0.457732	0.028132
GO_PROTEIN_N_LINKED_GLYCOSYLATION	2.48765e-20	0.482226	9.30312e-31	0.416846	7.06424e-29	0.565624	6.90796e-45	0.497019	1.5206e-19	0.473263	7.10834e-61	0.567674	0.00160034	0.174384	3.91763e-12	0.258488
GO_ANAPHASE_PROMOTING_COMPLEX_DEPENDENT_CATABOLIC_PROCESS	6.06346e-06	0.24798	0.00142437	0.120421	0.000101863	0.213887	6.80289e-30	0.411172	4.10662e-06	0.252317	2.2313e-23	0.364422	0.00930584	0.144058	1.43664e-08	0.21235
GO_HINDLIMB_MORPHOGENESIS	0.00571933	-0.152975	1.44109e-06	-0.181095	0.000123303	-0.211378	7.52981e-17	-0.308229	0.000198368	-0.205002	2.5998e-14	-0.282704	0.0189807	-0.130076	2.33858e-12	-0.261095
GO_ESTABLISHMENT_OR_MAINTENANCE_OF_EPITHELIAL_CELL_APICAL_BASAL_POLARITY	0.00344124	-0.161819	1.51098e-08	-0.212033	1.78703e-05	-0.235516	3.68503e-12	-0.258799	0.00430274	-0.157984	1.91576e-12	-0.262096	0.00169626	-0.173457	0.000126845	-0.144456
GO_LOOP_OF_HENLE_DEVELOPMENT	5.36858e-13	-0.386111	1.26349e-09	-0.227063	1.46617e-17	-0.4494	2.83409e-23	-0.363612	4.81681e-16	-0.429808	1.04861e-20	-0.342796	2.51019e-05	-0.231454	0.000154522	-0.142635
GO_VESICLE_ORGANIZATION	0.0106338	0.14153	0.0100204	0.097343	0.00052459	0.19132	3.35875e-05	0.156195	0.125366	0.0851888	1.74487e-06	0.179679	0.0135381	-0.136854	0.0355982	-0.079502
GO_KERATINOCYTE_PROLIFERATION	0.0448703	-0.111348	3.64693e-05	-0.155492	0.00145982	-0.175836	2.26232e-16	-0.303614	0.00229077	-0.168603	4.96634e-11	-0.245208	0.000553075	-0.190549	5.04928e-05	-0.152685
GO_MACROPHAGE_ACTIVATION_INVOLVED_IN_IMMUNE_RESPONSE	1.64511e-21	0.495197	2.02898e-75	0.619837	1.66597e-33	0.602582	8.70154e-51	0.525073	4.30021e-30	0.575797	3.0076e-87	0.65605	1.06344e-13	0.396778	5.92468e-34	0.436941
GO_INDOLALKYLAMINE_METABOLIC_PROCESS	1.18598e-09	0.329194	2.49597e-13	0.272082	4.87964e-16	0.429733	2.41044e-20	0.339737	7.56115e-17	0.440354	1.57251e-22	0.357738	9.09128e-06	0.243387	1.62199e-14	0.284863
GO_POSITIVE_REGULATION_OF_BINDING	3.59343e-06	0.253784	8.9883e-16	0.297709	4.72513e-08	0.297214	7.13909e-14	0.278017	8.0852e-07	0.269605	8.07507e-24	0.36784	0.820158	-0.012659	8.10558e-07	0.18529
GO_SMOOTH_MUSCLE_CELL_DIFFERENTIATION	0.135607	0.0829577	0.49839	0.0256491	0.505287	0.037084	0.154882	0.0538612	0.0716714	0.100047	0.00831061	0.0997525	0.393044	-0.0475339	0.297358	-0.0394717
GO_MALE_GENITALIA_DEVELOPMENT	0.0805631	-0.0970749	7.06199e-05	-0.149737	0.00502807	-0.15526	1.06881e-07	-0.199353	0.0273844	-0.122378	1.47588e-07	-0.197181	0.000521284	-0.191412	2.36118e-05	-0.15917
GO_REGULATION_OF_HYDROLASE_ACTIVITY	2.54217e-08	0.302868	3.77306e-27	0.392393	1.39501e-14	0.40964	2.56491e-06	0.176793	3.07515e-09	0.321281	3.73393e-19	0.329416	0.448755	0.0421619	0.000291669	0.13662
GO_ENDOCARDIAL_CUSHION_DEVELOPMENT	0.0183378	0.13078	0.643418	0.0175395	0.0625315	0.103435	0.154412	0.0539224	0.00914668	0.144382	0.162536	0.0528817	0.852412	-0.0103594	0.110821	-0.0603631
GO_NEGATIVE_REGULATION_OF_ERBB_SIGNALING_PATHWAY	3.05748e-07	0.2794	6.1573e-15	0.289237	7.46918e-13	0.383887	3.09712e-15	0.292295	1.19605e-06	0.26555	2.65638e-23	0.363832	0.669148	-0.0237916	2.35325e-05	0.159198
GO_RESPONSE_TO_DIETARY_EXCESS	0.0198936	-0.12911	9.64424e-07	-0.184033	0.0221344	-0.126894	2.99782e-08	-0.207683	0.00533331	-0.154218	1.25105e-08	-0.213216	0.413646	-0.0454983	0.0173132	-0.0899978
GO_REGULATION_OF_MEIOTIC_NUCLEAR_DIVISION	0.00295283	0.164401	0.0946629	0.0632642	0.0182602	0.130866	7.61147e-06	0.168383	0.00072368	0.186583	1.37957e-06	0.181417	0.202694	-0.0708482	0.00908993	0.0986043
GO_BRANCH_ELONGATION_OF_AN_EPITHELIUM	7.71548e-16	0.427065	1.09506e-37	0.458826	9.17957e-22	0.497912	3.2266e-29	0.406656	1.0774e-22	0.507682	1.04887e-48	0.515473	3.18224e-05	0.228575	4.87885e-15	0.290277
GO_POSITIVE_REGULATION_OF_CELLULAR_AMIDE_METABOLIC_PROCESS	3.72916e-08	0.299387	1.10436e-09	0.227849	3.2586e-10	0.339575	2.07349e-17	0.313536	5.50132e-10	0.335413	1.27678e-21	0.350387	0.00853402	0.145678	2.92401e-09	0.2221
GO_POSITIVE_REGULATION_OF_VACUOLE_ORGANIZATION	0.026503	-0.123081	0.554131	0.022413	0.117713	-0.0869505	2.70783e-06	-0.176384	0.00613854	-0.151708	0.00523347	-0.105508	0.000184051	-0.20602	1.97609e-05	-0.160652
GO_NEGATIVE_REGULATION_OF_PLATELET_ACTIVATION	6.05759e-12	0.369384	2.5553e-15	0.293144	1.3247e-14	0.40996	2.80943e-06	0.176105	1.63375e-15	0.422645	3.99505e-13	0.269814	6.70386e-05	0.219282	7.55779e-06	0.168439
GO_GLUTAMINE_FAMILY_AMINO_ACID_CATABOLIC_PROCESS	0.00704188	-0.149221	2.43858e-05	-0.1589	8.9399e-05	-0.215585	8.37147e-13	-0.266203	0.000401748	-0.195166	6.82076e-11	-0.243493	0.0238181	-0.125353	0.000878498	-0.125558
GO_EMBRYONIC_SKELETAL_SYSTEM_DEVELOPMENT	0.0112712	0.140415	0.00608758	0.103657	0.00907027	0.144539	0.0195665	0.0882867	0.000393883	0.195448	0.000326942	0.135513	0.0752061	0.0988316	0.547782	0.022773
GO_NEURON_MATURATION	5.60754e-06	-0.248856	0.0602927	-0.0710943	0.000172591	-0.206889	1.34493e-13	-0.275032	3.5641e-06	-0.253874	4.90164e-11	-0.245278	0.0171021	-0.132197	0.00125409	-0.121793
GO_THYMIC_T_CELL_SELECTION	7.30027e-28	0.556857	2.47203e-54	0.540756	1.70249e-38	0.637685	1.2505e-60	0.566707	1.00083e-41	0.658213	5.09448e-83	0.643656	8.15475e-17	0.439931	2.23949e-36	0.451322
GO_CELLULAR_RESPONSE_TO_BIOTIC_STIMULUS	1.60853e-28	0.562565	2.73646e-77	0.625893	3.27136e-47	0.689733	8.29807e-70	0.600827	2.74762e-35	0.615636	3.92869e-115	0.725331	2.04447e-09	0.324699	3.56392e-36	0.45015
GO_COENZYME_A_METABOLIC_PROCESS	0.00918657	-0.1443	3.28052e-18	-0.320943	0.00283035	-0.165109	2.5489e-18	-0.321941	2.70987e-06	-0.256857	4.17657e-22	-0.354333	8.5566e-08	-0.291681	3.94759e-06	-0.173507
GO_PROTEIN_LOCALIZATION_TO_CILIUM	1.07503e-07	-0.289522	0.0271409	-0.0835738	4.71151e-08	-0.29724	2.48754e-14	-0.282907	2.84841e-11	-0.358171	6.21231e-09	-0.217542	1.71578e-09	-0.326154	0.0023122	-0.115067
GO_RNA_STABILIZATION	0.00200204	0.170795	0.216525	0.0468012	0.0519458	0.107911	0.817624	-0.00873766	0.0136174	0.136739	0.200026	0.0485282	0.703157	-0.0212169	0.919445	-0.00383202
GO_ACTIN_MYOSIN_FILAMENT_SLIDING	0.372371	-0.0496423	0.924383	-0.00359641	0.206232	-0.070298	0.0739724	0.067626	0.763258	0.0167713	0.257799	0.0428584	0.09452	0.0929044	1.006e-05	0.166159
GO_REGULATION_OF_CELL_MORPHOGENESIS_INVOLVED_IN_DIFFERENTIATION	0.0455291	-0.11101	0.000198599	-0.140288	0.0138013	-0.136475	3.94295e-16	-0.301253	0.0019073	-0.171578	2.58907e-11	-0.248688	3.67192e-07	-0.277584	1.36846e-10	-0.239684
GO_REGULATION_OF_PROTEIN_HOMODIMERIZATION_ACTIVITY	4.99962e-12	0.370745	5.96151e-20	0.336369	1.66182e-15	0.422544	1.32829e-35	0.446807	5.98612e-14	0.400473	9.69655e-48	0.510911	0.0102722	0.142189	1.09666e-15	0.296847
GO_REGULATION_OF_HETEROTYPIC_CELL_CELL_ADHESION	1.95643e-13	0.392807	2.98991e-12	0.259857	3.78807e-16	0.431198	1.05299e-28	0.403177	8.87907e-16	0.426243	1.50079e-35	0.446494	0.00144381	0.17601	1.24998e-10	0.240183
GO_POSITIVE_REGULATION_OF_REACTIVE_OXYGEN_SPECIES_BIOSYNTHETIC_PROCESS	1.76917e-13	0.393466	4.02435e-44	0.493181	2.43118e-20	0.482338	4.73248e-24	0.36962	9.57431e-18	0.451707	3.9494e-49	0.517454	0.0014009	0.176484	4.55867e-29	0.405643
GO_ALPHA_AMINO_ACID_METABOLIC_PROCESS	0.0152317	-0.134522	0.970032	-0.00142352	0.00727746	-0.148619	0.117164	0.0593153	0.00197291	-0.171032	0.20014	0.0485159	0.145831	-0.0808559	0.0218503	0.0867195
GO_MITOCHONDRIAL_DNA_METABOLIC_PROCESS	0.0236769	-0.125479	0.0311569	-0.0815222	0.016272	-0.1332	0.0501655	-0.0741099	0.0063276	-0.151161	0.0167576	-0.0904495	0.0947986	-0.0928263	0.00185471	-0.11753
GO_CGMP_METABOLIC_PROCESS	0.0212178	-0.127776	6.3437e-13	-0.267563	0.0011262	-0.17988	2.10375e-17	-0.313477	3.25491e-05	-0.228299	1.07219e-21	-0.351008	2.29508e-06	-0.258648	1.75387e-19	-0.332302
GO_ADULT_BEHAVIOR	5.42531e-15	-0.415437	1.27695e-26	-0.388626	2.52124e-16	-0.433537	3.36724e-39	-0.467257	1.43884e-19	-0.473541	1.04182e-43	-0.491089	3.12205e-11	-0.357493	1.89171e-29	-0.408213
GO_RETINAL_GANGLION_CELL_AXON_GUIDANCE	5.90722e-11	-0.352732	3.74872e-10	-0.234052	4.13525e-11	-0.355405	2.52792e-17	-0.312727	4.18771e-16	-0.430618	2.1345e-16	-0.30386	1.12381e-13	-0.39642	2.09407e-11	-0.24981
GO_POSITIVE_REGULATION_OF_MEMBRANE_INVAGINATION	5.40886e-18	0.45477	6.2802e-60	0.563929	4.56565e-25	0.531258	1.64944e-47	0.50981	5.7761e-28	0.557748	3.89061e-71	0.605447	3.7415e-13	0.388524	8.11531e-35	0.442145
GO_SPINDLE_LOCALIZATION	0.175221	-0.0753796	0.016225	0.0908951	0.168909	-0.0764939	0.000684504	-0.128137	0.0376912	-0.115337	0.185711	-0.0501129	0.00523677	-0.154542	0.00135021	-0.120998
GO_HYDROGEN_PEROXIDE_CATABOLIC_PROCESS	2.17175e-11	0.360168	0.105511	0.0612772	1.71607e-11	0.36189	1.72876e-15	0.294861	6.48213e-14	0.399964	2.02114e-11	0.249997	1.65333e-05	0.236435	3.43986e-07	0.191367
GO_CELLULAR_RESPONSE_TO_ORGANIC_CYCLIC_COMPOUND	0.00715616	0.148927	3.77541e-16	0.301438	0.000190403	0.205559	0.000262694	0.137628	0.00281308	0.165211	8.20677e-14	0.277363	0.0890877	-0.0944647	0.469759	0.0273854
GO_POSITIVE_REGULATION_OF_CYTOKINE_PRODUCTION_INVOLVED_IN_IMMUNE_RESPONSE	7.35333e-27	0.547924	9.90004e-65	0.582456	6.69468e-42	0.659278	3.5238e-74	0.615747	3.44674e-40	0.648644	1.15262e-107	0.70864	6.60661e-12	0.368767	3.64383e-32	0.425861
GO_REGULATION_OF_PROTEIN_SUMOYLATION	0.00714757	0.148949	2.7312e-06	0.176318	0.0242872	0.124941	0.000109072	0.145835	0.00313735	0.163383	2.18715e-09	0.223831	0.0579886	0.105272	0.000252166	0.13802
GO_RESPONSE_TO_ENDOPLASMIC_RETICULUM_STRESS	2.41085e-11	0.359401	2.34245e-11	0.249218	5.16716e-13	0.386367	2.24546e-28	0.400928	3.47512e-11	0.356699	2.84093e-32	0.426542	0.651523	0.0251458	0.000296888	0.136449
GO_CELLULAR_RESPONSE_TO_LIGHT_STIMULUS	0.0073171	0.14852	0.00119575	0.122303	0.0135821	0.13679	5.26662e-08	0.204034	0.193629	0.0722906	6.41551e-09	0.217345	0.150734	-0.0798876	0.270042	0.0417746
GO_POSITIVE_REGULATION_BY_HOST_OF_VIRAL_TRANSCRIPTION	0.90989	-0.00630216	0.00824445	-0.0998544	0.457545	0.0413501	0.000595548	-0.129556	0.608839	0.0284898	0.000111865	-0.145605	0.802089	-0.0139563	0.00217063	-0.115778
GO_NEGATIVE_REGULATION_OF_STEM_CELL_DIFFERENTIATION	0.0155433	-0.134118	0.179461	-0.0508329	0.0126799	-0.138135	0.112978	-0.0600017	0.00109124	-0.180365	0.449954	-0.0286207	0.348885	-0.0521273	0.528514	-0.0238786
GO_NEGATIVE_REGULATION_OF_PRODUCTION_OF_MOLECULAR_MEDIATOR_OF_IMMUNE_RESPONSE	5.7716e-25	0.530283	7.42275e-60	0.56364	4.28597e-34	0.606967	1.76782e-63	0.577739	3.55168e-38	0.635568	1.18261e-94	0.676426	3.72636e-09	0.319657	1.16736e-36	0.452958
GO_SPHINGOLIPID_MEDIATED_SIGNALING_PATHWAY	0.00582972	0.152633	1.16445e-06	0.18266	0.000960317	0.182322	0.000469081	0.131957	0.0006962	0.187159	2.11781e-06	0.178234	0.000717889	0.186703	1.09115e-13	0.276022
GO_SYNAPTIC_VESICLE_CYTOSKELETAL_TRANSPORT	0.000520379	0.191438	0.0226897	-0.0861792	3.85961e-05	0.226205	6.87673e-06	0.169185	9.23977e-07	0.26823	0.0261522	0.0841187	0.0314919	0.119338	0.502019	-0.0254329
GO_LUNG_CELL_DIFFERENTIATION	3.52604e-10	-0.338952	0.000139245	-0.143598	3.51528e-12	-0.373225	2.77459e-13	-0.271574	2.59069e-14	-0.405779	1.23253e-10	-0.24026	6.67063e-10	-0.333866	0.00286016	-0.112646
GO_PLATELET_ACTIVATION	3.88814e-23	0.512221	1.04046e-52	0.533676	2.58966e-33	0.601142	1.42149e-32	0.428429	4.39956e-25	0.531412	2.65671e-62	0.573233	4.93844e-05	0.223141	1.91762e-19	0.331962
GO_CYTOSKELETON_ORGANIZATION	0.0460105	0.110765	1.23044e-09	0.227218	0.0117735	0.139575	0.214237	-0.0470349	0.109453	0.0889551	0.0205616	0.0875852	0.370389	-0.0498482	0.998559	6.84e-05
GO_NUCLEOTIDE_BINDING_DOMAIN_LEUCINE_RICH_REPEAT_CONTAINING_RECEPTOR_SIGNALING_PATHWAY	3.83832e-16	0.431122	3.52883e-47	0.508229	3.60071e-23	0.512561	2.67262e-41	0.478591	5.55989e-19	0.466679	9.99177e-69	0.597014	0.000398445	0.195284	1.82516e-16	0.304521
GO_TRANSCRIPTION_COUPLED_NUCLEOTIDE_EXCISION_REPAIR	0.0396099	-0.114212	0.179289	-0.0508531	0.0123696	-0.138618	2.58528e-07	0.193349	0.0392922	-0.114395	0.00168628	0.11858	0.459219	-0.0411965	0.107709	0.0608944
GO_MEMBRANE_DEPOLARIZATION_DURING_ACTION_POTENTIAL	2.69775e-06	-0.256906	6.59313e-16	-0.299048	9.94802e-07	-0.267466	9.14777e-32	-0.423327	3.77606e-07	-0.277306	1.13107e-32	-0.429049	7.34112e-07	-0.270595	2.57925e-19	-0.330833
GO_MATURATION_OF_SSU_RRNA	0.139821	0.0820773	0.00900553	-0.0987243	0.314339	0.0559836	0.0325393	0.0808683	0.134616	0.0831677	0.508129	0.0250708	0.995258	-0.000330915	0.726007	0.0132781
GO_BETA_AMYLOID_METABOLIC_PROCESS	9.44348e-09	0.311657	5.28928e-10	0.232095	1.67593e-10	0.344771	1.8146e-08	0.21088	7.04737e-05	0.218645	2.21423e-10	0.237012	0.103809	-0.0903945	0.965565	-0.00163581
GO_RESPONSE_TO_WOUNDING	1.04754e-24	0.527791	1.74278e-53	0.53708	2.22204e-35	0.616295	1.00549e-45	0.501161	9.69825e-31	0.58107	1.79321e-79	0.6328	2.58718e-06	0.257358	2.55956e-22	0.356045
GO_NON_CANONICAL_WNT_SIGNALING_PATHWAY	1.10315e-06	0.266393	1.29037e-09	0.22694	5.88509e-06	0.248315	3.77891e-27	0.392388	2.29497e-06	0.258649	1.29958e-29	0.409303	0.160861	0.077961	4.32404e-10	0.233242
GO_RENAL_SYSTEM_PROCESS_INVOLVED_IN_REGULATION_OF_BLOOD_VOLUME	3.585e-15	0.417945	3.76345e-23	0.362648	1.61145e-14	0.408745	2.96038e-23	0.363464	5.5227e-17	0.442108	3.68132e-35	0.44419	1.75263e-08	0.306203	1.56269e-14	0.285032
GO_NEGATIVE_REGULATION_OF_LEUKOCYTE_MEDIATED_IMMUNITY	3.58919e-28	0.55955	1.94909e-77	0.626365	2.78953e-43	0.667549	5.29742e-78	0.628168	1.25172e-44	0.675379	5.5631e-115	0.725005	9.4845e-14	0.397518	1.42202e-44	0.495452
GO_POSITIVE_REGULATION_OF_CREB_TRANSCRIPTION_FACTOR_ACTIVITY	7.80436e-08	-0.292546	1.2978e-05	-0.164103	5.10858e-06	-0.249897	6.0751e-27	-0.390927	3.16302e-10	-0.33981	2.70293e-20	-0.339313	3.83969e-05	-0.226269	9.51932e-10	-0.228712
GO_NEGATIVE_REGULATION_OF_CELL_GROWTH	0.681297	-0.0228663	0.00273091	-0.113177	0.769023	-0.0163509	0.000148477	-0.143005	0.150291	-0.0799741	0.00019274	-0.14057	0.00448537	-0.157261	0.0629359	-0.0703769
GO_MODIFIED_AMINO_ACID_TRANSPORT	0.0013001	0.177653	0.417009	0.0307461	0.000222268	0.203448	0.113354	0.0599392	0.18254	0.0741241	0.0575994	0.0718525	0.0889811	-0.0944961	0.26948	0.0418236
GO_CGMP_BIOSYNTHETIC_PROCESS	0.282111	0.0598401	0.648406	-0.0172763	0.464062	0.0407539	0.0963431	0.0629449	0.630092	0.0268127	0.575316	0.0212258	0.291646	-0.0586697	0.000363234	-0.134485
GO_PROTEIN_SECRETION	1.13056e-15	0.424823	2.6872e-20	0.339335	2.10898e-23	0.514914	8.12725e-23	0.360015	8.58636e-18	0.452293	7.14345e-36	0.448387	0.00675281	0.149984	1.89353e-06	0.179071
GO_ALTERNATIVE_MRNA_SPLICING_VIA_SPLICEOSOME	2.06367e-06	-0.259787	1.95241e-12	-0.262001	1.88096e-07	-0.284155	1.19514e-21	-0.350622	2.57873e-06	-0.257393	7.31739e-24	-0.368169	0.0621834	-0.103571	2.88263e-09	-0.222186
GO_ASSOCIATIVE_LEARNING	1.21833e-10	-0.34723	7.19276e-17	-0.308419	1.47346e-11	-0.362999	1.98802e-27	-0.394353	3.71571e-13	-0.38857	2.08297e-26	-0.3871	1.66306e-09	-0.326412	4.42675e-20	-0.337481
GO_SNORNA_METABOLIC_PROCESS	0.807991	0.0135318	2.78739e-07	-0.192829	0.507586	-0.0368841	0.335506	-0.0364803	0.295303	0.0582277	0.00130118	-0.121397	0.077467	0.0980782	0.693657	0.0149245
GO_NEGATIVE_REGULATION_OF_CELLULAR_CATABOLIC_PROCESS	0.386952	-0.0481481	0.140675	0.0557811	0.851148	0.0104491	0.29642	-0.0395483	0.185928	-0.0735553	0.879476	0.00574553	0.0033739	-0.162155	0.0979512	-0.0626435
GO_REGULATION_OF_RESPONSE_TO_EXTRACELLULAR_STIMULUS	0.00879521	-0.145116	0.00161292	-0.119067	0.0696174	-0.100776	0.000109771	-0.145777	0.000118851	-0.211864	0.000157883	-0.142435	2.25204e-05	-0.232759	1.61276e-05	-0.162329
GO_COFACTOR_TRANSPORT	0.0294076	0.120835	0.263704	0.0423313	0.00659322	0.150418	2.01495e-06	0.178607	0.0168325	0.132518	0.00110661	0.123128	0.448918	0.0421467	0.25997	0.0426637
GO_POSITIVE_REGULATION_OF_FAT_CELL_DIFFERENTIATION	2.13887e-10	0.342876	3.05794e-40	0.472932	5.54009e-15	0.415309	3.99195e-26	0.38506	1.5012e-13	0.394539	2.61625e-47	0.508852	0.0641744	0.102797	6.13967e-11	0.244063
GO_NEGATIVE_REGULATION_OF_PROTEIN_POLYMERIZATION	0.800271	-0.0140873	0.0512451	0.0737654	0.755785	0.0173177	0.028947	-0.0826209	0.789558	-0.0148605	0.826433	0.0083086	0.163849	-0.0774101	0.819564	-0.00864308
GO_EXOGENOUS_DRUG_CATABOLIC_PROCESS	0.000265677	-0.200986	3.74211e-05	-0.155272	1.32682e-05	-0.239017	1.62513e-19	-0.332591	0.000602316	-0.1893	3.77501e-21	-0.346505	0.563502	-0.0321577	0.000607516	-0.129354
GO_NEGATIVE_REGULATION_OF_REACTIVE_OXYGEN_SPECIES_METABOLIC_PROCESS	2.03041e-15	0.421353	2.04165e-15	0.294132	2.4625e-22	0.503949	2.46557e-28	0.400649	2.20947e-15	0.420848	2.29576e-34	0.439434	0.00228137	0.168671	1.98613e-13	0.273177
GO_REGULATION_OF_PROTEIN_DEACETYLATION	0.00689968	0.149593	7.16558e-11	0.243225	2.82966e-05	0.230005	0.301967	0.0390973	0.000692796	0.187232	0.000283883	0.136882	0.0159502	0.133601	0.0311229	0.0815385
GO_OTIC_VESICLE_DEVELOPMENT	0.0745441	-0.0990557	0.0800795	-0.0662454	0.260519	-0.0625929	3.58472e-08	-0.206533	0.121211	-0.0861346	2.18207e-07	-0.194516	0.691328	0.022107	0.579198	-0.0210105
GO_POSITIVE_REGULATION_OF_DNA_TEMPLATED_TRANSCRIPTION_INITIATION	7.90175e-11	0.350534	2.19444e-05	0.159781	1.17332e-08	0.309755	3.58574e-05	0.155637	5.70858e-12	0.369806	4.62277e-08	0.204884	0.053326	0.107287	0.153705	0.0540149
GO_NEURON_PROJECTION_EXTENSION_INVOLVED_IN_NEURON_PROJECTION_GUIDANCE	0.00244771	0.167516	0.872782	0.0060673	0.000227633	0.20312	0.122219	0.0585118	0.000564857	0.190241	0.0848051	0.0652346	0.130036	-0.0841547	0.00264318	-0.11355
GO_PHOSPHOLIPID_DEPHOSPHORYLATION	1.76213e-08	-0.306155	7.06975e-13	-0.267033	4.76758e-06	-0.250665	3.25557e-28	-0.399818	6.77194e-11	-0.351702	2.72194e-25	-0.378953	1.74514e-06	-0.261573	1.24828e-17	-0.315595
GO_NEGATIVE_REGULATION_OF_DNA_REPAIR	0.0405532	-0.113676	0.00865352	-0.0992359	0.0121913	-0.138899	4.71693e-06	-0.172132	0.0514471	-0.10814	1.68796e-05	-0.161954	0.00683199	-0.149772	3.16866e-05	-0.156691
GO_METAL_ION_TRANSPORT	0.217105	-0.0686484	0.000667719	-0.128391	0.157061	-0.0786729	8.2668e-07	-0.185148	0.01082	-0.141198	1.92489e-06	-0.178948	0.000875732	-0.183721	8.12922e-10	-0.229626
GO_INSULIN_SECRETION	2.07612e-05	-0.233733	5.00499e-21	-0.345486	5.88312e-09	-0.315758	2.66729e-20	-0.339362	3.35757e-14	-0.404146	1.04118e-24	-0.374606	1.58462e-10	-0.345205	6.46833e-24	-0.368581
GO_POSITIVE_REGULATION_OF_FIBROBLAST_PROLIFERATION	9.82864e-17	0.438883	4.67165e-36	0.449465	7.63679e-26	0.53859	1.86957e-52	0.532551	7.70955e-21	0.487888	7.34957e-69	0.597488	0.000237896	0.202514	8.67665e-18	0.317061
GO_PREASSEMBLY_OF_GPI_ANCHOR_IN_ER_MEMBRANE	0.000128033	0.21088	2.24792e-07	0.194312	8.62708e-05	0.216046	6.58265e-25	0.376099	0.0175151	0.131714	9.25604e-24	0.367383	0.179965	0.0745613	1.50138e-10	0.239172
GO_NECROTIC_CELL_DEATH	7.10941e-31	0.582157	5.67698e-66	0.587058	5.52025e-47	0.688503	1.99735e-66	0.588722	3.97388e-43	0.666641	2.11083e-99	0.68868	1.49613e-15	0.423167	4.54165e-38	0.460979
GO_REGULATION_OF_MAST_CELL_ACTIVATION_INVOLVED_IN_IMMUNE_RESPONSE	1.93005e-28	0.561883	1.89125e-81	0.638905	3.5336e-48	0.694898	1.10737e-84	0.648599	2.56738e-39	0.643057	3.6875e-126	0.747908	5.468e-09	0.316387	1.56822e-40	0.474493
GO_POSITIVE_REGULATION_OF_CELLULAR_AMINE_METABOLIC_PROCESS	0.000795875	0.185161	4.85108e-06	0.171915	0.000881103	0.183628	9.5544e-05	0.147034	0.000214477	0.203936	9.62855e-07	0.184045	0.153864	0.079282	1.20278e-07	0.198561
GO_POSITIVE_REGULATION_OF_INTRACELLULAR_PROTEIN_TRANSPORT	3.65329e-09	0.319825	3.16976e-24	0.370949	1.31055e-11	0.363849	4.00552e-13	0.269801	4.09593e-08	0.298528	9.40383e-30	0.410238	0.283037	0.0597252	2.25939e-07	0.194277
GO_REGULATION_BY_VIRUS_OF_VIRAL_PROTEIN_LEVELS_IN_HOST_CELL	0.352931	0.0516919	6.81672e-07	0.186533	0.0749131	0.0989306	0.00833016	0.0997226	0.885841	0.00799444	3.21142e-05	0.156577	0.534154	-0.0346075	0.230722	-0.0453893
GO_CHROMOSOME_LOCALIZATION	1.8918e-05	0.23484	2.77066e-05	0.157826	0.000183094	0.20609	1.27983e-17	0.315494	0.000178237	0.206454	4.94125e-17	0.309974	0.834234	-0.011653	0.0517692	0.0736004
GO_REGULATION_OF_RESPIRATORY_SYSTEM_PROCESS	6.09248e-11	-0.3525	9.84293e-17	-0.307113	9.03154e-14	-0.397833	8.68847e-47	-0.506344	1.99706e-18	-0.460043	2.79276e-46	-0.503884	2.54245e-08	-0.302867	8.12355e-24	-0.36782
GO_POSITIVE_REGULATION_OF_ADENYLATE_CYCLASE_ACTIVITY	9.50712e-08	-0.290687	8.30242e-10	-0.229504	6.8099e-06	-0.246673	2.42511e-15	-0.293375	1.33734e-07	-0.287441	5.8798e-14	-0.278924	2.04504e-06	-0.259884	3.70556e-09	-0.220678
GO_POSITIVE_REGULATION_OF_NEURON_DIFFERENTIATION	7.83526e-12	-0.36755	1.10424e-16	-0.306632	1.02717e-10	-0.348537	2.53358e-32	-0.426855	3.43745e-14	-0.403998	4.77449e-32	-0.425119	7.0722e-11	-0.351374	1.23817e-23	-0.366408
GO_EMBRYONIC_SKELETAL_SYSTEM_MORPHOGENESIS	0.00258718	0.166601	4.51235e-07	0.189464	0.00553076	0.153573	9.26262e-06	0.16682	0.000179207	0.206381	1.12997e-08	0.21385	0.0322237	0.118833	0.0179098	0.0895266
GO_ACTIVATION_OF_GTPASE_ACTIVITY	0.035085	0.116945	1.11721e-10	0.2408	1.58023e-06	0.262624	0.0488176	-0.0745488	0.0458279	0.110858	0.135681	0.0564912	0.859707	0.00984188	0.370044	0.0339556
GO_INOSITOL_PHOSPHATE_METABOLIC_PROCESS	3.66869e-05	-0.22683	0.956435	-0.00206993	6.2961e-05	-0.22008	6.2516e-09	-0.217503	1.14278e-05	-0.240753	0.000120407	-0.144933	0.00130344	-0.177613	0.350042	-0.0353986
GO_T_CELL_HOMEOSTASIS	5.08993e-23	0.511028	1.772e-60	0.566109	2.42483e-40	0.64961	4.25646e-63	0.576286	1.88868e-28	0.561964	3.45955e-91	0.66709	3.81318e-10	0.338333	5.68272e-31	0.418236
GO_REGULATION_OF_RECEPTOR_ACTIVITY	0.000413964	-0.194738	0.000283655	-0.136889	0.00039566	-0.195384	7.34085e-07	-0.186002	9.94815e-06	-0.242353	2.00241e-05	-0.160543	3.87326e-07	-0.277053	4.30814e-08	-0.205343
GO_HISTONE_METHYLATION	2.71161e-09	-0.322339	4.5015e-10	-0.233014	7.56067e-10	-0.332856	2.39381e-25	-0.379365	7.28906e-11	-0.351145	2.58539e-24	-0.371622	9.69453e-05	-0.214532	8.00522e-12	-0.254828
GO_CELLULAR_RESPONSE_TO_FLUID_SHEAR_STRESS	1.04722e-14	0.411412	4.05761e-15	0.291098	3.6353e-18	0.456884	2.5906e-27	0.393544	7.75012e-14	0.398818	3.00934e-36	0.450577	0.336466	0.0534841	2.88753e-08	0.207924
GO_POSITIVE_REGULATION_OF_TRANSPORTER_ACTIVITY	0.00578995	-0.152756	0.997671	-0.000110586	0.00730351	-0.148554	1.58806e-06	-0.180378	0.00892133	-0.144849	0.000435983	-0.132685	0.0221614	-0.126868	0.0423461	-0.0768095
GO_POSITIVE_REGULATION_OF_TRANSCRIPTION_FACTOR_IMPORT_INTO_NUCLEUS	4.69561e-21	0.490253	2.49954e-59	0.56153	1.17692e-31	0.588375	1.24207e-46	0.505593	3.18991e-25	0.532743	8.11083e-80	0.633874	1.18327e-07	0.28861	1.26025e-31	0.42244
GO_ALPHA_BETA_T_CELL_DIFFERENTIATION	4.87548e-18	0.455324	6.66968e-52	0.530095	3.19191e-33	0.600457	1.37818e-46	0.505374	3.284e-25	0.532623	2.06955e-68	0.595889	9.99275e-07	0.26742	1.48753e-21	0.349843
GO_ESTABLISHMENT_OF_PROTEIN_LOCALIZATION_TO_CHROMOSOME	0.737411	-0.0186685	0.0554836	-0.072469	0.359039	-0.0510404	0.0524048	0.0734021	0.912137	-0.00614439	0.854459	0.0069504	0.0877462	0.0948618	0.00351088	0.11027
GO_PEPTIDE_CROSS_LINKING	4.20362e-05	0.225148	0.00321082	0.111311	0.00045265	0.193455	1.11039e-06	0.183007	4.55581e-06	0.251169	1.40497e-08	0.21249	0.212444	0.069348	0.00447538	0.107396
GO_PEPTIDYL_SERINE_MODIFICATION	0.343714	0.0526885	3.97431e-07	0.190356	0.109861	0.0888532	0.121906	-0.0585609	0.745793	0.018051	0.10575	0.0612352	0.00679973	-0.149858	0.0683076	-0.0689925
GO_CELLULAR_RESPONSE_TO_EXTRACELLULAR_STIMULUS	1.08715e-09	0.329906	1.99241e-25	0.379954	1.66687e-14	0.408534	1.24987e-24	0.374009	5.25547e-10	0.335779	7.79598e-41	0.476118	0.702905	0.0212358	1.83516e-05	0.161265
GO_ROUNDABOUT_SIGNALING_PATHWAY	0.578502	0.0309295	0.164105	0.0526853	0.306477	0.0568993	0.604743	0.0196103	0.403838	0.0464596	0.34488	0.0357794	0.943794	0.00392587	0.976743	-0.00110461
GO_ESTABLISHMENT_OF_PROTEIN_LOCALIZATION	0.075768	0.0986427	0.034443	0.0800058	0.0282366	0.121716	4.5332e-06	0.17244	0.658698	0.0245928	3.93935e-07	0.190418	0.00334674	-0.162292	0.802105	-0.00949623
GO_NEGATIVE_REGULATION_OF_RESPONSE_TO_DNA_DAMAGE_STIMULUS	0.00012489	0.211209	2.27577e-05	0.159478	0.000997273	0.181746	1.21999e-17	0.315688	0.00999573	0.142707	2.36836e-16	0.30342	0.51844	-0.0359468	6.82938e-06	0.169239
GO_GLUTAMATE_METABOLIC_PROCESS	1.9392e-05	-0.234546	3.51198e-15	-0.291739	3.20973e-07	-0.278919	9.90467e-21	-0.343004	7.18156e-08	-0.293325	7.51681e-21	-0.34401	5.56176e-05	-0.221648	4.85528e-06	-0.171908
GO_SPHINGOMYELIN_METABOLIC_PROCESS	0.0017442	0.173012	5.80916e-10	0.231558	1.69029e-08	0.306525	1.79039e-10	0.238196	0.0135878	0.136782	5.99942e-11	0.244188	0.3984	-0.0469986	0.0240358	0.0853478
GO_TRNA_METABOLIC_PROCESS	0.0863161	-0.0952905	5.0267e-05	-0.152724	0.0111255	-0.140665	0.0324797	0.080896	0.0112994	-0.140367	0.601029	-0.0198122	0.0526317	-0.107599	0.579292	-0.0210053
GO_NEGATIVE_REGULATION_OF_ATPASE_ACTIVITY	2.831e-05	0.229999	2.27589e-09	0.223595	6.17016e-06	0.247784	3.14318e-12	0.259605	2.12951e-07	0.282948	6.80988e-14	0.278238	1.44491e-06	0.263568	1.37404e-15	0.295865
GO_POSITIVE_REGULATION_OF_LOCOMOTION	4.08656e-25	0.531718	2.52495e-48	0.513679	3.28914e-36	0.622155	3.36802e-38	0.461707	3.10989e-30	0.576953	1.16373e-68	0.596779	3.04149e-06	0.255605	1.78273e-15	0.294727
GO_REGULATION_OF_DENDRITE_MORPHOGENESIS	5.33343e-16	-0.429217	1.55572e-24	-0.373292	1.07589e-17	-0.451077	2.23692e-47	-0.509178	4.65159e-19	-0.467594	7.99538e-49	-0.516025	5.56965e-12	-0.36998	2.60884e-29	-0.407276
GO_CELLULAR_RESPONSE_TO_LITHIUM_ION	0.537708	0.0343073	5.17028e-10	0.232225	0.613855	0.0280917	2.50512e-20	0.339594	0.612126	0.0282288	5.85744e-22	0.353145	0.151949	0.0796515	0.00218469	0.115705
GO_MAMMARY_GLAND_EPITHELIUM_DEVELOPMENT	0.000424269	0.194385	9.55031e-21	0.343137	2.07024e-05	0.233766	5.24874e-07	0.188395	9.64157e-05	0.214603	1.84119e-17	0.314019	0.358235	0.0511258	1.51254e-08	0.212027
GO_CELLULAR_RESPONSE_TO_PROSTAGLANDIN_STIMULUS	0.000423074	0.194426	1.89287e-08	0.210613	4.57932e-06	0.251112	4.42879e-05	0.153822	0.00283438	0.165085	1.17313e-10	0.240532	0.0294995	-0.120767	0.928673	0.00339184
GO_REGULATION_OF_MYELOID_CELL_APOPTOTIC_PROCESS	7.09645e-18	0.453317	3.31076e-37	0.456096	5.59332e-33	0.598612	8.24852e-45	0.496635	3.36323e-22	0.50253	1.01035e-63	0.57866	0.00129908	0.177665	1.52659e-16	0.305274
GO_NEGATIVE_REGULATION_OF_VIRAL_PROCESS	1.66852e-23	0.515938	1.60313e-51	0.52839	1.91475e-35	0.616756	8.84506e-47	0.506306	3.73361e-35	0.614681	5.68718e-66	0.587056	2.53427e-11	0.359033	1.40693e-20	0.341719
GO_ERYTHROCYTE_HOMEOSTASIS	2.86328e-12	0.37466	1.2657e-33	0.43493	1.10522e-20	0.486158	3.43218e-24	0.370686	1.29416e-18	0.462311	2.66323e-41	0.478599	0.00588962	0.15245	2.12708e-18	0.322654
GO_RESPONSE_TO_HEAT	1.6915e-17	0.448622	1.73962e-20	0.340939	1.60909e-24	0.525983	3.72208e-38	0.461464	1.57376e-21	0.495404	3.5622e-51	0.526829	0.006657	0.150243	6.41786e-12	0.255966
GO_NOTCH_RECEPTOR_PROCESSING	7.67264e-08	0.292706	1.8423e-09	0.224847	8.47561e-11	0.350001	1.73627e-09	0.225197	4.81249e-10	0.336482	1.44662e-14	0.285383	0.155758	0.0789199	0.983849	-0.000767059
GO_CELLULAR_RESPONSE_TO_CADMIUM_ION	8.81368e-05	0.215769	0.143262	0.0554208	0.00129226	0.177747	5.66166e-05	0.151685	0.00070838	0.186901	0.000401937	0.133489	0.00839248	0.145989	1.2123e-05	0.164655
GO_SUCKLING_BEHAVIOR	0.0411388	-0.113348	1.0513e-07	-0.199464	0.00145573	-0.175881	7.57075e-06	-0.168425	0.00532465	-0.154247	1.18708e-07	-0.198649	7.77396e-06	-0.245173	6.01877e-12	-0.256296
GO_POSITIVE_REGULATION_OF_KIDNEY_DEVELOPMENT	0.00199434	0.170858	1.6242e-10	0.238736	0.00111633	0.180015	7.76751e-11	0.242787	3.94975e-06	0.252746	4.44249e-18	0.319739	0.000916042	0.183039	2.68233e-09	0.222616
GO_REGULATION_OF_MITOTIC_SPINDLE_CHECKPOINT	0.911432	0.00619389	9.03542e-05	-0.147537	0.641551	-0.0259185	0.00821939	0.0998931	0.309608	-0.0565327	0.856418	0.00685581	0.00767861	-0.147634	0.104069	-0.0615316
GO_I_KAPPAB_KINASE_NF_KAPPAB_SIGNALING	2.74087e-28	0.560566	1.13542e-70	0.603838	4.64187e-45	0.677831	1.14625e-60	0.566856	4.96641e-41	0.653925	2.48297e-102	0.695947	2.92603e-12	0.374508	7.43951e-32	0.423898
GO_REGULATION_OF_NON_CANONICAL_WNT_SIGNALING_PATHWAY	0.00478643	-0.156125	0.139118	-0.0560004	0.661922	-0.0243451	1.18559e-15	-0.296507	0.0151646	-0.13461	1.43186e-10	-0.239434	0.000166622	-0.207363	0.000855626	-0.125833
GO_REGULATION_OF_KINASE_ACTIVITY	1.15287e-08	0.30991	1.00842e-23	0.367096	4.71583e-13	0.386979	5.64953e-13	0.268129	1.50198e-09	0.327254	7.61817e-27	0.390228	0.75223	0.0175783	0.00474112	0.106704
GO_CHROMOSOME_LOCALIZATION_TO_NUCLEAR_ENVELOPE_INVOLVED_IN_HOMOLOGOUS_CHROMOSOME_SEGREGATION	0.525761	0.0353203	0.0658522	0.0696137	0.524304	0.0354446	0.000275638	0.137166	0.23176	-0.0665159	0.00489096	0.106329	0.00916298	-0.144348	0.305644	-0.0388014
GO_NEGATIVE_REGULATION_OF_DNA_RECOMBINATION	0.00435481	-0.157775	0.0915746	-0.063863	0.00286774	-0.16489	0.318073	-0.0378181	0.000953051	-0.182437	0.193179	-0.0492754	0.000378629	-0.19601	9.99366e-06	-0.166212
GO_POSITIVE_REGULATION_OF_LYMPHOCYTE_MIGRATION	3.0416e-31	0.585109	2.71764e-54	0.540579	7.3457e-52	0.713618	2.1715e-86	0.65358	3.51735e-44	0.672799	1.03588e-110	0.715596	3.05039e-12	0.374218	4.19983e-33	0.431724
GO_NEGATIVE_REGULATION_OF_CELLULAR_RESPONSE_TO_INSULIN_STIMULUS	0.00856314	0.145615	0.93807	-0.00294398	0.00750695	0.14805	0.111318	-0.0602793	0.0418599	0.11295	0.424448	0.0302579	0.0111958	-0.140544	0.0106278	-0.0965747
GO_POSITIVE_REGULATION_OF_CELLULAR_EXTRAVASATION	4.28343e-28	0.558881	2.56905e-46	0.50406	5.85067e-40	0.647183	2.19847e-74	0.616427	4.53504e-37	0.628105	3.02446e-99	0.688286	1.06109e-07	0.289646	1.75199e-26	0.387641
GO_MYELOID_LEUKOCYTE_DIFFERENTIATION	7.62844e-25	0.52912	1.46785e-69	0.599958	3.31914e-38	0.635764	3.60439e-68	0.595028	1.9493e-28	0.561846	2.03425e-108	0.710379	1.46761e-07	0.286549	2.67727e-33	0.432931
GO_PEROXISOME_ORGANIZATION	2.25631e-06	-0.258831	0.129689	-0.0573705	2.30712e-05	-0.232469	0.00230011	-0.115126	8.01678e-08	-0.292294	0.0030153	-0.112038	0.000158625	-0.208024	0.000922229	-0.12505
GO_DNA_STRAND_ELONGATION_INVOLVED_IN_DNA_REPLICATION	0.45954	-0.0411671	0.223926	0.0460572	0.167344	-0.0767752	8.35029e-07	0.185075	0.440412	-0.0429407	6.74555e-05	0.150143	0.921566	0.00548276	0.173132	0.0515814
GO_CELLULAR_MODIFIED_AMINO_ACID_CATABOLIC_PROCESS	0.542038	-0.033943	0.0928857	0.0636068	0.209814	-0.0697477	0.00597686	0.103883	0.0077516	-0.14746	0.00997308	0.0974046	0.000368851	-0.196382	0.033435	0.0804573
GO_SINGLE_ORGANISM_CELL_ADHESION	7.00732e-30	0.574048	2.2499e-70	0.602807	1.41319e-46	0.686277	5.93654e-64	0.579534	4.55425e-41	0.654158	5.50233e-101	0.692636	1.77583e-08	0.306085	1.95833e-27	0.394399
GO_POLYOL_METABOLIC_PROCESS	0.000330427	-0.197937	0.212902	0.047172	0.00013765	-0.209919	2.20137e-06	-0.177944	1.25391e-05	-0.239676	0.00544314	-0.10503	3.25589e-05	-0.228295	0.0897569	-0.0642231
GO_POSITIVE_REGULATION_OF_TRANSCRIPTION_INITIATION_FROM_RNA_POLYMERASE_II_PROMOTER	0.00075916	0.185869	0.0176352	-0.0897418	0.223052	0.0677709	0.882966	-0.00557793	0.00638134	0.151009	0.426458	-0.0301269	0.668812	0.0238173	0.752654	-0.0119407
GO_APICAL_JUNCTION_ASSEMBLY	0.00070359	0.187002	2.76535e-10	0.235768	0.000103804	0.21364	0.00386159	0.10915	6.56828e-06	0.24708	1.49383e-08	0.212105	0.965393	-0.00241601	0.0437293	0.076303
GO_PYRIMIDINE_RIBONUCLEOSIDE_TRIPHOSPHATE_METABOLIC_PROCESS	0.980063	-0.00139152	0.306877	0.0387027	0.46018	-0.0411085	5.89642e-12	0.256401	0.607586	-0.0285894	5.31331e-09	0.218496	0.843204	-0.0110139	1.42792e-07	0.197404
GO_LYMPHOCYTE_HOMEOSTASIS	3.92132e-24	0.522197	7.91631e-66	0.586527	5.06626e-44	0.671882	6.00238e-55	0.543393	1.06003e-27	0.555433	6.50199e-86	0.6522	1.47015e-06	0.263386	8.43545e-28	0.396955
GO_SERTOLI_CELL_DEVELOPMENT	0.166418	-0.0769423	3.52657e-05	0.155779	0.94416	-0.00390024	0.64939	-0.0172245	0.0955668	-0.0926119	0.138719	0.0560569	0.0229887	-0.1261	0.00818049	-0.0999535
GO_NEGATIVE_REGULATION_OF_RNA_SPLICING	0.187006	-0.073376	0.00531172	-0.105328	0.0576746	-0.105404	0.142719	-0.0554959	0.328821	-0.0543353	0.0260145	-0.084196	0.652787	0.0250482	0.948214	-0.00246101
GO_CELL_CYCLE_PHASE_TRANSITION	0.881834	-0.00827709	0.921066	0.00375468	0.775739	-0.0158622	0.00324782	0.111178	0.629587	-0.0268523	0.00736121	0.101289	0.105378	-0.0899881	0.767029	-0.0112255
GO_TISSUE_MORPHOGENESIS	4.33947e-07	0.275917	3.7294e-15	0.291472	5.46308e-08	0.295872	6.1308e-07	0.187291	2.71092e-09	0.322341	2.16187e-17	0.313366	0.62968	0.026845	0.000123542	0.144698
GO_ENDOSOME_TO_LYSOSOME_TRANSPORT	0.00359452	-0.161077	0.252458	0.0433424	0.113187	-0.0880347	3.24635e-06	-0.175005	0.0197851	-0.129223	0.000322565	-0.135645	0.0820153	-0.0966149	3.34628e-07	-0.191559
GO_MRNA_PROCESSING	0.001629	-0.174102	9.2422e-08	-0.200323	0.000540369	-0.190889	8.92559e-07	-0.184594	0.00184786	-0.172087	1.26814e-09	-0.227042	0.0659754	-0.102113	8.44809e-05	-0.14814
GO_RESPONSE_TO_ANGIOTENSIN	0.0145473	0.135435	5.53108e-15	0.289717	0.0580594	0.105243	4.25153e-09	0.219848	0.222348	0.067874	3.26756e-18	0.320958	0.249309	-0.0640843	1.60721e-14	0.284904
GO_DENDRITIC_SPINE_DEVELOPMENT	5.1082e-10	-0.336006	0.000125504	-0.144554	4.14891e-12	-0.372061	3.60978e-17	-0.311267	1.0004e-13	-0.397173	2.29874e-13	-0.272477	1.10473e-10	-0.34798	3.3569e-13	-0.270656
GO_REGULATION_OF_PROTEIN_OLIGOMERIZATION	0.000340396	0.197518	3.3508e-12	0.259281	2.42526e-06	0.258055	1.21009e-18	0.324865	0.00148862	0.175528	7.82213e-23	0.360146	0.901709	-0.00687712	3.37676e-07	0.191496
GO_HEME_METABOLIC_PROCESS	1.32085e-05	0.23907	0.0144253	0.092502	3.15077e-10	0.33984	9.13833e-15	0.287463	3.40838e-06	0.254363	6.58397e-11	0.243685	0.000256562	0.20147	3.55866e-14	0.281257
GO_SERINE_FAMILY_AMINO_ACID_BIOSYNTHETIC_PROCESS	6.07942e-07	-0.272517	0.114613	-0.0597312	2.15445e-07	-0.282835	0.0013849	-0.120725	9.80743e-11	-0.34889	0.00175971	-0.118111	0.0113405	-0.140297	0.371285	-0.0338677
GO_CEREBELLAR_PURKINJE_CELL_LAYER_FORMATION	2.72484e-16	-0.433092	3.54044e-18	-0.32064	7.5032e-15	-0.413459	4.45942e-43	-0.487862	8.66321e-21	-0.487329	1.95444e-45	-0.499739	2.40199e-14	-0.406253	3.12433e-21	-0.347186
GO_CELLULAR_RESPONSE_TO_CARBOHYDRATE_STIMULUS	3.30621e-10	0.339461	4.43469e-14	0.280237	1.78488e-15	0.42212	7.79965e-15	0.288176	1.96006e-10	0.343556	1.29751e-26	0.388576	0.476131	0.0396619	6.21915e-06	0.169976
GO_INOSITOL_PHOSPHATE_CATABOLIC_PROCESS	0.0013803	-0.176717	2.43303e-07	-0.193768	0.00318123	-0.163149	1.01258e-11	-0.253612	4.614e-06	-0.251029	3.03581e-12	-0.25978	1.094e-06	-0.266479	0.000246798	-0.138226
GO_C21_STEROID_HORMONE_METABOLIC_PROCESS	0.0156919	0.133928	0.570866	0.0214734	0.0215483	0.127454	0.0131121	0.09379	0.00665398	0.150252	0.126149	0.0579048	0.15275	0.0794965	0.0918808	0.0638029
GO_NEGATIVE_REGULATION_OF_GLIAL_CELL_DIFFERENTIATION	5.28851e-13	-0.386212	3.60007e-21	-0.346676	3.55006e-19	-0.468974	6.26012e-34	-0.436795	1.21052e-13	-0.395938	3.53893e-39	-0.467138	0.0132546	-0.137269	2.95263e-14	-0.282118
GO_POSITIVE_REGULATION_OF_SYNAPSE_ASSEMBLY	1.36517e-22	-0.506618	1.76425e-28	-0.401646	4.8645e-25	-0.530995	5.29153e-53	-0.534968	4.53098e-29	-0.567262	5.79988e-55	-0.543456	3.22273e-15	-0.418586	1.43827e-26	-0.388256
GO_TRANSMISSION_OF_NERVE_IMPULSE	1.43204e-10	-0.345986	6.14845e-17	-0.30907	5.9261e-11	-0.352708	3.58627e-31	-0.419527	2.11622e-13	-0.392291	8.50957e-35	-0.442022	2.44924e-07	-0.281582	1.28241e-17	-0.315486
GO_POSITIVE_REGULATION_OF_VASCULATURE_DEVELOPMENT	3.95239e-25	0.531856	5.01528e-44	0.492698	3.21687e-33	0.600432	5.55484e-48	0.51206	2.48925e-32	0.593641	3.89959e-73	0.612256	7.77927e-07	0.270001	6.47746e-20	0.336059
GO_POSITIVE_REGULATION_OF_EPIDERMAL_CELL_DIFFERENTIATION	8.31216e-13	0.383163	0.000490374	0.131513	1.53367e-13	0.394399	0.404621	0.0315706	1.0708e-13	0.396733	0.0570031	0.0720243	0.000114983	0.212299	0.710089	-0.0140849
GO_MEMBRANE_FUSION	0.445617	-0.0424538	0.623901	0.0185776	0.810204	0.0133728	0.229247	0.0455331	0.189872	-0.0729029	0.32761	0.0370805	0.00842345	-0.145921	0.00262615	-0.113623
GO_POSITIVE_REGULATION_OF_TOR_SIGNALING	0.443065	0.0426921	0.498174	0.025662	0.131108	0.0839213	0.000187889	0.14081	0.505004	0.0371086	0.000325632	0.135553	0.0994561	0.0915474	6.58648e-05	0.150354
GO_POSITIVE_REGULATION_OF_GLIAL_CELL_DIFFERENTIATION	0.979545	-0.00142772	0.193998	0.0491851	0.819631	0.0126967	0.243067	-0.0442109	0.771138	0.0161968	0.807259	-0.00924391	0.409088	0.0459433	0.728052	0.0131749
GO_MALE_SEX_DETERMINATION	0.000736125	-0.186329	0.0367937	-0.0789951	0.00107796	-0.180554	9.85347e-07	-0.183877	0.00130467	-0.177598	1.45752e-05	-0.163157	0.00937801	-0.143912	0.853184	0.00701198
GO_TYPE_B_PANCREATIC_CELL_DEVELOPMENT	0.0706814	-0.100396	5.11307e-05	-0.152575	0.0332752	-0.118123	1.09357e-07	-0.1992	0.0329291	-0.118354	2.27744e-08	-0.20944	0.00700875	-0.149307	6.52187e-07	-0.18685
GO_REGULATION_OF_SUPEROXIDE_ANION_GENERATION	1.64996e-11	0.362176	3.89245e-35	0.444046	2.85541e-15	0.419313	7.74755e-36	0.448181	6.26165e-19	0.466069	1.25796e-48	0.515102	1.61595e-10	0.345053	5.46503e-32	0.424748
GO_ANTIGEN_RECEPTOR_MEDIATED_SIGNALING_PATHWAY	1.4036e-25	0.536115	4.08155e-51	0.526562	6.8039e-41	0.653074	2.17832e-79	0.632536	3.02315e-30	0.577053	6.98169e-97	0.682253	3.7375e-08	0.299367	2.73008e-29	0.407144
GO_POSITIVE_REGULATION_OF_MITOTIC_CELL_CYCLE	0.0861126	0.0953519	0.00804125	0.100172	0.129773	0.0842121	0.0191152	0.088615	0.448349	0.0421996	0.000679555	0.128211	0.0901188	-0.0941628	0.133718	-0.0567759
GO_LYMPHOCYTE_COSTIMULATION	1.20025e-25	0.536753	9.89303e-72	0.60749	2.95263e-43	0.667404	2.21206e-71	0.606291	5.62355e-36	0.620522	7.09396e-105	0.702086	8.5866e-12	0.366895	5.29496e-34	0.437238
GO_REGULATION_OF_SERINE_TYPE_PEPTIDASE_ACTIVITY	7.83894e-07	0.269923	0.658663	0.0167377	8.18863e-05	0.216719	3.77251e-11	0.246683	1.95242e-05	0.234465	4.57601e-08	0.20495	0.01975	0.129259	0.0843055	0.0653393
GO_NEGATIVE_REGULATION_OF_STEROID_METABOLIC_PROCESS	0.00294034	0.164472	1.04173e-07	0.199525	0.00263576	0.166293	6.71223e-10	0.23073	0.0293463	0.120881	3.06386e-14	0.281948	0.0185911	-0.1305	0.772356	0.0109614
GO_COFACTOR_METABOLIC_PROCESS	0.0770021	0.0982316	0.489856	-0.0261609	0.0508719	0.108407	1.17253e-06	0.18261	0.323602	0.0549238	0.0032685	0.111104	0.177377	-0.0750056	0.0278837	0.0831754
GO_BARBED_END_ACTIN_FILAMENT_CAPPING	4.08973e-19	0.468252	7.46208e-46	0.501797	4.08954e-27	0.550218	9.46716e-50	0.520329	2.70034e-21	0.492871	1.03715e-72	0.610822	3.87975e-06	0.252942	1.81685e-24	0.372783
GO_CELL_MIGRATION_INVOLVED_IN_SPROUTING_ANGIOGENESIS	7.5957e-05	0.217685	0.00917427	0.0984853	0.000890249	0.183472	0.000388359	0.133828	5.39568e-05	0.22203	8.26241e-08	0.201068	0.0888707	-0.0945287	0.134835	-0.0566136
GO_NEGATIVE_REGULATION_OF_INTRACELLULAR_ESTROGEN_RECEPTOR_SIGNALING_PATHWAY	0.519609	0.0358465	0.201919	0.0483249	0.15511	0.0790435	0.180194	-0.0507476	0.866655	0.0093497	0.954284	-0.00217224	0.051013	-0.108341	0.00396777	-0.10883
GO_REGULATION_OF_TYPE_2_IMMUNE_RESPONSE	9.53015e-28	0.55584	2.34688e-59	0.56164	3.71106e-37	0.6287	1.32884e-70	0.603601	3.87322e-39	0.641898	4.20272e-105	0.702627	9.91733e-10	0.330655	6.1955e-31	0.417993
GO_3_UTR_MEDIATED_MRNA_STABILIZATION	1.0143e-07	0.290074	9.45496e-06	0.166656	8.1325e-06	0.24466	2.38847e-09	0.223308	1.93975e-06	0.260448	2.24506e-13	0.27259	0.231664	0.0665296	0.0102949	0.0969908
GO_DRUG_CATABOLIC_PROCESS	0.0214589	-0.127541	0.0119201	-0.0950619	0.0561445	-0.106053	2.52238e-12	-0.260715	0.0837228	-0.0960826	4.53106e-14	-0.280137	0.0147857	0.135113	0.0178361	-0.089584
GO_POSITIVE_REGULATION_OF_RHO_PROTEIN_SIGNAL_TRANSDUCTION	0.0510202	0.108338	2.41917e-10	0.236517	0.00890079	0.144893	0.000288186	0.136736	0.574599	0.0312477	9.02019e-10	0.229024	0.0451036	-0.111228	0.0036416	0.109841
GO_PRIMITIVE_STREAK_FORMATION	1.11832e-05	0.241003	2.43672e-14	0.283001	1.31569e-07	0.287597	2.40779e-12	0.260949	8.01133e-07	0.2697	9.53083e-23	0.359467	0.0777185	0.0979955	2.07035e-09	0.224156
GO_RESPONSE_TO_PHENYLPROPANOID	0.0193942	0.129633	0.0685802	-0.0689246	0.190038	0.0728756	0.0463898	0.0753656	0.0320063	0.118982	0.109941	0.0605121	0.541218	0.0340119	0.174226	0.0514507
GO_REGULATION_OF_EPITHELIAL_CELL_MIGRATION	1.03908e-08	0.310821	1.23521e-10	0.240248	1.63986e-11	0.362221	0.000298713	0.13639	4.30321e-09	0.318434	1.36188e-10	0.23971	0.79435	0.0145143	0.234935	0.0449823
GO_POSITIVE_REGULATION_OF_NOTCH_SIGNALING_PATHWAY	0.291142	0.058731	0.173158	0.0515784	0.381044	0.0487493	6.85211e-11	0.243468	0.190376	0.0728203	1.33608e-10	0.239816	0.0327118	0.118501	1.11721e-05	0.165315
GO_CELL_DEATH	2.20546e-22	0.50445	5.5182e-48	0.512073	1.37268e-34	0.610592	1.44758e-61	0.570379	6.73395e-27	0.548269	3.01088e-89	0.661712	0.000209901	0.204231	1.68055e-20	0.341067
GO_CELLULAR_IRON_ION_HOMEOSTASIS	7.06761e-10	0.3334	1.86408e-14	0.284228	4.49241e-15	0.416581	3.2959e-25	0.378337	6.3495e-12	0.36905	1.32945e-29	0.409237	0.0320277	0.118967	1.08711e-05	0.165536
GO_CONTRACTILE_ACTIN_FILAMENT_BUNDLE_ASSEMBLY	0.0150066	0.134818	2.30125e-05	0.159385	0.00638025	0.151012	1.63039e-06	0.180183	0.107087	0.0895512	1.17292e-11	0.252848	0.0378018	-0.115271	0.50031	0.0255347
GO_MACROMOLECULE_DEACYLATION	0.000926616	-0.182865	1.39421e-09	-0.226487	0.00402054	-0.159157	1.6326e-21	-0.349512	0.000705296	-0.186966	5.3662e-21	-0.345234	0.057509	-0.105473	9.62249e-06	-0.166515
GO_TRANSLATIONAL_INITIATION	0.418726	-0.0450056	0.000424051	-0.13296	0.334377	-0.0537155	0.246757	0.0438669	0.303644	-0.057233	0.572701	-0.0213712	0.893431	-0.00745961	0.653851	0.0169899
GO_ACTIVATION_OF_NF_KAPPAB_INDUCING_KINASE_ACTIVITY	9.2434e-22	0.49788	1.59001e-46	0.505073	3.32567e-28	0.559838	2.00273e-27	0.39433	4.22555e-25	0.531579	4.93461e-46	0.502677	2.34686e-05	0.232264	1.68265e-06	0.179949
GO_SYNAPTIC_TRANSMISSION_CHOLINERGIC	0.522484	-0.0356002	6.63536e-14	-0.278359	0.0693405	-0.100876	5.52409e-07	-0.188033	0.318265	-0.0555319	4.29618e-12	-0.258019	0.886207	0.00796863	1.65956e-07	-0.196385
GO_NEGATIVE_REGULATION_OF_CYTOKINE_PRODUCTION_INVOLVED_IN_IMMUNE_RESPONSE	1.68363e-26	0.544653	6.43594e-62	0.571747	2.14139e-37	0.630325	5.87154e-65	0.583302	3.16607e-41	0.655137	2.16613e-96	0.680979	6.86154e-12	0.368498	1.31044e-44	0.49563
GO_REGULATION_OF_TOLL_LIKE_RECEPTOR_4_SIGNALING_PATHWAY	6.13317e-13	0.385216	5.87969e-38	0.460349	7.73955e-17	0.440224	3.82216e-41	0.477767	4.38574e-18	0.455888	3.26691e-56	0.548742	0.000127757	0.210909	6.07403e-08	0.203099
GO_POSITIVE_REGULATION_OF_CELLULAR_PROTEIN_LOCALIZATION	5.16659e-05	0.222575	6.85865e-17	0.308616	5.6401e-07	0.273277	3.44895e-14	0.281401	0.000209625	0.204249	7.04692e-28	0.397498	0.68135	-0.0228623	0.000138081	0.143676
GO_PLASMA_MEMBRANE_ORGANIZATION	0.460601	0.04107	0.00318223	0.111415	0.0963591	0.0923923	0.30844	-0.038578	0.370638	0.0498223	0.380666	0.033209	0.153503	-0.0793514	0.613333	-0.0191455
GO_REGULATION_OF_NEUROTRANSMITTER_SECRETION	2.33536e-10	-0.34219	1.28511e-16	-0.305997	2.56457e-11	-0.358946	2.05668e-27	-0.394249	9.73446e-13	-0.382091	5.26956e-28	-0.398373	3.46249e-08	-0.300065	3.12819e-16	-0.302239
GO_POSITIVE_REGULATION_OF_PROTEIN_CATABOLIC_PROCESS	6.84634e-09	0.314451	1.25634e-08	0.213189	2.44331e-09	0.323212	2.03262e-35	0.445717	3.17602e-09	0.321009	5.14898e-35	0.443324	0.0313487	0.119438	2.65817e-09	0.22267
GO_ACTIVATION_OF_ADENYLATE_CYCLASE_ACTIVITY	2.09404e-06	-0.259631	1.2607e-07	-0.198245	0.000135353	-0.210143	1.88503e-13	-0.273426	1.47709e-05	-0.237762	3.58691e-11	-0.246953	4.32959e-05	-0.224782	2.0951e-07	-0.194795
GO_WHITE_FAT_CELL_DIFFERENTIATION	0.00504807	-0.15519	0.0422267	0.0768539	0.00552694	-0.153585	0.17861	-0.0509325	2.29866e-05	-0.232513	0.667924	-0.0162543	0.000610431	-0.189103	0.404469	0.0315808
GO_OOGENESIS	0.0125109	-0.138397	0.00903292	-0.0986852	0.00314683	-0.163332	2.84249e-05	-0.15761	0.00936399	-0.143941	1.32776e-06	-0.181698	0.336574	-0.0534721	0.000310689	-0.136009
GO_REGULATION_OF_SHORT_TERM_NEURONAL_SYNAPTIC_PLASTICITY	3.15945e-17	-0.4452	4.91951e-31	-0.418641	1.04246e-20	-0.48644	1.93881e-50	-0.523489	9.61253e-22	-0.497699	6.31999e-59	-0.559908	1.63749e-09	-0.32654	2.12418e-27	-0.394151
GO_ALDEHYDE_CATABOLIC_PROCESS	0.172367	-0.0758797	0.961397	0.00183396	0.00369677	-0.160598	2.86323e-09	0.222226	0.167496	-0.0767477	3.53203e-06	0.174361	0.460854	0.0410468	1.21766e-08	0.213384
GO_RESPONSE_TO_TYPE_I_INTERFERON	1.26948e-22	0.506945	1.28505e-57	0.554577	2.60252e-32	0.593492	3.98075e-53	0.535511	2.46272e-34	0.608737	9.93787e-72	0.607483	1.74342e-14	0.408255	1.46877e-27	0.395274
GO_MITOCHONDRIAL_RESPIRATORY_CHAIN_COMPLEX_ASSEMBLY	0.222848	-0.0678008	1.79342e-08	-0.210954	0.00384117	-0.159942	0.0208817	0.0873659	0.452763	-0.0417906	0.22947	-0.0455113	0.132188	0.0836875	0.212192	0.0472452
GO_HYALURONAN_CATABOLIC_PROCESS	7.20333e-23	0.509483	6.81588e-33	0.43042	5.79229e-34	0.606	3.70685e-52	0.531232	3.7952e-25	0.532024	5.67375e-69	0.597886	0.00227654	0.168705	4.3685e-22	0.354176
GO_NEUROTRANSMITTER_BIOSYNTHETIC_PROCESS	8.92864e-07	-0.268584	1.48599e-08	-0.212138	1.61138e-09	-0.326673	2.68893e-19	-0.330674	4.03069e-11	-0.355596	1.33152e-18	-0.324491	0.00103155	-0.181229	5.95811e-14	-0.278863
GO_PENTOSE_PHOSPHATE_SHUNT	6.89031e-14	0.399573	2.84625e-19	0.330457	5.58042e-18	0.454604	3.89432e-40	0.472365	1.0243e-13	0.397021	1.0459e-44	0.49612	1.15973e-05	0.240582	8.57206e-11	0.24225
GO_CYTOKINE_MEDIATED_SIGNALING_PATHWAY	5.02401e-32	0.591273	3.05767e-65	0.584356	1.35179e-45	0.680848	1.08363e-80	0.63658	9.26092e-46	0.681765	1.64303e-113	0.721809	6.40033e-13	0.384929	1.54008e-35	0.446428
GO_ATP_GENERATION_FROM_ADP	0.000597201	0.189425	0.0542773	0.0728293	0.00461057	0.156781	3.18461e-08	0.207295	0.111283	0.0885009	3.37094e-09	0.221248	0.0533469	-0.107278	0.000526081	0.130808
GO_NEGATIVE_REGULATION_OF_LOCOMOTION	3.173e-06	0.255144	5.35259e-12	0.256897	4.34467e-11	0.355036	0.000930479	0.124956	9.35006e-08	0.290844	2.56895e-09	0.222874	0.499547	-0.0375851	0.0163286	0.0908073
GO_IMP_METABOLIC_PROCESS	0.00156452	0.174742	0.0508796	0.0738814	0.00856645	0.145608	0.000209444	0.139786	0.0916212	0.0937278	1.73919e-05	0.161708	0.464297	-0.0407324	0.732583	-0.0129466
GO_NCRNA_3_END_PROCESSING	0.393011	-0.0475372	0.000136205	-0.143802	0.0125173	-0.138387	0.00143968	0.120305	0.835411	-0.011569	0.522248	0.0242424	0.201398	0.0710515	0.149868	0.0545228
GO_LYMPH_NODE_DEVELOPMENT	1.77479e-21	0.494842	1.07224e-54	0.542315	3.63934e-30	0.576393	4.5291e-68	0.594673	6.74689e-28	0.557157	7.31537e-90	0.663428	4.09104e-10	0.337775	2.19931e-41	0.479039
GO_REGULATION_OF_CELLULAR_COMPONENT_SIZE	0.00989128	0.142906	1.95489e-09	0.224496	0.00134548	0.177117	0.365532	0.0342768	0.0636704	0.102991	1.34926e-05	0.163787	0.101534	-0.0909921	0.956708	-0.00205694
GO_MITOCHONDRIAL_TRANSPORT	0.586374	0.0302909	9.82791e-06	-0.166346	0.354628	-0.0515102	0.000322194	0.135656	0.318202	-0.0555392	0.434004	0.0296381	0.301459	-0.0574918	0.698912	0.0146552
GO_SULFUR_COMPOUND_BIOSYNTHETIC_PROCESS	0.000241008	0.202335	0.0207358	0.0874655	0.000637666	0.18846	9.07397e-07	0.184474	0.0119005	0.139367	1.1873e-06	0.182518	0.509973	-0.0366771	0.000705646	0.127825
GO_T_CELL_PROLIFERATION	6.80116e-25	0.529599	3.55903e-73	0.612389	2.41937e-44	0.673736	3.14348e-63	0.576788	7.60687e-36	0.619598	3.06567e-102	0.695723	4.71092e-07	0.275093	5.8015e-31	0.418177
GO_REGULATION_OF_RESPIRATORY_GASEOUS_EXCHANGE_BY_NEUROLOGICAL_SYSTEM_PROCESS	4.51358e-10	-0.336993	1.20663e-10	-0.240377	1.7065e-12	-0.378248	2.9996e-33	-0.432627	3.47989e-18	-0.457116	2.43091e-30	-0.414121	2.42165e-09	-0.323287	3.22181e-19	-0.329982
GO_PROTEIN_TARGETING	0.176592	-0.0751413	0.00416479	-0.108255	0.110295	-0.0887455	0.241423	0.0443655	0.0162847	-0.133184	0.87047	-0.00617856	0.0377163	-0.115322	0.354202	-0.0350943
GO_POSITIVE_REGULATION_OF_CHOLESTEROL_EFFLUX	0.0238257	0.125346	0.001003	0.124168	0.000440267	0.193854	0.467491	-0.0275254	0.016088	0.133428	0.932637	-0.00320284	0.130939	0.083958	0.398192	0.0320044
GO_SINGLE_ORGANISM_BIOSYNTHETIC_PROCESS	0.000484584	0.192471	0.505128	0.0252483	0.0211438	0.127848	6.22709e-15	0.289187	0.105033	0.090077	1.0694e-09	0.228036	0.525375	0.0353532	1.85564e-05	0.161173
GO_POSITIVE_REGULATION_OF_VIRAL_GENOME_REPLICATION	0.126298	0.0849801	1.81898e-06	0.17937	0.00468106	0.156515	2.17825e-06	0.178023	0.481532	0.039178	1.07209e-08	0.214177	0.114626	-0.0876864	0.652726	-0.017049
GO_NEGATIVE_REGULATION_OF_INNATE_IMMUNE_RESPONSE	6.20149e-29	0.566105	7.65962e-69	0.597424	8.66964e-45	0.676289	9.45911e-68	0.593525	5.3339e-43	0.665884	2.42631e-98	0.685995	8.09715e-17	0.439971	1.02486e-39	0.470084
GO_REGULATION_OF_ALPHA_AMINO_3_HYDROXY_5_METHYL_4_ISOXAZOLE_PROPIONATE_SELECTIVE_GLUTAMATE_RECEPTOR_ACTIVITY	1.25805e-16	-0.437491	1.79242e-25	-0.380293	1.63109e-19	-0.472911	1.48683e-43	-0.490303	9.25989e-22	-0.497872	1.20872e-48	-0.515184	3.30263e-12	-0.373662	8.65947e-28	-0.396876
GO_REGULATION_OF_ENDOTHELIAL_CELL_DIFFERENTIATION	2.46762e-08	0.303136	0.00010024	0.1466	7.1158e-07	0.270914	0.002713	0.113252	2.95415e-09	0.321619	9.86648e-06	0.166315	0.277411	0.0604267	0.651912	0.0170918
GO_REGULATION_OF_NOREPINEPHRINE_SECRETION	0.026356	-0.1232	0.631953	-0.0181477	0.00818937	-0.146444	0.000226446	-0.139046	0.0127895	-0.137968	0.0153924	-0.0916179	0.117172	-0.0870783	0.0812812	-0.0659839
GO_GLIAL_CELL_DEVELOPMENT	0.0269873	-0.122692	6.35256e-05	0.150673	0.377594	-0.049103	0.265517	0.0421711	0.273948	-0.0608633	0.0226671	0.0861935	0.420081	0.0448748	0.000135288	0.143864
GO_MITOCHONDRIAL_TRANSLATION	0.706532	0.0209639	0.000189362	-0.140736	0.281224	-0.0599502	3.49043e-07	0.191265	0.69173	0.0220767	0.0834382	0.0655222	0.22836	0.0670019	0.216482	0.0468056
GO_REGULATION_OF_RETINOIC_ACID_RECEPTOR_SIGNALING_PATHWAY	0.0519148	0.107926	0.258485	0.0427967	0.0254478	0.123949	0.123158	-0.0583654	0.000136198	0.21006	0.361368	-0.0345754	0.000961342	0.182305	0.798156	-0.0096899
GO_STRIATED_MUSCLE_CELL_DIFFERENTIATION	0.457367	0.0413665	0.0662346	0.0695157	0.712394	0.0205255	0.00170437	-0.118462	0.57664	-0.0310811	0.697203	-0.0147427	0.0065255	-0.150605	0.00262736	-0.113618
GO_REGULATION_OF_SYSTEMIC_ARTERIAL_BLOOD_PRESSURE	9.00324e-06	0.243499	5.32537e-11	0.244832	1.25054e-05	0.239707	7.07905e-10	0.230424	2.39365e-05	0.232027	2.30788e-17	0.313099	0.248687	0.0641685	3.78062e-05	0.155184
GO_REGULATION_OF_SMOOTH_MUSCLE_CONTRACTION	9.94107e-09	0.311209	7.64444e-05	0.149033	3.42856e-07	0.278266	4.91687e-05	0.152916	5.55157e-08	0.295723	2.13966e-08	0.209836	0.353072	0.0516768	0.0470737	0.075132
GO_POLYOL_CATABOLIC_PROCESS	5.81302e-06	-0.248454	0.0045302	-0.10725	2.45398e-05	-0.231727	1.57613e-06	-0.180433	1.09957e-09	-0.329813	3.94704e-06	-0.173508	5.74559e-10	-0.335065	6.67351e-06	-0.169421
GO_SECOND_MESSENGER_MEDIATED_SIGNALING	0.14884	-0.0802587	0.675853	0.0158425	0.0376685	-0.115351	0.0306011	-0.081792	0.0736061	-0.099376	0.761122	-0.0115188	0.000378643	-0.19601	0.0101222	-0.0972114
GO_CELL_CELL_SIGNALING	0.0029689	-0.16431	1.05368e-10	-0.241121	0.000487197	-0.192394	6.45823e-13	-0.267476	5.89522e-05	-0.220913	2.35075e-13	-0.27237	0.000149157	-0.208849	1.39794e-09	-0.226471
GO_NEGATIVE_REGULATION_OF_B_CELL_ACTIVATION	5.66401e-23	0.510554	1.66821e-66	0.589008	4.84718e-36	0.620975	5.61534e-64	0.579625	7.41522e-34	0.605204	2.01796e-94	0.675812	7.96905e-07	0.269754	4.81528e-32	0.425096
GO_POSITIVE_REGULATION_OF_COAGULATION	1.03607e-19	0.475185	2.28117e-47	0.509137	6.33076e-33	0.598203	4.21463e-59	0.560617	1.27915e-23	0.517097	9.22312e-88	0.657515	0.00551438	0.153625	1.2371e-25	0.381477
GO_NEGATIVE_REGULATION_OF_PROTEIN_TYROSINE_KINASE_ACTIVITY	1.94727e-09	0.325104	7.14009e-09	0.216689	2.12462e-15	0.421082	2.30123e-14	0.283264	6.81846e-09	0.314486	9.36611e-17	0.30732	0.697956	-0.0216076	0.0681861	0.0690227
GO_LUNG_MORPHOGENESIS	2.53541e-10	0.341547	1.35249e-11	0.252105	6.02687e-13	0.385334	4.46544e-08	0.20511	9.2463e-14	0.397682	6.54105e-19	0.327256	0.00351963	0.161436	0.000942744	0.124819
GO_VENTRICULAR_CARDIAC_MUSCLE_CELL_DIFFERENTIATION	0.493245	0.0381388	0.0761249	0.0671292	0.320466	0.0552804	0.00265326	0.113506	0.613569	0.0281143	2.68684e-05	0.158085	0.00366827	-0.160731	0.214547	-0.0470031
GO_OXIDATIVE_DEMETHYLATION	0.3167	0.0557115	0.000166231	-0.141956	0.888165	0.00783063	0.0522754	-0.0734423	0.932153	-0.00474073	5.69815e-05	-0.151629	0.0538125	0.10707	0.0640386	-0.070085
GO_REGULATION_OF_MACROPHAGE_ACTIVATION	4.81215e-16	0.429814	7.11423e-23	0.360472	3.88058e-21	0.491158	3.94889e-30	0.412734	9.20282e-17	0.439252	1.6419e-39	0.468967	0.000832447	0.184486	5.882e-14	0.278923
GO_VASCULAR_ENDOTHELIAL_GROWTH_FACTOR_RECEPTOR_SIGNALING_PATHWAY	9.98475e-12	0.365812	9.24533e-45	0.496388	5.1413e-17	0.442506	4.61461e-27	0.391774	1.0286e-09	0.330358	1.19885e-52	0.533404	0.71561	0.0202856	3.15719e-11	0.247634
GO_POSITIVE_REGULATION_OF_MAPK_CASCADE	6.30852e-20	0.477652	6.71829e-49	0.516378	2.90577e-27	0.551547	8.48571e-38	0.459451	1.10025e-22	0.507588	9.97213e-66	0.586157	1.56791e-05	0.237061	4.40291e-21	0.34595
GO_MULTICELLULAR_ORGANISMAL_MACROMOLECULE_METABOLIC_PROCESS	2.28199e-23	0.514568	2.66055e-30	0.413863	3.23667e-29	0.568496	3.75347e-49	0.517557	7.28749e-30	0.573907	2.38723e-60	0.565597	0.000166115	0.207404	3.20242e-17	0.311759
GO_CARBOHYDRATE_DERIVATIVE_CATABOLIC_PROCESS	1.97172e-30	0.57857	7.65681e-31	0.417396	8.83632e-42	0.658543	2.41172e-57	0.553451	9.10012e-34	0.604543	3.94254e-59	0.560734	2.27364e-07	0.28231	6.70033e-21	0.344428
GO_L_AMINO_ACID_TRANSPORT	1.47874e-05	-0.237749	0.000248954	-0.138142	7.81969e-06	-0.245106	1.0139e-12	-0.265259	1.04173e-08	-0.310799	9.22447e-13	-0.265725	2.58499e-06	-0.257367	4.58779e-10	-0.232906
GO_POSITIVE_REGULATION_OF_ACTION_POTENTIAL	0.348316	-0.0521887	0.0678068	-0.0691177	0.286362	-0.0593151	5.53959e-05	-0.151876	0.0867198	-0.0951689	0.00242079	-0.114548	0.00103737	-0.181143	0.00134494	-0.121041
GO_REGULATION_OF_MUSCLE_CONTRACTION	0.00599617	0.152129	0.0285335	0.0828345	0.0223254	0.126714	0.0170959	0.0901729	0.00551512	0.153623	0.000450694	0.132355	0.412957	-0.0455653	0.24912	0.0436485
GO_REGULATION_OF_CHOLESTEROL_EFFLUX	0.346893	0.0523428	0.0397891	0.0777839	0.019389	0.129639	0.0190069	-0.0886948	0.571884	0.0314695	0.0891859	-0.0643374	0.544369	0.0337475	0.664646	-0.016425
GO_REGULATION_OF_EXOCYTOSIS	0.433493	-0.043593	0.6184	-0.0188727	0.22632	-0.0672959	0.0214629	-0.086975	0.170025	-0.0762947	0.199672	-0.0485664	0.00138336	-0.176682	0.00232126	-0.115023
GO_NEGATIVE_REGULATION_OF_TOLL_LIKE_RECEPTOR_SIGNALING_PATHWAY	2.75216e-21	0.492782	5.19393e-55	0.543661	2.95708e-31	0.585207	2.99042e-29	0.406878	6.12675e-25	0.530035	6.46028e-58	0.555803	1.24371e-06	0.265142	4.48145e-17	0.310377
GO_ANION_TRANSMEMBRANE_TRANSPORT	0.733488	-0.0189583	0.384996	-0.0329083	0.876231	0.00867262	0.0018993	-0.117267	0.2283	-0.0670105	0.0226114	-0.0862288	0.048278	-0.10964	0.00463274	-0.106982
GO_POSITIVE_REGULATION_OF_PROTEIN_LOCALIZATION_TO_CELL_SURFACE	0.0118101	-0.139514	0.387605	0.0327281	0.566246	-0.0319319	0.0373008	-0.0787843	0.0740698	-0.0992172	0.518568	-0.0244572	0.0127371	-0.138048	0.113216	-0.0599622
GO_PROTEIN_MODIFICATION_BY_SMALL_PROTEIN_CONJUGATION_OR_REMOVAL	0.0188714	-0.130194	0.00896017	-0.0987892	0.0326087	-0.118571	1.89001e-05	-0.161021	0.000707805	-0.186913	5.52148e-05	-0.151905	0.000121654	-0.211556	2.84643e-11	-0.248185
GO_RENAL_VESICLE_DEVELOPMENT	2.3202e-08	0.303691	5.99069e-10	0.231382	1.27756e-07	0.287878	1.42892e-07	0.1974	1.61033e-09	0.326679	3.92617e-11	0.24647	0.0297191	0.120606	0.603261	0.0196908
GO_REGULATION_OF_BODY_FLUID_LEVELS	5.30585e-24	0.520901	1.9828e-47	0.509428	6.24745e-34	0.605756	1.6699e-38	0.463409	2.66611e-27	0.55188	1.0265e-67	0.593398	7.65498e-05	0.217586	2.91995e-18	0.321404
GO_REGULATION_OF_HORMONE_LEVELS	0.457905	-0.041317	0.005021	-0.106011	0.944489	-0.00387724	0.000920759	-0.125066	0.688333	-0.0223334	0.00282284	-0.112797	0.0115387	-0.139963	0.000219432	-0.139345
GO_BONE_CELL_DEVELOPMENT	0.61231	0.0282141	4.03715e-10	0.233632	0.00380003	0.160127	0.359933	-0.0346788	0.0689497	0.101017	0.0278422	0.0831974	0.696745	0.0216987	0.0115051	0.0955312
GO_REGULATION_OF_DEFENSE_RESPONSE	1.71471e-33	0.602488	2.08589e-65	0.584972	1.47024e-52	0.717008	8.12033e-84	0.646038	9.61741e-41	0.652135	1.40774e-118	0.732638	4.49042e-09	0.318072	1.93947e-32	0.427584
GO_NEGATIVE_REGULATION_OF_NEUROLOGICAL_SYSTEM_PROCESS	0.1717	0.0759975	0.867472	-0.00632287	0.0359295	0.116413	0.81162	0.00903068	0.452274	0.0418358	0.285528	0.0404507	0.159194	-0.0782717	1.86517e-06	-0.179183
GO_PYRIMIDINE_NUCLEOSIDE_MONOPHOSPHATE_METABOLIC_PROCESS	0.790574	0.0147871	0.272805	0.0415346	0.542607	-0.0338952	6.11188e-11	0.244088	0.391128	-0.0477264	7.45464e-09	0.216424	0.632792	0.0266014	2.84784e-08	0.208012
GO_POSITIVE_REGULATION_OF_HEART_GROWTH	2.87544e-08	-0.301754	4.66344e-06	-0.172221	2.42384e-06	-0.258061	4.19803e-17	-0.310646	1.17614e-09	-0.329263	1.20554e-12	-0.264402	6.17643e-08	-0.294732	3.52023e-09	-0.220987
GO_NEGATIVE_REGULATION_OF_LIPID_BIOSYNTHETIC_PROCESS	1.44323e-08	0.307928	1.38197e-21	0.350106	3.4211e-10	0.339191	5.63747e-30	0.411713	3.03184e-07	0.279483	2.13365e-37	0.457183	0.310804	-0.0563934	4.1161e-08	0.205638
GO_NEGATIVE_REGULATION_OF_PEPTIDE_SECRETION	0.420446	-0.0448396	0.00681928	-0.102248	0.456912	-0.0414083	0.00424956	-0.108015	0.859662	-0.00984505	0.0213813	-0.0870293	0.852534	0.0103507	0.0198607	-0.0880761
GO_VESICLE_TARGETING	7.49998e-13	0.383859	1.1538e-12	0.26462	6.32982e-15	0.414498	1.2617e-27	0.395736	1.54454e-08	0.307327	4.4659e-32	0.425302	0.456945	-0.0414052	0.0953359	0.0631358
GO_REGULATION_OF_PROTEIN_EXPORT_FROM_NUCLEUS	0.237224	-0.0657453	0.969051	-0.00147014	0.686438	-0.0224766	0.000367181	-0.134379	0.0824581	-0.0964761	0.0865562	-0.0648716	0.0378856	-0.115221	0.123393	-0.0583289
GO_LAYER_FORMATION_IN_CEREBRAL_CORTEX	3.92424e-17	-0.444003	2.0861e-22	-0.356757	2.31219e-22	-0.504235	1.64256e-30	-0.415236	1.67857e-21	-0.495103	4.25827e-33	-0.431687	1.0977e-08	-0.31034	1.07978e-23	-0.366867
GO_POSITIVE_REGULATION_OF_ACTIN_CYTOSKELETON_REORGANIZATION	0.461714	0.0409681	6.2427e-05	0.150827	0.612725	-0.0281812	8.92378e-07	0.184595	0.215201	0.0689328	6.76478e-08	0.202391	0.0550532	0.106524	4.47899e-07	0.189516
GO_SEX_DETERMINATION	0.0256244	-0.123802	0.00984607	-0.0975711	0.0366291	-0.115981	0.00173738	-0.118251	0.149174	-0.0801931	0.000704476	-0.127842	0.416988	-0.0451737	0.264697	0.0422435
GO_OLIGOSACCHARIDE_CATABOLIC_PROCESS	4.90121e-20	0.478899	5.66434e-40	0.471484	3.36463e-34	0.607741	1.95095e-35	0.445822	5.06056e-20	0.478742	1.13999e-46	0.505773	0.000147485	0.208999	1.13541e-13	0.275834
GO_B_CELL_PROLIFERATION	2.65597e-12	0.375184	4.96953e-39	0.466326	2.48958e-20	0.482222	9.13693e-27	0.389665	1.05917e-12	0.381516	1.96726e-42	0.484533	0.0273439	0.12241	9.99586e-19	0.32561
GO_POSITIVE_REGULATION_OF_DNA_METABOLIC_PROCESS	7.11453e-05	0.218523	0.000214324	0.139568	0.00221027	0.169188	4.22139e-18	0.319942	0.0244514	0.124798	7.41816e-17	0.308291	0.236333	-0.0658701	0.0107561	0.0964174
GO_PROTEASOME_ASSEMBLY	1.53493e-06	0.262931	0.164558	0.0526287	7.54317e-05	0.217774	2.80157e-24	0.371357	6.7228e-07	0.271494	1.78798e-16	0.304608	0.0405396	0.113684	9.48331e-09	0.214939
GO_ESTABLISHMENT_OF_PROTEIN_LOCALIZATION_TO_ENDOPLASMIC_RETICULUM	0.320168	-0.0553144	0.00270082	-0.113303	0.156343	-0.0788089	0.0688621	0.0688547	0.321946	-0.0551118	0.872577	0.00607719	0.735088	0.01884	0.22562	0.0458894
GO_PYRIMIDINE_NUCLEOSIDE_TRIPHOSPHATE_BIOSYNTHETIC_PROCESS	0.45919	0.0411992	0.149217	0.05461	0.971189	-0.00201114	3.89627e-16	0.301304	0.831915	0.0118184	1.04858e-11	0.253431	0.528385	0.0350968	2.28234e-08	0.209426
GO_NEGATIVE_REGULATION_OF_ENDOCYTOSIS	1.57955e-05	0.236974	7.48404e-23	0.360298	7.82641e-12	0.367558	1.474e-25	0.380918	2.89811e-05	0.229714	2.01655e-33	0.433689	0.961074	-0.00271772	3.8297e-12	0.258603
GO_RESPONSE_TO_POTASSIUM_ION	5.19756e-08	-0.296334	7.66133e-10	-0.229968	6.63252e-10	-0.333912	5.52121e-21	-0.345131	1.74148e-07	-0.284901	9.45017e-24	-0.367314	0.00015437	-0.208389	1.27282e-07	-0.19818
GO_REGULATION_OF_LYMPHOCYTE_APOPTOTIC_PROCESS	2.39353e-32	0.593773	3.3827e-71	0.605656	6.83137e-54	0.723341	2.69243e-88	0.659033	1.05314e-45	0.681454	3.44241e-118	0.731827	5.32716e-12	0.370296	1.3867e-39	0.469368
GO_SMALL_MOLECULE_METABOLIC_PROCESS	0.00103514	0.181176	0.286812	0.0403431	0.00923788	0.144195	9.88655e-08	0.199874	0.0594104	0.104685	2.67453e-05	0.158124	0.777271	0.0157509	0.000381877	0.133994
GO_THYMUS_DEVELOPMENT	0.327692	0.0544621	0.0110216	0.0960972	0.0354751	0.116698	0.748311	-0.0121576	0.0532663	0.107314	0.0967703	0.0628645	0.942384	-0.00402453	0.404328	-0.0315903
GO_NEGATIVE_REGULATION_OF_ADHERENS_JUNCTION_ORGANIZATION	0.0773239	0.0981253	2.87844e-05	0.157504	0.0256317	0.123795	0.000461156	0.132127	0.55727	0.0326726	4.4607e-06	0.172565	0.000838256	-0.184381	0.500878	0.0255008
GO_HOMEOSTATIC_PROCESS	1.36557e-10	0.346352	9.11268e-22	0.351584	1.03752e-14	0.411469	2.56249e-19	0.330858	4.56927e-10	0.336896	4.6631e-31	0.418791	0.985545	0.00100888	3.17877e-05	0.156663
GO_CEREBELLAR_CORTEX_MORPHOGENESIS	5.24076e-20	-0.478569	2.49186e-23	-0.364048	9.37872e-22	-0.497813	1.15127e-53	-0.537864	1.65881e-26	-0.544712	1.4179e-53	-0.53747	1.71388e-12	-0.378218	1.78259e-28	-0.401615
GO_POSITIVE_REGULATION_OF_CYTOPLASMIC_TRANSPORT	7.6681e-15	0.413326	7.93563e-32	0.42372	3.49822e-20	0.480558	1.71736e-21	0.349331	4.5822e-15	0.416461	1.41643e-41	0.480048	0.0879692	0.0947955	1.04137e-11	0.253466
GO_MORPHOGENESIS_OF_AN_EPITHELIUM	4.67939e-09	0.31772	3.24244e-20	0.338639	1.60686e-10	0.345097	1.57322e-10	0.238913	3.29182e-11	0.357101	7.42986e-23	0.360323	0.1018	0.0909217	8.48846e-08	0.200889
GO_OSTEOBLAST_DIFFERENTIATION	0.00372302	0.160477	0.0566636	0.0721228	0.00220557	0.169223	0.210983	0.0473704	0.00062486	0.188759	0.0113118	0.0957548	0.0333144	-0.118097	0.129744	-0.0573623
GO_REGULATION_OF_STRIATED_MUSCLE_CELL_DIFFERENTIATION	2.43427e-09	0.323243	1.59554e-13	0.274221	8.94688e-10	0.331493	2.39034e-13	0.27229	9.47791e-09	0.311626	1.20049e-24	0.374141	0.122322	0.0858793	7.32017e-10	0.230231
GO_DEFENSE_RESPONSE_TO_VIRUS	3.01717e-27	0.551401	4.01937e-70	0.601928	7.26524e-40	0.646583	1.3726e-60	0.566548	8.8707e-38	0.632909	4.13887e-87	0.655652	3.71848e-12	0.372831	4.02793e-28	0.39918
GO_SENSORY_PERCEPTION_OF_CHEMICAL_STIMULUS	0.663067	0.0242572	6.08287e-06	-0.170149	0.624881	-0.0272216	5.85393e-26	-0.383852	0.886473	0.0079499	4.8913e-23	-0.361754	0.943388	0.00395426	3.68694e-08	-0.206351
GO_REGULATION_OF_RUFFLE_ASSEMBLY	4.42269e-05	0.224517	2.49379e-09	0.223051	2.88805e-07	0.279963	8.02897e-13	0.266408	6.24315e-09	0.315247	1.61328e-13	0.274168	0.0167282	0.132643	1.14351e-15	0.296665
GO_CELLULAR_PIGMENTATION	4.64988e-10	0.336756	2.28466e-11	0.24935	3.57669e-12	0.373103	2.21243e-19	0.331418	7.56627e-15	0.413408	1.22769e-24	0.374068	8.25714e-05	0.216611	0.000489728	0.131527
GO_NEGATIVE_REGULATION_OF_CALCIUM_ION_DEPENDENT_EXOCYTOSIS	2.62558e-06	-0.257199	0.00101832	0.124008	2.47855e-07	-0.281465	1.3277e-05	-0.163918	8.17333e-07	-0.269494	0.238885	-0.0446053	0.000283854	-0.200066	0.00162598	-0.118979
GO_VACUOLAR_TRANSPORT	0.683926	0.0226669	0.000322091	0.135659	0.0268908	0.122769	0.15455	-0.0539045	0.898581	0.00709715	0.658734	0.0167339	0.0106524	-0.141497	0.000130265	-0.144212
GO_NEGATIVE_REGULATION_OF_CELL_CELL_ADHESION	1.27939e-27	0.554712	1.08339e-69	0.600421	2.11355e-41	0.65622	1.4805e-60	0.566418	2.11094e-38	0.637068	4.34814e-96	0.680192	2.1105e-08	0.304542	2.3786e-34	0.439341
GO_POSITIVE_REGULATION_OF_VIRAL_RELEASE_FROM_HOST_CELL	0.335997	-0.0535359	2.62451e-08	-0.208535	0.452935	-0.0417747	0.000142907	-0.143359	0.0627495	-0.103349	1.48683e-07	-0.197131	0.000135797	-0.210099	8.73166e-06	-0.167292
GO_LEUKOCYTE_MEDIATED_CYTOTOXICITY	5.74197e-27	0.548893	9.03486e-46	0.50139	4.08984e-34	0.607117	1.74256e-74	0.616761	1.20311e-39	0.64518	3.64692e-95	0.677774	6.71596e-13	0.384605	4.46939e-34	0.437684
GO_POSITIVE_REGULATION_OF_VACUOLAR_TRANSPORT	0.0415915	0.113098	2.25115e-20	0.339989	0.00104571	0.18102	1.90861e-07	0.195433	0.0456891	0.110928	1.81347e-15	0.294652	0.428373	0.0440795	1.00366e-06	0.183743
GO_POSITIVE_REGULATION_OF_LYASE_ACTIVITY	4.3634e-07	-0.275862	2.11028e-11	-0.249769	9.54961e-06	-0.242823	9.86292e-17	-0.307104	8.56013e-06	-0.244076	8.44734e-16	-0.297978	0.000346062	-0.197285	1.438e-08	-0.212344
GO_ENTRAINMENT_OF_CIRCADIAN_CLOCK_BY_PHOTOPERIOD	3.64283e-06	-0.253634	0.00221883	-0.115531	6.05762e-07	-0.272553	0.214335	-0.0470249	3.45763e-05	-0.227559	0.0570458	-0.072012	0.00111876	-0.179982	0.116799	-0.0593745
GO_SUPEROXIDE_METABOLIC_PROCESS	8.16039e-22	0.498457	1.42294e-35	0.446631	4.40549e-26	0.54081	1.10401e-46	0.505841	1.12257e-32	0.596303	1.65013e-58	0.55822	3.87433e-13	0.388291	8.93163e-34	0.435855
GO_ORGANIC_HYDROXY_COMPOUND_METABOLIC_PROCESS	0.858541	-0.00992448	0.0394258	0.0779265	0.582373	-0.030615	0.668756	-0.0162109	0.299003	-0.0577842	0.635546	0.0179566	0.30193	-0.0574359	0.235233	0.0449537
GO_TELOMERE_MAINTENANCE_VIA_TELOMERE_LENGTHENING	0.0567092	-0.105811	0.000937158	-0.124881	0.108771	-0.0891259	0.00963671	-0.0978499	0.0154339	-0.134259	0.000170369	-0.141726	0.0137639	-0.136529	0.00387509	-0.109109
GO_PHOTOTRANSDUCTION	0.348085	0.0522137	0.0144979	-0.0924338	0.923863	-0.00532167	0.00079202	-0.126635	0.671677	0.0235985	0.00487405	-0.10637	0.0569254	0.10572	0.0630675	-0.0703419
GO_REGULATION_OF_LIGASE_ACTIVITY	6.2063e-05	0.220262	0.0778582	0.0667373	0.000956808	0.182377	1.96542e-23	0.364851	9.06415e-05	0.215406	2.55611e-17	0.312682	0.184304	0.0738269	5.59973e-05	0.151781
GO_REGULATION_OF_OXIDOREDUCTASE_ACTIVITY	1.10884e-07	0.289228	2.15164e-06	0.178115	1.23675e-07	0.288188	9.19919e-18	0.316826	1.99057e-11	0.360806	6.77329e-21	0.344389	1.70023e-05	0.236105	0.000135982	0.143817
GO_SULFATE_TRANSPORT	0.688212	0.0223424	0.000982052	-0.12439	0.382207	-0.0486305	0.000280192	-0.137008	0.74873	0.0178351	2.55301e-05	-0.158515	0.279317	0.060188	0.0419955	-0.0769402
GO_RESPONSE_TO_FOOD	8.67709e-06	0.243921	0.597884	0.0199836	4.17369e-06	0.252138	0.0759716	0.0671642	0.00020138	0.204797	0.0229503	0.0860149	0.528307	-0.0351035	0.464408	0.0277162
GO_REGULATION_OF_PROTEIN_INSERTION_INTO_MITOCHONDRIAL_MEMBRANE_INVOLVED_IN_APOPTOTIC_SIGNALING_PATHWAY	0.797819	-0.0142641	0.00358417	-0.110027	0.390239	-0.047816	0.387547	0.0327321	0.0393003	-0.114391	0.601595	0.0197814	9.0981e-05	-0.215357	0.00700962	-0.101904
GO_TELOMERE_ORGANIZATION	0.287701	0.0591508	0.00397294	0.108814	0.760688	0.016959	8.32102e-10	0.229491	0.707729	0.0208743	1.42777e-08	0.212389	0.248193	-0.0642353	0.0590414	0.071443
GO_IMMUNE_SYSTEM_DEVELOPMENT	4.00993e-24	0.522101	1.66258e-70	0.603264	6.06319e-42	0.65954	2.65032e-52	0.531879	3.83374e-29	0.567876	1.3181e-87	0.657073	4.18287e-07	0.276285	1.3705e-23	0.366066
GO_CAMP_BIOSYNTHETIC_PROCESS	0.538025	-0.0342806	0.343998	-0.0358448	0.685064	-0.0225807	0.000272342	-0.137281	0.0290834	-0.121076	0.00629466	-0.103243	1.65663e-06	-0.262125	0.0482843	-0.0747253
GO_ALPHA_AMINO_ACID_CATABOLIC_PROCESS	0.000299396	-0.199321	0.0434436	-0.0764065	7.0156e-05	-0.218702	0.00288694	-0.112539	0.000205757	-0.204504	0.000495561	-0.131408	0.776314	-0.0158205	0.807258	-0.00924393
GO_CELLULAR_COMPONENT_MAINTENANCE	0.838476	-0.0113506	0.344715	0.0357916	0.470145	0.0402015	0.0434211	-0.0764147	0.833721	0.0116896	0.967037	-0.00156587	0.734288	-0.0188992	0.322982	0.0374367
GO_REGULATION_OF_CARDIAC_MUSCLE_CELL_CONTRACTION	0.00741159	0.148285	0.407137	0.0314019	0.0156681	0.133958	0.743822	0.0123823	0.0148759	0.134992	0.0758362	0.0671952	0.0416881	-0.113045	0.00278279	-0.112961
GO_FC_GAMMA_RECEPTOR_SIGNALING_PATHWAY	1.18765e-13	0.396062	8.45306e-59	0.559397	3.8415e-22	0.501923	6.79544e-35	0.442606	5.04975e-16	0.429534	2.27777e-66	0.588513	0.152346	0.0795746	1.35619e-17	0.31526
GO_RRNA_METABOLIC_PROCESS	0.864038	-0.00953498	7.31263e-05	-0.149428	0.41147	-0.0457103	0.198483	0.0486949	0.904668	-0.00666909	0.448015	-0.0287433	0.97973	0.00141477	0.897357	0.004888
GO_RESPIRATORY_SYSTEM_PROCESS	0.0245335	0.124727	4.28621e-11	0.245999	0.0113582	0.140267	1.00217e-08	0.214596	0.326851	0.0545567	2.30431e-14	0.283258	0.765107	0.0166364	5.14322e-13	0.268587
GO_NEUROTRANSMITTER_TRANSPORT	1.10568e-14	-0.411077	2.84959e-25	-0.378805	3.44107e-17	-0.444729	2.08212e-32	-0.42739	1.96498e-18	-0.460128	5.55384e-38	-0.460488	1.84978e-08	-0.305722	3.48993e-19	-0.329676
GO_REGULATION_OF_T_HELPER_CELL_DIFFERENTIATION	3.03502e-27	0.551378	5.46965e-59	0.560161	3.3651e-40	0.64871	3.23634e-51	0.527017	1.70285e-40	0.650578	5.36599e-85	0.649524	8.87626e-10	0.331557	1.23191e-35	0.446999
GO_REGULATION_OF_VOLTAGE_GATED_CALCIUM_CHANNEL_ACTIVITY	9.19242e-12	-0.366406	2.93088e-24	-0.371208	1.53471e-14	-0.409048	1.33903e-27	-0.395555	3.97009e-14	-0.403086	1.33284e-30	-0.415829	1.37256e-07	-0.287192	1.43654e-15	-0.295671
GO_PH_REDUCTION	8.03391e-09	0.313065	7.96677e-05	0.148665	7.75598e-13	0.383632	5.52873e-23	0.361336	1.48216e-08	0.307692	2.78847e-19	0.330535	0.00587452	0.152496	8.69168e-05	0.147885
GO_POSITIVE_REGULATION_OF_TRIGLYCERIDE_LIPASE_ACTIVITY	0.29816	-0.057885	9.05539e-08	0.200459	0.321657	-0.0551447	1.6363e-14	0.284823	0.138685	-0.0823126	6.48117e-15	0.289008	0.658415	0.0246145	2.54007e-13	0.271998
GO_MONOSACCHARIDE_CATABOLIC_PROCESS	1.91147e-06	0.260605	0.00302179	0.112013	3.28099e-07	0.278702	3.00687e-12	0.259829	0.00114121	0.179676	1.94759e-12	0.262013	0.787213	0.0150302	3.39453e-08	0.206884
GO_POSITIVE_REGULATION_OF_MRNA_METABOLIC_PROCESS	0.273707	-0.0608938	0.0129324	-0.093975	0.452942	-0.0417741	2.3312e-09	-0.223452	0.516736	-0.0360932	3.47434e-07	-0.191297	0.605511	0.0287547	0.000889195	-0.125431
GO_RESPONSE_TO_FUNGICIDE	1.98035e-11	-0.360844	8.04361e-20	-0.335246	5.17812e-16	-0.429389	1.48971e-35	-0.446513	1.9343e-15	-0.421641	3.03878e-34	-0.438699	8.44597e-09	-0.31263	1.3409e-17	-0.315306
GO_NEGATIVE_REGULATION_BY_HOST_OF_VIRAL_TRANSCRIPTION	2.54984e-07	0.281187	2.95866e-08	0.207768	3.7126e-08	0.299428	6.67052e-10	0.230765	2.05919e-11	0.360558	2.35256e-15	0.293509	8.55631e-06	0.244081	5.71458e-10	0.231652
GO_REGULATION_OF_EPIDERMAL_GROWTH_FACTOR_ACTIVATED_RECEPTOR_ACTIVITY	0.00663651	0.150299	3.04751e-09	0.221853	2.93592e-05	0.229557	1.06168e-06	0.183334	0.02338	0.125745	1.94205e-11	0.250207	0.139092	-0.0822281	0.974718	0.00120083
GO_PROTEIN_NEDDYLATION	0.00471531	-0.156388	0.129822	-0.0573506	8.82177e-06	-0.243732	1.85607e-11	0.250446	0.0567512	-0.105794	1.41978e-05	0.163371	0.227043	-0.0671916	0.0450901	0.0758177
GO_POTASSIUM_ION_HOMEOSTASIS	0.0327349	-0.118485	0.00799326	-0.100248	0.0105951	-0.1416	4.7775e-07	-0.189061	0.000371719	-0.196272	1.4569e-06	-0.181015	0.0521834	-0.107803	8.76315e-05	-0.147812
GO_HORMONE_TRANSPORT	0.880295	-0.00838568	2.69406e-06	-0.176422	0.114993	-0.0875981	0.00662892	-0.102601	0.00274651	-0.16561	0.00122774	-0.12202	4.706e-08	-0.297251	6.50135e-09	-0.217263
GO_PROTEIN_CATABOLIC_PROCESS	0.0301429	0.120297	0.000241517	0.138432	0.00131334	0.177495	1.58828e-05	0.162454	0.176855	0.0750959	5.0128e-08	0.204356	0.0614769	-0.103851	0.0409423	-0.0773381
GO_POSITIVE_REGULATION_OF_INTRACELLULAR_STEROID_HORMONE_RECEPTOR_SIGNALING_PATHWAY	0.00624438	-0.1514	0.0431316	-0.0765202	0.00195455	-0.171183	2.20838e-12	-0.261383	0.0675358	-0.101533	2.52819e-08	-0.208774	0.0162754	-0.133196	0.000618422	-0.129173
GO_NEGATIVE_REGULATION_OF_MYOTUBE_DIFFERENTIATION	4.80701e-10	0.336492	4.13137e-05	0.154422	4.91246e-11	0.354117	1.98887e-08	0.2103	5.14303e-11	0.353773	1.01435e-14	0.286992	2.51239e-06	0.257675	5.44507e-08	0.203816
GO_INORGANIC_ANION_TRANSPORT	0.484718	-0.038894	0.343645	-0.035871	0.743508	-0.0182191	0.00899049	-0.0987458	0.372332	-0.0496463	0.0470196	-0.0751503	0.163248	-0.0775203	0.0136561	-0.0932432
GO_CARBOHYDRATE_PHOSPHORYLATION	1.63187e-08	0.306838	0.000269515	0.137382	5.20507e-11	0.353683	0.000287093	0.136773	2.12139e-06	0.259492	2.05021e-05	0.160347	0.19505	0.0720613	0.143681	0.0553629
GO_PROTEIN_IMPORT	0.21857	-0.0684306	0.0735858	0.0677165	0.240961	-0.0652255	0.0779735	0.0667115	0.0256011	-0.123821	0.00377361	0.109422	0.000859336	-0.184006	0.0889485	-0.0643851
GO_NUCLEOSIDE_BISPHOSPHATE_METABOLIC_PROCESS	0.540208	0.0340968	0.0584776	-0.0716021	0.199465	0.0713566	0.727155	-0.0132202	0.401728	-0.0466682	0.276841	-0.0411872	0.0310257	-0.119665	0.964615	0.00168099
GO_REGULATION_OF_INTRACELLULAR_STEROID_HORMONE_RECEPTOR_SIGNALING_PATHWAY	0.933012	-0.00468062	0.0410154	0.0773102	0.438648	0.0431064	0.0845455	-0.0652889	0.965411	0.00241473	0.728746	-0.0131399	0.0131884	-0.137367	0.00161015	-0.119086
GO_MAMMARY_GLAND_EPITHELIAL_CELL_DIFFERENTIATION	0.00497737	0.155438	2.56164e-15	0.293134	0.117907	0.0869046	1.03731e-12	0.265146	0.00271645	0.165793	1.08867e-22	0.359009	0.130393	0.0840767	2.59565e-14	0.282711
GO_CELLULAR_RESPONSE_TO_GAMMA_RADIATION	2.11962e-05	0.233485	8.23819e-16	0.298086	4.97214e-07	0.27455	6.68091e-22	0.352681	8.59482e-06	0.244029	1.92708e-30	0.414782	0.625381	0.0271823	3.07948e-06	0.175407
GO_REGULATION_OF_HEAT_GENERATION	2.27726e-13	0.391809	1.25798e-23	0.366354	6.95821e-18	0.453423	9.2246e-33	0.429602	9.77003e-17	0.438916	6.85324e-48	0.511627	0.00929393	0.144082	8.91997e-10	0.229089
GO_REGULATION_OF_FIBROBLAST_MIGRATION	1.26631e-06	0.264953	2.09044e-24	0.372322	3.19357e-10	0.339734	5.22151e-09	0.218602	3.86005e-05	0.226204	2.44703e-22	0.356202	0.587583	-0.0301932	0.000323286	0.135623
GO_INDUCTION_OF_POSITIVE_CHEMOTAXIS	9.55974e-07	0.267878	7.40705e-07	0.185938	6.46475e-08	0.294308	1.12576e-31	0.422753	6.05414e-09	0.315512	1.399e-27	0.395422	1.73489e-05	0.235867	5.63373e-18	0.318792
GO_REGENERATION	2.25272e-20	0.482709	3.97943e-48	0.512746	1.5888e-29	0.571091	9.13746e-51	0.524977	1.5158e-25	0.5358	2.94281e-76	0.622569	9.31175e-06	0.243113	1.93702e-24	0.372572
GO_EXTRINSIC_APOPTOTIC_SIGNALING_PATHWAY	5.89143e-22	0.499961	8.25627e-47	0.506451	2.10528e-32	0.594203	3.67027e-42	0.483123	4.96887e-28	0.558319	3.91185e-72	0.608865	5.87439e-08	0.295199	5.16138e-20	0.336908
GO_REGULATION_OF_TRANSLATIONAL_ELONGATION	5.68468e-06	-0.248704	4.05872e-10	-0.233602	5.74782e-08	-0.295401	0.263127	-0.0423825	1.24054e-07	-0.288159	0.000647377	-0.128707	0.0010443	-0.181041	1.01278e-06	-0.183677
GO_CELL_MATRIX_ADHESION	4.6764e-19	0.467566	2.68475e-38	0.462258	1.66053e-26	0.544708	1.69408e-26	0.387746	5.24084e-23	0.510898	1.09172e-44	0.496027	0.000607107	0.189183	2.54993e-16	0.303107
GO_PITUITARY_GLAND_DEVELOPMENT	9.71911e-05	-0.214499	6.23364e-07	-0.187173	7.60971e-06	-0.245416	4.41035e-11	-0.245846	5.92911e-07	-0.272771	1.09284e-11	-0.253216	0.00285153	-0.164984	0.000188748	-0.140767
GO_MATING	0.00603918	-0.152001	1.8412e-09	-0.22485	0.000163115	-0.207649	9.50421e-14	-0.276673	7.34954e-05	-0.218108	2.09826e-15	-0.294012	1.3664e-05	-0.238674	2.42635e-12	-0.26091
GO_DEVELOPMENTAL_INDUCTION	0.453196	-0.0417507	0.0240468	0.0853411	0.214597	-0.0690234	0.00148997	-0.119932	0.748045	-0.0178855	0.605297	-0.0195803	0.417302	-0.0451434	0.547517	-0.0227881
GO_REGULATION_OF_TRANSFERASE_ACTIVITY	2.8657e-08	0.301784	5.33312e-16	0.29996	4.65576e-10	0.336746	1.8341e-29	0.408303	2.9913e-07	0.279616	9.32696e-40	0.470307	0.627723	-0.0269985	0.000177786	0.141328
GO_NEGATIVE_REGULATION_OF_ALCOHOL_BIOSYNTHETIC_PROCESS	6.82861e-10	0.333678	1.70404e-22	0.357459	2.62501e-14	0.405696	1.48332e-30	0.415526	2.08746e-12	0.376856	1.03275e-39	0.470066	0.0192832	0.129751	6.02212e-09	0.217732
GO_CHROMOSOME_SEPARATION	0.000477361	-0.192689	0.116792	-0.0593756	7.83262e-05	-0.217291	0.0248952	-0.0848378	3.964e-05	-0.225875	0.00505227	-0.105936	0.0164316	-0.133004	0.196997	-0.0488565
GO_GANGLIOSIDE_METABOLIC_PROCESS	0.000222115	0.203457	0.00532274	0.105303	4.10017e-07	0.276484	7.73118e-05	0.148932	0.00743632	0.148224	4.94959e-05	0.152858	0.406397	-0.0462074	0.371982	0.0338184
GO_TISSUE_HOMEOSTASIS	2.73794e-15	0.419565	2.53307e-29	0.407362	4.15684e-22	0.501562	2.5393e-27	0.393606	1.92699e-18	0.460231	3.70231e-39	0.46703	3.36388e-09	0.320523	5.76993e-09	0.217993
GO_ANTIGEN_PROCESSING_AND_PRESENTATION_VIA_MHC_CLASS_IB	3.77786e-17	0.444214	2.05256e-33	0.433641	4.93173e-24	0.521215	3.24167e-37	0.456149	5.08009e-25	0.530814	6.44501e-45	0.497169	1.62093e-07	0.285593	4.82917e-10	0.232614
GO_GAMMA_AMINOBUTYRIC_ACID_SIGNALING_PATHWAY	1.54761e-09	-0.327007	1.16131e-17	-0.315887	1.16054e-10	-0.347602	2.06476e-28	-0.401178	7.04202e-12	-0.368312	6.52141e-28	-0.397732	4.37108e-09	-0.318301	1.31112e-18	-0.324552
GO_POSITIVE_REGULATION_OF_STEROL_TRANSPORT	0.0113338	0.140308	1.37121e-12	0.263763	0.000937953	0.18268	0.00656176	0.102727	0.0109185	0.141025	1.1678e-05	0.164958	0.226573	0.0672594	4.19319e-05	0.154294
GO_ADAPTIVE_IMMUNE_RESPONSE_BASED_ON_SOMATIC_RECOMBINATION_OF_IMMUNE_RECEPTORS_BUILT_FROM_IMMUNOGLOBULIN_SUPERFAMILY_DOMAINS	1.08574e-31	0.588651	3.01338e-79	0.632095	1.34857e-50	0.707358	8.92166e-88	0.657556	4.68229e-49	0.699495	3.45921e-127	0.749897	1.70291e-14	0.408401	6.3651e-41	0.476588
GO_CELL_CYCLE_ARREST	0.00595357	-0.152257	0.368543	-0.0340622	0.123126	-0.0856955	8.68401e-13	-0.266022	0.00527042	-0.154428	3.46071e-07	-0.191325	0.000251403	-0.201751	4.33908e-08	-0.205296
GO_THYROID_HORMONE_METABOLIC_PROCESS	0.327604	0.054472	0.0375738	0.0786718	0.389572	0.0478831	0.880909	0.00567669	0.550494	0.0332356	0.147305	0.0548675	0.0235471	-0.125595	0.113543	-0.0599079
GO_APOPTOTIC_CELL_CLEARANCE	1.24847e-17	0.450272	2.80762e-27	0.393298	2.17023e-24	0.524717	2.85659e-38	0.462107	2.15286e-21	0.493937	1.01274e-42	0.486027	0.00520781	0.15464	2.09572e-08	0.209968
GO_MODIFICATION_OF_MORPHOLOGY_OR_PHYSIOLOGY_OF_OTHER_ORGANISM	1.80814e-17	0.448259	1.8704e-32	0.427683	4.56667e-24	0.521544	6.09838e-33	0.43072	3.74558e-17	0.444261	1.69015e-49	0.519166	0.0358679	0.116452	1.05024e-12	0.265085
GO_RIBOSOME_ASSEMBLY	0.868643	0.00920903	0.00684459	-0.102201	0.607148	-0.0286243	0.0020207	0.116578	0.803024	0.013889	0.20364	0.0481414	0.731998	0.0190685	0.145807	0.0550712
GO_NEGATIVE_REGULATION_OF_ACTIN_FILAMENT_DEPOLYMERIZATION	2.02867e-05	0.234008	3.23278e-20	0.33865	2.75812e-09	0.322196	3.63693e-06	0.174137	7.48409e-08	0.292939	5.24514e-15	0.289954	0.0170828	0.13222	9.83073e-06	0.166344
GO_DNA_LIGATION_INVOLVED_IN_DNA_REPAIR	7.76542e-05	-0.217402	1.17001e-05	-0.164943	1.90877e-06	-0.26062	0.0729483	-0.0678666	0.000119612	-0.211779	0.000114992	-0.145353	0.950781	0.00343715	0.613714	-0.019125
GO_REGULATION_OF_CELL_JUNCTION_ASSEMBLY	5.39001e-08	0.295997	2.00308e-22	0.356898	2.77495e-10	0.340839	3.32672e-07	0.1916	6.3848e-09	0.315054	2.14961e-19	0.331528	0.867241	-0.00930823	0.0080466	0.100163
GO_HYPEROSMOTIC_RESPONSE	3.96511e-06	0.252703	2.30487e-31	0.420762	3.16208e-11	0.357399	3.69264e-22	0.354765	2.17425e-06	0.259229	2.55217e-33	0.433059	0.0950761	0.0927487	5.91996e-14	0.278893
GO_REGULATION_OF_SMAD_PROTEIN_IMPORT_INTO_NUCLEUS	1.26792e-09	0.328647	2.6435e-13	0.271807	1.96765e-16	0.434953	1.80993e-17	0.314089	4.1136e-13	0.387892	3.99144e-26	0.38506	0.00741183	0.148284	8.54863e-09	0.21558
GO_NEGATIVE_REGULATION_OF_NATURAL_KILLER_CELL_MEDIATED_IMMUNITY	1.14296e-28	0.563839	3.5694e-72	0.609001	7.44817e-44	0.670909	9.10945e-71	0.60417	2.06107e-44	0.674137	1.14127e-102	0.696771	2.24024e-17	0.447088	1.52446e-42	0.485108
GO_ARTERY_DEVELOPMENT	0.00752662	0.148002	0.00273598	0.113155	0.000333247	0.197817	0.508847	0.0250283	0.0198708	0.129134	0.0146434	0.0922982	0.155633	-0.0789437	0.333599	-0.0366245
GO_PROTEIN_DEALKYLATION	9.25627e-08	-0.29094	3.14472e-06	-0.175248	9.17157e-07	-0.268307	8.07097e-20	-0.335234	1.63043e-08	-0.306846	1.87437e-17	-0.313947	0.0001185	-0.211903	2.96532e-13	-0.271254
GO_NEGATIVE_REGULATION_OF_DENDRITE_MORPHOGENESIS	2.58809e-07	-0.281041	2.78491e-18	-0.321591	3.12184e-08	-0.301008	3.85394e-30	-0.412804	1.24826e-11	-0.364201	3.86136e-28	-0.399307	2.10958e-09	-0.324438	3.18266e-19	-0.330029
GO_NEGATIVE_REGULATION_OF_TYPE_I_INTERFERON_PRODUCTION	7.2907e-24	0.519532	1.31619e-64	0.581993	5.90897e-34	0.605935	4.90033e-50	0.521645	2.17467e-36	0.623408	9.36652e-77	0.624176	4.53652e-14	0.40224	4.43264e-31	0.418933
GO_EXTRACELLULAR_MATRIX_ASSEMBLY	8.8458e-16	0.426265	2.07485e-30	0.414572	7.38986e-18	0.4531	1.58839e-35	0.446349	3.87922e-17	0.444067	5.22568e-49	0.516888	5.28218e-08	0.296184	3.88353e-23	0.362541
GO_POSTREPLICATION_REPAIR	0.0266584	0.122955	8.36799e-06	0.16763	0.12916	0.0843465	6.04835e-19	0.327559	0.0444438	0.11157	6.36598e-18	0.318303	0.16196	0.0777575	0.000125481	0.144555
GO_SKELETAL_SYSTEM_DEVELOPMENT	0.000303087	0.19915	1.56655e-09	0.225802	5.83993e-05	0.221032	0.00528544	0.105388	4.14362e-06	0.252218	2.28074e-09	0.223582	0.283843	0.0596255	0.120424	0.0587941
GO_ORGANOPHOSPHATE_METABOLIC_PROCESS	0.54811	0.0334345	0.128822	-0.0575003	0.367527	-0.0501466	1.74177e-05	0.161696	0.118651	-0.0867298	0.0140268	0.0928815	0.0302486	-0.120221	0.0406489	0.0774505
GO_CARDIAC_MYOFIBRIL_ASSEMBLY	0.000984329	-0.181945	1.27746e-06	-0.181982	1.98166e-06	-0.26022	1.50735e-31	-0.421944	0.00160002	-0.174387	1.85802e-24	-0.372709	0.00274682	-0.165608	1.9391e-10	-0.237752
GO_REGULATION_OF_HEART_CONTRACTION	0.00271962	-0.165773	3.25417e-07	-0.191754	0.000572347	-0.190049	9.03883e-14	-0.276909	0.00334791	-0.162286	5.45799e-13	-0.268298	0.00865028	-0.145426	1.17903e-06	-0.182569
GO_CELLULAR_AMINO_ACID_BIOSYNTHETIC_PROCESS	0.000126198	-0.211071	0.000434326	-0.132723	5.63431e-06	-0.248803	0.050655	-0.073953	1.90574e-08	-0.305455	0.00542101	-0.10508	0.00961589	-0.14344	0.596308	-0.0200696
GO_CRANIAL_NERVE_MORPHOGENESIS	0.000101436	0.213942	8.52553e-05	0.148058	0.000232605	0.202823	2.08274e-09	0.224121	1.29433e-05	0.239306	3.50269e-11	0.24708	0.0450074	0.111278	0.00738719	0.101245
GO_ACTIVATION_OF_JUN_KINASE_ACTIVITY	8.05172e-06	0.244774	2.19186e-19	0.331454	6.02619e-10	0.334683	0.000662494	0.128472	4.22651e-08	0.29824	1.19668e-10	0.240423	0.00212149	0.169856	3.53464e-08	0.206623
GO_REGULATION_OF_BROWN_FAT_CELL_DIFFERENTIATION	0.570159	0.0316108	0.0109372	0.0961983	0.775085	0.0159097	0.273224	0.0414984	0.0928798	-0.0933678	0.00569202	0.104483	5.616e-05	-0.221526	0.295643	-0.039612
GO_FIBRIL_ORGANIZATION	2.82744e-24	0.523593	5.93572e-26	0.383808	5.88948e-30	0.574672	3.59295e-44	0.493429	5.67988e-34	0.606063	1.3181e-52	0.533222	2.07597e-10	0.343109	1.61263e-16	0.305043
GO_LONG_CHAIN_FATTY_ACID_METABOLIC_PROCESS	0.0796969	0.0973524	0.312615	0.0382467	0.0711068	0.100246	0.0807445	-0.0661003	0.725615	0.0195414	0.165307	-0.0525357	0.739638	-0.0185042	0.486774	0.0263469
GO_MONOVALENT_INORGANIC_CATION_TRANSPORT	0.0515581	-0.108089	1.55412e-09	-0.225849	0.0326186	-0.118564	0.000310888	-0.136003	0.000736047	-0.18633	1.70288e-07	-0.19621	0.0304439	-0.12008	3.26399e-05	-0.156439
GO_RELAXATION_OF_CARDIAC_MUSCLE	0.00818461	0.146455	0.000191131	0.140649	0.0119058	0.139358	0.157169	0.0535646	0.0930189	0.0933282	0.000588514	0.129677	0.0421178	-0.112809	0.25742	-0.0428925
GO_POSITIVE_REGULATION_OF_BEHAVIOR	0.312206	-0.0562305	0.444905	-0.0289405	0.788146	-0.0149626	0.00340508	-0.110627	0.749182	-0.017802	0.430808	-0.0298445	0.949312	0.00353991	0.525631	-0.0240457
GO_CALCIUM_MEDIATED_SIGNALING_USING_INTRACELLULAR_CALCIUM_SOURCE	0.36774	0.0501244	0.237442	-0.0447425	0.602306	-0.0290104	0.114031	0.0598272	0.896314	-0.00725664	0.144734	0.055218	0.151132	-0.0798101	0.449427	0.028654
GO_NEURAL_TUBE_DEVELOPMENT	0.1514	-0.079758	0.0027415	0.113132	0.13414	-0.083269	0.0145624	-0.0923735	0.0924276	-0.0934967	0.668253	0.0162371	0.56643	-0.0319168	0.660406	0.0166465
GO_POLYSACCHARIDE_METABOLIC_PROCESS	1.8745e-08	0.305603	1.37992e-10	0.239638	5.30414e-09	0.316648	4.65238e-10	0.232826	1.2065e-07	0.288425	1.0133e-15	0.29719	0.507233	0.0369147	3.62012e-06	0.174172
GO_REGULATION_OF_INTRACELLULAR_SIGNAL_TRANSDUCTION	1.37352e-11	0.363509	1.14273e-41	0.480539	1.59057e-18	0.461235	1.74357e-20	0.340931	1.95514e-12	0.377309	3.68817e-44	0.493372	0.330803	0.0541134	7.44564e-09	0.216431
GO_CYCLIC_NUCLEOTIDE_METABOLIC_PROCESS	0.00136261	-0.176919	4.25514e-06	-0.172929	0.00196906	-0.171064	2.41577e-13	-0.272239	6.07945e-06	-0.247951	1.0835e-12	-0.264931	1.15567e-09	-0.329406	8.17121e-13	-0.266322
GO_POSITIVE_REGULATION_OF_T_CELL_PROLIFERATION	1.69301e-31	0.587129	4.48853e-78	0.628397	6.46383e-50	0.703916	1.4182e-82	0.642319	1.06897e-48	0.697628	6.1488e-119	0.733388	9.05199e-18	0.452009	8.88763e-44	0.491439
GO_MULTICELLULAR_ORGANISMAL_MOVEMENT	2.50967e-06	-0.257686	0.490965	-0.0260941	1.94733e-06	-0.260407	2.14502e-14	-0.283586	3.97802e-08	-0.298796	6.31077e-12	-0.256053	0.0072184	-0.148769	0.0860354	-0.0649789
GO_CLATHRIN_COAT_ASSEMBLY	6.79319e-05	-0.219113	1.45818e-07	-0.197263	0.00112003	-0.179964	5.58431e-16	-0.299762	1.26688e-06	-0.264948	6.72837e-15	-0.28884	5.19236e-08	-0.296343	1.41354e-12	-0.263612
GO_NEGATIVE_REGULATION_OF_MEIOTIC_NUCLEAR_DIVISION	0.0629457	0.103273	0.00479678	0.106563	0.1015	0.0910012	1.3567e-07	0.19775	0.375097	0.0493602	2.45229e-08	0.208968	0.0121255	-0.139004	0.559952	0.0220846
GO_VASCULAR_SMOOTH_MUSCLE_CELL_DIFFERENTIATION	0.387744	-0.0480679	2.21504e-05	-0.159703	0.0246779	-0.124602	0.114372	-0.0597709	0.859955	-0.0098243	0.114503	-0.0597493	0.670458	0.0236915	0.0239131	-0.0854219
GO_POSITIVE_REGULATION_OF_BIOSYNTHETIC_PROCESS	0.00403856	0.15908	1.12267e-08	0.213891	7.60776e-05	0.217665	0.211249	0.0473428	0.0252106	0.124148	6.29131e-05	0.150759	0.182972	-0.0740511	0.777231	0.0107203
GO_NEGATIVE_REGULATION_OF_NITROGEN_COMPOUND_METABOLIC_PROCESS	0.156302	-0.0788166	0.510707	0.0249187	0.422825	-0.0446106	0.00392353	-0.108962	0.262814	-0.062293	0.237993	-0.04469	0.0281016	-0.12182	0.0644024	-0.0699896
GO_DNA_INTEGRATION	2.05579e-09	-0.324653	2.6899e-09	-0.222599	4.97701e-11	-0.354019	0.000119754	-0.144983	1.62341e-11	-0.362295	4.18152e-09	-0.219949	0.000182972	-0.206099	0.000626903	-0.129035
GO_CELL_ACTIVATION	1.0157e-32	0.596636	3.64476e-79	0.631836	2.00419e-52	0.716359	4.47812e-74	0.615401	2.58276e-44	0.673573	2.02601e-119	0.734388	1.17345e-09	0.329281	1.11929e-34	0.44131
GO_REGULATION_OF_MYELINATION	0.058991	-0.104857	0.60744	-0.0194641	0.400488	-0.0467912	0.000657743	-0.128545	0.0346751	-0.117207	0.0545936	-0.0727342	0.00120579	-0.178824	0.000635787	-0.128891
GO_NEGATIVE_REGULATION_OF_JUN_KINASE_ACTIVITY	0.00666721	-0.150216	0.0163073	0.0908253	0.510581	-0.0366245	0.151871	0.0542565	0.00181954	-0.172335	0.169155	0.0520623	0.0057719	-0.152812	0.318605	-0.0377766
GO_REGULATION_OF_AXON_GUIDANCE	0.0065495	-0.150538	8.50098e-05	-0.148084	0.00443792	-0.157446	2.20865e-14	-0.283452	0.000120411	-0.211692	3.05415e-11	-0.24781	1.19437e-06	-0.265565	5.13298e-07	-0.188553
GO_REGULATION_OF_DOPAMINE_SECRETION	2.26797e-12	-0.376281	1.47964e-20	-0.341534	1.82761e-13	-0.393253	6.87677e-24	-0.368376	3.78385e-13	-0.388449	1.18233e-27	-0.395933	5.8195e-06	-0.248441	1.67592e-17	-0.314402
GO_RESPONSE_TO_COPPER_ION	3.75223e-15	0.41767	5.06809e-30	0.412019	1.48872e-17	0.449317	6.11788e-43	0.487156	5.53318e-23	0.510657	8.95835e-56	0.546899	9.45076e-10	0.331047	6.97521e-24	0.368329
GO_REGULATION_OF_CIRCADIAN_SLEEP_WAKE_CYCLE	0.0346716	-0.11721	8.72927e-08	-0.200703	0.0165582	-0.132849	6.93131e-12	-0.255571	0.00444718	-0.15741	1.88085e-12	-0.262188	0.21388	-0.0691313	9.08635e-07	-0.184465
GO_NEGATIVE_REGULATION_OF_CELLULAR_PROTEIN_CATABOLIC_PROCESS	0.00969912	-0.143277	0.000412801	-0.133226	0.0432845	-0.112181	0.000896255	-0.125349	0.000578929	-0.189881	6.52287e-05	-0.15044	4.5474e-05	-0.224171	1.64034e-08	-0.211517
GO_REGULATION_OF_DOUBLE_STRAND_BREAK_REPAIR_VIA_HOMOLOGOUS_RECOMBINATION	0.511942	0.0365067	0.0157353	0.0913161	0.689667	0.0222325	1.63054e-06	0.180182	0.792347	-0.014659	1.12467e-06	0.182914	0.137422	-0.0825759	0.0316219	0.0812995
GO_RESPONSE_TO_AXON_INJURY	1.49699e-13	0.394557	2.9504e-28	0.400113	4.80243e-23	0.511286	2.59109e-31	0.420436	4.0454e-20	0.479844	1.32336e-49	0.519658	1.47556e-05	0.237774	3.98899e-19	0.329163
GO_REGULATION_OF_VACUOLE_ORGANIZATION	6.43845e-07	-0.271934	0.00285336	-0.112674	0.000549198	-0.190652	3.73758e-11	-0.246733	2.62878e-08	-0.302565	4.71656e-09	-0.21922	8.32979e-06	-0.244387	1.23612e-08	-0.213291
GO_CIRCADIAN_REGULATION_OF_GENE_EXPRESSION	0.594494	-0.0296363	0.245933	-0.0439434	0.869269	0.00916475	3.22015e-10	-0.234911	0.117285	-0.0870515	7.96932e-06	-0.168018	5.87251e-05	-0.220962	4.01219e-09	-0.220199
GO_RETINOL_METABOLIC_PROCESS	4.00385e-07	0.276722	3.75233e-11	0.246712	5.30832e-08	0.296138	5.34147e-11	0.244815	1.26518e-09	0.328665	2.21093e-16	0.303712	3.58712e-05	0.227107	2.35644e-11	0.249186
GO_OXALOACETATE_METABOLIC_PROCESS	0.60153	0.0290724	0.0221898	-0.0864988	0.202643	0.0708561	0.272386	-0.041571	0.883661	-0.00814817	0.138431	-0.0560978	0.0168253	-0.132527	0.0248292	-0.0848764
GO_NEGATIVE_REGULATION_OF_TUMOR_NECROSIS_FACTOR_MEDIATED_SIGNALING_PATHWAY	9.3524e-08	0.290842	0.00830486	0.0997613	1.14616e-08	0.309961	8.17966e-19	0.326389	2.83897e-05	0.229965	4.10127e-13	0.269687	0.190789	0.0727526	6.9562e-06	0.169094
GO_NEGATIVE_REGULATION_OF_EXOCYTOSIS	0.000531125	0.19114	2.00814e-35	0.445748	2.12231e-05	0.23347	1.42485e-13	0.274758	0.000382306	0.195873	6.21661e-29	0.404732	0.866299	-0.00937495	0.000861447	0.125762
GO_INTRACELLULAR_STEROID_HORMONE_RECEPTOR_SIGNALING_PATHWAY	0.111084	0.08855	0.00269672	0.113321	0.0307537	0.119858	0.712475	-0.0139636	0.445677	0.0424482	0.166752	0.052357	0.0216764	-0.12733	0.000113868	-0.145443
GO_REGULATION_OF_WNT_SIGNALING_PATHWAY	0.182348	0.0741565	0.723862	0.0133865	0.307366	0.0567949	0.259924	0.0426678	0.591421	0.0298836	0.0245613	0.0850341	0.112104	-0.0882993	0.719248	-0.0136199
GO_NEGATIVE_REGULATION_OF_CELL_JUNCTION_ASSEMBLY	0.00910024	0.144477	1.59727e-10	0.238829	0.00180716	0.172445	0.000279281	0.137039	0.17002	0.0762957	3.22948e-09	0.221505	0.00127578	-0.177947	0.645405	0.0174345
GO_ANTIGEN_PROCESSING_AND_PRESENTATION_OF_PEPTIDE_ANTIGEN	4.2332e-22	0.501478	3.56077e-32	0.425924	1.03764e-32	0.596565	2.401e-66	0.58843	9.5002e-28	0.555852	4.53971e-72	0.608645	5.19009e-07	0.274118	1.40781e-20	0.341717
GO_HIPPO_SIGNALING	0.982769	0.00120262	5.02957e-07	0.188697	0.124182	0.0854558	0.215817	-0.0468733	0.917549	0.00576453	0.0175209	0.0898321	0.0654705	-0.102303	0.0572719	-0.0719467
GO_NEGATIVE_REGULATION_OF_EPITHELIAL_TO_MESENCHYMAL_TRANSITION	0.00354135	-0.161331	1.77598e-08	-0.211016	0.00435928	-0.157757	1.03852e-06	-0.183495	0.00038761	-0.195676	5.40706e-07	-0.188185	0.816711	-0.0129059	0.090832	-0.0640094
GO_REGULATION_OF_MEMBRANE_DEPOLARIZATION	0.159912	-0.0781376	0.519763	-0.0243874	0.535615	-0.034484	0.414229	-0.0309298	0.17522	-0.0753798	0.192509	-0.0493495	0.00444189	-0.157431	0.167	-0.0523264
GO_AMINO_SUGAR_BIOSYNTHETIC_PROCESS	1.53794e-13	0.394381	4.90159e-11	0.245278	7.60407e-21	0.487954	1.91668e-29	0.408174	2.50641e-17	0.446473	2.18866e-29	0.407788	3.25877e-06	0.254853	5.90685e-09	0.21785
GO_REGULATION_OF_NERVOUS_SYSTEM_DEVELOPMENT	9.02494e-12	-0.366538	1.57234e-12	-0.263082	2.16874e-10	-0.342768	5.66169e-34	-0.437061	5.92301e-13	-0.385451	2.12278e-30	-0.414507	5.88593e-10	-0.334872	8.29435e-21	-0.343652
GO_REGULATION_OF_ESTABLISHMENT_OF_PROTEIN_LOCALIZATION_TO_CHROMOSOME	0.0206729	-0.128316	1.59923e-05	-0.162398	0.00150867	-0.175317	0.0019597	0.116919	0.000139357	-0.209755	0.614396	0.0190882	2.28576e-05	-0.232581	0.122631	-0.0584475
GO_REGULATION_OF_CARDIAC_MUSCLE_CELL_DIFFERENTIATION	0.0132917	0.137214	0.19535	-0.0490365	0.0244321	0.124815	0.0347622	-0.0798652	0.106227	0.0897704	0.242449	-0.0442689	0.0070474	-0.149207	0.781511	0.0105089
GO_POSITIVE_REGULATION_OF_DIGESTIVE_SYSTEM_PROCESS	0.856109	-0.010097	0.0686084	-0.0689176	0.849483	-0.0105674	0.309036	-0.0385305	0.81401	-0.0130995	0.231082	-0.0453544	0.780434	0.0155213	0.856596	0.00684723
GO_INTRINSIC_APOPTOTIC_SIGNALING_PATHWAY_IN_RESPONSE_TO_DNA_DAMAGE	1.09235e-16	0.438288	1.0698e-40	0.475384	3.70671e-26	0.541504	2.35043e-36	0.4512	8.93636e-24	0.518653	1.06054e-54	0.542335	0.000188475	0.205697	3.06674e-13	0.271092
GO_TETRAPYRROLE_BIOSYNTHETIC_PROCESS	0.649565	0.0252971	0.00444741	-0.107471	0.653008	0.0250312	0.0249001	0.084835	0.346029	-0.0524365	0.816031	-0.00881536	0.371607	0.0497215	0.151196	0.0543459
GO_NUCLEOSIDE_PHOSPHATE_BIOSYNTHETIC_PROCESS	3.61774e-07	0.277732	0.0811524	0.0660118	1.31939e-05	0.239083	5.54409e-27	0.391209	0.000317035	0.198519	2.91553e-19	0.330365	0.659275	0.0245484	2.81112e-08	0.208096
GO_PROTEIN_LIPID_COMPLEX_ASSEMBLY	3.66023e-16	0.431396	1.5169e-26	0.38809	7.59231e-24	0.519357	4.97909e-29	0.405384	9.06576e-20	0.475851	3.21524e-38	0.46182	6.79157e-08	0.293847	1.19734e-23	0.36652
GO_POSITIVE_REGULATION_OF_SODIUM_ION_TRANSPORT	0.00666112	-0.150232	0.0320556	0.0810944	0.0110873	-0.140731	0.0029786	-0.112179	0.0735528	-0.0993943	0.261724	-0.0425071	0.500909	-0.0374659	0.718328	-0.0136665
GO_DETECTION_OF_OTHER_ORGANISM	4.10357e-31	0.584071	5.79108e-80	0.634329	1.60364e-47	0.6914	3.83171e-75	0.618931	1.68143e-46	0.685864	2.14231e-110	0.714885	1.18678e-14	0.41064	1.08575e-44	0.496039
GO_ESTABLISHMENT_OF_LOCALIZATION_IN_CELL	0.155073	-0.0790506	0.0047095	-0.106784	0.396507	-0.0471873	0.0635901	-0.0702032	0.0447986	-0.111385	0.0240678	-0.0853285	0.000177876	-0.206481	2.0933e-08	-0.209975
GO_G_PROTEIN_COUPLED_GLUTAMATE_RECEPTOR_SIGNALING_PATHWAY	9.33526e-05	-0.215023	9.97425e-21	-0.342979	3.21592e-06	-0.254997	5.43869e-21	-0.345185	4.78387e-07	-0.274938	1.32438e-24	-0.37382	0.000551681	-0.190586	9.01369e-17	-0.30748
GO_NEURAL_RETINA_DEVELOPMENT	2.33388e-18	-0.459225	2.14785e-22	-0.356655	7.93517e-24	-0.519167	4.24736e-39	-0.466702	2.75384e-21	-0.492779	1.72445e-39	-0.468851	3.08529e-10	-0.340006	4.30674e-22	-0.354226
GO_CLEAVAGE_INVOLVED_IN_RRNA_PROCESSING	0.116438	0.0872525	0.00120521	-0.122218	0.699433	0.0214965	0.035553	0.0795215	0.0638603	0.102918	0.796117	0.00978993	0.0447225	0.111425	0.182911	0.0504333
GO_REGULATION_OF_EXIT_FROM_MITOSIS	0.174979	0.0754218	0.300028	0.0392544	0.440614	0.0429217	0.000217342	0.139435	0.152031	0.0796355	0.00191785	0.117159	0.422379	0.0446535	0.0598242	0.0712241
GO_FORELIMB_MORPHOGENESIS	0.182323	0.0741608	0.000628897	0.129002	0.56116	0.0323509	0.646989	0.017351	0.404256	0.0464183	0.0943788	0.0633186	0.70926	0.0207598	0.0537393	-0.0729922
GO_ASPARTATE_FAMILY_AMINO_ACID_BIOSYNTHETIC_PROCESS	0.00313065	-0.163419	3.39272e-07	-0.191463	0.000281234	-0.200195	0.460677	0.0279482	7.77721e-06	-0.245168	0.0941468	-0.0633631	4.27445e-05	-0.224941	0.0176168	-0.0897563
GO_MANGANESE_ION_TRANSPORT	0.824898	0.0123197	1.47278e-05	-0.163072	0.779082	-0.0156194	1.32491e-07	-0.19791	0.236033	-0.0659122	2.74335e-07	-0.192939	0.00196621	-0.171087	1.99436e-12	-0.261894
GO_POSITIVE_REGULATION_OF_HISTONE_H3_K4_METHYLATION	0.00115319	-0.179514	0.0122035	-0.0947496	0.00196142	-0.171127	0.00154527	-0.119535	0.000526404	-0.19127	0.000528358	-0.130765	0.00290428	-0.164678	1.76731e-05	-0.161576
GO_NEURON_PROJECTION_DEVELOPMENT	1.49101e-13	-0.394583	5.67301e-14	-0.279091	7.31081e-12	-0.368045	1.27731e-33	-0.434905	1.86292e-16	-0.435265	5.99364e-31	-0.418086	8.05741e-11	-0.350386	1.19804e-23	-0.366518
GO_MALE_GAMETE_GENERATION	0.0674859	0.101552	0.171324	0.051799	0.5694	0.0316729	0.61388	0.019116	0.189995	0.0728828	0.556323	0.0222891	0.344064	-0.0526503	0.266487	-0.0420858
GO_POSITIVE_REGULATION_OF_FIBROBLAST_MIGRATION	3.52429e-05	0.227324	0.0297471	0.082215	1.189e-05	0.240293	0.0404552	-0.0775251	0.000719172	0.186676	0.548185	0.0227501	0.79289	-0.0146197	0.0429972	-0.0765694
GO_NEGATIVE_REGULATION_OF_RESPONSE_TO_OXIDATIVE_STRESS	5.7736e-12	0.369725	9.5687e-13	0.265544	1.67036e-15	0.422514	2.70103e-31	0.42032	8.56733e-16	0.426452	6.42176e-32	0.424304	7.08938e-05	0.218569	1.90086e-12	0.262135
GO_CHAPERONE_MEDIATED_PROTEIN_COMPLEX_ASSEMBLY	0.0156516	-0.133979	0.000192313	-0.140591	0.000109536	-0.212937	0.720322	-0.0135655	8.62791e-06	-0.243986	0.0127549	-0.0941601	8.19539e-08	-0.292087	6.57931e-06	-0.169533
GO_ORGANELLE_TRANSPORT_ALONG_MICROTUBULE	0.000167408	-0.2073	5.23634e-08	-0.204072	6.40158e-05	-0.219869	6.36203e-14	-0.278556	3.07588e-06	-0.255483	2.89949e-13	-0.271362	3.45551e-06	-0.254213	2.16225e-18	-0.322589
GO_CHONDROCYTE_DEVELOPMENT	0.00197384	0.171025	2.85575e-15	0.292654	1.79181e-05	0.235484	0.00173089	0.118293	0.000575102	0.189978	5.35018e-12	0.256899	0.355423	-0.0514253	0.0382171	0.0784095
GO_MEMBRANE_RAFT_ORGANIZATION	4.93789e-21	0.490014	7.40388e-36	0.448296	4.13993e-35	0.614359	1.1379e-51	0.529057	1.99668e-30	0.578525	8.6246e-66	0.58639	2.5722e-06	0.257421	5.01672e-18	0.319255
GO_MITOTIC_SISTER_CHROMATID_SEGREGATION	0.0714808	0.100114	0.183864	0.0503238	0.227804	0.0670819	7.73399e-05	0.148929	0.144158	0.0811918	0.000285382	0.136831	0.641692	-0.0259076	0.861268	0.0066218
GO_MICROTUBULE_NUCLEATION	0.0862981	-0.0952959	2.5456e-14	-0.282801	0.0341282	-0.117561	2.86558e-38	-0.4621	0.00152398	-0.175158	2.02625e-35	-0.445725	5.52864e-05	-0.221724	2.35543e-20	-0.339822
GO_ESTABLISHMENT_OF_PROTEIN_LOCALIZATION_TO_ORGANELLE	0.62103	-0.0275247	0.0101482	-0.0971779	0.405771	-0.046269	0.101626	0.0619691	0.367831	-0.0501149	0.7462	0.0122632	0.425559	-0.0443485	0.788335	-0.0101726
GO_NEGATIVE_REGULATION_OF_ACUTE_INFLAMMATORY_RESPONSE	1.94067e-05	0.234537	2.04401e-37	0.457289	1.18198e-07	0.28862	8.04692e-37	0.453888	1.06847e-05	0.24153	3.55252e-47	0.508215	0.010117	0.142479	1.86962e-26	0.387438
GO_REGULATION_OF_SEQUESTERING_OF_CALCIUM_ION	2.55894e-06	0.257477	3.47889e-08	0.206726	1.12552e-08	0.31012	0.000116068	0.145268	1.32926e-07	0.287499	9.70081e-10	0.228602	0.199414	0.0713645	0.163711	0.0527345
GO_REGULATION_OF_MEMBRANE_LIPID_METABOLIC_PROCESS	5.20725e-07	0.274084	3.63518e-22	0.35482	2.67738e-11	0.358628	3.95553e-34	0.438006	2.08665e-07	0.283146	6.55889e-43	0.487001	0.172613	0.0758363	3.13191e-19	0.330091
GO_XENOPHAGY	2.809e-10	0.340744	2.92292e-08	0.207846	2.00978e-12	0.377119	4.86318e-35	0.443472	1.42309e-08	0.308052	1.66983e-34	0.440267	0.280251	0.0600715	7.91125e-11	0.242687
GO_DRUG_TRANSMEMBRANE_TRANSPORT	0.00137966	0.176724	1.90491e-07	0.195446	0.000111745	0.212675	9.36094e-12	0.254019	0.00059803	0.189405	6.54994e-12	0.255862	0.00874937	0.145213	0.0362502	0.0792238
GO_POSITIVE_REGULATION_OF_MEMBRANE_DEPOLARIZATION	0.143899	0.0812442	0.563965	-0.0218592	0.130287	0.0840999	0.0315161	0.0813499	0.281417	0.0599263	0.240438	0.0444583	0.252873	-0.0636052	0.937813	0.00295624
GO_MYD88_DEPENDENT_TOLL_LIKE_RECEPTOR_SIGNALING_PATHWAY	5.99243e-25	0.530127	7.92815e-75	0.617892	9.18107e-42	0.658442	2.19097e-61	0.569677	1.29322e-31	0.588053	1.08274e-100	0.691906	6.31466e-10	0.334307	4.37021e-31	0.418973
GO_REGULATION_OF_PROTEIN_POLYMERIZATION	0.000631883	0.188594	4.98034e-16	0.300253	3.59302e-07	0.2778	0.000319623	0.135734	0.000117692	0.211993	2.2983e-14	0.28327	0.628269	-0.0269556	0.0240882	0.0853162
GO_REGULATION_OF_PROTEIN_TARGETING_TO_MEMBRANE	0.00301577	-0.164047	6.41257e-07	-0.186971	0.00369158	-0.160622	0.000253017	-0.137988	3.71538e-05	-0.226675	6.35266e-06	-0.169809	4.24358e-05	-0.225031	1.29582e-05	-0.164115
GO_KIDNEY_EPITHELIUM_DEVELOPMENT	0.243736	-0.0648431	0.74903	-0.0121217	0.0520681	-0.107855	5.43133e-05	-0.152048	0.073938	-0.0992623	0.0306737	-0.0817566	8.26107e-05	-0.216605	0.0012584	-0.121756
GO_HISTONE_H2A_UBIQUITINATION	0.014534	-0.135453	1.44278e-05	-0.16324	0.00454539	-0.157029	0.00041321	-0.133216	0.00102579	-0.181315	4.02772e-05	-0.15464	0.00882555	-0.145051	9.39036e-11	-0.241752
GO_TOOTH_MINERALIZATION	0.000387114	0.195695	0.0562155	0.0722536	1.31245e-06	0.264578	0.19473	0.0491045	0.00344026	0.161824	0.0402571	0.0776016	0.664837	-0.0241216	0.787121	0.0102323
GO_REGULATION_OF_HAIR_CYCLE	3.02822e-05	0.22918	2.71979e-06	0.17635	9.35728e-06	0.243057	0.119408	0.0589554	6.70734e-11	0.351774	0.000380996	0.134017	0.000177455	0.206513	0.764765	-0.0113378
GO_NEGATIVE_REGULATION_OF_BONE_REMODELING	2.72429e-12	0.375007	7.52677e-39	0.46533	6.08102e-20	0.477834	1.08743e-21	0.350958	1.90457e-16	0.435139	9.53173e-37	0.453465	9.44085e-05	0.214877	6.71104e-12	0.255737
GO_POSITIVE_REGULATION_OF_RECEPTOR_MEDIATED_ENDOCYTOSIS	0.0012602	0.178138	5.27643e-23	0.361495	1.90954e-08	0.305437	1.22645e-08	0.21334	0.000179075	0.206391	5.47094e-19	0.327946	0.43016	-0.0439093	0.0710174	0.0683277
GO_ESTABLISHMENT_OF_MITOTIC_SPINDLE_ORIENTATION	0.0209164	0.128073	0.661112	0.0166096	0.0174703	0.131766	0.00207063	-0.116306	0.217414	0.0686022	0.0336299	-0.0803691	0.285182	-0.0594602	0.000407357	-0.133357
GO_POSITIVE_REGULATION_OF_PROTEIN_OLIGOMERIZATION	2.37326e-06	0.258288	1.48297e-15	0.295532	6.51623e-10	0.334055	2.62738e-36	0.450919	3.38075e-07	0.278405	8.03867e-40	0.470658	0.0312818	0.119485	4.36349e-08	0.20526
GO_SPINDLE_CHECKPOINT	0.0193188	-0.129713	0.676183	-0.0158254	0.0172781	-0.13199	0.726747	0.0132408	0.00204885	-0.170421	0.910419	-0.00426314	4.38018e-05	-0.224638	0.00684484	-0.102201
GO_POSITIVE_REGULATION_OF_STAT_CASCADE	1.07592e-23	0.517848	9.78058e-60	0.563162	8.04858e-35	0.612276	7.97381e-63	0.575243	1.86094e-30	0.578774	2.54327e-99	0.688476	2.33331e-10	0.342197	1.5234e-34	0.440506
GO_LEUKOTRIENE_BIOSYNTHETIC_PROCESS	5.02548e-22	0.500692	7.4776e-41	0.476215	3.67371e-33	0.599996	6.8549e-42	0.481705	1.15538e-33	0.60377	4.3417e-53	0.535346	1.40966e-13	0.394949	1.79029e-40	0.474184
GO_POSITIVE_REGULATION_OF_SUBSTRATE_ADHESION_DEPENDENT_CELL_SPREADING	6.07923e-14	0.400375	3.97937e-40	0.472314	1.55426e-18	0.461356	8.04259e-37	0.453889	1.30929e-14	0.410033	2.08799e-58	0.557804	0.00359555	0.161073	4.90665e-22	0.353768
GO_POSITIVE_REGULATION_OF_THYMOCYTE_AGGREGATION	6.20286e-14	0.400246	5.17797e-10	0.232216	1.3089e-16	0.437267	7.58091e-16	0.298446	5.79523e-17	0.441839	5.03658e-21	0.345463	0.0023608	0.16811	4.78342e-05	0.153155
GO_CATECHOLAMINE_METABOLIC_PROCESS	0.359993	0.0509394	0.000170595	-0.141714	0.713659	-0.0204311	0.00903804	-0.0986779	0.560292	0.0324226	0.00190713	-0.117221	0.703587	-0.0211846	0.00346679	-0.110417
GO_POSITIVE_REGULATION_OF_PROTEIN_COMPLEX_DISASSEMBLY	0.428714	-0.044047	2.32175e-05	-0.159311	0.262152	-0.0623793	0.000725068	-0.127546	0.0237686	-0.125397	0.00738742	-0.101244	2.55977e-05	-0.231218	7.27788e-05	-0.14947
GO_BLASTOCYST_FORMATION	0.000103636	0.213662	0.45431	-0.0283464	0.000292083	0.199667	0.541933	0.0231065	0.000897755	0.183345	0.516193	0.0245962	0.306682	-0.0568752	0.00058753	-0.129694
GO_REGULATION_OF_WATER_LOSS_VIA_SKIN	0.000724484	0.186567	0.42912	-0.0299539	0.00913053	0.144415	0.407045	-0.0314081	0.00995935	0.142776	0.998252	8.3e-05	0.694446	0.0218719	0.404836	-0.0315562
GO_NEGATIVE_REGULATION_OF_REGULATED_SECRETORY_PATHWAY	1.34182e-06	0.264346	1.12333e-48	0.515333	6.5911e-11	0.351906	2.19006e-21	0.348462	7.06252e-09	0.314182	1.62745e-43	0.490103	0.0208861	0.128103	4.14546e-10	0.233482
GO_CELL_DIFFERENTIATION_INVOLVED_IN_METANEPHROS_DEVELOPMENT	3.92045e-10	0.338113	3.45419e-16	0.301817	8.52887e-11	0.349954	1.12391e-13	0.275882	1.07404e-08	0.310531	4.52153e-21	0.345854	0.00533872	0.1542	2.09919e-08	0.209957
GO_POSITIVE_REGULATION_OF_ALCOHOL_BIOSYNTHETIC_PROCESS	0.000147837	0.208967	2.30113e-05	0.159385	1.05545e-05	0.241672	0.00603556	0.103763	0.00272982	0.165711	4.72844e-06	0.172113	0.357224	-0.0512333	0.514317	0.0247063
GO_REGULATION_OF_EPITHELIAL_CELL_DIFFERENTIATION_INVOLVED_IN_KIDNEY_DEVELOPMENT	5.30116e-07	0.273904	1.58082e-27	0.395051	2.38241e-08	0.303453	1.80186e-21	0.34916	6.31056e-07	0.272138	1.37706e-34	0.44077	0.00969007	0.143295	3.80001e-08	0.206156
GO_MAGNESIUM_ION_TRANSPORT	0.108533	0.0891855	0.0333344	0.080503	0.000834012	0.184457	0.00208087	0.11625	0.145015	0.0810194	9.62191e-05	0.14697	0.210218	-0.069686	0.0732379	-0.0677983
GO_PYRIMIDINE_RIBONUCLEOSIDE_METABOLIC_PROCESS	3.1835e-16	0.432199	8.28814e-19	0.326338	2.82891e-16	0.432877	1.16236e-42	0.485718	1.0828e-18	0.463238	3.90718e-45	0.49825	4.24339e-09	0.318554	2.07488e-24	0.372346
GO_PROTEIN_LOCALIZATION_TO_CENTROSOME	0.0836697	-0.096099	0.774894	-0.0108358	0.0988557	-0.0917095	0.000514494	-0.131032	0.0376462	-0.115364	0.00566453	-0.104542	0.00189726	-0.171663	0.00347039	-0.110405
GO_POSITIVE_REGULATION_OF_B_CELL_PROLIFERATION	2.52191e-25	0.533712	2.43562e-74	0.616279	1.12586e-38	0.638869	6.54594e-53	0.534562	1.35317e-35	0.617828	4.37631e-90	0.664048	9.40157e-11	0.349212	9.06363e-29	0.40362
GO_POSITIVE_REGULATION_OF_ORGANELLE_ORGANIZATION	0.00058361	0.189763	0.000327711	0.135491	0.000826884	0.184586	7.35036e-05	0.149382	0.00323855	0.162847	1.33051e-08	0.212831	0.268524	-0.0615547	0.582419	0.0208325
GO_MUSCLE_CELL_PROLIFERATION	0.415873	0.0452818	0.000534488	0.130649	0.816451	0.0129245	0.47586	-0.0270107	0.723397	-0.0197061	0.0361906	0.079249	0.0307087	-0.11989	0.529379	-0.0238285
GO_VENTRAL_SPINAL_CORD_INTERNEURON_SPECIFICATION	0.000256526	-0.201472	0.000445965	-0.13246	1.33668e-05	-0.238931	9.62995e-11	-0.241614	0.00391276	-0.159625	2.41817e-10	-0.23652	0.562415	-0.0322474	0.146323	-0.0550009
GO_AMINO_ACID_TRANSMEMBRANE_TRANSPORT	0.00930177	-0.144066	2.00872e-07	-0.195083	0.000411066	-0.194838	4.17555e-10	-0.233441	1.59567e-06	-0.262521	1.16351e-12	-0.264578	9.26217e-05	-0.215125	1.15052e-09	-0.22761
GO_CELLULAR_RESPONSE_TO_ACID_CHEMICAL	1.08114e-07	0.289469	1.30921e-18	0.324557	1.28987e-11	0.363964	1.00527e-09	0.228395	2.49926e-08	0.303021	3.89938e-22	0.354574	0.648228	-0.0254006	0.0157338	0.0913175
GO_PHAGOCYTOSIS_ENGULFMENT	3.56297e-23	0.512607	5.52332e-60	0.564151	1.58229e-37	0.631215	1.58123e-52	0.532873	1.15519e-31	0.588439	1.6757e-82	0.642101	5.83695e-10	0.334939	4.34891e-34	0.437756
GO_REGULATION_OF_TOLERANCE_INDUCTION	1.0875e-21	0.497126	8.1888e-71	0.60433	9.71824e-34	0.604331	2.49417e-62	0.573339	3.31866e-33	0.60033	1.48268e-89	0.662573	2.89897e-10	0.340496	5.34662e-26	0.384139
GO_REGULATION_OF_CORTICOSTEROID_HORMONE_SECRETION	1.38259e-05	-0.238536	0.32967	-0.0369231	2.91716e-08	-0.301623	0.341751	-0.036012	1.85346e-07	-0.284297	0.298855	-0.0393497	0.00815812	-0.146515	0.0858978	-0.0650074
GO_CELLULAR_SENESCENCE	4.44094e-10	0.337122	2.27491e-09	0.223597	8.31538e-10	0.332086	1.20528e-25	0.38156	4.94144e-10	0.336271	1.02083e-28	0.403269	0.313988	0.0560241	4.72912e-07	0.189133
GO_SULFATION	0.000333594	0.197803	8.87006e-07	0.184639	6.13548e-06	0.247848	0.15898	0.0533323	7.95275e-06	0.244914	0.000556408	0.130244	0.00185666	0.172011	0.000427486	0.13288
GO_REGULATION_OF_MEIOTIC_CELL_CYCLE	0.0101623	0.142394	0.278478	0.0410471	0.0745738	0.0990456	0.000795251	0.126592	0.146295	0.0807632	0.000302454	0.136269	0.0091333	-0.144409	0.0286985	0.0827489
GO_DNA_DEALKYLATION	0.642581	0.0258385	0.129568	0.0573886	0.196962	0.0717546	0.270784	0.04171	0.576312	-0.0311079	0.873783	0.00601919	0.239492	-0.0654292	0.834483	0.00791749
GO_ACTIN_FILAMENT_BASED_MOVEMENT	0.965858	-0.0023835	1.10742e-06	0.183027	0.916259	-0.00585504	0.888744	-0.00530069	0.818598	0.0127706	0.0141492	0.092764	0.403649	-0.0464782	0.0524916	0.0733752
GO_POSITIVE_REGULATION_OF_EPITHELIAL_CELL_PROLIFERATION	1.68752e-13	0.393775	4.57927e-23	0.361979	3.06953e-19	0.469714	4.89771e-27	0.391591	9.77509e-17	0.438913	4.82732e-42	0.482502	0.0225708	0.126485	1.04706e-09	0.228159
GO_SARCOMERE_ORGANIZATION	0.00602419	-0.152045	0.000217056	-0.139448	0.00550206	-0.153665	3.39387e-09	-0.221207	0.113471	-0.0879656	3.73814e-09	-0.220625	0.0588689	-0.104907	0.0207991	-0.0874222
GO_POSITIVE_REGULATION_OF_B_CELL_MEDIATED_IMMUNITY	1.59952e-30	0.579309	7.96458e-55	0.542868	3.0258e-42	0.66137	8.91891e-75	0.617723	5.11431e-41	0.653846	6.02547e-98	0.684987	1.37876e-16	0.436973	3.13148e-35	0.444607
GO_OVULATION_CYCLE	1.64311e-12	0.378509	5.51017e-14	0.279227	1.64803e-17	0.448764	6.18499e-12	0.256156	3.28314e-15	0.418474	2.98006e-21	0.347357	0.154935	0.0790769	0.00375433	0.109482
GO_NEGATIVE_REGULATION_OF_NITRIC_OXIDE_METABOLIC_PROCESS	2.34375e-27	0.552379	2.30229e-30	0.414276	4.73948e-37	0.627974	1.82534e-59	0.562077	7.03642e-36	0.619837	3.83242e-70	0.602001	8.56355e-09	0.31251	2.19264e-22	0.356584
GO_VENTRICULAR_SYSTEM_DEVELOPMENT	0.000171379	-0.206984	0.881788	0.00563449	9.38428e-05	-0.214955	4.71438e-06	-0.172137	2.49099e-05	-0.231547	0.00815164	-0.0999985	0.000194236	-0.205289	0.00409731	-0.108449
GO_ADULT_LOCOMOTORY_BEHAVIOR	1.64252e-10	-0.344927	2.28316e-20	-0.339937	1.03327e-08	-0.31087	4.55397e-34	-0.437635	1.35765e-11	-0.363593	1.21599e-37	-0.458568	6.08985e-07	-0.2725	5.67926e-26	-0.383948
GO_REGULATION_OF_ACTIVATED_T_CELL_PROLIFERATION	8.53215e-30	0.573339	1.32835e-70	0.603602	2.18242e-43	0.668177	4.69775e-64	0.579917	3.30774e-45	0.678663	5.89508e-94	0.674574	7.06666e-16	0.427579	3.34837e-38	0.461721
GO_POSITIVE_REGULATION_OF_HOMEOSTATIC_PROCESS	4.64944e-06	0.250944	0.0131483	0.093753	8.02269e-08	0.292287	5.44882e-08	0.203811	1.15992e-05	0.24058	1.8488e-08	0.210762	0.225637	-0.0673948	0.369089	-0.0340234
GO_RESPONSE_TO_GRAVITY	0.0499716	0.108829	6.47251e-09	0.217291	0.0441747	0.11171	7.36063e-12	0.255261	0.0152647	0.134479	8.54714e-18	0.317122	0.236096	0.0659034	1.78176e-06	0.179524
GO_REGULATION_OF_IMMUNOGLOBULIN_SECRETION	1.61383e-25	0.535544	1.86159e-39	0.468669	9.60412e-33	0.596822	6.08525e-54	0.539066	1.17698e-32	0.596146	1.21158e-73	0.613959	4.45615e-12	0.371557	2.81297e-26	0.38616
GO_ACETYL_COA_METABOLIC_PROCESS	8.39365e-10	-0.33201	2.69884e-26	-0.386289	1.6834e-15	-0.422468	7.70741e-27	-0.390192	5.85201e-16	-0.428678	1.60547e-36	-0.452159	3.07392e-08	-0.301148	3.99079e-15	-0.291171
GO_CREATINE_METABOLIC_PROCESS	0.000339728	-0.197546	0.0387922	-0.0781781	6.92649e-07	-0.271189	0.00244021	-0.114458	0.00016074	-0.207846	0.000564067	-0.130106	0.94419	-0.00389816	0.183653	0.050348
GO_REGULATION_OF_CELLULAR_COMPONENT_BIOGENESIS	0.778332	-0.0156739	0.0157469	0.091306	0.276113	0.0605899	2.60512e-06	-0.176676	0.861293	-0.00972943	0.124905	-0.0580953	0.0116055	-0.139852	0.00395888	-0.108856
GO_POSITIVE_REGULATION_OF_MACROPHAGE_DERIVED_FOAM_CELL_DIFFERENTIATION	3.071e-14	0.404709	1.2765e-39	0.469564	1.11459e-20	0.486118	2.26136e-31	0.420815	2.8242e-18	0.45822	2.10375e-46	0.504483	7.7694e-05	0.217395	7.38417e-18	0.317709
GO_IRON_ION_TRANSPORT	1.39127e-08	0.308252	0.00196833	0.11687	5.22381e-12	0.370434	4.87341e-18	0.31937	3.16743e-07	0.279051	1.18476e-14	0.28629	0.0752327	0.0988226	0.00688719	0.102124
GO_REGULATION_OF_RECEPTOR_BINDING	1.72133e-09	0.326127	3.40467e-14	0.281461	1.74894e-10	0.344441	4.41129e-27	0.391912	2.75015e-13	0.390565	1.89129e-29	0.408213	0.0160458	0.133481	1.83601e-05	0.161261
GO_POSITIVE_REGULATION_OF_POTASSIUM_ION_TRANSPORT	9.63958e-10	-0.330886	4.56025e-06	-0.172394	1.41151e-08	-0.308125	3.17751e-20	-0.338714	3.839e-11	-0.355958	7.65996e-19	-0.326644	5.71075e-06	-0.248652	2.92966e-09	-0.222089
GO_POSITIVE_REGULATION_OF_NERVOUS_SYSTEM_DEVELOPMENT	2.65566e-13	-0.390796	1.06836e-14	-0.286758	3.56547e-12	-0.373125	1.80531e-33	-0.433984	1.22317e-15	-0.424358	1.85635e-30	-0.414888	5.68854e-11	-0.353016	1.61027e-21	-0.349561
GO_REGULATION_OF_CARDIAC_MUSCLE_CELL_PROLIFERATION	0.026484	-0.123096	0.967998	0.00152016	0.0147655	-0.13514	0.00519913	-0.105588	0.00205728	-0.170355	0.250833	-0.0434911	0.000742278	-0.186205	0.0893815	-0.0642982
GO_CELLULAR_RESPONSE_TO_OXYGEN_CONTAINING_COMPOUND	3.22413e-10	0.339659	7.21467e-31	0.417564	3.53269e-15	0.418033	3.25145e-19	0.329947	2.74993e-10	0.34091	4.05469e-39	0.466813	0.665725	0.0240535	6.27148e-09	0.217484
GO_REGULATION_OF_INTERLEUKIN_10_SECRETION	2.23237e-21	0.493766	2.08565e-66	0.588653	9.41404e-39	0.639379	3.13563e-61	0.569068	1.03185e-36	0.625652	1.19332e-89	0.662836	2.153e-13	0.392178	1.20506e-39	0.469701
GO_REGULATION_OF_LAMELLIPODIUM_ASSEMBLY	8.60676e-12	0.366878	4.7963e-29	0.405494	1.69327e-13	0.393753	2.34368e-15	0.293525	5.5041e-11	0.353264	9.32949e-35	0.441783	0.00232536	0.168358	9.57593e-11	0.241645
GO_CELLULAR_KETONE_METABOLIC_PROCESS	0.128041	0.0845929	0.000986744	-0.12434	0.151762	0.0796878	0.023038	0.08596	0.0178613	0.131316	0.597549	0.0200019	0.019228	0.12981	0.020332	0.0877444
GO_CRANIAL_NERVE_DEVELOPMENT	0.400043	-0.0468353	0.0628703	0.0703944	0.111127	-0.0885395	0.0111894	0.0958982	0.563995	-0.0321171	0.000324671	0.135581	0.955988	0.00307314	0.0654361	0.0697209
GO_WNT_SIGNALING_PATHWAY_CALCIUM_MODULATING_PATHWAY	2.51653e-05	-0.231424	0.0413521	0.0771822	0.00047057	-0.192896	0.000302135	-0.136279	6.67199e-05	-0.219343	0.219516	-0.0464984	2.94629e-06	-0.25595	0.132819	-0.0569074
GO_EPIDERMAL_GROWTH_FACTOR_RECEPTOR_SIGNALING_PATHWAY	0.784505	0.0152262	6.93114e-15	0.288707	0.165413	0.0771246	0.982689	-0.000822176	0.423551	-0.0445409	0.000114517	0.145391	0.00185644	-0.172013	0.76999	-0.0110786
GO_CELL_PROLIFERATION_IN_FOREBRAIN	0.118967	-0.0866559	0.743378	0.0124045	0.424157	-0.0444827	0.0021294	-0.115992	0.0637786	-0.102949	0.198568	-0.0486858	0.016635	-0.132756	0.0177628	-0.0896414
GO_RESPONSE_TO_MURAMYL_DIPEPTIDE	1.45496e-20	0.484831	3.85002e-59	0.560775	3.00124e-29	0.568773	1.80327e-39	0.468745	3.80485e-28	0.559329	1.36132e-66	0.58933	1.40661e-09	0.327794	6.12072e-31	0.418027
GO_REGULATION_OF_POSITIVE_CHEMOTAXIS	6.40575e-08	0.294393	2.74443e-08	0.208249	5.24879e-08	0.296243	4.54265e-15	0.290595	3.43119e-08	0.300147	2.81033e-21	0.347567	0.0153129	0.134416	1.1219e-10	0.240777
GO_REGULATION_OF_IMMUNE_RESPONSE	1.11906e-33	0.603874	1.67221e-77	0.626578	7.88883e-56	0.732241	5.58325e-88	0.658135	2.20973e-47	0.690652	6.08198e-127	0.749424	1.15932e-11	0.364736	2.23589e-37	0.457068
GO_NEGATIVE_REGULATION_OF_NOTCH_SIGNALING_PATHWAY	0.869758	0.00913016	0.000262506	-0.137635	0.661358	0.0243884	0.0742268	-0.0675667	0.248432	0.0642029	0.111758	-0.0602054	0.718404	0.0200775	0.58396	-0.0207474
GO_MEMBRANE_LIPID_CATABOLIC_PROCESS	3.23922e-19	0.46944	1.19786e-26	0.388825	1.84633e-35	0.616868	5.24841e-49	0.516879	1.30985e-18	0.462248	5.51512e-50	0.52141	0.00934229	0.143984	7.70227e-15	0.288233
GO_POSITIVE_REGULATION_OF_NEUROBLAST_PROLIFERATION	0.112343	0.0882407	0.00620725	0.103416	0.425655	0.0443392	0.04671	0.0752559	0.219698	0.0682637	0.00104914	0.123693	0.085029	0.0956811	0.0682528	0.0690061
GO_CARTILAGE_MORPHOGENESIS	9.38115e-07	0.268073	0.0164156	0.0907341	3.58925e-05	0.2271	3.2345e-08	0.207195	1.80112e-08	0.305959	2.32532e-09	0.223467	0.0938944	0.0930803	0.0032472	0.11118
GO_PEPTIDE_SECRETION	0.00890008	-0.144894	4.6907e-16	-0.30051	2.26886e-05	-0.23267	1.08415e-09	-0.227956	3.73651e-09	-0.319634	5.85515e-14	-0.278944	1.39411e-08	-0.308234	6.19761e-14	-0.278678
GO_THIOESTER_METABOLIC_PROCESS	0.0124973	-0.138418	2.67659e-08	-0.208409	0.00139152	-0.17659	0.000185031	-0.140953	3.1617e-05	-0.228654	2.05029e-07	-0.194943	8.88316e-06	-0.243652	2.8589e-07	-0.192653
GO_NEGATIVE_REGULATION_OF_INTRINSIC_APOPTOTIC_SIGNALING_PATHWAY_IN_RESPONSE_TO_DNA_DAMAGE	4.56135e-14	0.402206	6.30762e-12	0.256055	1.54757e-16	0.436318	2.10611e-38	0.462847	5.60751e-15	0.415236	8.71389e-35	0.441961	0.0719177	0.099961	5.71532e-15	0.289571
GO_REGULATION_OF_T_HELPER_2_CELL_DIFFERENTIATION	2.06299e-18	0.459873	2.18163e-51	0.527788	1.27365e-27	0.554729	1.21238e-42	0.485623	2.38679e-29	0.56961	2.34016e-76	0.622891	0.00186283	0.171958	4.41355e-23	0.362105
GO_NEGATIVE_REGULATION_OF_CELLULAR_AMIDE_METABOLIC_PROCESS	0.0129181	-0.137772	0.871666	0.00612099	0.10182	-0.0909164	0.000147341	-0.143076	0.0168529	-0.132493	0.0263179	-0.0840262	0.00141367	-0.176342	0.0189358	-0.0887475
GO_PURINE_RIBONUCLEOSIDE_BISPHOSPHATE_METABOLIC_PROCESS	8.67049e-06	0.243929	5.4406e-05	0.152034	6.47157e-08	0.294298	1.16461e-11	0.252885	7.50766e-07	0.270365	3.61929e-10	0.234251	0.00295741	0.164375	0.00111998	0.123
GO_PEPTIDYL_CYSTEINE_MODIFICATION	0.000664411	0.187852	0.00125373	0.121796	0.0267285	0.122899	9.06014e-14	0.276898	0.194773	0.072106	2.44407e-14	0.282987	0.00900573	-0.144673	0.684872	0.0153763
GO_LEUKOCYTE_DIFFERENTIATION	6.86259e-30	0.574123	1.12656e-81	0.639592	1.09266e-50	0.707816	2.19147e-73	0.613097	2.9434e-40	0.649078	2.87362e-117	0.729889	1.4967e-09	0.327283	1.02704e-34	0.441534
GO_RESPONSE_TO_EXOGENOUS_DSRNA	6.19569e-17	0.441467	1.66187e-36	0.452072	8.05911e-25	0.52889	1.27491e-18	0.324661	2.02334e-18	0.459975	8.37227e-37	0.453789	0.016228	0.133254	1.05681e-11	0.25339
GO_MORPHOGENESIS_OF_EMBRYONIC_EPITHELIUM	0.0286138	0.121429	1.86201e-07	0.195602	0.035574	0.116636	0.203916	0.048112	0.0283149	0.121657	1.25988e-05	0.164343	0.975782	0.00169044	0.0117259	0.0952796
GO_SKELETAL_MUSCLE_CONTRACTION	0.0183023	-0.13082	0.000253289	0.137977	0.00119377	-0.178979	0.496904	0.0257379	0.0048245	-0.155986	0.42128	0.0304652	0.303845	0.0572093	2.36794e-05	0.159146
GO_POSITIVE_REGULATION_OF_HORMONE_METABOLIC_PROCESS	0.000542138	0.190841	0.000956242	0.12467	0.0166882	0.132692	0.00167743	0.118637	0.127879	0.0846286	5.15223e-05	0.152509	0.319129	0.0554331	0.0209932	0.0872901
GO_TONGUE_DEVELOPMENT	1.75104e-05	0.235757	0.0260341	0.084185	0.000928868	0.182828	8.46492e-06	0.167539	3.53221e-06	0.253972	6.08689e-07	0.187342	0.000308573	0.198899	0.00229191	0.115166
GO_BONE_GROWTH	5.27407e-12	0.370367	1.51825e-21	0.349771	1.31634e-15	0.423925	5.7514e-22	0.353209	3.51175e-14	0.403863	8.357e-31	0.417149	0.0302578	0.120214	6.65337e-10	0.23078
GO_ACTIN_POLYMERIZATION_OR_DEPOLYMERIZATION	4.08897e-08	0.298544	3.32353e-27	0.392782	4.92393e-11	0.3541	2.21261e-17	0.313271	8.59605e-11	0.349894	1.72388e-30	0.415099	0.000368995	0.196376	7.26842e-18	0.317772
GO_UV_PROTECTION	4.58145e-07	0.275373	2.79945e-19	0.33052	1.07417e-12	0.381421	5.73135e-21	0.344995	2.49027e-13	0.39122	2.12355e-26	0.38704	1.04871e-08	0.31074	4.08224e-16	0.301104
GO_PROTEIN_MODIFICATION_BY_SMALL_PROTEIN_REMOVAL	1.33066e-06	-0.264434	2.67248e-10	-0.235959	3.11273e-06	-0.255353	1.94828e-28	-0.401351	1.79624e-10	-0.344234	5.22896e-27	-0.391389	3.30883e-08	-0.300478	1.44779e-22	-0.358024
GO_REGULATION_OF_NITRIC_OXIDE_BIOSYNTHETIC_PROCESS	1.06618e-23	0.517888	5.5464e-48	0.512063	3.55826e-33	0.600101	1.76493e-40	0.474217	6.41083e-28	0.557352	8.45165e-70	0.600799	1.87631e-07	0.284179	6.05017e-27	0.390939
GO_PHOSPHATIDYLGLYCEROL_METABOLIC_PROCESS	0.00298513	-0.164218	4.75247e-09	-0.219174	0.00491072	-0.155675	1.44061e-12	-0.263518	0.0131018	-0.137496	1.49783e-16	-0.305354	0.221004	-0.0680712	1.45074e-06	-0.181046
GO_PYRIMIDINE_NUCLEOSIDE_BIOSYNTHETIC_PROCESS	7.32693e-05	0.218147	6.81068e-08	0.202346	0.000944134	0.18258	1.44255e-29	0.409	0.00376616	0.16028	5.30315e-29	0.405199	0.0832307	0.0962351	1.96718e-15	0.294295
GO_TRANSLATIONAL_TERMINATION	0.706879	0.0209379	0.000749526	-0.127204	0.233393	-0.0662843	2.18909e-08	0.209691	0.587179	0.0302259	0.0196345	0.0882378	0.202548	0.0708711	0.0842404	0.065353
GO_CYTOKINETIC_PROCESS	2.76943e-05	0.230266	0.879003	-0.00576826	0.000138306	0.209856	0.112048	0.0601568	0.000171625	0.206964	0.303687	0.0389586	0.473764	0.0398748	0.422235	0.0304026
GO_ENDOCARDIAL_CUSHION_MORPHOGENESIS	0.592581	0.0297902	0.1105	-0.0604173	0.875742	-0.00870716	0.394334	-0.0322668	0.482213	0.0391173	0.381532	-0.0331487	0.440668	-0.0429167	0.153144	-0.0540886
GO_REGULATION_OF_INNATE_IMMUNE_RESPONSE	3.99459e-31	0.584165	3.44818e-72	0.609052	2.41322e-50	0.706086	1.04933e-78	0.630393	7.19588e-39	0.640144	2.83944e-115	0.725635	6.49864e-10	0.334076	4.23937e-32	0.425445
GO_VESICLE_MEDIATED_TRANSPORT	1.80649e-05	0.235388	2.97065e-16	0.302459	8.37815e-10	0.332025	1.45219e-06	0.181039	8.06456e-06	0.244756	3.17238e-14	0.281787	0.330427	-0.0541554	0.126071	0.0579168
GO_INTERLEUKIN_1_PRODUCTION	8.01628e-22	0.49854	6.59756e-67	0.590476	3.49442e-34	0.60762	5.32387e-51	0.52604	3.65058e-28	0.559486	1.17093e-86	0.654354	1.31975e-08	0.308719	7.82069e-31	0.417336
GO_MODULATION_BY_HOST_OF_VIRAL_PROCESS	2.19072e-08	0.304207	3.70332e-05	0.155361	1.94352e-10	0.343622	7.8909e-07	0.185483	1.98028e-08	0.305112	1.65804e-09	0.225468	0.798817	0.0141921	0.137405	0.0562439
GO_REGULATION_OF_DNA_REPAIR	0.0207921	-0.128197	0.577379	-0.0211114	0.011969	-0.139256	0.15525	0.0538131	0.00637022	-0.15104	0.420367	0.0305251	0.0241152	-0.125091	0.132362	-0.0569745
GO_REGULATION_OF_MEMBRANE_LIPID_DISTRIBUTION	1.26783e-12	0.380289	5.42204e-33	0.431036	5.69168e-18	0.454498	5.41279e-18	0.318951	9.74832e-15	0.411853	2.29223e-31	0.420777	0.0104779	0.141812	2.01404e-06	0.17861
GO_REFLEX	3.5232e-11	-0.356597	3.17322e-16	-0.302179	5.93849e-14	-0.400525	8.07867e-47	-0.506497	3.7345e-12	-0.3728	5.65164e-43	-0.487333	3.16225e-06	-0.255181	1.05097e-21	-0.351079
GO_LEUKOCYTE_MEDIATED_IMMUNITY	4.7495e-32	0.591463	2.21841e-68	0.595781	4.70321e-49	0.699485	6.59396e-87	0.655072	5.41016e-49	0.69917	1.41182e-122	0.740826	7.87082e-14	0.398719	5.30862e-36	0.449141
GO_ORGANOPHOSPHATE_BIOSYNTHETIC_PROCESS	0.390592	0.0477804	0.00137264	0.120821	0.589545	0.0300348	3.2747e-14	0.281641	0.593704	-0.0296998	1.22021e-13	0.275493	0.0180989	-0.131047	6.60985e-06	0.169497
GO_NEGATIVE_REGULATION_OF_SERINE_TYPE_PEPTIDASE_ACTIVITY	1.45763e-07	0.286615	0.824325	0.00841115	1.04741e-05	0.24176	1.6854e-10	0.238531	2.17801e-06	0.25921	1.97329e-07	0.195205	0.0196773	0.129335	0.0566087	0.0721388
GO_PROTEIN_LOCALIZATION_TO_CELL_PERIPHERY	0.374464	-0.0494256	0.640576	0.0176898	0.915254	-0.00592555	0.000699308	-0.127918	0.344661	-0.0525853	0.0702716	-0.0685085	0.00577433	-0.152804	0.000432139	-0.132773
GO_REGULATION_OF_PROTEIN_GLYCOSYLATION	0.117734	0.0869454	0.000640012	0.128824	0.00319432	0.163079	0.415385	0.0308534	0.0772627	0.0981455	0.0108622	0.0962886	0.176917	-0.0750851	0.0044454	-0.107477
GO_NEGATIVE_REGULATION_OF_FIBROBLAST_PROLIFERATION	1.25204e-11	0.36418	9.92161e-29	0.403353	4.42914e-17	0.443333	2.17711e-46	0.50441	3.43182e-16	0.431767	2.98734e-56	0.548905	2.43283e-10	0.341871	2.85381e-25	0.3788
GO_REGULATION_OF_MUSCLE_TISSUE_DEVELOPMENT	0.0414247	-0.11319	0.00704493	-0.101841	0.0117649	-0.139589	9.48309e-13	-0.265589	0.00257632	-0.166671	3.86062e-09	-0.220431	8.59498e-05	-0.216094	0.00323157	-0.111236
GO_ORGANIC_ACID_BIOSYNTHETIC_PROCESS	0.208881	0.0698903	0.000565085	0.130088	0.663041	0.0242592	3.15503e-06	0.175223	0.570961	-0.0315451	7.8153e-06	0.168173	0.291662	-0.0586678	0.000342085	0.135072
GO_NEGATIVE_REGULATION_OF_DNA_DEPENDENT_DNA_REPLICATION	1.64597e-09	-0.326498	4.10721e-08	-0.205652	2.10575e-10	-0.342998	3.09296e-16	-0.302288	6.39381e-11	-0.352136	2.79802e-18	-0.321572	1.23097e-06	-0.265249	2.24541e-22	-0.356501
GO_REGULATION_OF_LEUKOCYTE_MIGRATION	4.17381e-31	0.584012	5.8821e-60	0.564042	1.18574e-44	0.675513	1.01609e-80	0.636666	6.96164e-42	0.659175	3.66521e-113	0.721045	1.15897e-12	0.380902	2.41244e-36	0.451135
GO_ORGAN_MATURATION	0.15315	0.0794193	3.68444e-17	0.311183	0.0315523	0.119296	0.0116079	0.0954135	0.0755285	0.0987231	3.07335e-09	0.221802	0.120837	0.0862209	4.97855e-11	0.245195
GO_REGULATION_OF_CELLULAR_RESPONSE_TO_HEAT	0.322794	-0.0550155	0.00277081	-0.11301	0.356915	-0.0512662	0.00232344	-0.115012	0.00538685	-0.154041	0.00582527	-0.104199	0.000145159	-0.209211	1.40319e-09	-0.226449
GO_POSITIVE_REGULATION_OF_ACUTE_INFLAMMATORY_RESPONSE	2.85498e-23	0.513584	3.05262e-40	0.472936	4.96987e-29	0.566921	5.68438e-58	0.55603	1.00529e-31	0.588914	5.97879e-87	0.655194	1.30629e-08	0.308809	9.67387e-23	0.359416
GO_GASTRULATION_WITH_MOUTH_FORMING_SECOND	0.0013726	-0.176804	0.0270898	0.0836015	0.000235034	-0.20268	0.0185178	-0.0890604	9.89377e-07	-0.267523	0.913397	0.00412083	3.73149e-05	-0.226621	0.901396	-0.00469462
GO_ENDOCARDIUM_DEVELOPMENT	0.523288	-0.0355314	0.506471	-0.0251688	0.684549	-0.0226197	0.00285626	-0.112662	0.197405	-0.071684	0.0188562	-0.0888066	0.00377153	-0.160256	1.70524e-05	-0.16187
GO_ENDOTHELIAL_CELL_DIFFERENTIATION	0.103127	0.0905725	2.21689e-08	0.209611	0.342425	0.0528292	3.68328e-05	0.155407	0.161892	0.0777701	4.84276e-08	0.204582	0.14475	-0.0810727	0.16372	0.0527333
GO_NEGATIVE_REGULATION_OF_CELLULAR_PROTEIN_LOCALIZATION	0.00700441	0.149318	5.90063e-07	0.187564	8.83209e-06	0.243718	4.35994e-05	0.153957	0.0150653	0.134741	7.42897e-10	0.230146	0.729448	-0.0192572	6.96092e-05	0.149865
GO_INSEMINATION	0.0142859	0.135794	2.91231e-06	-0.175832	0.155893	0.0788944	0.00636863	-0.103098	0.00648677	0.150712	6.96943e-05	-0.149854	0.024488	0.124766	0.0175828	-0.0897831
GO_REGULATION_OF_NUCLEOBASE_CONTAINING_COMPOUND_TRANSPORT	0.145013	-0.0810199	0.751941	-0.0119763	0.149479	-0.0801332	2.82462e-13	-0.271488	0.250259	-0.0639561	3.01915e-08	-0.207638	0.285399	-0.0594335	0.000228576	-0.138957
GO_PHOSPHATIDYLINOSITOL_3_PHOSPHATE_BIOSYNTHETIC_PROCESS	6.60949e-07	-0.271667	0.218146	-0.0466367	8.41422e-06	-0.244272	1.54951e-19	-0.332772	1.50172e-08	-0.307576	8.01736e-11	-0.242615	5.77202e-07	-0.273043	2.65237e-09	-0.222683
GO_CYCLIC_NUCLEOTIDE_CATABOLIC_PROCESS	2.17085e-07	-0.282761	1.7366e-09	-0.225196	2.2414e-06	-0.258902	6.8437e-17	-0.308625	4.99447e-10	-0.336186	2.72364e-19	-0.330625	4.47716e-10	-0.337058	1.49717e-13	-0.274523
GO_RESPONSE_TO_EPIDERMAL_GROWTH_FACTOR	0.985579	-0.0010065	0.31454	-0.038095	0.977688	-0.00155734	4.91984e-06	-0.171805	0.608012	-0.0285555	0.00570839	-0.104448	0.00455404	-0.156996	0.000377937	-0.134096
GO_POSITIVE_REGULATION_OF_TRANSMEMBRANE_TRANSPORT	0.00164206	0.173975	9.96387e-05	0.146655	0.000597126	0.189427	0.122608	0.058451	0.000298716	0.199353	0.000437053	0.132661	0.336025	0.0535328	0.184184	0.0502871
GO_REGULATION_OF_NUCLEOTIDE_CATABOLIC_PROCESS	0.0139389	-0.13628	0.126579	0.0578392	0.337065	-0.053418	2.20166e-06	-0.177943	0.000715423	-0.186754	0.00354462	-0.110158	3.93391e-07	-0.276898	0.000286505	-0.136793
GO_POSITIVE_REGULATION_OF_CARBOHYDRATE_METABOLIC_PROCESS	0.741824	0.0183431	1.2718e-08	0.213113	0.11338	0.0879877	0.678891	-0.0156852	0.458551	-0.0412578	0.000756661	0.127107	5.49014e-05	-0.221812	0.970407	-0.0014057
GO_WNT_SIGNALING_PATHWAY	0.14691	-0.0806408	0.392613	-0.0323843	0.0694821	-0.100825	0.000297112	-0.136442	0.00610551	-0.151805	0.0733286	-0.0677769	8.7399e-06	-0.243838	0.000159604	-0.142334
GO_REGULATION_OF_NEUROTRANSMITTER_LEVELS	2.46828e-12	-0.375693	2.92792e-21	-0.34742	2.30031e-14	-0.406524	6.82912e-31	-0.417718	2.70994e-15	-0.419627	6.50416e-34	-0.436694	2.7338e-08	-0.302211	1.49542e-17	-0.314864
GO_POSITIVE_REGULATION_OF_STRESS_ACTIVATED_PROTEIN_KINASE_SIGNALING_CASCADE	4.90766e-11	0.354124	5.38408e-46	0.502492	4.8346e-16	0.429787	7.0175e-15	0.288651	2.44796e-16	0.433706	1.75072e-35	0.4461	7.16237e-05	0.218438	1.51201e-14	0.285182
GO_PEPTIDYL_ARGININE_MODIFICATION	0.0119977	0.13921	0.44232	0.029105	0.259411	0.0627383	9.95182e-05	0.146666	0.374986	0.0493717	3.48062e-05	0.155891	0.233112	0.066324	2.38949e-05	0.15907
GO_SPECIFICATION_OF_ORGAN_IDENTITY	0.00713103	-0.148991	1.56624e-13	-0.274309	0.00163287	-0.174064	8.43576e-14	-0.277234	0.00165269	-0.173872	1.15305e-14	-0.286413	0.0322228	-0.118833	0.209505	-0.047524
GO_REGULATION_OF_CELLULAR_AMINE_METABOLIC_PROCESS	2.12085e-08	0.304498	0.000643653	0.128766	1.46457e-06	0.263426	1.32562e-27	0.395586	9.68739e-09	0.311435	3.43846e-22	0.355014	0.00500093	0.155355	7.40728e-09	0.216463
GO_RRNA_TRANSCRIPTION	0.397322	-0.047106	0.000166728	-0.141928	0.634307	-0.026483	0.146698	-0.0549498	0.398086	-0.0470299	0.011867	-0.095121	0.392686	-0.0475698	0.144418	-0.0552614
GO_POSITIVE_REGULATION_OF_LIPID_TRANSPORT	0.000127038	0.210984	1.75875e-13	0.273757	0.000234958	0.202685	3.43617e-09	0.221132	0.000479639	0.19262	8.96625e-14	0.276947	0.444454	0.0425623	3.04314e-05	0.157033
GO_ANATOMICAL_STRUCTURE_ARRANGEMENT	0.000151069	0.208678	0.00106334	0.123551	2.36526e-05	0.23217	0.000971711	0.124501	4.35487e-05	0.22471	1.9597e-07	0.195252	0.422028	0.0446872	0.803684	-0.0094189
GO_EPITHELIAL_TO_MESENCHYMAL_TRANSITION	2.56059e-07	0.281146	2.30582e-10	0.236786	1.14295e-07	0.28894	1.77805e-14	0.284444	4.45364e-09	0.318142	1.75979e-21	0.349244	0.319672	0.055371	6.78335e-06	0.169293
GO_PATHWAY_RESTRICTED_SMAD_PROTEIN_PHOSPHORYLATION	7.35193e-08	0.293106	2.13495e-33	0.433536	2.10712e-12	0.376791	2.64091e-12	0.260484	7.24944e-07	0.270724	3.12785e-25	0.378505	0.662399	-0.0243085	5.90365e-08	0.203286
GO_SINGLE_ORGANISM_MEMBRANE_BUDDING	2.3314e-11	0.359647	3.45435e-05	0.155956	7.43726e-12	0.367923	2.31241e-20	0.33989	1.38209e-06	0.264036	1.02039e-21	0.351183	0.247658	-0.0643079	0.981491	0.000879089
GO_NEGATIVE_REGULATION_OF_MAPK_CASCADE	0.000943359	0.182593	3.43771e-13	0.270541	2.63032e-05	0.23089	6.41444e-08	0.202741	0.000643826	0.188318	1.45362e-17	0.314979	0.245501	-0.0646016	0.0514294	0.0737073
GO_SPONGIOTROPHOBLAST_LAYER_DEVELOPMENT	3.14005e-07	0.279137	9.23436e-13	0.26572	5.48638e-09	0.316358	1.84839e-12	0.262275	1.54903e-05	0.237203	5.6945e-21	0.345019	0.176393	0.0751758	0.00917606	0.0984828
GO_NEGATIVE_REGULATION_OF_NERVOUS_SYSTEM_DEVELOPMENT	1.60675e-13	-0.394095	6.75073e-09	-0.217033	1.1021e-11	-0.365101	1.39703e-31	-0.422155	2.92382e-13	-0.39016	5.42938e-27	-0.391273	3.35532e-07	-0.27848	1.02428e-16	-0.306946
GO_HISTONE_H2A_MONOUBIQUITINATION	4.47323e-05	-0.224376	5.18191e-11	-0.244979	3.93014e-06	-0.2528	1.86621e-13	-0.273474	2.4415e-08	-0.303232	9.71185e-16	-0.297374	0.000110184	-0.212859	3.00165e-21	-0.347331
GO_REGULATION_OF_EXTRACELLULAR_MATRIX_ORGANIZATION	0.00366479	0.160747	0.00184369	0.117596	0.00111276	0.180065	0.388362	-0.032676	0.0114596	0.140096	0.201171	0.0484052	0.687075	-0.0224285	0.00501178	0.106033
GO_CELL_DIFFERENTIATION_IN_SPINAL_CORD	3.97406e-07	-0.276796	1.04809e-13	-0.276212	2.48064e-09	-0.323085	2.70805e-27	-0.393409	8.5341e-08	-0.291706	2.1136e-31	-0.421003	0.0928644	-0.0933722	5.21487e-12	-0.25703
GO_MITOTIC_G2_M_TRANSITION_CHECKPOINT	0.0352789	-0.116822	0.399172	-0.031938	0.0831006	-0.0962755	0.00160526	-0.119119	0.0418115	-0.112977	0.00187987	-0.117381	0.00725963	-0.148664	0.00502029	-0.106013
GO_POSITIVE_REGULATION_OF_INTERLEUKIN_8_SECRETION	1.28922e-26	0.545711	1.34458e-50	0.524214	1.77985e-37	0.630869	8.18596e-66	0.586473	1.9683e-32	0.594429	1.24337e-92	0.671022	1.36647e-09	0.328032	7.64436e-31	0.417401
GO_PYRIMIDINE_NUCLEOBASE_METABOLIC_PROCESS	0.0472461	0.110147	2.76035e-05	0.157858	0.290072	0.0588611	1.14002e-06	0.182815	0.895442	-0.00731801	6.58665e-11	0.243683	0.240454	-0.0652957	0.043459	0.076401
GO_RNA_METHYLATION	0.000499471	-0.192033	0.00154263	-0.119554	0.00015154	-0.208637	0.316453	0.0379448	2.87448e-05	-0.229814	0.354738	-0.0350553	0.00452957	-0.15709	0.0692714	-0.0687536
GO_PURINE_CONTAINING_COMPOUND_SALVAGE	3.44157e-06	0.254257	1.2349e-11	0.25258	2.64618e-06	0.257115	1.89014e-24	0.372653	1.28171e-09	0.328558	1.32519e-27	0.395587	0.0104788	0.14181	2.08528e-09	0.224114
GO_INNER_EAR_RECEPTOR_STEREOCILIUM_ORGANIZATION	0.000868523	-0.183846	2.57993e-05	-0.158427	3.67212e-05	-0.226819	1.96775e-18	-0.32296	0.0126629	-0.138161	5.74786e-16	-0.299638	0.166398	0.0769459	0.110888	-0.0603517
GO_NEGATIVE_REGULATION_OF_CATION_TRANSMEMBRANE_TRANSPORT	0.0877216	0.0948691	0.989742	-0.000487149	0.939311	-0.00423961	0.00384571	0.109199	0.340937	0.052992	0.00733412	0.101335	0.879896	-0.00841384	0.0910147	0.0639733
GO_REGULATION_OF_PHOSPHOLIPID_METABOLIC_PROCESS	4.71899e-06	0.250779	3.80693e-17	0.311049	6.42294e-09	0.315002	5.35356e-10	0.232026	1.41679e-05	0.23825	6.88339e-18	0.31799	0.997703	0.000160322	0.000723244	0.127572
GO_NEGATIVE_REGULATION_OF_CYTOPLASMIC_TRANSPORT	0.898065	-0.00713347	0.02208	-0.0865699	0.959587	-0.00282165	0.0240718	-0.0853261	0.971	-0.00202434	0.190409	-0.0495833	0.0160865	-0.13343	0.0476175	-0.0749482
GO_POSITIVE_REGULATION_OF_CELLULAR_RESPONSE_TO_TRANSFORMING_GROWTH_FACTOR_BETA_STIMULUS	1.24326e-12	0.380422	1.16975e-23	0.366598	4.3748e-19	0.467908	9.50531e-25	0.374903	6.14671e-15	0.414677	4.44694e-35	0.443703	0.0216714	0.127335	1.68906e-06	0.179921
GO_AXON_REGENERATION	5.03272e-09	0.317098	1.56581e-09	0.225805	4.59481e-11	0.354618	1.87021e-05	0.161108	2.35179e-11	0.359583	6.32931e-12	0.256038	0.0271539	0.12256	0.0719911	0.0680939
GO_MICROTUBULE_BASED_PROCESS	0.00265233	-0.166189	0.375707	-0.0335559	0.00205683	-0.170358	6.90871e-07	-0.186438	0.00142418	-0.176225	5.73426e-05	-0.151573	0.000166366	-0.207384	8.12986e-06	-0.16786
GO_CALCIUM_MEDIATED_SIGNALING	0.0201285	0.128868	1.18175e-05	0.164862	0.0421088	0.112814	0.00106277	0.123556	0.0271309	0.122578	7.1631e-08	0.202013	0.287839	-0.0591339	0.0611604	0.070856
GO_LOW_DENSITY_LIPOPROTEIN_PARTICLE_CLEARANCE	3.42093e-06	0.254323	0.000193454	0.140535	8.81794e-10	0.33161	0.00315753	0.111505	2.26283e-06	0.2588	0.000359603	0.134584	0.0374689	0.115471	0.00266912	0.113438
GO_SPERM_MOTILITY	0.370569	0.0498294	0.00355512	0.110123	0.302653	0.0573502	0.363576	-0.0344168	0.0630768	0.103222	0.532317	0.0236588	0.560079	0.0324402	0.00180079	0.117856
GO_NEGATIVE_REGULATION_OF_SEQUENCE_SPECIFIC_DNA_BINDING_TRANSCRIPTION_FACTOR_ACTIVITY	2.34398e-12	0.376052	3.05092e-29	0.406819	1.74919e-20	0.483939	1.39449e-28	0.402345	1.17288e-14	0.410713	5.81682e-43	0.487269	0.00948425	0.1437	4.4504e-15	0.290687
GO_NEGATIVE_REGULATION_OF_PROTEIN_CATABOLIC_PROCESS	0.00883883	-0.145023	0.0290059	-0.0825907	0.0522814	-0.107758	0.0793652	-0.0664024	0.00162177	-0.174172	0.0808245	-0.0660829	3.56455e-05	-0.227185	0.000306605	-0.136137
GO_CELLULAR_AMINO_ACID_METABOLIC_PROCESS	0.017434	-0.131808	0.22235	-0.0462142	0.00311659	-0.163495	0.0156369	0.0914022	0.00043137	-0.194147	0.21741	0.0467113	0.0273582	-0.122398	0.109236	0.0606323
GO_POSITIVE_REGULATION_OF_DNA_BINDING	0.00501637	0.155301	2.94416e-08	0.207799	0.0246764	0.124604	2.86215e-15	0.292644	3.38875e-05	0.227805	1.12078e-16	0.30657	0.00265728	0.166158	4.91667e-13	0.268806
GO_NUCLEOTIDE_TRANSPORT	0.0417859	0.112991	6.99218e-08	0.202173	0.603599	0.0289072	1.91865e-22	0.357048	0.398111	0.0470275	1.09857e-22	0.358977	0.425926	-0.0443133	4.18522e-07	0.189993
GO_REGULATION_OF_HAIR_FOLLICLE_DEVELOPMENT	5.96047e-13	0.385409	3.30652e-13	0.270729	3.41033e-13	0.38914	6.74094e-20	0.335909	3.29675e-17	0.444965	3.29853e-28	0.399779	1.65736e-08	0.3067	4.58912e-09	0.219386
GO_CRISTAE_FORMATION	0.601967	-0.0290375	0.00185603	-0.117522	0.127945	-0.0846141	0.0297639	0.0822066	0.917912	-0.00573906	0.816593	-0.00878791	0.0109345	0.140997	0.106045	0.0611837
GO_SYNAPTIC_VESICLE_RECYCLING	3.35327e-07	-0.278486	5.56288e-10	-0.231806	4.09119e-09	-0.318864	1.52079e-20	-0.341434	4.516e-07	-0.275517	1.48958e-19	-0.332921	0.000702096	-0.187034	5.16523e-08	-0.204161
GO_POSITIVE_REGULATION_OF_NUCLEOSIDE_METABOLIC_PROCESS	0.0095655	-0.143539	1.25945e-09	0.227082	0.0344759	-0.117336	0.498681	-0.0256318	0.000994095	-0.181794	0.00742478	0.101181	3.58675e-05	-0.227108	0.228328	0.045623
GO_DORSAL_VENTRAL_PATTERN_FORMATION	9.3089e-11	-0.349288	1.58406e-06	-0.180396	4.76359e-14	-0.40193	2.00719e-19	-0.331789	3.41454e-09	-0.320397	6.99261e-17	-0.308536	0.0124972	-0.138418	2.97417e-05	-0.157228
GO_REGULATION_OF_VITAMIN_METABOLIC_PROCESS	7.96631e-17	0.440062	1.40674e-28	0.402319	1.18403e-18	0.462774	1.33313e-46	0.505444	1.00555e-15	0.425512	7.28428e-64	0.579198	0.00567285	0.153121	3.62605e-23	0.362775
GO_AEROBIC_RESPIRATION	0.000432009	-0.194126	1.72561e-11	-0.250829	1.73039e-06	-0.261663	0.891945	-0.00514726	1.78283e-08	-0.30605	0.00303876	-0.111949	0.000619333	-0.18889	0.020137	-0.0878808
GO_CELLULAR_RESPONSE_TO_INSULIN_STIMULUS	0.680314	-0.0229409	0.137672	-0.0562058	0.902861	-0.00679612	4.62584e-05	-0.153445	0.0353458	-0.11678	0.00365164	-0.109809	9.02939e-08	-0.291174	4.21279e-10	-0.23339
GO_SEQUESTERING_OF_METAL_ION	8.11304e-23	0.508952	8.43089e-20	0.33507	1.09544e-25	0.537125	5.69973e-38	0.460425	5.96925e-32	0.590688	6.29565e-47	0.507019	1.20167e-08	0.309545	1.28528e-09	0.226963
GO_COPPER_ION_TRANSPORT	1.97475e-15	0.421518	4.68796e-06	0.17218	2.75822e-21	0.492771	6.49461e-18	0.318223	4.61799e-20	0.479193	3.53712e-14	0.281285	0.000177584	0.206504	0.0012437	0.121882
GO_MEMBRANE_ASSEMBLY	1.7644e-08	-0.306143	0.00786005	-0.100461	8.34757e-07	-0.269277	1.52776e-10	-0.239075	4.44924e-10	-0.337108	1.99955e-08	-0.210266	5.21945e-11	-0.353663	1.4203e-13	-0.274773
GO_REGULATION_OF_DNA_DAMAGE_RESPONSE_SIGNAL_TRANSDUCTION_BY_P53_CLASS_MEDIATOR	5.31502e-15	0.415561	2.58184e-14	0.282736	1.36922e-19	0.47379	1.85938e-26	0.387455	4.79911e-15	0.416181	2.21796e-32	0.427218	0.214508	0.0690368	2.3931e-07	0.193882
GO_LIPID_DIGESTION	0.089378	0.0943795	0.190493	0.0495738	0.33587	0.05355	0.00616664	0.103497	0.0169186	0.132415	1.85786e-05	0.161163	0.206093	0.0703193	4.44299e-06	0.172596
GO_POSITIVE_REGULATION_OF_CELLULAR_COMPONENT_ORGANIZATION	0.141256	0.0817819	0.0158503	0.0912162	0.0746237	0.0990287	0.377475	-0.0334319	0.53924	0.0341783	0.064737	0.0699022	0.00686314	-0.149689	0.0340101	-0.0801983
GO_POSITIVE_REGULATION_OF_G1_S_TRANSITION_OF_MITOTIC_CELL_CYCLE	0.411249	-0.045732	0.430057	0.0298931	0.830879	-0.0118923	0.012099	-0.094864	0.0364099	-0.116116	0.235156	-0.0449611	1.59264e-05	-0.236876	7.25883e-06	-0.168758
GO_POSITIVE_REGULATION_OF_GENE_EXPRESSION	0.00614359	0.151693	8.46674e-09	0.21564	0.00034676	0.197256	0.307261	0.038672	0.0231373	0.125964	0.000157482	0.142459	0.34898	-0.052117	0.966711	0.00158133
GO_NEUROMUSCULAR_PROCESS_CONTROLLING_BALANCE	7.90679e-15	-0.413138	3.3607e-15	-0.291934	5.14041e-14	-0.401445	6.20645e-42	-0.481931	3.22474e-19	-0.469463	1.20502e-40	-0.475107	7.17438e-12	-0.36818	5.84517e-18	-0.318645
GO_ORGAN_OR_TISSUE_SPECIFIC_IMMUNE_RESPONSE	3.64314e-14	0.40363	1.76993e-34	0.440115	9.20453e-16	0.426032	1.18755e-43	0.4908	3.41884e-17	0.444765	3.66652e-61	0.568802	4.18135e-07	0.276288	8.54435e-29	0.403794
GO_REGULATION_OF_CARDIAC_MUSCLE_CONTRACTION_BY_REGULATION_OF_THE_RELEASE_OF_SEQUESTERED_CALCIUM_ION	0.283939	-0.0596137	0.199956	-0.0485358	0.0256776	-0.123757	0.0839309	-0.0654181	0.111556	-0.0884336	0.386381	-0.0328125	0.0718521	-0.0999839	0.281766	-0.0407677
GO_NEGATIVE_REGULATION_OF_ORGANELLE_ASSEMBLY	0.000183838	-0.206035	0.762198	-0.0114653	0.000894746	-0.183396	1.2292e-05	-0.164543	0.000362037	-0.196646	8.35014e-05	-0.148245	0.081037	-0.096924	0.764111	0.0113703
GO_RESPONSE_TO_INTERFERON_BETA	2.53768e-21	0.493164	8.80873e-35	0.441933	3.53369e-29	0.568175	1.7585e-59	0.562142	5.26071e-32	0.591117	2.61714e-68	0.595525	5.57674e-13	0.385856	1.76783e-32	0.427836
GO_REGULATION_OF_ORGAN_FORMATION	0.00097974	0.182016	0.0048795	0.106357	0.000112749	0.212557	4.76295e-05	0.153192	1.5906e-05	0.236892	1.32871e-05	0.163911	0.179646	0.0746159	0.101404	0.0620094
GO_FOREBRAIN_DEVELOPMENT	2.82696e-18	-0.458215	1.93838e-16	-0.304268	8.21273e-19	-0.46467	2.13179e-36	-0.451446	6.38079e-23	-0.510023	2.65008e-35	-0.445036	1.8813e-13	-0.393063	1.45625e-29	-0.408973
GO_RHODOPSIN_MEDIATED_SIGNALING_PATHWAY	0.9151	-0.00593634	0.979965	0.000951541	0.470469	-0.0401722	0.532774	0.0236324	0.789228	0.0148844	0.678814	0.0156891	0.010114	0.142484	0.173419	0.0515471
GO_ACTIVATION_OF_CYSTEINE_TYPE_ENDOPEPTIDASE_ACTIVITY	6.85516e-26	0.539027	1.88335e-36	0.451758	9.61758e-32	0.589065	1.89394e-64	0.581401	6.81122e-30	0.57415	1.74425e-76	0.623304	1.79701e-08	0.30598	2.94296e-21	0.347402
GO_REGULATION_OF_MESONEPHROS_DEVELOPMENT	0.86019	-0.0098076	0.813221	-0.00895251	0.238417	-0.0655788	0.565046	-0.0217986	0.619398	0.0276534	0.775057	0.0108278	0.046905	0.110316	0.127985	0.0576262
GO_CARBOHYDRATE_DERIVATIVE_METABOLIC_PROCESS	1.11211e-19	0.474831	3.99137e-10	0.233697	1.01088e-24	0.52794	3.83155e-38	0.461393	3.68003e-20	0.480309	1.29396e-34	0.440932	0.00024976	0.201842	9.9632e-14	0.276451
GO_REGULATION_OF_CHROMATIN_BINDING	5.31066e-06	-0.249464	0.00138149	-0.120751	5.21322e-05	-0.222462	3.05714e-15	-0.292353	9.2475e-08	-0.290948	9.92605e-12	-0.253715	9.38468e-06	-0.243023	5.33643e-08	-0.203948
GO_STEM_CELL_PROLIFERATION	0.710225	-0.0206876	3.07579e-06	0.175417	0.346089	-0.05243	0.300038	-0.0392535	0.379855	-0.0488709	0.14484	0.0552034	0.027761	-0.122083	0.629809	-0.0182619
GO_NAD_METABOLIC_PROCESS	2.27906e-07	0.282286	0.00676702	0.102344	4.50216e-08	0.297659	3.03834e-17	0.311975	3.04536e-05	0.229111	1.55881e-15	0.295314	0.787504	-0.0150091	3.58291e-08	0.206536
GO_REGULATION_OF_EXTRACELLULAR_MATRIX_ASSEMBLY	0.0265219	-0.123065	0.511399	-0.0248779	0.0605895	-0.104206	6.83046e-17	-0.308633	0.019136	-0.129909	6.11407e-09	-0.217639	0.00238595	-0.167936	0.0180478	-0.0894196
GO_PROTEIN_LOCALIZATION_TO_LYSOSOME	0.025325	-0.124052	0.393723	0.0323085	0.612356	-0.0282105	0.025382	-0.0845557	0.0443217	-0.111633	0.149078	-0.0546286	0.000703581	-0.187002	0.00613375	-0.103563
GO_MRNA_MODIFICATION	0.151087	-0.0798188	0.257626	0.042874	0.14765	-0.0804939	0.90197	0.00466715	0.13427	-0.0832414	0.83792	0.00775072	0.815407	-0.0129994	0.00904901	-0.0986623
GO_SOMATIC_DIVERSIFICATION_OF_IMMUNOGLOBULINS	0.00224118	0.168961	0.0242934	0.0851933	0.00706674	0.149157	3.57102e-06	0.174277	0.034575	0.117272	2.95777e-05	0.157274	0.49781	-0.0377373	0.761732	0.0114885
GO_ERBB2_SIGNALING_PATHWAY	0.0003313	-0.1979	0.000214274	-0.13957	1.8966e-06	-0.260688	1.03459e-12	-0.265159	1.07383e-08	-0.310533	2.30148e-07	-0.19415	2.22284e-09	-0.324002	4.79883e-10	-0.23265
GO_AMEBOIDAL_TYPE_CELL_MIGRATION	2.37367e-06	0.258286	1.01586e-11	0.253595	2.31443e-08	0.303713	7.01354e-05	0.149798	6.66271e-07	0.271585	3.6226e-11	0.2469	0.609076	-0.0284709	0.0750822	0.0673684
GO_HEMATOPOIETIC_STEM_CELL_DIFFERENTIATION	1.4517e-06	0.263519	6.01053e-09	0.217744	5.70766e-09	0.316018	8.0498e-06	0.167939	9.57042e-11	0.349076	6.37151e-10	0.231029	1.37583e-05	0.238594	0.00168824	0.118567
GO_SPINAL_CORD_MOTOR_NEURON_DIFFERENTIATION	0.000269642	-0.200781	3.33421e-10	-0.234714	1.319e-06	-0.264526	3.02581e-27	-0.393069	9.27963e-05	-0.215101	9.36178e-28	-0.39664	0.194552	-0.0721415	4.98799e-10	-0.232429
GO_MONOCARBOXYLIC_ACID_METABOLIC_PROCESS	0.00194188	0.171288	1.46765e-05	0.163101	0.00502558	0.155268	4.89204e-07	0.188894	0.137159	0.082631	7.68083e-08	0.201552	0.97291	0.00189097	6.64634e-06	0.169453
GO_CELLULAR_RESPONSE_TO_TOPOLOGICALLY_INCORRECT_PROTEIN	2.5094e-15	0.420087	2.96812e-12	0.259894	2.24469e-16	0.434202	6.75303e-29	0.404488	2.05902e-15	0.421269	1.10435e-31	0.422806	0.0535891	0.107169	0.000101309	0.146504
GO_AMINOGLYCAN_BIOSYNTHETIC_PROCESS	3.64575e-15	0.417843	9.2678e-12	0.254071	6.26735e-16	0.428279	1.99421e-16	0.304148	2.10541e-15	0.421136	1.01859e-25	0.382096	0.182534	0.074125	7.71033e-07	0.18565
GO_DICARBOXYLIC_ACID_METABOLIC_PROCESS	0.00276744	-0.165483	3.08281e-05	-0.156924	0.00275213	-0.165576	0.0177817	-0.0896266	9.30876e-05	-0.21506	0.000839801	-0.126027	0.00114584	-0.179613	0.0287322	-0.0827315
GO_NEGATIVE_REGULATION_OF_ASTROCYTE_DIFFERENTIATION	9.20181e-19	-0.464082	7.66531e-24	-0.368014	9.56035e-23	-0.508218	4.83795e-52	-0.530717	1.01719e-20	-0.486558	3.16057e-57	-0.552966	1.69328e-07	-0.285172	1.22126e-22	-0.358612
GO_POSITIVE_REGULATION_OF_PROTEASOMAL_PROTEIN_CATABOLIC_PROCESS	0.000115728	0.212214	0.0133592	0.0935392	4.71137e-05	0.223729	1.84775e-15	0.29457	0.00293184	0.16452	2.4908e-13	0.272092	0.218472	-0.0684451	0.0567462	0.0720988
GO_REGULATION_OF_ENERGY_HOMEOSTASIS	0.170077	-0.0762855	0.0101866	0.0971287	0.296199	-0.05812	0.298305	-0.0393945	0.399619	-0.0468775	0.310976	0.0383764	0.00909501	-0.144488	0.856491	-0.00685228
GO_REGULATION_OF_MEMBRANE_POTENTIAL	3.16787e-09	-0.32103	1.19521e-18	-0.324913	1.89989e-09	-0.325309	4.64818e-29	-0.405586	8.10073e-11	-0.350345	1.5289e-30	-0.41544	5.92432e-08	-0.29512	1.66204e-18	-0.323623
GO_POSITIVE_REGULATION_OF_RELEASE_OF_CYTOCHROME_C_FROM_MITOCHONDRIA	7.47249e-09	0.313694	0.0550047	0.0726113	3.2893e-11	0.357106	2.10798e-13	0.272892	1.68039e-11	0.362043	3.99504e-10	0.233692	0.000146651	0.209075	0.000115409	0.14532
GO_PEPTIDYL_PROLINE_HYDROXYLATION	5.03954e-17	0.442617	1.75637e-14	0.2845	4.57895e-23	0.511497	2.19973e-41	0.479038	1.27551e-21	0.496384	2.92622e-43	0.488801	9.26459e-06	0.243171	1.09386e-20	0.342641
GO_MULTICELLULAR_ORGANISMAL_RESPONSE_TO_STRESS	0.0865463	-0.0952211	8.85451e-07	-0.184652	0.0156396	-0.133994	6.05211e-08	-0.203123	0.0291263	-0.121044	5.10443e-07	-0.188593	0.00267909	-0.166023	1.50287e-10	-0.239166
GO_NEGATIVE_REGULATION_OF_SMALL_GTPASE_MEDIATED_SIGNAL_TRANSDUCTION	0.285919	0.0593695	0.35593	0.0349686	0.0115243	0.139987	6.69475e-07	-0.186663	0.258259	0.06289	0.0179094	-0.0895269	0.116417	-0.0872575	3.61517e-07	-0.19102
GO_ESTABLISHMENT_OF_LOCALIZATION_BY_MOVEMENT_ALONG_MICROTUBULE	1.53395e-07	-0.286124	7.85178e-07	-0.185519	9.878e-09	-0.311264	6.43885e-19	-0.327317	7.46069e-10	-0.332964	6.13437e-17	-0.309079	1.377e-05	-0.238584	4.67232e-17	-0.310205
GO_AMINO_ACID_BETAINE_TRANSPORT	0.162304	0.0776941	0.816081	-0.0088129	0.0176341	0.131576	8.14473e-06	-0.167845	0.660907	0.0244231	0.00192508	-0.117117	0.131801	-0.0837711	0.0765613	-0.0670299
GO_AMMONIUM_TRANSMEMBRANE_TRANSPORT	0.174018	0.0755897	0.686173	-0.0153093	0.0833223	0.0962066	0.000456696	-0.132223	0.921167	-0.00551072	0.0163367	-0.0908006	0.558496	-0.0325711	0.967726	0.00153312
GO_REGULATION_OF_GROWTH	0.00271824	0.165782	0.765815	0.0112857	0.000442066	0.193796	0.132189	-0.0569998	0.0457747	0.110885	0.520021	0.0243723	0.0103736	-0.142002	0.000339038	-0.135159
GO_CATION_TRANSPORT	0.724072	-0.019656	0.00780682	-0.100547	0.444968	-0.0425143	0.015857	-0.0912105	0.0730942	-0.0995522	0.0106377	-0.0965625	0.00210226	-0.170004	8.37662e-05	-0.148216
GO_GABAERGIC_NEURON_DIFFERENTIATION	0.00010021	-0.214101	8.27069e-24	-0.36776	2.86512e-05	-0.229854	8.98573e-13	-0.265854	1.26946e-06	-0.264927	2.76491e-18	-0.321619	0.191485	-0.072639	1.66609e-06	-0.180022
GO_MACROAUTOPHAGY	0.0232658	0.125848	0.374824	0.033618	0.0250716	0.124266	1.35063e-08	0.212737	0.504843	0.0371227	1.83944e-07	0.195685	0.00954866	-0.143573	0.0364501	0.0791393
GO_FATTY_ACID_BETA_OXIDATION_USING_ACYL_COA_DEHYDROGENASE	0.818029	0.0128114	0.803658	-0.00942016	0.796919	-0.014329	0.000547408	-0.130408	0.257727	-0.0629602	0.00677446	-0.10233	0.0270048	-0.122678	0.0161531	0.0909562
GO_MEMBRANE_DOCKING	0.0554375	-0.106357	0.644978	0.0174571	0.308773	-0.0566302	0.143679	-0.0553632	0.0554176	-0.106366	0.558426	-0.0221705	0.0351292	-0.116917	0.00057893	-0.129843
GO_EXCITATORY_POSTSYNAPTIC_POTENTIAL	1.79229e-10	-0.344251	2.36546e-14	-0.283138	2.70941e-11	-0.358541	1.38181e-35	-0.446706	4.7635e-14	-0.40193	4.40501e-34	-0.437723	1.85678e-06	-0.260914	1.79663e-17	-0.314119
GO_GLUTAMINE_FAMILY_AMINO_ACID_METABOLIC_PROCESS	0.0446997	-0.111437	6.13057e-06	-0.170088	0.000844221	-0.184274	2.47211e-06	-0.177071	0.000206141	-0.204478	2.10802e-05	-0.160116	0.000260532	-0.201258	0.0464706	-0.0753379
GO_REGULATION_OF_NUCLEASE_ACTIVITY	6.46046e-12	0.368926	2.18426e-22	0.356597	5.11849e-14	0.401473	1.99883e-32	0.427502	2.0215e-13	0.392592	5.44667e-35	0.443179	0.00212241	0.169849	5.10486e-05	0.152589
GO_RESPONSE_TO_INORGANIC_SUBSTANCE	5.13915e-11	0.353779	4.18763e-15	0.290957	1.10854e-13	0.396509	8.97626e-27	0.38972	1.88151e-11	0.361218	5.09994e-32	0.424938	0.0200562	0.128942	3.14167e-08	0.207382
GO_NEGATIVE_REGULATION_OF_HISTONE_ACETYLATION	0.71297	0.0204826	0.573409	-0.0213318	0.638989	0.0261179	0.185394	-0.0501489	0.819327	0.0127184	0.220075	-0.0464421	0.648292	0.0253957	0.75381	0.011883
GO_PHAGOLYSOSOME_ASSEMBLY	7.82452e-09	0.313294	1.18414e-31	0.422613	4.98463e-12	0.370766	3.39224e-25	0.378244	1.0392e-12	0.381646	2.4813e-40	0.473421	3.32033e-06	0.254649	1.84433e-10	0.238031
GO_MODULATION_BY_SYMBIONT_OF_HOST_CELLULAR_PROCESS	8.80659e-15	0.412477	6.17505e-41	0.476658	2.25111e-20	0.482713	2.12413e-34	0.439638	2.34036e-13	0.391629	3.00826e-57	0.553054	0.0237107	0.125449	1.34023e-09	0.226718
GO_REGULATION_OF_VESICLE_MEDIATED_TRANSPORT	0.0712958	0.100179	9.70959e-07	0.183984	0.00248659	0.167256	0.761919	0.0114792	0.115833	0.0873968	0.00137373	0.120812	0.0260048	-0.123487	0.824217	-0.00841642
GO_ORGANONITROGEN_COMPOUND_CATABOLIC_PROCESS	8.95951e-11	0.349579	6.1685e-12	0.25617	6.72403e-13	0.384597	1.767e-20	0.340882	1.72852e-09	0.326093	1.23346e-20	0.342202	0.0298111	0.120538	2.36541e-13	0.27234
GO_REGULATION_OF_ASTROCYTE_DIFFERENTIATION	4.55725e-09	-0.317945	1.57313e-15	-0.295274	1.63091e-12	-0.37856	7.35987e-38	-0.4598	1.68981e-12	-0.378316	2.22183e-33	-0.43343	0.00527031	-0.154429	3.12181e-13	-0.271006
GO_REGULATION_OF_HYDROGEN_PEROXIDE_INDUCED_CELL_DEATH	0.0978237	0.0919901	0.0186399	0.0889683	0.0140787	0.136083	1.68508e-06	0.179938	0.21696	0.0686699	1.2434e-06	0.18218	0.112382	0.088231	4.64195e-06	0.172257
GO_ADP_METABOLIC_PROCESS	0.000201269	0.204804	0.00672635	0.102419	0.000525189	0.191304	1.28699e-10	0.240022	0.0155412	0.13412	1.04434e-11	0.253452	0.248814	-0.0641512	7.03555e-06	0.169005
GO_POSITIVE_REGULATION_OF_CELL_PROLIFERATION	9.58301e-21	0.486845	2.41336e-51	0.527591	5.16017e-30	0.575145	2.05755e-51	0.527903	5.98029e-26	0.539579	2.72349e-81	0.638421	1.01525e-06	0.267255	5.04355e-20	0.336994
GO_REGULATION_OF_SODIUM_ION_TRANSPORT	0.0101058	-0.142499	0.217682	0.0466837	0.0274336	-0.122339	0.00026011	-0.137723	0.101677	-0.0909542	0.0398355	-0.0777657	0.474546	-0.0398044	0.604693	-0.019613
GO_POSITIVE_REGULATION_OF_TUMOR_NECROSIS_FACTOR_SUPERFAMILY_CYTOKINE_PRODUCTION	3.69245e-33	0.599979	2.66051e-82	0.641494	3.29639e-51	0.710409	4.10281e-73	0.612181	2.14112e-50	0.706348	4.41528e-115	0.725222	4.16018e-16	0.430656	3.55066e-43	0.48837
GO_NEGATIVE_REGULATION_OF_G_PROTEIN_COUPLED_RECEPTOR_PROTEIN_SIGNALING_PATHWAY	4.07976e-08	0.298564	0.00559038	0.104704	9.63305e-09	0.311484	0.00973971	0.0977121	5.95729e-09	0.31565	6.27618e-05	0.15078	0.00534275	0.154187	0.0647482	0.0698993
GO_HISTONE_DEUBIQUITINATION	2.38578e-08	-0.30344	2.4298e-09	-0.223205	9.83919e-07	-0.26758	3.71504e-23	-0.362692	8.81931e-11	-0.349699	5.39718e-23	-0.361418	5.39263e-08	-0.295993	2.05559e-18	-0.322788
GO_GLUCOSAMINE_CONTAINING_COMPOUND_METABOLIC_PROCESS	3.08952e-13	0.389795	1.06106e-17	0.316251	5.85129e-22	0.499992	1.13445e-31	0.422732	1.23435e-14	0.410397	3.87537e-33	0.43194	0.00351532	0.161457	9.17358e-10	0.228927
GO_ORGANIC_ACID_TRANSPORT	0.723319	-0.0197119	0.309607	-0.0384851	0.337013	-0.0534236	0.000390676	-0.13377	0.0440355	-0.111783	0.00641354	-0.103011	0.00862628	-0.145478	0.000861453	-0.125762
GO_FOREBRAIN_REGIONALIZATION	5.18802e-13	-0.38634	4.18394e-32	-0.425481	2.59619e-19	-0.470564	8.27944e-39	-0.465101	2.38678e-18	-0.459107	2.32801e-44	-0.494378	2.66574e-05	-0.230728	1.92548e-15	-0.294389
GO_FOREBRAIN_GENERATION_OF_NEURONS	1.95908e-06	-0.260343	1.16516e-09	-0.227536	6.81267e-07	-0.271358	7.95426e-19	-0.326498	4.79737e-09	-0.317507	9.00327e-18	-0.316913	0.00563054	-0.153254	8.52421e-09	-0.215598
GO_CALCIUM_DEPENDENT_CELL_CELL_ADHESION_VIA_PLASMA_MEMBRANE_CELL_ADHESION_MOLECULES	1.19622e-08	-0.309585	2.59766e-12	-0.260567	9.37886e-11	-0.349231	6.61362e-27	-0.390665	2.65725e-13	-0.390792	1.17586e-27	-0.39595	7.68269e-08	-0.292693	8.81685e-18	-0.316997
GO_PANCREAS_DEVELOPMENT	0.260588	0.0625839	0.000833854	0.126101	0.434728	0.0434762	0.969972	-0.00142636	0.198969	0.0714351	0.0635225	0.0702211	0.618202	-0.0277479	0.31706	-0.0378973
GO_LEUKOCYTE_CHEMOTAXIS	3.29599e-30	0.576746	2.3948e-64	0.581018	1.60292e-43	0.668965	7.61592e-81	0.637052	4.95311e-40	0.647644	3.64793e-122	0.739996	9.29368e-12	0.366327	1.05887e-33	0.435404
GO_GLUCOSE_6_PHOSPHATE_METABOLIC_PROCESS	1.13023e-19	0.47475	2.61977e-22	0.355964	5.16069e-25	0.530749	1.74898e-45	0.499977	6.55323e-18	0.453744	3.05494e-50	0.522586	4.87083e-05	0.223314	6.20421e-12	0.25614
GO_MITOCHONDRIAL_TRANSMEMBRANE_TRANSPORT	0.0661395	-0.102052	2.84209e-08	-0.208025	0.000197702	-0.205048	0.0184151	0.0891382	0.00587483	-0.152495	0.416947	-0.0307502	0.265325	-0.061967	0.866549	0.00636732
GO_NUCLEAR_PORE_ORGANIZATION	0.0360571	-0.116334	0.797439	0.00972507	0.0074589	-0.148168	0.214954	-0.0469614	5.36277e-05	-0.222107	0.846656	-0.00732759	8.05974e-06	-0.244762	4.81549e-07	-0.189005
GO_CELLULAR_RESPONSE_TO_NITRIC_OXIDE	0.0136103	0.136749	0.000305543	0.136171	0.00694238	0.14948	1.94378e-07	0.195308	0.173509	0.0756789	1.9794e-08	0.21033	0.501296	0.0374321	1.53328e-05	0.162743
GO_INTRA_S_DNA_DAMAGE_CHECKPOINT	0.25312	0.0635722	4.75275e-07	0.189098	0.758218	0.0171397	0.000202063	0.140125	0.0619617	0.103659	7.95624e-06	0.168031	0.571233	0.0315228	0.851069	0.00711417
GO_REGULATION_OF_SYNAPSE_STRUCTURE_OR_ACTIVITY	1.30079e-17	-0.45005	8.65456e-27	-0.389833	1.17717e-19	-0.474547	5.48396e-43	-0.487401	1.01246e-22	-0.507961	3.05222e-45	-0.498782	1.08335e-12	-0.381363	8.15928e-29	-0.40393
GO_HISTONE_H3_K9_MODIFICATION	8.7309e-12	-0.366775	3.14177e-12	-0.259607	6.12916e-10	-0.334547	3.48968e-30	-0.413088	9.91857e-15	-0.411746	6.5317e-33	-0.430535	5.4613e-08	-0.295875	3.86397e-13	-0.269976
GO_RESPONSE_TO_INTERFERON_ALPHA	1.83855e-17	0.448168	2.4688e-47	0.508973	5.54718e-33	0.598639	4.80014e-35	0.443505	1.19372e-20	0.485787	3.07674e-49	0.517959	4.39943e-07	0.275779	2.76253e-13	0.271595
GO_NEGATIVE_REGULATION_OF_TRANSLATIONAL_INITIATION	0.000397493	-0.195318	0.000220809	-0.139285	0.00368789	-0.16064	0.159211	-0.0533028	0.00030947	-0.198858	0.0100146	-0.0973505	0.000558211	-0.190414	0.00010526	-0.146158
GO_REGULATION_OF_TOLL_LIKE_RECEPTOR_SIGNALING_PATHWAY	5.66113e-29	0.566442	1.04052e-79	0.633538	2.70986e-44	0.673453	8.20366e-68	0.593748	6.54572e-39	0.640413	9.1148e-110	0.713461	8.15864e-12	0.367261	4.54307e-29	0.405653
GO_CARDIAC_CONDUCTION_SYSTEM_DEVELOPMENT	0.102212	-0.0908129	0.36292	0.0344638	0.0046722	-0.156549	3.94246e-06	0.173517	0.00209466	-0.170062	5.47118e-06	0.170979	0.00574663	-0.15289	0.121667	0.0585983
GO_REGULATION_OF_GLOMERULAR_FILTRATION	2.07724e-18	0.459837	5.34189e-36	0.449125	2.01343e-21	0.494251	4.69659e-38	0.460897	8.87009e-21	0.487216	1.83936e-56	0.549786	1.11963e-07	0.289136	6.18043e-20	0.336234
GO_REGULATION_OF_FATTY_ACID_METABOLIC_PROCESS	0.290793	0.0587734	0.00824119	0.0998594	0.416048	0.0452648	0.0198905	0.0880549	0.384541	-0.0483927	0.000559618	0.130186	0.00114536	-0.179619	0.461484	0.0278979
GO_CYTOCHROME_COMPLEX_ASSEMBLY	0.862866	-0.00961802	3.62164e-06	-0.174169	0.192572	-0.072462	0.000494814	0.131423	0.406598	0.0461877	0.912204	0.00417785	0.197555	0.0716601	0.121171	0.0586762
GO_RESPONSE_TO_METAL_ION	9.50631e-08	0.290688	1.00892e-09	0.228374	1.15495e-09	0.329411	1.44238e-17	0.31501	2.13128e-07	0.28294	5.30776e-21	0.345273	0.1369	0.0826853	6.59007e-06	0.16952
GO_CELL_SUBSTRATE_ADHESION	3.29998e-20	0.480844	2.41143e-48	0.513773	7.56739e-30	0.573771	1.20449e-29	0.409523	2.79889e-24	0.523636	4.05927e-53	0.535474	0.000224382	0.203318	4.96527e-19	0.32832
GO_NEGATIVE_REGULATION_OF_DEVELOPMENTAL_GROWTH	7.30841e-07	-0.270641	7.69835e-08	-0.201537	4.0333e-06	-0.252515	8.98096e-22	-0.351636	8.48945e-08	-0.291755	5.60353e-19	-0.327854	7.12022e-05	-0.218513	2.49924e-10	-0.236335
GO_NEGATIVE_REGULATION_OF_INTRACELLULAR_SIGNAL_TRANSDUCTION	3.27035e-06	0.254814	3.83328e-17	0.31102	9.22522e-09	0.311861	9.62004e-12	0.253878	2.50102e-05	0.231498	4.13905e-21	0.346173	0.24958	-0.0640477	0.0156149	0.0914214
GO_ENDOCARDIAL_CUSHION_FORMATION	0.574656	-0.031243	0.00021484	-0.139545	0.310627	-0.056414	0.00973002	-0.097725	0.433613	-0.0435816	0.00132207	-0.121225	0.00664575	-0.150274	0.00159188	-0.119211
GO_REGULATION_OF_NUCLEAR_CELL_CYCLE_DNA_REPLICATION	3.59069e-07	-0.277807	4.61622e-05	-0.153463	2.59899e-07	-0.281	2.85517e-07	-0.192662	2.01698e-09	-0.324812	1.75195e-08	-0.211102	2.23025e-06	-0.258956	9.5182e-07	-0.184128
GO_ORGANIC_HYDROXY_COMPOUND_TRANSPORT	0.00065853	0.187984	1.19374e-12	0.264451	3.12922e-06	0.255295	6.1684e-06	0.17004	0.000495461	0.19215	3.53597e-11	0.247029	0.132609	0.0835969	1.02296e-09	0.228294
GO_MITOCHONDRIAL_CALCIUM_ION_HOMEOSTASIS	0.976972	0.00160734	0.013316	0.0935828	0.87783	-0.00855974	1.45221e-13	0.274668	0.0669582	-0.101747	9.21091e-10	0.228903	0.216414	-0.0687513	0.000564617	0.130096
GO_REPLACEMENT_OSSIFICATION	0.0754002	0.0987662	0.399734	-0.0319	0.0479471	0.109802	0.00119478	-0.122311	0.0621353	0.10359	0.430924	-0.029837	0.00946486	-0.143739	0.00879001	-0.0990354
GO_REGULATION_OF_ACTIN_FILAMENT_BASED_PROCESS	3.00311e-12	0.374327	2.29957e-27	0.393909	7.61411e-18	0.452939	4.54067e-10	0.232964	7.77362e-14	0.398799	1.07026e-25	0.381938	0.2369	0.0657907	1.7804e-06	0.179529
GO_WOUND_HEALING	7.74218e-26	0.538535	2.87217e-57	0.553137	4.33027e-37	0.628242	4.51546e-46	0.502866	4.07812e-30	0.575987	2.13767e-81	0.638743	6.80923e-06	0.246674	1.23195e-21	0.350514
GO_MITOTIC_CELL_CYCLE_ARREST	0.00647048	0.150758	0.181825	0.0505584	0.0571839	0.10561	0.0241113	0.0853023	3.30676e-05	0.228105	0.0663233	0.0694931	0.00741695	0.148272	0.318958	-0.0377491
GO_HEXOSE_CATABOLIC_PROCESS	4.48799e-07	0.27558	0.0404772	0.0775166	9.13243e-08	0.291067	1.02691e-08	0.214445	0.000511941	0.191675	7.55375e-09	0.216343	0.597127	0.0294249	1.61369e-08	0.21162
GO_GLUTAMINE_METABOLIC_PROCESS	2.22701e-05	-0.232893	2.14398e-11	-0.249686	1.26833e-07	-0.287948	5.42205e-15	-0.289806	1.53337e-10	-0.345459	1.0461e-14	-0.286853	3.95624e-08	-0.298846	2.36259e-10	-0.23665
GO_RESPONSE_TO_NERVE_GROWTH_FACTOR	1.14779e-06	-0.26598	0.675893	-0.0158404	4.47795e-06	-0.25136	3.39152e-15	-0.291893	7.2807e-09	-0.313919	7.98491e-07	-0.185398	8.9029e-10	-0.331533	5.64899e-08	-0.203575
GO_NEGATIVE_REGULATION_OF_TELOMERASE_ACTIVITY	0.738619	0.0185794	0.0407598	0.0774079	0.181538	0.0742937	1.38524e-13	0.274892	0.310522	-0.0564263	5.56441e-08	0.203674	0.280527	-0.060037	0.00872054	0.0991371
GO_RNA_PROCESSING	0.0473116	-0.110114	8.0524e-07	-0.185337	0.0175303	-0.131696	0.0693878	-0.0687249	0.0445749	-0.111501	0.000350578	-0.134832	0.312535	-0.0561923	0.138803	-0.056045
GO_REGULATION_OF_IRE1_MEDIATED_UNFOLDED_PROTEIN_RESPONSE	8.32263e-16	0.426622	3.64016e-16	0.301594	5.67273e-18	0.454516	3.17464e-37	0.4562	2.28147e-16	0.434109	1.42133e-39	0.46931	0.00142917	0.17617	2.57148e-05	0.158454
GO_POSITIVE_REGULATION_OF_FATTY_ACID_BIOSYNTHETIC_PROCESS	1.88244e-10	0.34387	1.10558e-16	0.306627	1.40748e-12	0.379573	6.11309e-28	0.397927	5.07062e-10	0.336065	9.93153e-34	0.435574	0.00156907	0.174696	3.65857e-21	0.346618
GO_SYNAPTIC_VESICLE_CYCLE	3.57352e-11	-0.356491	1.08233e-21	-0.350974	2.50816e-13	-0.391173	2.82502e-29	-0.407044	6.63488e-14	-0.399815	8.99747e-34	-0.435836	7.79388e-07	-0.269982	3.1723e-17	-0.311798
GO_NUCLEOBASE_CONTAINING_SMALL_MOLECULE_METABOLIC_PROCESS	0.00269576	0.16592	0.299425	-0.0393033	0.187772	0.073249	5.80667e-11	0.244365	0.0696597	0.100761	4.58928e-05	0.153514	0.397766	0.0470618	0.000762315	0.12703
GO_POSITIVE_REGULATION_OF_INTERLEUKIN_1_SECRETION	2.36547e-25	0.533975	1.8516e-68	0.596061	7.27465e-38	0.633488	1.95129e-60	0.565944	8.3863e-36	0.619299	4.7063e-90	0.66396	1.41381e-10	0.346085	5.69983e-33	0.430902
GO_REGULATION_OF_CYTOKINE_PRODUCTION_INVOLVED_IN_IMMUNE_RESPONSE	1.91172e-30	0.578679	6.99503e-73	0.6114	7.21369e-45	0.676744	9.63146e-76	0.620894	3.7658e-45	0.678345	2.74744e-114	0.723503	9.42479e-14	0.397558	2.02477e-39	0.468469
GO_POSITIVE_REGULATION_OF_LEUKOCYTE_PROLIFERATION	4.11901e-32	0.591945	5.09335e-79	0.63138	2.23725e-51	0.711242	3.5273e-81	0.638078	8.26439e-50	0.703372	2.08058e-122	0.740487	6.24088e-17	0.441427	9.67609e-41	0.475617
GO_PSEUDOURIDINE_SYNTHESIS	0.479688	0.0393429	0.00277078	-0.113011	0.950123	-0.00348319	0.000101801	0.146461	0.802664	0.013915	0.247888	0.0437622	0.607822	-0.0285707	0.21682	0.0467712
GO_CELLULAR_PROTEIN_COMPLEX_ASSEMBLY	0.982866	-0.0011959	0.000537749	-0.130588	0.264026	-0.0621354	0.000112458	0.145556	0.918817	0.00567556	0.307388	0.0386619	0.407711	-0.0460784	0.0713693	0.0682429
GO_DEFENSE_RESPONSE	5.91102e-34	0.605934	7.14578e-75	0.61804	3.14155e-51	0.710513	7.76086e-89	0.660558	2.54157e-47	0.690325	1.77496e-127	0.750454	6.04086e-13	0.385318	1.55294e-40	0.474516
GO_POLY_A_MRNA_EXPORT_FROM_NUCLEUS	0.0678706	0.10141	0.151913	0.0542509	0.0298365	0.12052	0.9966	0.000161445	0.000152594	0.208544	0.407137	0.0314019	0.000214568	0.203931	0.0121922	0.094762
GO_PHOSPHOLIPID_BIOSYNTHETIC_PROCESS	0.0122765	-0.138764	0.65101	0.0171392	0.0663722	-0.101965	0.00236498	-0.114812	0.00566823	-0.153135	0.162634	-0.0528693	0.00256231	-0.166761	0.00794818	-0.10032
GO_NEGATIVE_REGULATION_OF_LEUKOCYTE_APOPTOTIC_PROCESS	7.11494e-31	0.582154	1.09084e-70	0.603899	1.56628e-49	0.70195	1.9034e-69	0.599561	1.76005e-46	0.685755	4.28935e-102	0.695366	1.65306e-12	0.378467	3.47846e-39	0.467179
GO_POSITIVE_REGULATION_OF_HYDROLASE_ACTIVITY	0.000157844	0.208091	6.37731e-21	0.344608	5.21248e-08	0.296307	0.0191729	0.0885727	2.06896e-05	0.233774	7.20715e-11	0.243194	0.747329	-0.0179381	0.00229407	0.115156
GO_CELLULAR_RESPONSE_TO_INTERLEUKIN_4	2.7423e-26	0.54271	1.09388e-40	0.475332	2.81858e-36	0.622623	7.09095e-62	0.571584	1.73586e-36	0.624088	1.95153e-79	0.632685	2.86187e-08	0.301797	3.94536e-24	0.370224
GO_PORPHYRIN_CONTAINING_COMPOUND_METABOLIC_PROCESS	0.00437445	0.157697	0.504198	-0.0253035	4.56457e-05	0.224124	3.26441e-07	0.191732	0.0291294	0.121042	0.00417413	0.108228	0.0944297	0.0929297	5.14115e-07	0.188542
GO_SPERM_CAPACITATION	0.0132901	0.137217	0.799654	-0.00961641	0.00498496	0.155411	0.184122	0.0502942	0.0102252	0.142276	0.579897	0.0209719	0.867612	0.00928197	0.483018	0.0265744
GO_POSITIVE_REGULATION_OF_TELOMERASE_ACTIVITY	0.678476	-0.0230806	0.00163058	-0.118948	0.461435	-0.0409936	0.185827	0.0500997	0.141435	-0.0817453	0.777791	-0.0106926	0.000195416	-0.205206	0.46894	-0.0274359
GO_NEGATIVE_REGULATION_OF_INTERLEUKIN_6_PRODUCTION	4.60298e-20	0.479209	3.94814e-65	0.583944	6.93395e-35	0.612744	2.74324e-58	0.557322	3.2994e-25	0.532603	3.82152e-90	0.664211	9.55673e-07	0.267882	4.7062e-38	0.460892
GO_CELLULAR_MONOVALENT_INORGANIC_CATION_HOMEOSTASIS	3.19173e-05	0.228538	0.00072583	0.127535	6.60047e-07	0.271681	1.9582e-08	0.210398	1.92159e-05	0.234654	4.21949e-09	0.219894	0.0984367	0.0918232	0.075728	0.0672199
GO_RESPONSE_TO_METHYLMERCURY	0.0564258	0.105932	0.0012398	0.121915	0.233934	0.0662078	4.47075e-09	0.219544	0.994738	0.00036722	8.18904e-09	0.215845	0.403728	-0.0464704	0.00106882	0.123496
GO_REGULATION_OF_CENTRIOLE_REPLICATION	0.170976	0.0761256	4.5469e-06	-0.172417	0.318125	0.055548	2.60376e-05	-0.15835	0.212163	0.0693906	1.12674e-07	-0.198999	0.559636	-0.0324768	1.52811e-05	-0.162771
GO_POSITIVE_REGULATION_OF_MULTICELLULAR_ORGANISMAL_METABOLIC_PROCESS	3.16984e-15	0.418686	1.12313e-09	0.22775	6.51246e-14	0.399934	4.94453e-17	0.309971	1.27799e-19	0.474135	3.86955e-20	0.337982	2.89889e-06	0.256127	1.92008e-08	0.210523
GO_REGULATION_OF_ACUTE_INFLAMMATORY_RESPONSE	9.36334e-27	0.546973	1.68315e-55	0.545741	2.55964e-38	0.636513	7.61891e-78	0.627666	1.14101e-37	0.632173	5.08752e-112	0.718521	6.09718e-11	0.352494	2.60234e-35	0.445083
GO_CYTOKINE_PRODUCTION	3.62071e-33	0.600044	4.99881e-76	0.621822	4.96576e-48	0.694115	9.1806e-67	0.589954	4.83191e-45	0.677732	1.47675e-107	0.70839	9.55135e-11	0.349092	1.22332e-30	0.416072
GO_TOLL_LIKE_RECEPTOR_SIGNALING_PATHWAY	1.15361e-29	0.572251	4.31403e-80	0.634726	2.56539e-52	0.715841	1.44019e-73	0.613708	1.74116e-36	0.624079	6.17282e-117	0.729186	6.03282e-11	0.352574	2.60253e-34	0.439106
GO_POSITIVE_REGULATION_OF_INTRACELLULAR_TRANSPORT	2.53335e-11	0.359036	2.41391e-28	0.400712	5.46002e-15	0.415398	5.62732e-21	0.345062	2.16786e-11	0.360181	2.84427e-40	0.473102	0.490642	0.0383685	1.99249e-09	0.224383
GO_FOREBRAIN_CELL_MIGRATION	2.90964e-09	-0.321747	0.000892763	-0.125389	7.52567e-10	-0.332894	1.34866e-10	-0.239764	1.3442e-11	-0.363665	2.76844e-08	-0.208194	1.51333e-09	-0.327192	2.99478e-13	-0.271206
GO_DEMETHYLATION	3.32298e-05	-0.228046	6.27028e-06	-0.169911	8.58338e-05	-0.216111	8.87375e-18	-0.316971	3.38283e-07	-0.278399	6.4177e-17	-0.308892	0.000243453	-0.202195	1.64919e-11	-0.251067
GO_CELL_MOTILITY	3.80015e-18	0.456649	4.80013e-40	0.471873	1.37473e-24	0.526647	2.02668e-24	0.372424	6.83095e-21	0.488467	9.71742e-47	0.506109	0.0097003	0.143275	1.9397e-10	0.23775
GO_POSITIVE_REGULATION_OF_ENDOTHELIAL_CELL_MIGRATION	1.92737e-07	0.283918	9.42477e-07	0.1842	4.64566e-07	0.275233	0.00540863	0.105108	2.00219e-05	0.234165	1.85437e-07	0.19563	0.499631	-0.0375777	0.340449	0.0361091
GO_DECIDUALIZATION	1.16418e-23	0.517506	1.53226e-33	0.434421	2.27241e-28	0.56127	2.51758e-62	0.573324	3.73673e-31	0.584396	7.59867e-78	0.62767	7.94138e-07	0.26979	6.55148e-27	0.390694
GO_REGULATION_OF_MONONUCLEAR_CELL_MIGRATION	2.74603e-21	0.492792	2.25071e-45	0.499436	3.71113e-33	0.599963	1.93936e-53	0.536877	2.32643e-31	0.586035	2.18451e-81	0.638714	2.19327e-10	0.34268	7.45366e-29	0.404197
GO_CERAMIDE_BIOSYNTHETIC_PROCESS	0.434576	-0.0434905	0.167387	-0.0522788	0.788397	0.0149445	0.00105946	-0.123589	0.226178	-0.0673165	0.00201707	-0.116598	0.0721441	-0.0998819	0.000211416	-0.139697
GO_NEGATIVE_REGULATION_OF_ORGAN_GROWTH	0.0850905	-0.0956624	0.551673	-0.0225521	0.0941601	-0.0930055	9.94569e-10	-0.228458	0.0601454	-0.104386	5.24821e-06	-0.171303	0.112515	-0.0881986	0.0246193	-0.0849998
GO_NEGATIVE_REGULATION_OF_RESPONSE_TO_BIOTIC_STIMULUS	9.74138e-19	0.463787	1.69672e-42	0.484867	1.05794e-26	0.546492	9.28517e-33	0.429584	8.53424e-23	0.508726	2.48521e-44	0.494236	1.49901e-06	0.263181	3.75179e-19	0.329398
GO_ORGANOPHOSPHATE_ESTER_TRANSPORT	2.96205e-10	0.340327	3.60223e-30	0.412997	1.21927e-12	0.380556	1.19568e-32	0.428899	1.08281e-09	0.329939	9.41518e-42	0.480981	0.0324362	0.118688	1.16371e-06	0.182665
GO_MICROTUBULE_CYTOSKELETON_ORGANIZATION	0.311315	-0.056334	0.259506	0.0427052	0.363037	-0.0506178	0.010172	-0.0971474	0.217636	-0.0685692	0.175381	-0.0513133	0.0362695	-0.116202	0.00423727	-0.108049
GO_HISTONE_MONOUBIQUITINATION	0.00199611	-0.170843	0.0340414	-0.0801843	0.00250916	-0.167107	4.33591e-08	-0.205301	1.01519e-05	-0.24212	3.77794e-07	-0.190712	4.96362e-05	-0.223077	4.87961e-09	-0.219013
GO_REGULATION_OF_CELL_CYCLE_G2_M_PHASE_TRANSITION	0.0214921	-0.127508	0.958298	-0.00198132	0.0110117	-0.140862	0.232679	-0.0451996	0.00957944	-0.143512	0.31112	-0.038365	0.0215359	-0.127466	0.0209836	-0.0872967
GO_EMBRYONIC_VISCEROCRANIUM_MORPHOGENESIS	1.6802e-08	0.306579	3.72509e-10	0.234088	3.3833e-11	0.356897	0.0269751	0.0836639	1.22032e-12	0.38055	3.28271e-06	0.17492	0.00274762	0.165603	0.333008	-0.0366692
GO_SOMATIC_CELL_DNA_RECOMBINATION	0.0215689	0.127434	9.83423e-07	0.183891	0.0294395	0.120812	1.64853e-06	0.180101	0.0382106	0.115028	1.26721e-07	0.19821	0.850457	-0.0104982	0.560296	0.0220652
GO_PIGMENTATION	6.92423e-06	0.246485	7.71043e-11	0.242827	9.28608e-12	0.366333	1.04319e-11	0.253457	1.80326e-09	0.325742	1.01208e-17	0.316442	0.00535063	0.154161	0.140132	0.0558574
GO_POSITIVE_REGULATION_OF_PROTEIN_LOCALIZATION_TO_CELL_PERIPHERY	0.190629	0.0727789	7.77483e-05	0.148882	0.00198375	0.170944	0.789561	-0.0101122	0.0405539	0.113676	0.0179294	0.0895114	0.0701488	-0.100586	0.627377	0.0183917
GO_POSITIVE_REGULATION_OF_TRANSLATIONAL_INITIATION	4.07742e-11	0.35551	6.46409e-14	0.278482	2.24063e-14	0.406689	3.35934e-19	0.329822	1.09841e-14	0.411118	1.0813e-27	0.396204	6.57126e-05	0.219536	1.93482e-05	0.160827
GO_NEGATIVE_REGULATION_OF_CELL_AGING	0.216625	0.0687198	0.202537	-0.0482589	0.124509	0.085382	0.0102642	-0.0970297	0.739077	0.0185456	0.0201079	-0.0879012	0.0219532	-0.127066	0.000217836	-0.139414
GO_B_CELL_MEDIATED_IMMUNITY	1.0622e-29	0.572549	1.08429e-70	0.603908	1.23099e-47	0.692015	4.89238e-86	0.652559	9.15479e-46	0.681793	1.52146e-117	0.730471	6.76906e-14	0.399687	1.40372e-40	0.474751
GO_AORTA_DEVELOPMENT	0.0862031	0.0953246	0.0341555	0.0801334	0.0280198	0.121883	0.435944	-0.0295132	0.176641	0.075133	0.386682	0.0327918	0.193525	-0.0723074	0.139636	-0.0559272
GO_CELL_DIFFERENTIATION_INVOLVED_IN_EMBRYONIC_PLACENTA_DEVELOPMENT	2.73265e-23	0.513776	6.2329e-32	0.424386	2.51224e-25	0.533727	3.96766e-50	0.522066	1.81044e-27	0.553376	1.89583e-63	0.577624	8.48294e-08	0.291762	1.54583e-17	0.314729
GO_ASYMMETRIC_CELL_DIVISION	6.73443e-05	0.219224	1.57671e-06	0.180431	2.16007e-06	0.259299	0.0517722	0.0735995	3.72018e-07	0.277454	2.12829e-06	0.178197	0.195371	-0.0720096	0.00981913	-0.0976067
GO_SPECIFICATION_OF_SYMMETRY	0.337197	0.0534033	0.0117786	0.0952202	0.882298	-0.00824435	0.0197691	-0.0881414	0.103587	0.0904522	0.855082	0.00692033	0.240959	0.0652259	0.763273	0.0114119
GO_PROTEIN_LOCALIZATION_TO_ENDOPLASMIC_RETICULUM	0.974134	-0.0018055	0.0184047	-0.089146	0.643259	-0.0257859	0.00810658	0.100069	0.967521	-0.00226734	0.267826	0.0419682	0.499222	0.0376136	0.0430724	0.0765419
GO_BILE_ACID_BIOSYNTHETIC_PROCESS	0.420693	0.0448157	0.000905861	0.125237	0.360302	0.0509066	0.0265136	0.0839175	0.319693	0.0553685	0.000391347	0.133753	0.22485	0.0675091	0.000280416	0.137
GO_NEGATIVE_REGULATION_OF_COAGULATION	2.05958e-22	0.50476	3.33706e-31	0.419729	6.13204e-28	0.557521	9.33444e-37	0.453517	3.07843e-29	0.56868	6.51637e-50	0.521077	6.07076e-09	0.315488	6.94599e-23	0.360554
GO_HISTONE_EXCHANGE	0.0160857	0.133431	0.00312622	0.11162	0.142248	0.0815792	1.52827e-13	0.274425	0.0345764	0.117271	8.51101e-11	0.242289	0.672384	0.0235446	0.000672563	0.128317
GO_LIPID_HOMEOSTASIS	0.00709863	0.149074	1.40199e-08	0.212503	0.000939462	0.182656	0.0356757	0.0794687	0.172211	0.0759072	0.000540043	0.130545	0.172718	-0.0758178	5.25215e-07	0.188391
GO_CELLULAR_RESPIRATION	0.176692	-0.075124	2.14526e-07	-0.194633	0.00172159	-0.173221	0.0133237	0.093575	0.0855574	-0.0955202	0.525975	-0.0240258	0.748755	0.0178333	0.529561	0.023818
GO_NUCLEOTIDE_EXCISION_REPAIR_DNA_DAMAGE_RECOGNITION	0.150418	-0.0799493	0.126808	-0.0578045	0.0403252	-0.113805	5.24393e-10	0.232144	0.137316	-0.082598	0.000102141	0.14643	0.0535715	-0.107177	0.120719	0.0587475
GO_REGULATION_OF_ENDOTHELIAL_CELL_DEVELOPMENT	4.22493e-16	0.430567	2.77959e-26	0.386197	5.38513e-17	0.442248	3.59122e-12	0.25893	1.87885e-18	0.460363	2.7658e-28	0.400306	0.0222288	0.126805	9.43925e-06	0.166669
GO_B_CELL_DIFFERENTIATION	5.01396e-14	0.401604	2.93663e-49	0.518053	8.86108e-26	0.537987	1.6504e-30	0.415223	4.19407e-15	0.416997	3.37198e-52	0.531415	0.142393	0.0815497	1.69931e-13	0.273921
GO_NEURAL_PRECURSOR_CELL_PROLIFERATION	0.330381	-0.0541606	5.6012e-08	0.203631	0.522693	-0.0355823	0.0212931	0.0870882	0.0454723	-0.111039	4.77588e-06	0.172036	0.00128254	-0.177865	0.440198	0.0292405
GO_NUCLEAR_TRANSPORT	0.571101	0.0315336	0.18872	0.0497725	0.573015	0.031377	0.113254	0.0599557	0.785064	0.0151858	0.0199029	0.0880461	0.0459973	-0.110772	0.138746	-0.0560531
GO_PEPTIDE_METABOLIC_PROCESS	0.227441	0.0671342	0.00171052	-0.118423	0.619334	0.0276585	3.13826e-06	0.175263	0.394569	0.047381	0.0329484	0.0806794	0.41628	0.0452423	0.0587017	0.0715387
GO_NEGATIVE_REGULATION_OF_CELL_SUBSTRATE_ADHESION	0.000246228	0.202039	0.00734931	0.101309	5.10623e-06	0.249902	0.344823	0.0357836	0.00974562	0.143187	0.022882	0.0860578	0.00577639	-0.152798	0.0266055	-0.0838667
GO_REGULATION_OF_EPITHELIAL_CELL_DIFFERENTIATION	8.67705e-05	0.215971	4.4157e-06	0.172643	0.000270695	0.200727	0.451824	0.0285028	2.10569e-06	0.259572	0.00137955	0.120766	0.0931071	0.0933032	0.464821	-0.0276906
GO_ENDOTHELIAL_CELL_MIGRATION	3.56496e-19	0.468952	1.06854e-26	0.389179	1.22653e-24	0.527128	3.66498e-35	0.444202	1.4755e-22	0.506267	8.36168e-49	0.515934	0.00449379	0.157228	1.33125e-10	0.239836
GO_ORGANIC_HYDROXY_COMPOUND_CATABOLIC_PROCESS	0.594562	-0.0296309	0.450911	0.0285603	0.650916	-0.0251927	0.869574	-0.00622167	0.0785835	-0.0977127	0.998224	8.43e-05	0.314854	-0.0559241	0.124512	0.0581558
GO_GLYCEROLIPID_METABOLIC_PROCESS	0.758008	-0.017155	0.00242936	0.114508	0.857942	0.00996699	0.669753	-0.0161591	0.279143	-0.0602097	0.220179	0.0464316	0.0163449	-0.13311	0.881944	0.005627
GO_PEPTIDYL_AMINO_ACID_MODIFICATION	0.914298	-0.00599268	0.0215656	0.0869068	0.78936	0.0148749	0.45552	-0.0282705	0.267258	-0.0617175	0.336584	0.0363991	0.00933331	-0.144002	0.146888	-0.0549241
GO_SECRETION	0.000117052	0.212064	5.99577e-05	0.151182	1.41329e-05	0.238279	0.0139104	0.0929942	7.66469e-05	0.217569	2.42971e-05	0.15893	0.796289	-0.0143744	0.795922	-0.00979951
GO_REGULATION_OF_SEQUESTERING_OF_TRIGLYCERIDE	0.575727	-0.0311556	0.000320378	0.135711	0.347629	-0.0522631	0.117346	-0.059286	0.0102772	-0.14218	0.865944	0.00639645	0.000770946	-0.185638	0.919557	0.00382669
GO_NEGATIVE_REGULATION_OF_FIBROBLAST_GROWTH_FACTOR_RECEPTOR_SIGNALING_PATHWAY	1.49193e-13	0.394579	3.49309e-18	0.320694	4.13563e-20	0.479736	1.50642e-24	0.373398	1.65699e-19	0.472832	6.36762e-35	0.442774	0.000521814	0.191398	2.08509e-17	0.313513
GO_NEGATIVE_REGULATION_OF_PROTEIN_OLIGOMERIZATION	0.0776161	-0.0980291	0.000441682	0.132556	0.399942	-0.0468454	0.830087	0.00813095	0.0841103	-0.095963	0.175925	0.0512487	0.739582	-0.0185084	6.85866e-06	0.169206
GO_CELL_ACTIVATION_INVOLVED_IN_IMMUNE_RESPONSE	1.02034e-29	0.572694	1.00179e-78	0.630457	5.41161e-47	0.68855	4.19838e-67	0.591189	3.17748e-39	0.642457	1.44133e-109	0.713009	6.10087e-11	0.352489	8.7825e-38	0.459367
GO_POSITIVE_REGULATION_OF_VASODILATION	2.45244e-08	0.303192	5.46372e-15	0.289772	7.4179e-10	0.33301	1.87006e-07	0.195572	7.08766e-09	0.314152	3.795e-17	0.311062	0.00310332	0.163566	3.92096e-10	0.233798
GO_HOMOCYSTEINE_METABOLIC_PROCESS	0.00525296	-0.154487	0.895108	0.00499568	0.0131851	-0.137372	0.0388266	-0.0781644	2.44209e-05	-0.231786	0.476538	-0.0269692	0.00238753	-0.167925	0.080529	-0.0661472
GO_NEGATIVE_REGULATION_OF_HISTONE_MODIFICATION	0.111462	-0.0884568	0.0408026	-0.0773915	0.126915	-0.0848426	3.46048e-07	-0.191325	0.104408	-0.0902387	2.28795e-05	-0.159433	0.10174	-0.0909377	0.0279088	-0.0831622
GO_COFACTOR_CATABOLIC_PROCESS	0.00222953	0.169046	0.0175658	-0.0897965	0.00696288	0.149427	0.0267325	0.0837968	0.157954	0.0785045	0.874639	0.005978	0.807636	0.0135573	0.662169	0.0165544
GO_PYRIMIDINE_CONTAINING_COMPOUND_CATABOLIC_PROCESS	2.58973e-12	0.375359	1.03424e-14	0.286905	3.49921e-11	0.356647	3.37482e-33	0.432311	7.03213e-14	0.399442	1.78311e-28	0.401614	2.20623e-06	0.259072	2.3767e-19	0.331145
GO_NEGATIVE_REGULATION_OF_DNA_BINDING	0.00247684	-0.167321	0.00118492	-0.1224	0.000171513	-0.206973	0.000422051	-0.133007	0.0025409	-0.166899	0.000416123	-0.133147	0.360987	-0.0508342	0.600944	-0.0198168
GO_VENTRAL_SPINAL_CORD_DEVELOPMENT	5.7304e-07	-0.273117	5.48429e-16	-0.29984	4.09902e-09	-0.318848	2.53657e-30	-0.413999	6.69212e-07	-0.27154	1.82364e-34	-0.440037	0.0793203	-0.0974738	6.69548e-15	-0.288862
GO_REGULATION_OF_CIRCADIAN_RHYTHM	9.15191e-12	-0.366438	3.25443e-17	-0.311693	1.61708e-15	-0.422706	9.82135e-38	-0.459093	1.54159e-19	-0.473195	1.74882e-33	-0.434069	3.30136e-10	-0.339472	1.80761e-25	-0.380266
GO_ANION_TRANSPORT	0.266729	0.0617857	0.517762	0.0245044	0.312123	0.0562401	0.212846	-0.0471779	0.901528	-0.00688987	0.862882	-0.00654401	0.120441	-0.0863125	0.0733184	-0.0677793
GO_CELL_CELL_ADHESION	2.38291e-19	0.470998	1.41695e-47	0.510125	2.52999e-30	0.577686	8.90437e-31	0.41697	3.35722e-23	0.51287	1.75768e-54	0.541394	0.000222508	0.203433	1.20171e-11	0.252722
GO_MORPHOGENESIS_OF_AN_ENDOTHELIUM	4.15272e-06	0.252193	0.0283944	0.0829069	2.64077e-06	0.257137	7.45964e-06	0.168542	5.64393e-07	0.27327	1.42202e-05	0.163359	0.363788	0.0505388	0.0475766	0.074962
GO_GUANOSINE_CONTAINING_COMPOUND_METABOLIC_PROCESS	0.574174	0.0312823	0.959847	0.00190764	0.397715	0.0470669	3.45766e-07	0.191331	0.678042	-0.0231136	0.000221042	0.139275	0.191425	-0.0726487	2.57054e-05	0.158458
GO_POSITIVE_REGULATION_OF_RELEASE_OF_SEQUESTERED_CALCIUM_ION_INTO_CYTOSOL	0.000354355	0.19695	0.414026	-0.0309433	0.000224074	0.203337	0.581389	0.0208893	4.45467e-05	0.224428	0.564242	0.0218437	0.754578	0.0174061	0.113613	-0.0598963
GO_REGULATION_OF_CYCLIC_NUCLEOTIDE_METABOLIC_PROCESS	0.0296189	-0.120679	0.000969895	-0.124521	0.0768687	-0.0982758	0.000946889	-0.124773	0.0141285	-0.136013	0.0053428	-0.105257	0.00344707	-0.16179	0.000359188	-0.134595
GO_CHONDROITIN_SULFATE_PROTEOGLYCAN_BIOSYNTHETIC_PROCESS	0.000725687	0.186542	2.05573e-07	0.194925	0.000110344	0.21284	0.00176025	0.118107	3.59251e-05	0.227089	2.74892e-07	0.192925	0.994599	-0.00037694	0.0389102	0.078131
GO_GLANDULAR_EPITHELIAL_CELL_DEVELOPMENT	0.149251	-0.0801779	5.74582e-06	-0.170596	0.0278255	-0.122033	1.38909e-07	-0.197591	0.159507	-0.0782132	9.44627e-08	-0.200178	0.028019	-0.121884	0.000175295	-0.14146
GO_RESPONSE_TO_MAGNESIUM_ION	1.14693e-06	0.265987	4.46282e-11	0.245783	2.24279e-06	0.258896	1.5596e-11	0.25136	1.1094e-08	0.310247	5.25442e-16	0.300023	0.000184699	0.205972	2.68445e-06	0.176449
GO_CELLULAR_RESPONSE_TO_ATP	3.13242e-07	0.279161	9.69804e-24	0.367227	9.70315e-08	0.290494	1.693e-25	0.380475	2.14449e-09	0.324301	4.48253e-39	0.466573	0.00708702	0.149104	9.7507e-21	0.343062
GO_CHOLESTEROL_EFFLUX	2.69183e-13	0.390706	3.62419e-22	0.35483	2.42337e-21	0.493381	1.05487e-23	0.366945	1.77388e-18	0.460664	9.27556e-28	0.396668	3.83866e-07	0.277142	1.01778e-14	0.286977
GO_PROTEIN_OLIGOMERIZATION	2.03616e-11	0.36064	3.37502e-12	0.259245	4.05398e-16	0.430806	4.17514e-16	0.301008	7.18986e-11	0.351249	6.97433e-21	0.344282	0.848548	0.0106338	0.000769326	0.126935
GO_BETA_CATENIN_DESTRUCTION_COMPLEX_DISASSEMBLY	0.485252	-0.0388465	0.256353	-0.0429888	0.601994	-0.0290353	1.79739e-07	-0.195842	0.237551	-0.0656997	0.000123224	-0.144722	0.138585	-0.0823332	0.00131478	-0.121285
GO_INNER_DYNEIN_ARM_ASSEMBLY	0.981624	0.0012826	4.54433e-07	0.189414	0.895182	-0.00733635	0.192923	0.0493037	0.181731	0.0742609	0.00048893	0.131543	0.0282399	0.121714	8.07606e-07	0.185316
GO_REGULATION_OF_EPITHELIAL_CELL_PROLIFERATION	3.48446e-12	0.373287	5.78625e-24	0.368952	2.76519e-16	0.433008	7.94514e-22	0.352069	4.32509e-15	0.416811	2.96341e-36	0.450616	0.0361918	0.11625	8.64432e-11	0.242204
GO_CHROMATIN_ASSEMBLY_OR_DISASSEMBLY	0.27814	-0.0603352	0.0220555	-0.0865857	0.0479158	-0.109817	0.698197	-0.0146918	0.0550343	-0.106533	0.205349	-0.0479602	0.0164339	-0.133001	0.48047	-0.0267293
GO_REGULATION_OF_NITRIC_OXIDE_SYNTHASE_ACTIVITY	0.000543424	0.190806	0.000986746	0.12434	0.000452961	0.193445	2.93645e-07	0.192468	0.000440313	0.193853	2.46075e-09	0.22313	0.670737	0.0236702	0.706176	0.0142842
GO_REGULATION_OF_ANDROGEN_RECEPTOR_SIGNALING_PATHWAY	0.000453485	0.193429	3.6409e-14	0.281151	8.94331e-08	0.291264	2.03087e-19	0.331744	4.37104e-10	0.337249	4.76135e-22	0.353873	0.00510276	0.155	1.45143e-10	0.239359
GO_LEFT_RIGHT_PATTERN_FORMATION	0.000894708	0.183396	1.38301e-08	0.212588	0.0112799	0.1404	3.2727e-05	0.156416	1.22989e-05	0.239901	1.11997e-09	0.227767	0.00934635	0.143976	3.17831e-09	0.221601
GO_REGULATION_OF_LIPID_BIOSYNTHETIC_PROCESS	7.03446e-06	0.246306	8.14647e-16	0.298135	3.9261e-07	0.276918	9.50029e-14	0.276675	0.000477946	0.192671	5.69565e-23	0.361234	0.0485267	-0.10952	2.12891e-07	0.194685
GO_RESPONSE_TO_XENOBIOTIC_STIMULUS	0.0321175	0.118905	0.558525	0.022165	0.037604	0.115389	0.0228888	0.0860535	0.00789442	0.147123	0.162455	0.0528919	0.00143874	0.176065	6.54948e-05	0.150404
GO_REGULATION_OF_MACROPHAGE_DERIVED_FOAM_CELL_DIFFERENTIATION	3.75342e-15	0.417668	3.05066e-44	0.493787	1.69232e-24	0.52577	1.57111e-33	0.434354	2.3337e-17	0.446864	3.91399e-47	0.508013	1.44857e-05	0.23799	6.95536e-15	0.288691
GO_EMBRYONIC_DIGESTIVE_TRACT_MORPHOGENESIS	6.77834e-05	0.219141	0.104462	0.061462	0.00297794	0.164259	0.0604541	0.0710497	1.32907e-06	0.264446	0.00445011	0.107464	2.61838e-08	0.302601	0.142663	0.0555038
GO_PLACENTA_BLOOD_VESSEL_DEVELOPMENT	3.72199e-11	0.356189	4.53365e-16	0.300656	2.60146e-09	0.322687	4.42793e-07	0.189597	6.89023e-17	0.440874	5.41362e-20	0.33673	0.100535	0.0912579	2.24021e-05	0.159609
GO_POSITIVE_REGULATION_OF_GUANYLATE_CYCLASE_ACTIVITY	0.720996	0.0198845	3.91171e-06	-0.173578	0.638408	-0.0261631	0.0529526	-0.0732328	0.28553	0.0594174	0.00178141	-0.117976	0.0526868	0.107574	0.029856	-0.0821605
GO_MELANIN_METABOLIC_PROCESS	0.0337183	0.11783	0.210864	-0.0473827	0.00107527	0.180592	0.00961958	-0.097873	0.0290921	0.12107	0.0625689	-0.070475	0.0946625	0.0928644	0.32495	0.0372848
GO_POSITIVE_REGULATION_OF_RESPONSE_TO_EXTERNAL_STIMULUS	6.01084e-29	0.56622	2.84334e-58	0.557258	4.11546e-45	0.678127	2.85343e-55	0.544768	1.49837e-39	0.644567	9.09265e-92	0.668677	2.77413e-09	0.322147	2.27917e-24	0.372037
GO_POSITIVE_REGULATION_OF_CELL_CYCLE_G2_M_PHASE_TRANSITION	0.000296365	-0.199464	1.46723e-08	-0.212218	0.000931283	-0.182788	2.56409e-12	-0.260632	0.007515	-0.14803	1.87918e-13	-0.273441	0.575907	-0.0311409	5.38474e-12	-0.256866
GO_REGULATION_OF_REMOVAL_OF_SUPEROXIDE_RADICALS	4.09093e-09	0.318865	3.06377e-13	0.271097	2.59336e-10	0.34137	1.35169e-28	0.402437	5.33375e-16	0.429217	1.92241e-34	0.439899	7.92729e-10	0.332473	1.02193e-08	0.214475
GO_NEGATIVE_REGULATION_OF_STEM_CELL_PROLIFERATION	2.16922e-10	0.342766	0.0455772	0.075647	7.81867e-10	0.332585	0.818004	0.00871913	1.11413e-13	0.396476	0.080801	0.066088	0.000331219	0.197903	0.029857	0.08216
GO_AGING	1.42739e-23	0.516619	1.9094e-34	0.439916	3.97893e-35	0.614483	1.00623e-50	0.524786	5.49512e-27	0.549065	7.2658e-69	0.597505	7.42138e-06	0.2457	3.02184e-17	0.311997
GO_REGULATION_OF_VACUOLAR_TRANSPORT	0.749886	-0.0177503	0.0475599	0.0749676	0.312211	0.05623	0.305291	-0.0388297	0.554671	-0.0328882	0.595302	0.0201246	0.00602471	-0.152044	0.0999368	-0.0622767
GO_CELLULAR_RESPONSE_TO_ELECTRICAL_STIMULUS	0.000788658	0.185298	4.9051e-05	0.152937	0.000316032	0.198564	0.0266712	0.0838305	0.000148281	0.208927	2.68461e-05	0.158092	0.126202	0.0850015	0.0617723	0.0706896
GO_REGULATION_OF_OXIDATIVE_PHOSPHORYLATION	0.00122313	-0.178602	0.114046	-0.0598247	3.74383e-05	-0.226581	0.071948	-0.0681042	0.000410424	-0.19486	0.0247607	-0.0849166	0.122012	-0.0859503	0.0165165	0.0906496
GO_NEGATIVE_REGULATION_OF_CHROMOSOME_SEGREGATION	0.0174072	-0.131839	0.168361	-0.0521593	0.0253541	-0.124028	0.311927	-0.0383011	0.000380814	-0.195928	0.117375	-0.0592813	6.97156e-06	-0.246408	0.000248153	-0.138173
GO_NEGATIVE_REGULATION_OF_EXTRINSIC_APOPTOTIC_SIGNALING_PATHWAY	1.88998e-22	0.505149	4.52503e-45	0.497933	9.39416e-31	0.581181	1.00965e-46	0.506029	5.42171e-25	0.530544	2.69322e-74	0.616135	0.000882903	0.183597	1.35443e-15	0.295928
GO_REGULATION_OF_BONE_DEVELOPMENT	2.14292e-14	0.406967	5.04091e-33	0.431233	1.14819e-17	0.450725	3.07144e-42	0.483527	2.24815e-18	0.459421	4.20094e-56	0.548284	1.59917e-07	0.285723	2.17915e-28	0.401017
GO_POSITIVE_REGULATION_OF_T_CELL_MEDIATED_CYTOTOXICITY	7.69931e-24	0.519297	1.61464e-49	0.519258	1.78917e-30	0.578913	1.1443e-65	0.585937	4.14538e-35	0.614355	3.23689e-80	0.635113	3.10333e-16	0.432346	3.54441e-35	0.444288
GO_REGULATION_OF_LEUKOCYTE_MEDIATED_CYTOTOXICITY	1.79173e-33	0.602345	6.11409e-81	0.637345	3.93205e-51	0.71003	2.78208e-78	0.629055	7.61727e-50	0.703553	1.13952e-115	0.726487	5.44715e-17	0.442184	2.56672e-42	0.483933
GO_REGULATION_OF_CHOLESTEROL_BIOSYNTHETIC_PROCESS	0.735704	0.0187945	4.88256e-05	0.152977	0.940129	-0.0041823	0.0743637	0.0675348	0.476926	-0.0395904	0.0311085	0.0815455	0.447609	-0.0422683	0.276497	0.0412167
GO_POLYSACCHARIDE_CATABOLIC_PROCESS	0.0133095	0.137188	2.12645e-05	0.160043	0.000553784	0.190531	0.00553314	0.10483	0.113909	0.0878595	0.000207905	0.139856	0.672634	0.0235255	0.00179504	0.117891
GO_NEGATIVE_REGULATION_OF_AUTOPHAGY	0.882201	0.0082512	6.83378e-05	0.150028	0.0277314	0.122106	0.534618	-0.0235262	0.521388	0.035694	0.163351	0.0527794	0.260747	0.062563	0.230318	0.0454287
GO_INNER_CELL_MASS_CELL_PROLIFERATION	4.88327e-06	0.250399	0.00370904	0.109625	2.24891e-05	0.232776	1.95656e-08	0.210403	0.000401232	0.195184	1.86105e-08	0.21072	0.641436	0.0259275	0.320331	0.0376422
GO_POSITIVE_REGULATION_OF_MRNA_SPLICING_VIA_SPLICEOSOME	0.504568	0.0371466	3.62704e-12	-0.258879	0.299089	0.057774	1.81655e-07	-0.19577	0.1742	0.0755578	1.31842e-11	-0.252238	0.01197	0.139254	0.0293418	-0.0824195
GO_POSTTRANSCRIPTIONAL_REGULATION_OF_GENE_EXPRESSION	0.06802	0.101356	0.739518	-0.0125981	0.142779	0.0814711	0.00193258	0.117074	0.1888	0.0730793	0.00846581	0.0995164	0.653123	-0.0250223	0.762956	0.0114277
GO_POSITIVE_REGULATION_OF_DNA_DEPENDENT_DNA_REPLICATION	0.254581	0.0633772	0.904037	-0.00456826	0.450616	0.0419893	0.598629	0.019943	0.914459	0.00598135	0.47888	0.0268262	0.309232	-0.0565766	0.514161	-0.0247155
GO_STARTLE_RESPONSE	4.17811e-16	-0.430632	4.60361e-26	-0.384611	4.79879e-18	-0.455409	9.32297e-39	-0.464815	2.29103e-19	-0.471197	9.43126e-43	-0.486187	1.1428e-07	-0.288941	2.73009e-24	-0.371442
GO_MOTOR_NEURON_AXON_GUIDANCE	0.0529434	-0.107459	1.16051e-07	-0.198801	0.0572908	-0.105565	8.43471e-07	-0.185003	0.0348598	-0.117089	3.96045e-07	-0.190381	0.000324389	-0.198197	4.29561e-10	-0.23328
GO_TRANSCRIPTION_FROM_RNA_POLYMERASE_II_PROMOTER	0.5965	-0.0294752	0.552078	0.0225292	0.927959	-0.00503461	0.0408968	-0.0773555	0.512737	-0.036438	0.621217	-0.0187215	0.169476	-0.0763925	0.138486	-0.05609
GO_PYRIMIDINE_RIBONUCLEOSIDE_CATABOLIC_PROCESS	3.54124e-28	0.559601	3.50799e-53	0.535752	5.25112e-33	0.59882	4.74782e-59	0.560409	9.58318e-39	0.639328	1.1987e-75	0.620584	6.10895e-16	0.428428	9.34233e-33	0.429567
GO_RESPONSE_TO_ENDOGENOUS_STIMULUS	0.000625549	0.188743	2.20898e-10	0.237026	3.5234e-06	0.254	0.0005642	0.130103	0.000560256	0.190361	4.37238e-11	0.245893	0.0182204	-0.130911	0.54434	0.0229691
GO_HYPOTHALAMUS_DEVELOPMENT	0.0670134	0.101726	0.314921	-0.0380651	0.209501	0.0697955	0.157477	0.053525	0.0272102	0.122515	0.665218	0.0163952	0.55013	0.0332659	0.00736727	-0.101279
GO_PATTERN_RECOGNITION_RECEPTOR_SIGNALING_PATHWAY	1.97756e-32	0.594413	1.21398e-78	0.630194	6.91557e-52	0.713746	1.62637e-72	0.610161	1.507e-40	0.650912	2.30578e-115	0.725829	1.04796e-11	0.365464	2.22616e-33	0.433425
GO_POSITIVE_REGULATION_OF_MEIOTIC_CELL_CYCLE	0.0830097	-0.0963038	4.92675e-07	-0.188844	0.0410753	-0.113384	4.86997e-07	-0.188926	0.00927636	-0.144117	3.97967e-09	-0.220248	0.014786	-0.135113	0.45244	-0.028464
GO_LATERAL_MESODERM_DEVELOPMENT	0.780484	-0.0155177	0.519364	0.0244107	0.177805	-0.0749319	0.00164895	0.118825	0.652421	-0.0250765	0.000394568	0.133672	0.244592	0.0647259	0.0498653	0.0742068
GO_POSITIVE_REGULATION_OF_CELL_MATRIX_ADHESION	1.23434e-17	0.450334	7.59027e-21	0.343975	1.40128e-26	0.545381	1.12424e-10	0.240766	1.68654e-22	0.505664	1.5991e-21	0.349586	0.00044219	0.193792	0.00203709	0.116488
GO_EMBRYO_DEVELOPMENT	0.00958425	0.143502	0.000584798	0.129741	0.0165405	0.132871	0.958091	0.00199114	0.0213439	0.127652	0.00626764	0.103296	0.241857	-0.0651017	0.22916	-0.0455416
GO_REGULATION_OF_STRIATED_MUSCLE_CONTRACTION	0.193198	0.0723604	0.168364	0.052159	0.551396	0.0331605	0.600765	0.0198266	0.284093	0.0595946	0.096526	0.0629104	0.139449	-0.082154	0.64145	-0.0176436
GO_REGULATION_OF_LEUKOCYTE_DIFFERENTIATION	6.10949e-31	0.582686	8.143e-76	0.621132	1.67568e-48	0.696605	1.14176e-69	0.600341	1.45754e-46	0.686204	8.6982e-114	0.722413	4.93739e-11	0.354079	6.8872e-39	0.465543
GO_REGULATION_OF_TRANSCRIPTION_ELONGATION_FROM_RNA_POLYMERASE_II_PROMOTER	0.00171803	-0.173254	1.26325e-11	-0.252461	6.16802e-05	-0.220341	8.39372e-15	-0.287846	0.00388615	-0.159742	8.03658e-19	-0.326458	0.416408	-0.0452299	4.77224e-09	-0.219148
GO_WATER_TRANSPORT	0.0235533	0.125589	1.134e-05	0.165195	0.123063	0.08571	9.51726e-11	0.241679	0.0204526	0.128538	3.61194e-12	0.258901	0.00143422	0.176115	9.1288e-06	0.166937
GO_ESTABLISHMENT_OF_CELL_POLARITY	0.017187	-0.132097	0.187998	-0.0498537	0.111161	-0.0885311	2.98099e-25	-0.37866	0.0131233	-0.137464	5.88604e-15	-0.289439	0.00123273	-0.178481	1.8022e-08	-0.210923
GO_BIOTIN_METABOLIC_PROCESS	0.919931	-0.00559743	0.0516918	0.0736247	0.265829	0.0619019	0.0548287	0.0726638	0.78347	0.0153012	0.0400077	0.0776985	0.477957	-0.039498	0.425973	0.0301585
GO_STEM_CELL_DIVISION	0.733546	0.018954	2.43942e-06	0.177172	0.188522	0.0731251	0.15108	0.0543613	0.238256	0.0656012	0.00011401	0.145432	0.185184	-0.0736796	0.328857	-0.0369851
GO_REACTIVE_OXYGEN_SPECIES_BIOSYNTHETIC_PROCESS	8.63859e-17	0.439608	7.29653e-13	0.266878	1.73948e-18	0.460767	3.07045e-17	0.311931	3.42531e-22	0.502447	2.69347e-23	0.363785	7.73132e-08	0.292634	1.17105e-07	0.198741
GO_POSITIVE_REGULATION_OF_NITRIC_OXIDE_SYNTHASE_BIOSYNTHETIC_PROCESS	4.80168e-22	0.500901	2.61593e-43	0.48905	7.75813e-34	0.605058	8.45733e-30	0.410545	1.7671e-25	0.535172	1.12487e-51	0.52908	0.000116543	0.212122	1.35063e-11	0.252112
GO_DIGESTIVE_SYSTEM_DEVELOPMENT	0.0042954	0.158013	3.80486e-06	0.17379	0.00608924	0.151853	0.415198	0.0308657	0.000687054	0.187355	0.00112124	0.122988	0.985805	-0.000990693	0.273002	0.0415176
GO_POSITIVE_REGULATION_OF_STEROID_BIOSYNTHETIC_PROCESS	0.0626783	0.103377	0.61319	0.0191532	0.118262	0.0868212	0.304349	-0.0389054	0.358062	0.0511442	0.934502	-0.00311397	0.844863	0.0108959	0.768988	-0.0111283
GO_DNA_CONFORMATION_CHANGE	0.28076	-0.060008	0.460877	-0.0279357	0.0939733	-0.0930581	0.328519	0.037011	0.0994645	-0.0915451	0.74533	0.0123067	0.0257894	-0.123665	0.608447	-0.0194096
GO_DETECTION_OF_MECHANICAL_STIMULUS	9.44165e-05	-0.214876	5.6024e-16	-0.299748	2.15108e-08	-0.304371	5.31278e-32	-0.424825	1.9416e-08	-0.305289	5.36987e-36	-0.449112	0.000357965	-0.196806	1.12448e-07	-0.199013
GO_SEXUAL_REPRODUCTION	0.0583116	0.105138	0.270631	0.0417232	0.201957	0.0709637	0.0609307	-0.0709188	0.375575	0.0493109	0.346045	-0.0356932	0.0115611	-0.139926	0.00204991	-0.116418
GO_EPIDERMAL_CELL_DIFFERENTIATION	0.0642444	0.10277	0.00558723	0.104711	0.0412651	0.113278	0.925771	-0.00353022	0.0132052	0.137342	0.0225614	0.0862606	0.237837	0.0656597	0.325865	0.0372144
GO_SYNAPTONEMAL_COMPLEX_ORGANIZATION	0.00368169	-0.160668	7.38423e-06	-0.168623	1.77307e-06	-0.261404	0.000243213	-0.138365	0.0127447	-0.138036	2.04666e-08	-0.210118	0.873064	-0.00889644	0.21277	-0.0471857
GO_BASE_EXCISION_REPAIR	0.165114	-0.0771791	0.0827938	-0.0656591	0.15793	-0.0785089	0.0969161	0.0628371	0.101068	-0.0911158	0.731928	0.0129796	0.724993	-0.0195876	0.0232974	0.0857987
GO_CELLULAR_CARBOHYDRATE_CATABOLIC_PROCESS	0.863551	0.0095695	0.000276805	0.137125	0.295455	0.0582095	0.0203496	0.0877321	0.646262	-0.0255529	0.00159037	0.119221	0.0808457	-0.0969848	0.00714675	0.101661
GO_NEGATIVE_REGULATION_OF_TYPE_2_IMMUNE_RESPONSE	9.5844e-18	0.451701	2.19618e-24	0.372159	5.41197e-21	0.489578	1.54234e-30	0.415415	1.70478e-25	0.53532	3.51903e-44	0.493475	0.00226509	0.168788	3.26608e-07	0.191728
GO_REGULATION_OF_NUCLEOSIDE_METABOLIC_PROCESS	0.00528568	-0.154377	0.767504	0.0112019	0.0486332	-0.109468	3.3963e-08	-0.206881	0.000400006	-0.195228	0.000267654	-0.137448	2.24445e-06	-0.258888	0.00111926	-0.123007
GO_TAXIS	8.50071e-14	0.398224	8.12289e-35	0.442143	2.5293e-21	0.493179	1.19388e-24	0.374159	4.48254e-16	0.430225	5.33169e-46	0.502513	0.00424044	0.158237	3.91466e-11	0.246485
GO_CITRULLINE_METABOLIC_PROCESS	0.84553	0.0108484	4.47932e-08	0.205089	0.917506	0.00576753	0.0844645	0.0653059	0.185085	-0.0736962	6.98491e-05	0.149835	0.0378454	-0.115245	1.2705e-06	0.182022
GO_NEGATIVE_REGULATION_OF_AXON_GUIDANCE	0.000341258	-0.197482	2.57842e-07	-0.193367	0.000187374	-0.205777	6.99447e-18	-0.317926	2.0388e-05	-0.233949	1.26003e-16	-0.306079	9.43592e-06	-0.242961	2.50144e-08	-0.208842
GO_ORGAN_FORMATION	0.0929517	0.0933473	0.750713	-0.0120376	0.292737	0.0585376	0.529672	-0.0238115	0.261835	0.0624207	0.668212	0.0162392	0.431418	-0.0437898	0.0297576	0.0822098
GO_NEGATIVE_REGULATION_OF_CALCIUM_ION_TRANSPORT_INTO_CYTOSOL	0.00128431	0.177843	0.0183417	0.089194	0.0506518	0.108509	1.44631e-09	0.226272	0.0002252	0.203268	6.01617e-09	0.217738	0.0149596	0.134881	3.79922e-05	0.155142
GO_REGULATION_OF_CARDIAC_MUSCLE_CELL_MEMBRANE_REPOLARIZATION	0.016575	-0.132829	0.448095	-0.0287382	0.0761328	-0.0985206	1.03369e-09	-0.228233	0.0461271	-0.110706	1.12462e-05	-0.165262	0.0188518	-0.130215	0.0148089	-0.0921453
GO_RESPONSE_TO_GLUCAGON	0.0673483	-0.101602	0.0540158	-0.0729083	0.136851	-0.0826955	0.0223685	-0.0863838	0.00117606	-0.179211	0.092291	-0.0637227	5.15628e-06	-0.249793	4.05387e-05	-0.154585
GO_NEGATIVE_REGULATION_OF_TISSUE_REMODELING	0.000327156	0.198077	3.55029e-20	0.338302	6.61458e-06	0.247001	2.57499e-05	0.158443	6.17196e-06	0.247781	1.43176e-13	0.274735	0.0474706	0.110036	6.59536e-07	0.18677
GO_MEMBRANE_TUBULATION	1.48789e-09	0.327331	1.67046e-23	0.3654	5.30569e-13	0.38619	5.45657e-08	0.203802	1.23178e-12	0.380486	6.78726e-18	0.318047	0.000213624	0.203991	6.27944e-14	0.278617
GO_EMBRYONIC_PLACENTA_DEVELOPMENT	4.29662e-14	0.402585	1.31614e-32	0.428638	9.88867e-16	0.42561	1.5234e-21	0.349759	1.96829e-14	0.407499	2.47252e-39	0.467994	0.0252182	0.124142	2.24433e-10	0.236937
GO_SMALL_MOLECULE_BIOSYNTHETIC_PROCESS	0.0977057	0.0920223	0.128479	0.0575518	0.360687	0.0508659	1.80984e-05	0.16138	0.765975	-0.016573	0.00055128	0.130337	0.201568	-0.0710248	0.00300508	0.112077
GO_ANATOMICAL_STRUCTURE_MATURATION	0.684564	0.0226186	0.000192669	0.140573	0.352806	0.0517053	0.0872799	-0.0647233	0.605542	0.0287522	0.198552	0.0486875	0.0777707	-0.0979783	0.0924218	0.0636971
GO_REGULATION_OF_AMYLOID_PRECURSOR_PROTEIN_CATABOLIC_PROCESS	2.27229e-12	0.376268	8.79907e-32	0.423435	2.51139e-21	0.493213	4.71439e-25	0.377181	1.78583e-19	0.472455	4.38373e-38	0.461065	4.02916e-09	0.318994	2.81023e-16	0.302695
GO_CELLULAR_EXTRAVASATION	7.80426e-24	0.519238	1.67395e-58	0.558194	3.47617e-36	0.621987	5.52171e-59	0.560144	3.29598e-29	0.56843	1.1861e-92	0.671077	0.000105998	0.213367	1.24685e-22	0.35854
GO_REGULATION_OF_TELOMERE_MAINTENANCE	0.000917194	-0.18302	2.45496e-09	-0.223144	0.00122828	-0.178537	8.10302e-07	-0.185292	3.40192e-06	-0.254384	1.18308e-09	-0.227447	3.86183e-07	-0.277082	6.64459e-10	-0.230788
GO_REGULATION_OF_EXTRINSIC_APOPTOTIC_SIGNALING_PATHWAY_VIA_DEATH_DOMAIN_RECEPTORS	5.17106e-27	0.549303	5.39646e-61	0.568144	4.91357e-39	0.641226	6.99508e-64	0.579264	1.74696e-39	0.644137	2.21557e-95	0.678343	4.21299e-10	0.337541	3.65059e-24	0.370481
GO_NEGATIVE_REGULATION_OF_WOUND_HEALING	6.57487e-16	0.428	7.43919e-24	0.368114	1.30359e-17	0.450038	2.45042e-15	0.293329	5.86326e-17	0.441774	8.6919e-28	0.396865	0.0127066	0.138094	1.55038e-11	0.251391
GO_REGULATION_OF_IMMUNOGLOBULIN_PRODUCTION	4.75998e-30	0.575434	1.79608e-54	0.541353	1.02921e-39	0.645615	1.07079e-71	0.607372	6.33655e-42	0.659424	5.2221e-97	0.682579	5.40635e-14	0.401124	2.37899e-31	0.420674
GO_FATTY_ACYL_COA_METABOLIC_PROCESS	0.462002	-0.0409419	0.00356429	-0.110093	0.687601	-0.0223886	0.00490339	-0.106298	0.0168811	-0.13246	0.000471099	-0.131914	0.00077576	-0.185545	4.45326e-05	-0.153774
GO_NEGATIVE_REGULATION_OF_MUSCLE_CELL_APOPTOTIC_PROCESS	0.61716	0.0278302	0.368642	0.0340552	0.123585	0.0855911	0.0296375	-0.0822701	0.802665	-0.0139149	0.24457	-0.0440704	0.0109966	-0.140888	0.207528	-0.0477306
GO_GPI_ANCHOR_METABOLIC_PROCESS	0.000125993	0.211093	0.000310635	0.136011	1.78262e-05	0.235545	3.2073e-28	0.399863	0.00892339	0.144845	2.19723e-23	0.364474	0.0840724	0.0959746	9.92403e-10	0.22847
GO_POSITIVE_REGULATION_OF_HISTONE_DEACETYLATION	0.000214499	0.203935	9.99448e-13	0.26533	5.77778e-05	0.221168	0.00957745	0.0979298	3.48405e-07	0.278106	7.49852e-07	0.18585	6.35119e-05	0.219969	2.25194e-10	0.236918
GO_BLOOD_COAGULATION_FIBRIN_CLOT_FORMATION	1.62509e-10	0.34501	1.6431e-12	0.262863	1.02763e-08	0.310918	8.78112e-20	0.334916	3.40771e-08	0.30021	2.38292e-26	0.386679	0.0623609	0.103502	1.72922e-11	0.250818
GO_POSITIVE_REGULATION_OF_INSULIN_SECRETION	9.16597e-05	-0.215261	4.44571e-07	-0.189569	1.27736e-05	-0.23946	6.82879e-18	-0.318022	0.00100065	-0.181694	5.51547e-16	-0.299815	0.0177002	-0.1315	0.000800802	-0.12652
GO_NEGATIVE_REGULATION_OF_NEUROTRANSMITTER_TRANSPORT	1.58036e-15	-0.422842	7.9189e-11	-0.242682	6.48145e-13	-0.384844	3.72049e-31	-0.419424	3.47193e-19	-0.469087	1.70889e-28	-0.401741	9.82703e-11	-0.348875	9.06997e-24	-0.367451
GO_AMYLOID_PRECURSOR_PROTEIN_METABOLIC_PROCESS	2.7866e-07	0.280315	6.8033e-15	0.28879	3.67471e-12	0.372914	1.06857e-20	0.342727	3.82041e-09	0.319446	1.85014e-20	0.340713	0.00315368	0.163295	2.50323e-06	0.176977
GO_NUCLEIC_ACID_PHOSPHODIESTER_BOND_HYDROLYSIS	0.401928	0.0466485	0.0388311	0.0781626	0.337996	0.0533153	1.25876e-07	0.198255	0.586966	0.0302431	3.62713e-06	0.174157	0.631282	-0.0267195	0.171322	0.0517993
GO_CHEMICAL_HOMEOSTASIS_WITHIN_A_TISSUE	3.0352e-05	0.229152	0.746976	0.0122244	0.000554013	0.190525	0.226647	0.0457881	0.0016659	0.173745	0.169962	0.0519641	0.136563	-0.0827561	0.00842221	-0.0995823
GO_REGULATION_OF_MYELOID_CELL_DIFFERENTIATION	3.5349e-18	0.457033	7.32833e-68	0.593924	3.61026e-32	0.59239	1.25684e-49	0.519761	1.61068e-23	0.516092	3.80186e-86	0.652876	0.00201462	0.170694	2.59314e-22	0.355999
GO_REGULATION_OF_RESPONSE_TO_EXTERNAL_STIMULUS	9.21795e-26	0.537827	9.10028e-48	0.511042	3.36905e-41	0.65497	1.34835e-51	0.528727	4.45669e-29	0.567323	2.42256e-79	0.632392	5.9574e-06	0.248178	3.89518e-21	0.346392
GO_REGULATION_OF_RNA_POLYMERASE_II_TRANSCRIPTIONAL_PREINITIATION_COMPLEX_ASSEMBLY	0.0144619	-0.135552	9.16318e-09	-0.215151	1.38592e-05	-0.238508	0.000358625	-0.13461	0.000816034	-0.184785	3.75979e-07	-0.190745	0.000165107	-0.207486	0.0039549	-0.108868
GO_RETROGRADE_PROTEIN_TRANSPORT_ER_TO_CYTOSOL	3.8618e-17	0.444092	2.12193e-18	0.322663	1.6e-20	0.484371	3.32929e-42	0.483344	8.16054e-16	0.426737	1.58871e-42	0.485015	0.000452074	0.193474	3.74462e-13	0.270127
GO_EPITHELIAL_CELL_CELL_ADHESION	8.18304e-11	0.350268	1.5682e-27	0.395075	2.47518e-15	0.42017	2.49325e-26	0.386538	3.06669e-14	0.404718	1.16893e-43	0.490835	8.58763e-05	0.216105	3.76737e-15	0.291427
GO_REGULATION_OF_MITOCHONDRION_ORGANIZATION	4.08989e-08	0.298541	0.0778832	0.0667318	2.99017e-10	0.340252	6.24465e-15	0.289174	8.67528e-09	0.312397	9.64252e-13	0.265507	0.00240328	0.167817	7.09869e-06	0.168934
GO_POLYAMINE_METABOLIC_PROCESS	2.53451e-07	0.281246	9.41196e-07	0.18421	7.59729e-09	0.31355	2.78177e-19	0.330544	5.23915e-12	0.370414	1.6244e-20	0.341192	4.04769e-09	0.318955	2.35346e-16	0.303447
GO_POSITIVE_REGULATION_OF_MUSCLE_CONTRACTION	6.09421e-09	0.315455	5.9443e-09	0.217811	3.31649e-07	0.278595	1.13821e-13	0.275822	2.79529e-09	0.322084	7.99777e-19	0.326477	0.731972	0.0190704	3.69102e-05	0.155389
GO_NEGATIVE_REGULATION_OF_T_CELL_RECEPTOR_SIGNALING_PATHWAY	6.40636e-23	0.510006	4.20747e-45	0.49809	3.09708e-29	0.568658	1.97878e-54	0.541172	4.11687e-32	0.591946	1.04203e-74	0.6175	1.04406e-09	0.330236	3.88549e-21	0.346401
GO_PTERIDINE_CONTAINING_COMPOUND_BIOSYNTHETIC_PROCESS	0.0795947	0.0973853	0.266807	0.0420576	0.635944	0.0263552	1.82552e-12	0.262337	0.00549346	0.153693	3.14117e-09	0.221671	0.00112264	0.179929	0.000154083	0.142662
GO_BLOOD_VESSEL_ENDOTHELIAL_CELL_MIGRATION	3.81248e-11	0.35601	4.09602e-08	0.20567	7.84042e-11	0.350593	7.626e-11	0.242887	2.04718e-12	0.376991	3.09104e-17	0.311904	0.536153	0.0344386	0.00307486	0.111812
GO_POSITIVE_REGULATION_OF_PROTEIN_LOCALIZATION_TO_NUCLEUS	3.77897e-10	0.338404	8.45556e-26	0.382687	1.09851e-13	0.396568	1.19284e-26	0.388838	2.91002e-10	0.340466	4.12076e-44	0.493129	0.132744	0.0835679	1.26026e-10	0.240138
GO_POSITIVE_REGULATION_OF_BMP_SIGNALING_PATHWAY	0.0188293	0.13024	0.0173433	-0.0899736	0.0035968	0.161067	0.00535598	-0.105227	0.000693891	0.187208	0.01338	-0.0935184	0.525651	0.0353297	0.146597	-0.0549636
GO_REGULATION_OF_INTERFERON_GAMMA_BIOSYNTHETIC_PROCESS	3.16571e-21	0.492121	1.29318e-66	0.589412	8.80604e-33	0.59711	1.27741e-46	0.505534	1.39962e-30	0.57978	2.6371e-77	0.625945	1.09754e-13	0.396574	1.16387e-44	0.495888
GO_PROXIMAL_DISTAL_PATTERN_FORMATION	0.140173	0.0820046	0.00704301	0.101844	0.523294	0.0355309	0.00326872	0.111103	0.023457	0.125675	0.000156376	0.142524	0.0101396	0.142436	0.0584408	0.0716125
GO_STRIATED_MUSCLE_CONTRACTION	0.00469386	-0.156468	0.121313	0.0586538	0.000532734	-0.191096	0.0205688	-0.0875803	0.00034817	-0.197199	0.344174	-0.0358318	0.00958959	-0.143492	0.867367	0.00632795
GO_NEGATIVE_REGULATION_OF_ANION_TRANSPORT	1.8724e-06	0.260825	2.12261e-08	0.209887	2.33708e-06	0.258453	4.70918e-07	0.189163	1.06439e-07	0.289617	9.02031e-12	0.254211	0.0046352	0.156688	0.0345079	0.0799771
GO_NEGATIVE_REGULATION_OF_CD4_POSITIVE_ALPHA_BETA_T_CELL_DIFFERENTIATION	2.19993e-19	0.471402	2.02418e-30	0.414642	1.28918e-27	0.554682	3.49242e-28	0.399608	1.35259e-33	0.603259	1.82668e-46	0.504781	3.50094e-07	0.278058	2.04349e-13	0.27304
GO_ECTODERM_DEVELOPMENT	0.0868788	-0.0951211	0.00209537	0.116173	0.0768991	-0.0982657	0.000287474	-0.13676	0.00247544	-0.16733	0.281002	-0.0408325	0.000258482	-0.201367	0.396873	-0.0320939
GO_HYALURONAN_METABOLIC_PROCESS	6.95187e-23	0.509641	1.04727e-37	0.458935	7.77306e-31	0.581845	3.74643e-58	0.55677	8.6146e-28	0.556226	6.86465e-80	0.6341	2.38362e-05	0.232077	8.36368e-26	0.382722
GO_LEUKOCYTE_MIGRATION	1.66913e-32	0.59498	1.10081e-67	0.593288	1.65044e-45	0.680362	7.38765e-76	0.62127	1.34252e-40	0.651227	7.31284e-115	0.724749	5.11863e-10	0.33599	1.72943e-32	0.427896
GO_NEGATIVE_REGULATION_OF_INTRACELLULAR_PROTEIN_TRANSPORT	0.52779	-0.0351474	7.2254e-06	-0.168795	0.983094	0.00117993	1.01282e-07	-0.199713	0.344109	-0.0526454	5.57052e-06	-0.170838	0.00272146	-0.165762	0.032382	-0.0809415
GO_MEIOSIS_I	0.0067743	-0.149926	0.709281	-0.014126	0.000118492	-0.211903	0.0262911	0.0840411	0.000198203	-0.205014	0.25201	0.0433833	0.000124559	-0.211244	0.472345	-0.0272263
GO_SENSORY_PERCEPTION_OF_PAIN	0.00103896	-0.181119	5.57641e-10	-0.231792	1.69565e-05	-0.236137	2.80571e-10	-0.235686	1.10927e-06	-0.266335	2.37335e-11	-0.249149	2.86857e-06	-0.256241	5.12512e-09	-0.218715
GO_NEGATIVE_REGULATION_OF_GENE_EXPRESSION_EPIGENETIC	0.224028	0.0676286	0.915785	0.00400676	0.715356	0.0203046	0.0907826	0.0640192	0.437953	0.0431718	0.10668	0.0610729	0.960632	-0.00274865	0.0352291	0.0796614
GO_ALDITOL_METABOLIC_PROCESS	0.869928	0.00911817	0.698209	-0.0146911	0.19443	-0.0721612	3.02453e-05	0.157085	0.034654	-0.117221	0.00747442	0.101097	0.00318678	-0.163119	0.491387	0.0260687
GO_MITOCHONDRIAL_ELECTRON_TRANSPORT_UBIQUINOL_TO_CYTOCHROME_C	0.0504368	-0.10861	4.3762e-08	-0.205241	1.16046e-05	-0.240575	0.0661223	0.0695445	0.00236224	-0.1681	0.38955	-0.0325943	0.531209	-0.0348569	0.927325	-0.00345609
GO_REGULATION_OF_ANATOMICAL_STRUCTURE_SIZE	0.000128033	0.21088	3.26809e-10	0.234827	4.38037e-06	0.251604	0.0177758	0.0896312	0.00011622	0.212158	5.06297e-08	0.204291	0.447305	-0.0422967	0.413176	0.0309996
GO_REGULATION_OF_CELL_PROLIFERATION_INVOLVED_IN_KIDNEY_DEVELOPMENT	3.04498e-13	0.389891	8.20969e-17	0.307869	1.73146e-13	0.393607	1.16835e-18	0.325002	1.56953e-19	0.473104	6.5261e-31	0.417846	4.78379e-09	0.317531	3.15223e-11	0.247642
GO_POSITIVE_REGULATION_OF_MITOCHONDRION_ORGANIZATION	3.57566e-05	0.227146	0.107584	-0.060916	0.000363189	0.196601	0.000105906	0.146102	0.0007176	0.186709	0.00470416	0.106798	0.19941	0.0713652	0.0290673	0.0825593
GO_POSITIVE_REGULATION_OF_CATALYTIC_ACTIVITY	3.76051e-07	0.277347	1.24255e-25	0.381463	7.36047e-12	0.367997	1.33491e-07	0.197859	6.76392e-08	0.293885	4.77957e-21	0.345653	0.984296	0.00109605	0.00041748	0.133115
GO_POSITIVE_REGULATION_OF_SIGNAL_TRANSDUCTION_BY_P53_CLASS_MEDIATOR	3.2244e-09	0.320881	0.0187054	0.0889191	6.29936e-10	0.334327	0.0113137	0.0957526	6.3279e-13	0.385006	0.00395992	0.108853	0.0342237	0.117499	0.00993608	0.0974529
GO_PEPTIDYL_LYSINE_MODIFICATION	4.78713e-06	-0.25062	0.000320126	-0.135718	3.37751e-05	-0.227846	1.26535e-10	-0.240116	1.81148e-07	-0.284519	4.32968e-10	-0.233235	0.000197852	-0.205038	5.20423e-09	-0.218622
GO_METHYLATION_DEPENDENT_CHROMATIN_SILENCING	2.1117e-05	0.23353	0.0675558	0.0691807	4.18602e-06	0.252105	0.168742	0.0521127	3.20811e-08	0.30076	0.0557042	0.0724038	0.0459179	0.110812	0.206905	0.0477961
GO_REGULATION_OF_LIPOPROTEIN_LIPASE_ACTIVITY	0.00290103	0.164697	3.72209e-16	0.301499	0.000172766	0.206875	6.47277e-25	0.376154	0.00641201	0.150922	4.35216e-27	0.391954	0.0502285	0.108708	4.69296e-21	0.345719
GO_HORMONE_MEDIATED_SIGNALING_PATHWAY	0.32088	-0.0552331	0.844437	0.00743498	0.688708	-0.022305	1.13263e-09	-0.227701	0.107531	-0.0894385	0.00010642	-0.146058	7.84626e-05	-0.217269	1.9638e-09	-0.224469
GO_ANDROGEN_BIOSYNTHETIC_PROCESS	0.000186176	-0.205864	2.41304e-21	-0.348114	4.99792e-07	-0.274498	1.25673e-19	-0.333565	0.00130981	-0.177537	2.43621e-29	-0.407476	0.270267	-0.0613315	2.39305e-11	-0.249105
GO_NEGATIVE_REGULATION_OF_PROTEIN_BINDING	1.00769e-11	0.365746	9.18006e-17	0.307403	2.59369e-15	0.41989	2.94856e-20	0.338991	1.07308e-15	0.42513	2.61667e-30	0.413911	0.00344846	0.161784	5.17538e-16	0.300089
GO_POSITIVE_REGULATION_OF_OLIGODENDROCYTE_DIFFERENTIATION	0.874109	-0.00882259	0.130506	0.0572488	0.958113	0.00292462	0.317813	-0.0378384	0.804238	0.0138016	0.311496	-0.0383352	0.0228255	0.12625	0.269343	-0.0418355
GO_AXONEMAL_DYNEIN_COMPLEX_ASSEMBLY	0.526375	0.0352679	7.71985e-08	0.201519	0.63953	0.0260758	0.0465103	0.0753242	0.0154429	0.134247	9.53918e-05	0.147048	0.0142604	0.13583	1.01203e-07	0.199718
GO_REGULATION_OF_LIPID_METABOLIC_PROCESS	0.000968305	0.182195	1.14195e-13	0.275807	0.000185574	0.205908	7.80114e-09	0.216144	0.0431418	0.112257	1.40313e-15	0.295774	0.0408411	-0.113514	0.000889076	0.125433
GO_HEMIDESMOSOME_ASSEMBLY	8.40815e-15	0.412761	2.37955e-06	0.177359	2.40554e-17	0.446698	0.0560792	0.0722935	7.53249e-17	0.440376	5.41997e-05	0.152067	0.000629198	0.188657	0.0242295	0.0852315
GO_MAST_CELL_ACTIVATION	8.77135e-19	0.46433	3.19336e-53	0.53593	2.05866e-26	0.543854	2.66061e-54	0.540619	5.03961e-27	0.549403	2.62162e-82	0.641513	1.57365e-08	0.307161	4.21066e-31	0.419077
GO_RESPONSE_TO_EXTERNAL_STIMULUS	2.33804e-26	0.543347	4.23449e-52	0.530975	3.33225e-39	0.642323	1.55017e-52	0.532911	1.52055e-31	0.587498	1.23225e-83	0.645499	6.84507e-07	0.27131	1.89775e-22	0.357086
GO_PROTEIN_IMPORT_INTO_NUCLEUS_TRANSLOCATION	1.08328e-10	0.34813	2.1798e-07	0.194523	5.55423e-11	0.353196	4.59252e-17	0.310276	5.77724e-10	0.335021	5.83976e-22	0.353155	0.0142805	0.135802	4.17472e-05	0.154332
GO_REGULATION_OF_ADENYLATE_CYCLASE_ACTIVITY	6.43684e-07	-0.271936	4.33881e-10	-0.233223	8.53044e-07	-0.269054	3.28876e-16	-0.302026	9.36103e-08	-0.290833	2.89383e-14	-0.282211	1.2914e-05	-0.239333	7.0828e-07	-0.186259
GO_POSITIVE_REGULATION_OF_LEUKOCYTE_DIFFERENTIATION	1.90417e-31	0.586725	6.90995e-73	0.611418	3.50417e-46	0.684108	6.41805e-76	0.621469	2.20621e-46	0.685216	2.63757e-118	0.732069	1.63812e-11	0.362229	1.55625e-35	0.446401
GO_MITOCHONDRIAL_MEMBRANE_ORGANIZATION	0.0625709	0.103419	0.0134479	-0.0934502	0.327033	0.0545363	4.34035e-06	0.172776	0.660012	0.0244918	0.00458905	0.107096	0.905842	0.00658658	0.543044	0.023043
GO_POSITIVE_REGULATION_OF_NEUTROPHIL_MIGRATION	3.36534e-29	0.568354	2.60535e-52	0.531912	1.32373e-39	0.644913	1.09373e-77	0.627166	5.4716e-41	0.653663	7.79804e-110	0.713615	1.64499e-11	0.362198	3.3586e-30	0.413198
GO_INTRA_GOLGI_VESICLE_MEDIATED_TRANSPORT	2.17745e-05	-0.233163	4.00647e-05	-0.154686	0.000162801	-0.207675	1.60957e-25	-0.380637	2.47925e-07	-0.281463	1.7393e-20	-0.34094	7.37899e-08	-0.293071	4.31612e-22	-0.354218
GO_REGULATION_OF_SPINDLE_CHECKPOINT	0.0208752	0.128114	0.0152359	-0.0917576	0.0704296	0.100486	0.000556119	0.130249	0.0614478	0.103863	0.13784	0.0561818	0.526631	-0.0352461	0.721192	-0.0135215
GO_POSITIVE_REGULATION_OF_STRIATED_MUSCLE_CONTRACTION	0.373802	0.0494941	0.00901752	0.0987072	0.954764	0.00315875	0.000183713	0.14102	0.933	0.00468143	0.000230238	0.138888	0.340577	-0.0530315	0.0225818	0.0862477
GO_ANATOMICAL_STRUCTURE_REGRESSION	1.51834e-07	0.286223	3.22099e-09	0.221521	1.3932e-09	0.327873	3.27367e-06	0.174941	9.59537e-10	0.330924	5.01846e-10	0.232395	0.00164984	0.173899	0.0249032	0.0848332
GO_CEREBRAL_CORTEX_NEURON_DIFFERENTIATION	8.71653e-05	-0.215912	6.58573e-17	-0.308785	5.67906e-07	-0.273208	4.57599e-11	-0.245648	1.62875e-07	-0.285547	1.56416e-14	-0.285028	0.0776369	-0.0980223	1.29068e-05	-0.164147
GO_OVARIAN_FOLLICLE_DEVELOPMENT	3.48977e-09	0.320213	1.14939e-05	0.165086	2.40605e-09	0.323341	1.03269e-10	0.241232	6.27236e-12	0.369137	8.43914e-13	0.266163	0.0147953	0.1351	4.93148e-05	0.15289
GO_REGULATION_OF_VENTRICULAR_CARDIAC_MUSCLE_CELL_ACTION_POTENTIAL	0.0616481	0.103783	0.710733	0.0140521	0.00364297	0.160849	0.023221	-0.085846	0.0322563	0.11881	0.589066	-0.0204664	0.486254	-0.0387574	0.02595	-0.0842324
GO_REGULATION_OF_MYOBLAST_DIFFERENTIATION	0.00261801	0.166405	1.94635e-06	0.178865	0.000369818	0.196345	0.00297008	0.112212	0.00114442	0.179632	6.35932e-07	0.18703	0.249	0.064126	0.000344091	0.135015
GO_GLUCAN_METABOLIC_PROCESS	0.000482952	0.19252	1.72987e-10	0.238387	0.00173104	0.173133	9.64444e-08	0.20004	0.00671797	0.150078	7.61813e-13	0.266666	0.634055	0.0265027	2.02356e-06	0.178575
GO_CARDIAC_ATRIUM_DEVELOPMENT	0.0948408	-0.0928145	0.599987	-0.019869	0.033674	-0.117859	0.000707484	-0.127798	0.0806296	-0.0970536	0.0277018	-0.0832721	0.385265	-0.0483191	0.0078772	-0.100433
GO_NEGATIVE_REGULATION_OF_CELLULAR_RESPONSE_TO_GROWTH_FACTOR_STIMULUS	1.41864e-05	0.238235	3.64374e-08	0.206427	1.3326e-07	0.287475	0.000788807	0.126677	8.3393e-06	0.244374	6.12944e-11	0.244072	0.0573879	-0.105524	0.706664	0.0142593
GO_FATTY_ACID_HOMEOSTASIS	9.5932e-05	-0.214669	0.519495	-0.024403	1.35854e-05	-0.238741	0.00422656	-0.108079	1.92048e-05	-0.234661	0.128767	-0.0575086	3.78605e-06	-0.253211	0.450175	0.0286067
GO_NUCLEOTIDE_SUGAR_METABOLIC_PROCESS	7.82415e-17	0.440163	6.85459e-20	0.335847	3.08813e-23	0.513238	1.06525e-53	0.538011	1.26157e-18	0.462444	3.09775e-58	0.557107	0.00235701	0.168136	9.07503e-16	0.297668
GO_ENERGY_DERIVATION_BY_OXIDATION_OF_ORGANIC_COMPOUNDS	0.931051	0.00481791	9.41645e-05	-0.147165	0.0210645	-0.127926	0.00441164	0.107568	0.197775	-0.071625	0.808491	0.00918362	0.734709	0.018868	0.239157	0.0445795
GO_REGULATION_OF_PLATELET_AGGREGATION	0.000554719	0.190506	1.12215e-11	0.253078	5.95237e-07	0.272731	0.0357188	0.0794502	0.000732004	0.186413	1.17134e-06	0.182617	0.628954	0.0269019	0.00232017	0.115028
GO_POSITIVE_REGULATION_OF_PROTEIN_IMPORT_INTO_NUCLEUS_TRANSLOCATION	0.0116787	0.139731	0.00133356	0.121132	4.08707e-07	0.276516	0.102473	-0.0618167	0.00505471	0.155167	0.411662	0.0311002	0.298693	-0.0578212	0.00288511	-0.112547
GO_POSITIVE_REGULATION_OF_CARDIAC_MUSCLE_CONTRACTION	0.520757	-0.035748	0.769322	0.0111117	0.167385	-0.0767676	0.326271	-0.0371832	0.326521	-0.0545939	0.644221	-0.0174971	0.159614	-0.0781931	0.782825	-0.0104441
GO_REGULATION_OF_SUBSTRATE_ADHESION_DEPENDENT_CELL_SPREADING	4.18354e-16	0.430624	1.50735e-45	0.500296	1.96186e-22	0.50498	5.43574e-38	0.460541	7.19707e-19	0.465351	2.25222e-63	0.577339	0.000280884	0.200213	8.25396e-20	0.335149
GO_NEPHRIC_DUCT_DEVELOPMENT	0.0046069	0.156795	0.614638	-0.0190752	0.12336	0.0856424	0.00534718	-0.105247	0.0147114	0.135213	0.281642	-0.0407782	0.693972	-0.0219076	0.781481	0.0105103
GO_POST_GOLGI_VESICLE_MEDIATED_TRANSPORT	0.542621	-0.033894	0.67841	-0.01571	0.166048	0.0770094	1.5507e-09	-0.225862	0.438487	-0.0431216	9.00294e-07	-0.184531	0.000586226	-0.189697	1.70775e-11	-0.250883
GO_ERROR_FREE_TRANSLESION_SYNTHESIS	9.14984e-05	0.215284	0.000137891	0.143688	0.010345	0.142055	1.01813e-20	0.342904	0.00315878	0.163268	2.08911e-17	0.313505	0.0800301	0.0972453	0.000434997	0.132707
GO_EYE_PHOTORECEPTOR_CELL_DIFFERENTIATION	0.00623477	-0.151428	0.0351812	-0.0796822	0.0609056	-0.104079	1.96537e-15	-0.294299	0.00160118	-0.174375	2.75009e-12	-0.260279	0.131212	-0.0838986	0.000468128	-0.131977
GO_RESPONSE_TO_TESTOSTERONE	1.18157e-14	0.410667	2.31676e-09	0.223489	5.80723e-17	0.441828	9.82242e-14	0.276518	2.71096e-15	0.419625	5.8274e-18	0.318657	0.00133717	0.177214	0.000127998	0.144373
GO_CENTRIOLE_ASSEMBLY	0.755441	0.0173429	0.497213	-0.0257194	0.800292	0.0140858	0.0870341	-0.0647735	0.0969655	0.0922252	0.063746	-0.070162	0.00188718	0.171749	0.577228	0.0211197
GO_REGULATION_OF_HEMOPOIESIS	3.89088e-28	0.559245	1.25767e-76	0.623763	6.9614e-46	0.682456	1.2347e-65	0.585815	1.0896e-41	0.657987	3.98277e-109	0.712003	1.92258e-08	0.305377	3.91476e-32	0.425664
GO_ATRIAL_SEPTUM_DEVELOPMENT	0.0285213	-0.121499	0.14992	0.0545158	0.00241567	-0.167732	0.336021	-0.0364415	0.235415	-0.065999	0.575082	0.0212388	0.221845	0.0679477	0.185997	0.0500803
GO_DETECTION_OF_TEMPERATURE_STIMULUS	0.000946432	0.182543	2.82414e-05	-0.157665	0.0666617	0.101857	0.995954	0.000192165	0.0450078	0.111277	0.128035	-0.0576187	0.537906	-0.0342906	0.456713	-0.0281957
GO_ION_TRANSMEMBRANE_TRANSPORT	0.0334027	-0.118038	4.82636e-08	-0.204604	0.00795755	-0.146976	1.15923e-09	-0.227566	0.000164496	-0.207536	7.43037e-11	-0.243028	0.000306041	-0.199014	1.51705e-09	-0.225991
GO_ENAMEL_MINERALIZATION	0.00026775	0.200879	0.0125193	0.0944091	8.91297e-07	0.268602	0.994295	-0.000270921	0.00043862	0.193908	0.195329	0.0490387	0.940792	-0.00413596	0.168784	-0.0521075
GO_POSITIVE_REGULATION_OF_CALCIUM_MEDIATED_SIGNALING	2.49017e-05	0.231551	7.99912e-12	0.254832	2.27115e-07	0.28232	2.09501e-19	0.331626	1.4919e-07	0.286392	5.70228e-22	0.353239	0.00107423	0.180607	2.01408e-11	0.250015
GO_NEURAL_CREST_CELL_MIGRATION	0.00712867	-0.148997	0.000358369	-0.134617	0.00576223	-0.152842	1.57908e-12	-0.263061	0.00205313	-0.170387	4.56305e-12	-0.257712	0.00014753	-0.208995	1.63078e-05	-0.162237
GO_SPINAL_CORD_MOTOR_NEURON_CELL_FATE_SPECIFICATION	0.0418897	0.112934	0.868336	0.00628126	0.43902	0.0430714	0.561472	-0.0219992	0.126517	0.0849311	0.376798	-0.0334794	0.00121156	0.17875	0.22756	0.0456984
GO_REGULATION_OF_GLYCOPROTEIN_METABOLIC_PROCESS	6.68056e-10	0.333854	5.17641e-18	0.31913	2.47694e-13	0.391255	1.64866e-14	0.284788	6.22841e-11	0.352333	2.05747e-22	0.356805	0.118559	0.0867515	0.00284664	0.112701
GO_INTRACELLULAR_SIGNAL_TRANSDUCTION	0.000122821	0.21143	7.53964e-25	0.375658	1.61216e-07	0.285645	1.85434e-05	0.161179	0.000553488	0.190539	7.16683e-19	0.326902	0.471108	-0.0401145	0.0122629	0.0946849
GO_REGULATION_OF_BEHAVIOR	0.46361	-0.0407951	0.331633	-0.0367735	0.37456	-0.0494157	0.00169764	-0.118506	0.121391	-0.0860931	0.0698118	-0.0686208	0.0177684	-0.131422	0.00053758	-0.130591
GO_PYRIMIDINE_NUCLEOTIDE_METABOLIC_PROCESS	0.285238	0.0594534	0.00224065	0.115421	0.961743	-0.00267097	2.55984e-22	0.356045	0.805611	0.0137029	1.06529e-17	0.316235	0.648497	0.0253798	1.37355e-11	0.252024
GO_GLYCOLIPID_CATABOLIC_PROCESS	1.52414e-18	0.461458	6.58663e-25	0.376097	2.13752e-31	0.586327	1.36245e-37	0.458289	5.02251e-18	0.455166	7.64088e-40	0.470778	0.000942159	0.182612	4.61334e-08	0.204898
GO_SYNAPTIC_VESICLE_ENDOCYTOSIS	9.96467e-07	-0.267449	9.98127e-09	-0.214621	1.7968e-07	-0.284598	9.7822e-19	-0.325694	3.93445e-07	-0.276896	9.56992e-18	-0.316667	0.000234157	-0.202732	2.47452e-06	-0.177064
GO_POSITIVE_REGULATION_OF_PROTEIN_TYROSINE_KINASE_ACTIVITY	0.594883	-0.0296051	0.00287907	0.112571	0.606519	0.0286744	0.309766	-0.0384724	0.174981	-0.0754213	0.587627	0.0205455	0.0183267	-0.130792	0.0451451	-0.0757984
GO_POSITIVE_REGULATION_OF_HEART_RATE	0.172665	-0.0758271	4.20115e-05	-0.154277	0.00742682	-0.148247	0.00137627	-0.120792	0.0927344	-0.0934092	8.24771e-05	-0.148355	0.0112728	-0.140412	2.85749e-10	-0.235583
GO_PALATE_DEVELOPMENT	0.834199	0.0116555	0.44071	0.0292077	0.234654	-0.0661063	0.0160414	-0.0910516	0.44011	-0.042969	0.636908	-0.0178842	0.0429037	-0.112384	0.158402	-0.0534063
GO_INNATE_IMMUNE_RESPONSE_ACTIVATING_CELL_SURFACE_RECEPTOR_SIGNALING_PATHWAY	2.15568e-15	0.420995	2.95476e-19	0.330313	1.99644e-19	0.471893	2.9443e-52	0.531676	2.55931e-16	0.433451	2.7802e-57	0.553196	0.0149708	0.134866	1.5466e-18	0.323905
GO_PATTERNING_OF_BLOOD_VESSELS	1.51709e-19	0.473275	7.67605e-30	0.410824	2.03482e-24	0.52499	2.31035e-33	0.433325	9.83198e-26	0.537565	1.25655e-47	0.510374	4.37128e-05	0.224663	2.2032e-11	0.249542
GO_REGULATION_OF_HOMEOSTATIC_PROCESS	0.000280636	0.200225	0.000176213	0.141411	4.34655e-07	0.275901	0.0315347	0.0813411	0.000335495	0.197723	5.65273e-05	0.151699	0.104715	-0.0901592	0.234838	-0.0449916
GO_FATTY_ACID_BETA_OXIDATION_USING_ACYL_COA_OXIDASE	6.40498e-05	0.219862	3.05691e-12	0.259745	0.000312547	0.198719	8.13704e-09	0.215885	4.07677e-05	0.225528	3.60671e-15	0.291621	0.0185752	0.130517	6.24185e-12	0.256109
GO_POSITIVE_REGULATION_OF_VASOCONSTRICTION	2.16094e-08	0.30433	7.89342e-19	0.326528	4.64169e-10	0.33677	2.45628e-15	0.293319	4.07575e-10	0.337804	5.03594e-29	0.405351	0.0300633	0.120355	4.44456e-08	0.20514
GO_GOLGI_TO_PLASMA_MEMBRANE_TRANSPORT	0.0503888	-0.108633	0.00183997	-0.117618	0.550596	-0.0332271	5.04179e-17	-0.309891	0.0470017	-0.110268	1.79848e-15	-0.294688	0.00364858	-0.160823	3.98777e-16	-0.301204
GO_PROTEIN_TARGETING_TO_MEMBRANE	0.397918	-0.0470466	0.0060238	-0.103787	0.272646	-0.0610284	0.0537963	0.0729749	0.389861	-0.0478541	0.688785	0.0151747	0.898733	-0.00708642	0.424074	0.0302823
GO_MITOTIC_CELL_CYCLE	0.843861	0.0109672	0.110422	0.0604305	0.978759	0.00148256	2.48552e-05	0.15874	0.832172	-0.0118001	4.49112e-05	0.153701	0.180846	-0.0744111	0.954227	0.00217492
GO_REGULATION_OF_FEEDING_BEHAVIOR	0.0302811	0.120197	0.000560941	0.130162	0.0924153	0.0935002	7.11896e-05	0.149666	0.102439	0.0907531	1.87447e-09	0.224745	0.344077	0.0526489	0.104105	0.0615253
GO_REGULATION_OF_THYMOCYTE_AGGREGATION	6.12433e-07	0.272442	0.000466759	0.132006	2.43094e-07	0.281655	6.93311e-06	0.169121	4.51166e-07	0.275527	4.55171e-09	0.219435	0.354289	-0.0515465	0.0492414	0.0744097
GO_PROTEIN_COMPLEX_BIOGENESIS	9.50785e-05	0.214785	0.0840299	0.0653972	0.000928076	0.182841	1.14031e-14	0.286463	0.0064387	0.150847	8.92963e-12	0.254263	0.105884	-0.0898581	0.0474816	0.074994
GO_REGULATION_OF_MULTICELLULAR_ORGANISM_GROWTH	1.73806e-06	-0.261616	5.81744e-05	-0.151447	3.15173e-06	-0.255217	3.49636e-27	-0.392626	1.21281e-06	-0.265405	6.72137e-19	-0.327151	0.000589701	-0.189611	1.88281e-10	-0.237916
GO_REGULATION_OF_KIDNEY_DEVELOPMENT	4.91726e-05	0.223195	1.31419e-16	0.305903	3.38389e-05	0.227823	2.09532e-13	0.272921	4.90967e-08	0.29686	1.93157e-24	0.372582	7.64392e-06	0.245365	6.72772e-10	0.230716
GO_MACROMOLECULAR_COMPLEX_DISASSEMBLY	0.776446	-0.0158108	1.37193e-08	-0.212639	0.0925807	-0.093453	0.010035	0.097324	0.434178	-0.0435282	0.356249	-0.0349454	0.918775	-0.00567852	0.596759	-0.020045
GO_POSITIVE_REGULATION_OF_CELLULAR_COMPONENT_BIOGENESIS	0.797809	-0.0142648	0.311239	0.0383555	0.576915	0.0310587	9.93088e-06	-0.166263	0.819994	-0.0126707	0.0875933	-0.0646594	0.000538797	-0.190931	0.000794764	-0.126599
GO_POSITIVE_REGULATION_OF_MITOCHONDRIAL_MEMBRANE_PERMEABILITY	0.0671389	0.10168	0.000304362	-0.136208	0.0888047	0.0945481	0.0579961	0.071739	0.200993	0.0711151	0.921154	0.00375049	0.589598	-0.0300305	0.00381092	-0.109306
GO_COMPLEMENT_ACTIVATION	1.99926e-26	0.54397	1.40945e-55	0.546067	3.235e-39	0.642406	2.71273e-72	0.609406	3.94814e-40	0.64827	5.18733e-99	0.687695	4.65289e-14	0.402079	2.45994e-42	0.484029
GO_REGULATION_OF_CATECHOLAMINE_SECRETION	2.32129e-07	-0.282107	1.65944e-10	-0.238617	5.10466e-08	-0.2965	1.48298e-15	-0.295532	6.97232e-07	-0.271122	1.26868e-15	-0.296213	0.0011372	-0.17973	5.93307e-08	-0.203254
GO_BONE_DEVELOPMENT	2.35788e-05	0.232208	3.89929e-17	0.31095	1.18755e-09	0.329184	0.00118052	0.122439	1.25857e-07	0.288021	4.19403e-14	0.280496	0.173229	0.0757279	2.8959e-07	0.192564
GO_NEGATIVE_REGULATION_OF_INTRACELLULAR_STEROID_HORMONE_RECEPTOR_SIGNALING_PATHWAY	0.798523	-0.0142133	0.0672447	0.0692591	0.374023	0.0494712	0.826474	0.00830661	0.81276	-0.0131892	0.222501	0.0461991	0.00420534	-0.158381	0.00026401	-0.13758
GO_DERMATAN_SULFATE_PROTEOGLYCAN_METABOLIC_PROCESS	0.157012	-0.0786821	0.572526	-0.021381	0.132858	-0.0835435	0.551472	-0.0225635	0.420827	-0.0448029	0.572586	-0.0213776	0.0746695	-0.0990131	0.21442	-0.0470162
GO_REGULATION_OF_BIOMINERAL_TISSUE_DEVELOPMENT	2.518e-05	0.231417	1.91715e-12	0.262092	2.52919e-07	0.281267	7.71527e-05	0.148951	1.58336e-06	0.262603	4.66303e-13	0.269064	0.276583	0.0605308	0.00130085	0.1214
GO_REGULATION_OF_AMINE_TRANSPORT	6.60977e-06	-0.247009	2.43284e-09	-0.223198	9.32033e-08	-0.290874	2.00565e-12	-0.261866	9.20487e-07	-0.268269	6.54189e-13	-0.267413	0.00443849	-0.157444	7.56824e-09	-0.216331
GO_SMOOTH_MUSCLE_TISSUE_DEVELOPMENT	3.98647e-05	0.225805	4.1444e-06	0.173133	1.60853e-06	0.262436	0.107146	0.060992	8.36826e-06	0.244334	5.15258e-05	0.152508	0.709761	0.0207223	0.332483	-0.036709
GO_NEGATIVE_REGULATION_OF_HEMATOPOIETIC_PROGENITOR_CELL_DIFFERENTIATION	0.096505	0.092352	0.000434222	0.132725	0.457053	0.0413953	2.6061e-13	0.271875	0.0424034	0.112654	5.04697e-12	0.257197	0.164408	0.0773079	3.20026e-05	0.156606
GO_NEGATIVE_REGULATION_OF_NUCLEOSIDE_METABOLIC_PROCESS	0.423778	0.0445191	0.0242036	0.085247	0.100099	0.0913746	0.0543167	-0.0728175	0.607256	0.0286157	0.437384	-0.0294207	0.207253	-0.0701404	0.230339	0.0454267
GO_NEGATIVE_REGULATION_OF_CATION_CHANNEL_ACTIVITY	0.135792	0.0829185	0.000244327	-0.138322	0.483083	0.0390396	0.0248443	0.0848676	0.229911	0.0667796	0.470871	0.0273169	0.968397	0.00220613	0.120732	-0.0587454
GO_NCRNA_PROCESSING	0.598838	-0.0292879	6.77706e-05	-0.150102	0.196711	-0.0717948	0.162344	0.0529059	0.558221	-0.0325938	0.48079	-0.0267098	0.691395	-0.022102	0.764391	0.0113564
GO_NEGATIVE_REGULATION_OF_TRANSPORT	2.29402e-06	0.258653	8.29704e-11	0.242428	3.28998e-08	0.30053	1.50414e-09	0.226041	3.08687e-06	0.255444	4.77742e-16	0.300432	0.714675	0.0203553	0.0111941	0.0958928
GO_THYMOCYTE_AGGREGATION	3.38834e-26	0.541864	6.45884e-63	0.575593	7.30699e-40	0.646567	2.29122e-60	0.565668	2.31926e-42	0.662067	2.43729e-92	0.670231	1.2434e-15	0.424261	7.57509e-27	0.390245
GO_LEYDIG_CELL_DIFFERENTIATION	0.0567294	-0.105803	0.138026	-0.0561554	0.596032	-0.0295128	0.098486	-0.0625441	0.0458033	-0.11087	0.0685294	-0.0689372	0.00284084	-0.165047	0.205788	-0.0479138
GO_AMINE_METABOLIC_PROCESS	8.60345e-09	0.31247	8.57915e-13	0.266082	1.85604e-12	0.377669	6.23533e-11	0.243979	1.52889e-11	0.362731	2.50703e-13	0.272061	2.4746e-06	0.257838	8.09749e-10	0.229648
GO_DNA_MODIFICATION	0.568282	-0.0317647	0.00228071	-0.115222	0.76628	0.0165508	1.07728e-07	-0.1993	0.408149	-0.0460354	5.64298e-09	-0.218129	0.656724	0.0247447	0.216275	-0.0468267
GO_PROTEIN_LOCALIZATION_TO_MEMBRANE	0.112624	-0.088172	0.000654973	-0.128588	0.0669069	-0.101766	0.385276	0.0328889	0.0755283	-0.0987231	0.625	-0.0185188	0.849025	-0.0106	0.811	-0.00906099
GO_RNA_SURVEILLANCE	0.656488	0.0247629	4.59552e-05	-0.153502	0.790443	-0.0147966	0.899064	0.00480623	0.106792	0.0896261	0.0408185	-0.0773854	0.0587827	0.104943	0.378995	0.0333256
GO_MITOTIC_SPINDLE_ASSEMBLY	0.00774099	0.147485	0.000140982	0.143484	0.000348922	0.197169	0.00549988	0.104903	0.00993513	0.142823	0.00015344	0.1427	0.503172	-0.0372683	0.344426	-0.035813
GO_REGULATION_OF_GRANULOCYTE_DIFFERENTIATION	2.25207e-12	0.37633	3.27642e-48	0.513145	1.58471e-20	0.484418	2.40249e-30	0.414154	4.46001e-17	0.443295	5.6454e-56	0.547744	0.000850435	0.184163	1.65079e-23	0.36544
GO_RESPONSE_TO_ALKALOID	0.576595	-0.0310849	0.285454	-0.0404569	0.217453	-0.0685964	0.0432911	-0.076462	0.13096	-0.0839535	0.444718	-0.0289524	0.00722857	-0.148743	0.0182526	-0.089262
GO_REGULATION_OF_MESENCHYMAL_CELL_PROLIFERATION	0.849008	0.0106012	0.0106149	0.0965906	0.803775	0.013835	0.307851	-0.0386249	0.109341	0.0889831	0.265812	0.0421452	0.469336	0.0402748	0.843632	-0.00747396
GO_MORPHOGENESIS_OF_AN_EPITHELIAL_FOLD	0.000840578	0.184339	2.40327e-11	0.249082	0.000893267	0.183421	2.93049e-06	0.175784	5.46419e-05	0.221871	1.18896e-12	0.264471	0.0867172	0.0951696	0.0194067	0.0884021
GO_AUTOPHAGY	0.0106724	0.141461	0.0169333	0.0903052	0.000721931	0.186619	2.2099e-13	0.272666	0.188319	0.0731586	3.79665e-12	0.258647	0.117766	-0.0869379	0.00308763	0.111764
GO_REGULATION_OF_CELL_PROJECTION_ORGANIZATION	0.00132132	-0.1774	0.000211821	-0.139679	0.00199502	-0.170852	2.94789e-16	-0.302492	0.000160271	-0.207886	1.06444e-12	-0.265018	3.62153e-06	-0.253699	8.03414e-10	-0.229694
GO_REGULATION_OF_ACTIN_FILAMENT_LENGTH	2.18001e-12	0.376556	4.72192e-40	0.471912	7.74456e-18	0.452848	2.90832e-23	0.363524	9.64155e-14	0.397412	1.66272e-46	0.504979	0.0568731	0.105742	1.74936e-10	0.238325
GO_REGULATION_OF_TRANSPORTER_ACTIVITY	1.20258e-05	-0.240162	5.00845e-08	-0.204362	8.03075e-05	-0.21697	5.31334e-18	-0.319025	3.19386e-06	-0.255073	3.20279e-16	-0.302139	3.22609e-05	-0.228408	1.38653e-09	-0.226519
GO_EATING_BEHAVIOR	0.054823	0.106625	0.000158512	-0.142398	0.48005	0.0393104	0.849835	0.00717384	0.61809	0.0277567	0.520727	-0.0243311	0.685201	-0.0225703	0.0034483	-0.11048
GO_GLUTATHIONE_DERIVATIVE_METABOLIC_PROCESS	1.57827e-05	0.236983	6.11615e-05	0.151007	5.75226e-05	0.221223	1.21484e-14	0.286176	2.01579e-07	0.283482	2.61851e-12	0.260527	1.79708e-07	0.284597	1.64119e-10	0.238679
GO_CELL_JUNCTION_ORGANIZATION	4.45531e-09	0.318138	4.96542e-16	0.300266	2.54029e-11	0.359016	6.64237e-06	0.169458	5.47724e-10	0.335449	7.19037e-16	0.298674	0.479861	0.0393274	0.00414499	0.108311
GO_FOLIC_ACID_CONTAINING_COMPOUND_BIOSYNTHETIC_PROCESS	0.616556	0.0278779	0.000624563	0.129073	0.353015	-0.0516829	1.44905e-09	0.22626	0.493315	0.0381326	1.26906e-10	0.240099	0.332982	0.0538705	4.76713e-05	0.153184
GO_EMBRYONIC_HEART_TUBE_DEVELOPMENT	0.00500853	0.155328	1.01276e-06	0.183678	0.153377	0.0793757	0.017591	0.0897766	0.00145996	0.175835	4.94181e-07	0.188822	0.879008	0.00847651	0.00133016	0.12116
GO_SPHINGOID_METABOLIC_PROCESS	0.0342829	0.117461	3.02843e-07	0.192253	0.000499746	0.192025	0.0282333	0.0829912	0.0132851	0.137224	0.000701846	0.127881	0.712496	-0.0205179	0.200096	-0.0485206
GO_PROTEIN_DESTABILIZATION	0.870937	-0.00904681	0.210741	-0.0473954	0.686055	0.0225057	0.889176	-0.00527998	0.631065	-0.0267365	0.987313	0.000602505	0.197737	-0.0716311	0.00358389	-0.110028
GO_NEGATIVE_REGULATION_OF_RESPONSE_TO_FOOD	5.33872e-06	-0.249406	0.0004316	-0.132785	2.57293e-08	-0.302759	0.00956143	-0.0979515	7.6054e-05	-0.217669	0.00034283	-0.135051	0.923758	-0.00532901	0.669238	0.0161858
GO_L_AMINO_ACID_IMPORT	0.000373883	-0.196189	0.00027496	-0.137189	3.20149e-07	-0.278945	1.14323e-17	-0.31595	2.25637e-07	-0.282384	6.71363e-15	-0.28885	1.59788e-05	-0.236838	1.84425e-06	-0.179267
GO_EAR_DEVELOPMENT	0.313623	0.0560664	0.403006	0.0316792	0.543215	0.0338442	0.000351763	-0.134799	0.13096	0.0839535	0.194185	-0.0491644	0.251321	0.0638133	0.781248	0.0105219
GO_NEGATIVE_REGULATION_OF_CELL_MATRIX_ADHESION	0.210594	0.0696288	0.572346	0.021391	0.0890633	0.0944719	0.00400823	-0.108709	0.961042	-0.00271994	0.153194	-0.054082	6.59387e-05	-0.219493	0.00051238	-0.131074
GO_REGULATION_OF_MACROPHAGE_CHEMOTAXIS	8.74183e-21	0.487286	2.24091e-47	0.509174	1.40238e-31	0.587775	9.2296e-51	0.524957	6.23159e-29	0.566087	8.0396e-79	0.630757	2.2185e-09	0.324019	4.9236e-29	0.405417
GO_LAGGING_STRAND_ELONGATION	8.72538e-05	-0.215899	2.30115e-05	-0.159385	2.4017e-05	-0.231986	2.10801e-05	-0.160116	4.03279e-05	-0.225662	3.6111e-07	-0.191028	0.0870504	-0.0950696	9.14361e-07	-0.184419
GO_POSITIVE_REGULATION_OF_SMOOTH_MUSCLE_CELL_PROLIFERATION	5.26782e-18	0.454911	8.49321e-49	0.515902	1.0572e-24	0.527752	2.58857e-32	0.426796	3.17763e-20	0.481029	3.19994e-61	0.569033	4.3528e-05	0.224715	2.17583e-18	0.322564
GO_MEMBRANE_BUDDING	4.06386e-09	0.318921	0.0107086	0.0964755	1.00183e-09	0.330573	1.5369e-15	0.295376	8.47658e-06	0.244188	5.31112e-15	0.289898	0.216206	-0.0687824	0.867353	0.00632861
GO_REGULATION_OF_SYNAPTIC_PLASTICITY	1.37153e-13	-0.395127	1.00538e-24	-0.37472	7.77401e-15	-0.413242	1.3225e-36	-0.452645	1.91872e-17	-0.447935	2.80248e-39	-0.467695	3.02979e-11	-0.357715	1.34475e-25	-0.381211
GO_LONG_TERM_SYNAPTIC_DEPRESSION	1.53434e-05	-0.237315	2.54487e-11	-0.248779	0.000179907	-0.206328	6.69783e-16	-0.29898	3.02065e-08	-0.301307	1.77391e-15	-0.294748	2.90059e-08	-0.301675	1.24947e-13	-0.275381
GO_GLYCOSYLCERAMIDE_METABOLIC_PROCESS	0.461715	-0.040968	0.0977565	0.0626798	0.132984	0.0835163	0.3754	0.0335775	0.502342	-0.0373407	0.692096	0.0150046	0.0669463	-0.101751	0.579643	-0.0209859
GO_CELLULAR_RESPONSE_TO_RETINOIC_ACID	0.00624082	0.15141	4.90509e-05	0.152937	0.00656709	0.15049	0.36654	0.0342048	0.00167853	0.173625	0.00183857	0.117627	0.857761	0.0099798	0.937081	-0.00299109
GO_NCRNA_TRANSCRIPTION	0.750899	-0.0176759	0.268759	-0.0418865	0.541426	-0.0339944	0.0863285	0.0649184	0.536556	-0.0344045	0.349308	0.0354526	0.313103	-0.0561266	0.268812	-0.0418819
GO_REGULATION_OF_INTERLEUKIN_1_BETA_PRODUCTION	1.90785e-31	0.586718	3.71694e-73	0.612326	3.49479e-48	0.694923	1.36166e-74	0.617116	5.93866e-48	0.693703	3.39358e-112	0.718911	1.10015e-12	0.381258	7.71578e-41	0.476142
GO_NEGATIVE_REGULATION_OF_SMOOTH_MUSCLE_CELL_MIGRATION	0.00758023	0.147872	2.27694e-18	0.322385	0.00154726	0.174918	3.85925e-19	0.32929	0.0154576	0.134228	4.15964e-31	0.419112	0.124327	-0.085423	1.60134e-07	0.196628
GO_NEGATIVE_REGULATION_OF_INTRINSIC_APOPTOTIC_SIGNALING_PATHWAY	1.81135e-12	0.377837	2.14894e-09	0.223935	7.12416e-15	0.413776	7.01893e-29	0.404374	2.17409e-13	0.392114	7.38558e-27	0.390324	0.250763	0.0638882	6.31126e-09	0.217445
GO_LIPOXYGENASE_PATHWAY	1.70519e-12	0.378253	8.78714e-29	0.403712	3.08535e-17	0.445331	9.61288e-41	0.475632	8.53554e-16	0.426474	1.02248e-49	0.520175	1.21539e-08	0.309445	4.40254e-28	0.398914
GO_NEGATIVE_REGULATION_OF_EPITHELIAL_CELL_APOPTOTIC_PROCESS	2.83059e-10	0.340683	2.1046e-32	0.427361	3.17225e-14	0.404504	3.41377e-29	0.406491	2.72439e-08	0.302242	4.19354e-45	0.498097	0.625673	-0.0271594	4.70546e-10	0.232762
GO_VESICLE_DOCKING_INVOLVED_IN_EXOCYTOSIS	0.00582193	-0.152657	0.00509594	-0.105832	0.0420018	-0.112873	8.67609e-05	-0.147901	0.0011567	-0.179467	8.95137e-05	-0.147621	0.00113675	-0.179736	9.25423e-08	-0.200315
GO_CD4_POSITIVE_ALPHA_BETA_T_CELL_ACTIVATION	3.62706e-16	0.431448	8.9599e-38	0.459318	2.18665e-27	0.552648	3.40449e-45	0.498547	1.01874e-18	0.463555	8.04567e-60	0.5635	0.000292288	0.199657	5.87428e-19	0.327672
GO_ARTERY_MORPHOGENESIS	8.14836e-06	0.244638	9.95101e-05	0.146667	7.50989e-07	0.270362	0.00132541	0.121198	1.2019e-06	0.265499	6.27729e-06	0.169903	0.287299	0.0592	0.166984	0.0523283
GO_NEGATIVE_REGULATION_OF_DEFENSE_RESPONSE_TO_VIRUS	4.02766e-12	0.372269	6.62504e-30	0.411249	7.40613e-15	0.413539	1.13264e-18	0.325123	2.66991e-14	0.405589	5.12622e-26	0.384271	0.000352827	0.197011	2.54675e-09	0.222925
GO_POSITIVE_REGULATION_OF_MOLECULAR_FUNCTION	3.43537e-07	0.278246	7.58351e-26	0.383033	2.36579e-12	0.375988	4.51872e-07	0.189454	3.05284e-08	0.301211	6.33245e-21	0.344633	0.626535	0.0270917	0.000361219	0.13454
GO_POSITIVE_REGULATION_OF_REGULATED_SECRETORY_PATHWAY	0.00156286	0.174759	0.000765437	0.126988	0.00312051	0.163473	0.000195503	0.140436	0.0297172	0.120607	4.22503e-07	0.189927	0.290758	-0.0587776	0.618605	0.0188617
GO_SPROUTING_ANGIOGENESIS	6.70203e-07	0.271525	0.0891052	0.0643536	1.46005e-05	0.237898	2.46714e-06	0.177087	1.79417e-07	0.284612	1.58064e-07	0.196716	0.458901	-0.0412257	0.752859	-0.0119305
GO_LYMPHOCYTE_ACTIVATION	3.04012e-33	0.600617	9.53596e-82	0.639812	8.06132e-56	0.732199	1.69171e-80	0.635984	3.55931e-48	0.694881	1.07071e-123	0.743065	1.1732e-11	0.36465	4.10937e-37	0.45556
GO_METALLO_SULFUR_CLUSTER_ASSEMBLY	0.0795917	-0.0973862	3.47193e-06	-0.174492	0.0903146	-0.0941058	0.0870826	0.0647636	0.627238	-0.0270365	0.346498	-0.0356597	0.0226032	0.126455	0.310594	0.0384067
GO_NEGATIVE_REGULATION_OF_RETINOIC_ACID_RECEPTOR_SIGNALING_PATHWAY	0.00414153	0.158645	6.11681e-06	0.170106	0.00687316	0.149663	0.0118548	0.0951347	3.20971e-06	0.255019	1.99466e-05	0.160575	0.000558519	0.190406	0.043622	0.0763418
GO_SPLICEOSOMAL_TRI_SNRNP_COMPLEX_ASSEMBLY	0.0097653	-0.143149	5.03572e-09	-0.218822	0.00403922	-0.159077	6.56282e-10	-0.230859	0.00016906	-0.207168	2.13951e-11	-0.249697	0.094251	-0.0929799	0.00252807	-0.114057
GO_REGULATION_OF_T_CELL_TOLERANCE_INDUCTION	3.77758e-19	0.468657	1.93761e-56	0.549692	1.12717e-31	0.588523	8.63964e-48	0.511149	3.77585e-25	0.532045	1.68153e-66	0.588995	8.97777e-07	0.268527	1.24091e-18	0.324767
GO_POSITIVE_REGULATION_OF_RESPONSE_TO_OXIDATIVE_STRESS	0.358754	-0.0510707	0.0865935	-0.0648639	0.164931	-0.0772124	0.513552	-0.0247512	0.492278	0.0382241	0.922059	0.00370729	0.802278	0.0139427	0.000189881	0.14071
GO_PROTEIN_TRIMERIZATION	5.89086e-20	0.477991	2.86444e-37	0.456455	7.76273e-25	0.529047	4.99031e-55	0.543735	4.65612e-21	0.490294	2.7615e-68	0.595442	0.000166173	0.207399	3.58539e-18	0.32059
GO_REGULATION_OF_PEPTIDYL_SERINE_PHOSPHORYLATION	0.000424616	0.194374	3.74961e-17	0.311111	9.17867e-07	0.268299	9.28718e-05	0.14729	0.00113405	0.179773	1.63321e-15	0.29511	0.169077	-0.0764639	0.000180659	0.141178
GO_PROTEOGLYCAN_METABOLIC_PROCESS	6.13073e-06	0.247856	2.07424e-12	0.261698	1.91033e-07	0.284004	4.26395e-06	0.172913	6.14352e-06	0.247833	2.95157e-14	0.28212	0.77049	-0.016244	0.000577023	0.129876
GO_NITROGEN_COMPOUND_TRANSPORT	8.17802e-07	-0.269488	2.20477e-13	-0.272677	3.69992e-07	-0.277509	7.32852e-18	-0.317739	5.43747e-12	-0.37015	7.66653e-21	-0.343938	1.35933e-10	-0.346388	1.30167e-23	-0.36624
GO_DOPAMINE_METABOLIC_PROCESS	0.659411	0.024538	0.0920419	-0.0637714	0.380637	-0.0487909	0.0363106	-0.0791982	0.733266	0.0189747	0.21667	-0.0467865	0.157112	-0.0786633	0.0600262	-0.071168
GO_DEFENSE_RESPONSE_TO_OTHER_ORGANISM	7.9012e-32	0.589735	1.86769e-69	0.59959	1.7725e-43	0.668708	4.9826e-82	0.640669	1.25117e-41	0.657619	2.91648e-114	0.723447	1.86149e-11	0.361296	3.50948e-35	0.444313
GO_POSITIVE_REGULATION_OF_GLYCOGEN_METABOLIC_PROCESS	0.82556	-0.0122724	0.00875026	0.0990935	0.88155	0.0082971	0.711986	-0.0139884	0.475161	-0.039749	0.0603597	0.0710758	0.231972	-0.0664858	0.00551593	0.104868
GO_LEUKOCYTE_PROLIFERATION	3.00957e-27	0.551411	8.63819e-72	0.607691	1.025e-47	0.69244	3.47815e-67	0.591485	1.30178e-36	0.624954	2.19977e-103	0.698506	6.3107e-07	0.272138	5.04377e-30	0.412033
GO_POSITIVE_REGULATION_OF_MICROTUBULE_POLYMERIZATION_OR_DEPOLYMERIZATION	4.09235e-08	-0.298536	2.03716e-15	-0.294142	5.59913e-08	-0.295644	5.00825e-33	-0.43125	1.46462e-11	-0.363043	1.22346e-32	-0.428836	5.66283e-07	-0.273237	4.54451e-23	-0.362005
GO_L_ASCORBIC_ACID_METABOLIC_PROCESS	0.00119868	0.178916	0.00044097	0.132572	0.000221415	0.2035	8.97037e-10	0.229056	0.000207649	0.204379	1.63536e-09	0.22555	0.961699	0.00267407	0.000138879	0.143623
GO_CEREBELLAR_GRANULAR_LAYER_DEVELOPMENT	2.15371e-17	-0.447304	4.60463e-29	-0.405614	5.16836e-21	-0.489797	1.55188e-46	-0.505124	1.01092e-25	-0.537452	1.10869e-53	-0.537935	2.45179e-12	-0.37574	2.67406e-30	-0.413849
GO_REGULATION_OF_GENE_EXPRESSION_BY_GENETIC_IMPRINTING	3.5673e-05	-0.227175	0.411233	0.0311287	0.13186	-0.0837584	7.36871e-11	-0.243074	0.000283134	-0.200101	5.84934e-07	-0.187626	2.20749e-05	-0.232999	9.13241e-07	-0.184428
GO_ADHERENS_JUNCTION_ASSEMBLY	0.0105351	0.141708	3.78241e-07	0.190703	6.23611e-05	0.220201	0.0888671	-0.0644015	0.0212185	0.127775	0.0448392	0.0759063	0.600356	-0.0291663	0.0431359	0.0765187
GO_SECRETORY_GRANULE_ORGANIZATION	8.6771e-10	0.331741	1.95298e-13	0.273257	1.87621e-17	0.448057	4.6506e-07	0.189251	8.81486e-12	0.366707	1.54849e-12	0.263158	0.0730476	0.0995683	0.0907544	0.0640248
GO_NEGATIVE_REGULATION_OF_POTASSIUM_ION_TRANSPORT	0.00610499	-0.151806	0.000217689	-0.13942	0.0178472	-0.131332	0.00162487	-0.118986	0.00116019	-0.179421	9.99136e-05	-0.14663	0.000168752	-0.207192	0.00014568	-0.143181
GO_POSITIVE_REGULATION_OF_INTERLEUKIN_12_PRODUCTION	2.27658e-27	0.552492	1.25271e-60	0.566704	6.34125e-40	0.64696	1.9328e-55	0.545487	1.24635e-36	0.625085	8.07871e-78	0.627585	5.56801e-12	0.369982	1.19926e-29	0.409535
GO_REGULATION_OF_T_CELL_APOPTOTIC_PROCESS	4.4045e-30	0.575712	2.20764e-65	0.584881	3.22271e-47	0.689768	1.57927e-83	0.645178	5.27464e-41	0.653762	7.33799e-110	0.713675	1.69229e-10	0.344696	1.03268e-36	0.453264
GO_VESICLE_FUSION_TO_PLASMA_MEMBRANE	0.499877	0.0375562	0.0417245	0.0770417	0.319743	0.0553629	5.1021e-10	0.2323	0.175178	0.0753871	7.37756e-09	0.216488	0.71367	0.0204303	0.000797777	0.12656
GO_VENTRICULAR_CARDIAC_MUSCLE_TISSUE_DEVELOPMENT	1.2672e-05	-0.239553	4.94475e-08	-0.204446	4.0123e-07	-0.276701	7.8452e-17	-0.308058	8.90987e-07	-0.268606	2.64404e-15	-0.292994	1.17805e-07	-0.288652	5.05619e-07	-0.18866
GO_CELLULAR_RESPONSE_TO_INTERFERON_GAMMA	4.18542e-28	0.558969	7.34849e-68	0.593919	1.87916e-42	0.662617	1.57889e-65	0.58542	5.71601e-42	0.659696	2.009e-96	0.681064	4.56967e-16	0.430113	1.96013e-35	0.44581
GO_NEGATIVE_REGULATION_OF_HISTONE_METHYLATION	0.00495156	-0.15553	0.0199699	-0.0879986	0.019651	-0.129363	1.63146e-07	-0.196502	0.00127024	-0.178015	5.23836e-07	-0.188409	0.00862831	-0.145473	0.102513	-0.0618095
GO_REGULATION_OF_GLIAL_CELL_PROLIFERATION	1.80529e-05	0.235396	3.24638e-36	0.450386	2.78307e-11	0.358343	1.56936e-15	0.295285	2.34572e-10	0.342156	3.34284e-32	0.426097	0.00052931	0.19119	1.79256e-12	0.262428
GO_IN_UTERO_EMBRYONIC_DEVELOPMENT	5.19385e-05	0.222509	7.3013e-10	0.230246	0.00021199	0.204096	0.000622626	0.129104	0.00456164	0.156967	3.02037e-10	0.235272	0.121268	-0.0861214	0.542044	0.0231002
GO_NEGATIVE_REGULATION_OF_BLOOD_CIRCULATION	0.0130446	0.137582	0.0037913	0.109367	0.0844275	0.0958654	0.179221	-0.050861	0.270961	0.0612429	0.294696	0.0396897	0.148874	-0.0802521	0.000746716	-0.127243
GO_ER_NUCLEUS_SIGNALING_PATHWAY	0.000555264	0.190492	6.06641e-09	0.217687	0.00063271	0.188575	4.42845e-17	0.310426	0.0316001	0.119263	8.27127e-21	0.343662	0.00981744	-0.143048	0.556903	-0.0222564
GO_ETHANOL_METABOLIC_PROCESS	0.0165961	-0.132803	0.217762	0.0466756	0.0110371	-0.140818	0.998742	-5.97e-05	0.00480531	-0.156056	0.742666	0.0124402	0.260181	-0.0626371	0.357198	0.0348766
GO_DICARBOXYLIC_ACID_BIOSYNTHETIC_PROCESS	0.0486328	0.109468	0.852077	0.00706546	0.0547668	0.106649	0.981314	-0.000887495	0.0512878	0.108214	0.328803	0.0369893	0.32494	0.0547723	0.941865	0.00276325
GO_PROTEIN_HETEROTRIMERIZATION	8.14338e-11	0.350305	2.14368e-11	0.249687	1.03935e-13	0.396926	1.04414e-18	0.32544	5.13946e-10	0.335958	2.67499e-22	0.355891	0.157765	0.0785401	0.000443017	0.132526
GO_VESICLE_CYTOSKELETAL_TRAFFICKING	0.341938	-0.0528825	4.30035e-05	-0.154076	0.780758	-0.0154978	2.21079e-08	-0.209628	0.175948	-0.0752531	4.7269e-08	-0.204739	0.000143846	-0.209333	2.16534e-16	-0.3038
GO_REGULATION_OF_TRANSCRIPTION_FACTOR_IMPORT_INTO_NUCLEUS	3.38305e-17	0.444823	1.67582e-32	0.427982	2.46221e-29	0.569496	1.77797e-17	0.314161	5.14317e-20	0.478662	1.02498e-36	0.453283	0.00030705	0.198968	2.84786e-14	0.282285
GO_EPITHELIAL_CILIUM_MOVEMENT	0.697312	0.0216561	0.00431481	0.107833	0.884878	-0.00806235	0.494964	-0.025854	0.0841985	0.0959358	0.676215	0.0158237	0.00318657	0.16312	0.00226038	0.115322
GO_NEGATIVE_REGULATION_OF_MEIOTIC_CELL_CYCLE	0.0405151	0.113697	0.0016875	0.118572	0.0356767	0.116572	1.63817e-07	0.196474	0.120125	0.0863859	8.74905e-09	0.215437	0.0116461	-0.139785	0.456271	0.0282234
GO_MESENCHYMAL_CELL_DIFFERENTIATION	0.000425423	0.194347	0.000140126	0.14354	8.10702e-05	0.216848	0.0122489	0.0947001	4.65116e-05	0.22389	2.39689e-05	0.159044	0.864872	-0.00947593	0.680816	0.0155856
GO_NEGATIVE_REGULATION_OF_DNA_BIOSYNTHETIC_PROCESS	0.912487	0.00611983	0.317379	-0.0378724	0.888237	-0.00782554	0.101381	0.0620136	0.0539359	-0.107015	0.501073	0.0254892	0.000467648	-0.192985	0.951235	0.00231726
GO_SHORT_CHAIN_FATTY_ACID_METABOLIC_PROCESS	0.000295452	-0.199507	4.81573e-08	-0.204618	2.037e-05	-0.23396	2.74312e-05	-0.157911	4.26443e-05	-0.22497	3.88448e-10	-0.233851	0.0259615	-0.123522	1.09317e-05	-0.165491
GO_ATRIAL_SEPTUM_MORPHOGENESIS	0.726082	-0.0195068	0.012728	0.0941882	0.406912	-0.0461568	0.0855124	0.0650872	0.75896	0.0170854	0.000887751	0.125448	0.127558	0.0846998	0.0526128	0.0733377
GO_REGULATION_OF_SMALL_GTPASE_MEDIATED_SIGNAL_TRANSDUCTION	0.535851	0.034464	2.08892e-10	0.237337	0.00738847	0.148342	0.0223068	-0.0864234	0.338376	0.0532734	0.128407	0.0575627	0.174766	-0.0754588	0.87016	0.00619346
GO_CELLULAR_RESPONSE_TO_GROWTH_HORMONE_STIMULUS	1.36598e-10	0.34635	4.77807e-33	0.431377	2.56627e-17	0.446343	1.7016e-08	0.211286	1.26156e-10	0.346962	7.12734e-24	0.368257	0.213496	0.0691891	1.55813e-05	0.162611
GO_REGULATION_OF_INTERLEUKIN_2_BIOSYNTHETIC_PROCESS	2.49885e-26	0.543082	1.42238e-63	0.578097	8.30586e-41	0.652533	2.56497e-59	0.561485	2.73185e-37	0.629606	3.09641e-91	0.667222	4.89279e-16	0.429718	1.28261e-44	0.495677
GO_RNA_MODIFICATION	0.17521	-0.0753814	0.00389404	-0.109051	0.117833	-0.0869222	0.0267143	0.0838068	0.155966	-0.0788804	0.819885	-0.00862743	0.774424	-0.0159578	0.704532	0.014368
GO_CELLULAR_COMPONENT_ASSEMBLY_INVOLVED_IN_MORPHOGENESIS	0.00242479	-0.16767	0.0638469	0.0701354	0.00294798	-0.164428	0.000334168	-0.135301	0.00624331	-0.151403	0.0958507	-0.063038	0.00793213	-0.147035	0.16775	-0.0522342
GO_ORGANELLE_FISSION	0.916035	-0.00587074	0.461515	0.027896	0.725943	-0.0195171	0.00902754	0.0986929	0.547515	-0.0334842	0.0323178	0.0809715	0.0650781	-0.102452	0.389684	-0.0325851
GO_EMBRYONIC_FORELIMB_MORPHOGENESIS	0.0346114	0.117248	1.36976e-06	0.181469	0.204806	0.0705188	0.00109509	0.123239	0.0241003	0.125104	3.56589e-06	0.174288	0.078828	0.0976332	0.168058	0.0521964
GO_REGULATION_OF_FIBROBLAST_APOPTOTIC_PROCESS	0.116298	0.0872859	7.73669e-10	0.229912	0.0153441	0.134375	4.09804e-10	0.233547	0.0357721	0.116512	1.25733e-12	0.264194	0.0997326	-0.091473	0.30687	-0.0387033
GO_NOSE_DEVELOPMENT	0.460597	-0.0410703	0.471464	-0.0272804	0.570192	-0.031608	9.64685e-06	-0.166495	0.306562	0.0568892	0.00434338	-0.107754	0.00203224	0.170553	0.56824	-0.02162
GO_CELL_DIFFERENTIATION_INVOLVED_IN_KIDNEY_DEVELOPMENT	2.1451e-09	0.324299	2.2595e-06	0.177748	8.17527e-09	0.312914	0.000345421	0.134977	3.43189e-09	0.320354	4.63314e-07	0.189278	0.00794559	0.147004	0.25376	0.0432238
GO_REGULATION_OF_TRANSCRIPTION_FROM_RNA_POLYMERASE_III_PROMOTER	0.00872492	-0.145266	0.33239	-0.036716	0.0370825	-0.115704	0.000292779	-0.136584	0.000394056	-0.195441	0.00265467	-0.1135	6.08064e-05	-0.220521	0.00379569	-0.109353
GO_MUSCLE_STRUCTURE_DEVELOPMENT	0.175168	0.0753888	0.195517	0.0490181	0.0927692	0.0933993	0.00401194	-0.108698	0.306815	0.0568595	0.800006	-0.00959915	0.0386168	-0.114789	0.515372	-0.0246444
GO_NEGATIVE_REGULATION_OF_CELL_CYCLE_PROCESS	0.262613	0.0623192	0.0209931	0.0872902	0.180624	0.0744491	0.0034336	0.11053	0.239424	0.0654386	0.000721564	0.127596	0.276897	-0.0604913	0.435904	0.0295158
GO_RESPONSE_TO_INCREASED_OXYGEN_LEVELS	7.17895e-16	0.427487	4.95424e-16	0.300276	3.28794e-22	0.502633	6.00074e-46	0.502261	9.97592e-14	0.397191	2.6763e-42	0.483838	0.0673101	0.101617	4.5576e-16	0.300633
GO_REGULATION_OF_CHROMATIN_SILENCING	1.57263e-05	-0.237025	0.200702	-0.0484554	4.7688e-06	-0.250662	5.41589e-06	-0.171058	6.35735e-07	-0.272063	0.00015842	-0.142404	8.78822e-05	-0.215806	0.00125511	-0.121784
GO_MACROMOLECULAR_COMPLEX_REMODELING	0.000121182	0.211607	5.45141e-10	0.231922	1.30422e-06	0.264644	4.30974e-15	0.29083	1.22479e-06	0.265302	1.03223e-13	0.276284	4.60372e-07	0.275324	9.39727e-15	0.287337
GO_RIBOSOMAL_LARGE_SUBUNIT_ASSEMBLY	0.344649	-0.0525866	0.00017065	-0.141711	0.100639	-0.0912301	0.509293	0.025002	0.224941	-0.0674959	0.287266	-0.0403052	0.806977	-0.0136046	0.425723	0.0301748
GO_MAINTENANCE_OF_LOCATION_IN_CELL	2.92129e-08	0.30161	2.01972e-24	0.372435	1.49111e-11	0.362913	1.30624e-05	0.16405	1.02861e-07	0.289941	1.60377e-17	0.31458	0.211305	0.0695206	1.51146e-08	0.212031
GO_CEREBELLAR_CORTEX_DEVELOPMENT	1.4239e-19	-0.473593	9.10395e-25	-0.375044	2.78164e-21	-0.492731	4.19932e-49	-0.51733	2.64614e-25	-0.533514	1.25474e-50	-0.52435	2.09529e-13	-0.392357	1.89445e-34	-0.439937
GO_REGULATION_OF_MICROTUBULE_POLYMERIZATION	9.21149e-14	-0.397706	2.17167e-18	-0.322572	6.06072e-14	-0.400394	2.10967e-37	-0.457211	9.64474e-17	-0.438989	9.51551e-38	-0.45917	3.21978e-11	-0.357265	1.30946e-19	-0.333409
GO_REGULATION_OF_MESODERM_DEVELOPMENT	0.0177846	-0.131404	0.0511161	-0.0738063	0.00178955	-0.172602	0.739092	-0.0126194	0.0022595	-0.168828	0.506943	-0.0251409	0.000702937	-0.187016	0.000129897	-0.144238
GO_T_HELPER_1_TYPE_IMMUNE_RESPONSE	2.00437e-22	0.504883	1.92196e-66	0.588783	1.39391e-34	0.610544	1.73549e-66	0.588945	7.10941e-38	0.633555	3.16675e-95	0.677935	9.88689e-15	0.411766	3.20389e-41	0.478173
GO_POSITIVE_REGULATION_OF_TYPE_2_IMMUNE_RESPONSE	3.91804e-26	0.541282	1.02479e-60	0.567048	3.87004e-35	0.614569	3.03814e-65	0.584367	1.09953e-35	0.618467	3.52284e-99	0.688119	2.72476e-11	0.358499	4.93179e-37	0.455107
GO_PLASMA_LIPOPROTEIN_PARTICLE_CLEARANCE	5.70995e-07	0.273153	1.32437e-17	0.315356	8.32146e-12	0.36712	3.35618e-25	0.378278	3.08699e-11	0.357577	1.59143e-26	0.387941	1.05833e-06	0.266824	3.02312e-17	0.311995
GO_CELLULAR_RESPONSE_TO_OXYGEN_LEVELS	7.10057e-08	0.293431	6.35928e-06	0.169801	4.16255e-10	0.337637	6.55814e-19	0.327246	1.76046e-05	0.235693	5.04644e-22	0.353669	0.875135	-0.0087501	0.00258001	0.113825
GO_DNA_CATABOLIC_PROCESS	0.813333	0.0131481	0.0689295	0.068838	0.783833	0.0152749	0.904629	0.00453993	0.794957	0.0144705	0.87472	0.00597413	0.765223	0.0166279	0.542286	0.0230864
GO_REGULATION_OF_INTRACELLULAR_ESTROGEN_RECEPTOR_SIGNALING_PATHWAY	0.877016	0.00861718	0.705592	-0.0143139	0.280204	0.0600773	3.9212e-05	-0.154871	0.851235	0.0104429	0.00223992	-0.115425	0.00212038	-0.169864	0.000159225	-0.142357
GO_CELLULAR_RESPONSE_TO_HORMONE_STIMULUS	0.0436148	0.112005	0.00301926	0.112023	0.0127344	0.138052	0.853748	-0.00698471	0.355935	0.0513706	0.0202862	0.0877763	7.92565e-05	-0.217139	0.00207903	-0.11626
GO_RESPONSE_TO_PROSTAGLANDIN	1.40924e-07	0.286939	4.03057e-19	0.329123	1.07201e-11	0.3653	9.29435e-12	0.254056	1.58477e-09	0.326811	4.53187e-21	0.345845	0.521373	0.0356953	0.000442819	0.13253
GO_CELL_FATE_COMMITMENT_INVOLVED_IN_FORMATION_OF_PRIMARY_GERM_LAYER	0.100112	0.091371	0.0178881	0.0895435	0.892652	0.0075145	0.189168	0.0497222	0.0131281	0.137457	0.008612	0.0992975	0.97738	-0.0015789	0.75815	-0.0116668
GO_DNA_REPAIR	0.0961396	-0.092453	0.214802	-0.046977	0.0551917	-0.106464	0.11373	0.0598769	0.0278558	-0.12201	0.649881	0.0171986	0.0307818	-0.119838	0.255379	-0.0430768
GO_T_CELL_DIFFERENTIATION_INVOLVED_IN_IMMUNE_RESPONSE	2.2513e-19	0.471286	7.64173e-45	0.496801	2.14312e-33	0.601761	1.52128e-54	0.541663	1.62539e-22	0.505831	4.70054e-73	0.611983	5.35501e-06	0.249372	1.44468e-22	0.358031
GO_INSULIN_LIKE_GROWTH_FACTOR_RECEPTOR_SIGNALING_PATHWAY	0.000176692	-0.206572	0.000141264	-0.143465	0.00176292	-0.172842	4.09962e-25	-0.377633	8.90156e-06	-0.243629	1.21576e-18	-0.324847	3.61698e-09	-0.31991	9.0857e-15	-0.287489
GO_PROTEIN_HETEROTETRAMERIZATION	0.00113902	0.179705	0.000228219	0.138972	0.00757281	0.14789	4.85894e-16	0.300359	0.0370125	0.115747	1.669e-13	0.274006	0.508005	-0.0368477	0.0474906	0.0749909
GO_NEGATIVE_REGULATION_OF_HEART_CONTRACTION	0.00256176	0.166764	0.115612	0.0595675	0.0573849	0.105526	0.319133	-0.0377354	0.025833	0.123629	0.505486	0.0252271	0.686278	0.0224888	0.153473	-0.0540454
GO_SUBSTRATE_INDEPENDENT_TELENCEPHALIC_TANGENTIAL_MIGRATION	2.6363e-06	-0.257155	1.02482e-06	-0.183592	4.38418e-05	-0.224626	9.19593e-08	-0.200357	1.66241e-06	-0.262088	1.13801e-07	-0.198933	0.0013781	-0.176742	3.36205e-06	-0.174738
GO_SULFUR_COMPOUND_CATABOLIC_PROCESS	0.00284795	0.165005	0.510662	-0.0249213	0.000431938	0.194129	0.00187803	0.117392	0.0780516	0.0978863	0.0292754	0.0824532	0.0179372	-0.13123	0.129372	-0.0574178
GO_CHLORIDE_TRANSPORT	0.0243331	-0.124901	0.00377998	-0.109402	0.0594027	-0.104688	1.58154e-08	-0.211746	0.0168257	-0.132526	6.83971e-07	-0.186509	0.0497963	-0.108912	0.000227299	-0.13901
GO_MICROTUBULE_DEPOLYMERIZATION	0.306543	0.0568915	0.0145776	-0.0923594	0.807238	0.0135859	0.0296754	-0.082251	0.108119	0.08929	0.00242499	-0.114529	0.440751	0.0429089	0.182818	-0.0504439
GO_PROTEIN_POLYMERIZATION	0.00148466	0.17557	4.64184e-05	0.153415	0.000592092	0.189551	0.774774	0.0108417	0.000577494	0.189917	0.0193318	0.0884566	0.651827	-0.0251223	0.247094	0.0438357
GO_CELLULAR_RESPONSE_TO_CORTICOSTEROID_STIMULUS	0.0488146	0.109381	0.412405	0.0310508	0.00974476	0.143189	0.000831698	0.126128	0.283026	0.0597265	0.000296768	0.136453	0.000512502	-0.191659	0.515137	-0.0246582
GO_SIGNAL_TRANSDUCTION_IN_RESPONSE_TO_DNA_DAMAGE	4.66285e-05	0.223859	0.000607878	0.129348	3.44557e-05	0.227602	7.21309e-08	0.201968	3.79358e-05	0.226418	4.27182e-09	0.21982	0.345765	0.0524652	0.231763	0.0452883
GO_COBALAMIN_METABOLIC_PROCESS	8.78308e-05	0.215814	1.88832e-11	0.250355	4.32855e-07	0.275942	1.05348e-12	0.26507	0.0084298	0.145907	2.65677e-14	0.282604	0.406686	0.046179	0.000536478	0.130612
GO_NEGATIVE_REGULATION_OF_SYSTEMIC_ARTERIAL_BLOOD_PRESSURE	0.885987	0.00798414	5.58478e-05	0.151805	0.939537	-0.00422374	0.00378733	0.109379	0.347081	-0.0523224	2.52149e-07	0.193521	0.0148536	-0.135022	0.455037	0.0283008
GO_MUSCLE_CONTRACTION	0.827522	-0.0121321	0.0684523	0.0689564	0.484727	-0.0388932	0.383789	-0.0329919	0.423599	-0.0445363	0.614609	0.0190767	0.0544219	-0.106801	0.449679	0.0286381
GO_TELOMERE_LOCALIZATION	0.0387695	0.114699	0.0862279	0.0649392	0.0169338	0.132397	0.000111106	0.145667	0.915376	-0.005917	0.00428573	0.107914	0.0210644	-0.127926	0.00495294	-0.106176
GO_TRANSITION_METAL_ION_HOMEOSTASIS	6.53763e-15	0.414301	1.20215e-18	0.32489	6.26947e-23	0.510102	4.81928e-31	0.418699	3.85541e-16	0.431096	8.86277e-38	0.459345	0.0630638	0.103227	1.99759e-06	0.178671
GO_REGULATION_OF_ADHERENS_JUNCTION_ORGANIZATION	0.0232502	0.125862	0.000110131	0.145747	0.00339774	0.162035	0.0933217	-0.0635223	0.164476	0.0772954	0.269864	0.0417901	0.000364487	-0.196551	0.00911959	-0.0985623
GO_ENZYME_LINKED_RECEPTOR_PROTEIN_SIGNALING_PATHWAY	9.9168e-06	0.24239	2.5245e-20	0.339566	2.26304e-08	0.303915	5.59906e-06	0.170798	0.000168759	0.207192	5.63592e-17	0.30943	0.0960393	-0.0924808	0.150391	0.054453
GO_PYRIMIDINE_NUCLEOTIDE_CATABOLIC_PROCESS	0.231158	-0.0666016	1.44458e-05	-0.16323	0.00813252	-0.146573	0.474578	0.0270892	0.0183494	-0.130767	0.0676063	-0.069168	0.42694	-0.0442163	0.0844569	0.0653075
GO_PROTEIN_KINASE_C_ACTIVATING_G_PROTEIN_COUPLED_RECEPTOR_SIGNALING_PATHWAY	0.253736	-0.0634899	0.0219949	-0.0866251	0.360453	-0.0508906	2.01091e-10	-0.23755	0.0228328	-0.126243	7.69014e-07	-0.185668	3.51223e-05	-0.227366	6.93167e-13	-0.267129
GO_REGULATION_OF_DEFENSE_RESPONSE_TO_VIRUS_BY_VIRUS	5.8328e-14	0.400639	3.19573e-31	0.41985	7.64092e-24	0.51933	3.89878e-41	0.477721	1.31422e-13	0.395405	9.26993e-52	0.529456	0.0247678	0.124525	9.34395e-17	0.30733
GO_REGULATION_OF_RECEPTOR_INTERNALIZATION	0.329492	0.0542601	7.6762e-09	0.216244	0.0905065	0.09405	1.76927e-07	0.19595	0.80229	-0.0139419	6.2172e-13	0.267662	0.0094521	-0.143764	0.498925	0.0256172
GO_REGULATION_OF_CALCIUM_ION_TRANSMEMBRANE_TRANSPORT	0.0127288	0.13806	0.387081	0.0327642	0.0138608	0.136391	0.975169	-0.00117942	0.0306968	0.119899	0.18587	0.0500948	0.105164	-0.0900433	0.296514	-0.0395407
GO_PROTEIN_LOCALIZATION_TO_CHROMOSOME_CENTROMERIC_REGION	0.0255268	0.123883	3.67454e-07	0.190906	0.0384753	0.114872	1.14682e-15	0.296652	0.0934829	0.0931966	6.04826e-16	0.299419	0.41127	-0.0457299	0.00175209	0.118158
GO_RESPONSE_TO_BACTERIUM	7.98362e-35	0.612302	4.37632e-74	0.615434	4.34862e-49	0.699662	1.93896e-83	0.644912	4.37272e-47	0.689052	1.68489e-128	0.752409	3.64945e-11	0.356335	3.78465e-38	0.461423
GO_REGULATION_OF_ANTIGEN_PROCESSING_AND_PRESENTATION	1.40022e-25	0.536124	1.00567e-65	0.586144	6.70496e-36	0.619985	1.44836e-77	0.626777	3.37216e-43	0.667063	3.15816e-106	0.705284	6.00952e-17	0.441637	3.37368e-37	0.45605
GO_VASOCONSTRICTION	0.231363	0.0665724	0.787479	0.0102147	0.198682	0.0714807	0.929669	0.00334433	0.150571	0.0799195	0.623653	0.0185909	0.419227	-0.0449572	0.0113086	-0.0957586
GO_REGULATION_OF_MITOCHONDRIAL_TRANSLATION	0.0183184	-0.130802	5.49312e-08	-0.203758	0.00369827	-0.160592	0.0341992	0.0801139	0.000420651	-0.194508	0.224006	-0.0460492	0.096979	-0.0922215	0.386539	-0.0328016
GO_POSITIVE_REGULATION_OF_LEUKOCYTE_MIGRATION	7.69424e-33	0.597557	1.5655e-58	0.558313	1.58082e-47	0.691433	7.33594e-82	0.640159	4.99987e-46	0.683254	3.74577e-116	0.727521	9.75168e-14	0.397338	3.33292e-35	0.444446
GO_CALCIUM_ION_IMPORT	0.0045891	0.156862	0.000100916	0.14654	3.32261e-05	0.228047	0.61226	0.0192034	0.00246185	0.167421	0.00754955	0.100971	0.878467	0.00851474	0.0488335	-0.0745436
GO_CELL_MATURATION	0.00401236	0.159192	6.16609e-14	0.278702	0.000895393	0.183385	5.0015e-09	0.218863	0.000811779	0.184864	4.6596e-15	0.290482	0.128172	0.0845638	0.00116379	0.122592
GO_BEHAVIORAL_RESPONSE_TO_PAIN	4.19771e-20	0.479663	3.37049e-20	0.338495	1.04638e-26	0.546535	4.24147e-28	0.399025	1.43476e-25	0.536025	3.94225e-39	0.46688	1.09925e-07	0.289311	3.8272e-08	0.20611
GO_REGULATION_OF_SECRETION	1.4932e-05	0.237634	8.59932e-09	0.215544	1.56358e-06	0.262736	3.31887e-05	0.156297	9.0026e-06	0.243499	2.93641e-10	0.23543	0.551553	0.0331474	0.0223703	0.0863827
GO_CELLULAR_RESPONSE_TO_TOXIC_SUBSTANCE	0.0585931	-0.105021	1.1894e-06	-0.182505	0.234316	-0.0661539	1.34503e-11	-0.252134	0.00184101	-0.172147	2.05557e-08	-0.210091	1.18564e-05	-0.240326	4.51877e-15	-0.290619
GO_MODULATION_OF_TRANSCRIPTION_IN_OTHER_ORGANISM_INVOLVED_IN_SYMBIOTIC_INTERACTION	0.00217221	0.169471	0.145043	0.0551756	0.000100913	0.214009	0.858099	0.00677468	1.33053e-05	0.238985	0.122413	0.0584815	0.00505682	0.155159	0.105303	0.0613137
GO_APOPTOTIC_SIGNALING_PATHWAY	3.32634e-23	0.51291	1.70263e-46	0.504929	1.09991e-33	0.60393	5.04086e-65	0.583549	8.56089e-31	0.581507	7.77912e-88	0.657726	2.03402e-07	0.283395	2.35849e-21	0.348196
GO_NEURAL_NUCLEUS_DEVELOPMENT	6.92206e-09	-0.314356	1.93416e-10	-0.237766	8.73339e-11	-0.349774	1.22041e-05	-0.164601	8.95086e-10	-0.331489	5.04327e-08	-0.204317	0.00409672	-0.158833	0.00100954	-0.124099
GO_LYMPHOCYTE_MEDIATED_IMMUNITY	3.61156e-31	0.584514	2.49529e-68	0.595599	5.48743e-48	0.693885	8.50578e-88	0.657615	2.89788e-47	0.690017	1.3095e-119	0.73478	5.90988e-14	0.400555	1.14337e-36	0.45301
GO_REGULATION_OF_HEART_MORPHOGENESIS	2.40056e-05	0.231992	0.020708	0.0874845	0.000352192	0.197037	3.60173e-06	0.174211	2.52877e-06	0.257605	3.7099e-07	0.190839	0.00322722	0.162907	5.13708e-07	0.188548
GO_S_ADENOSYLMETHIONINE_METABOLIC_PROCESS	0.793143	0.0146014	2.78673e-06	0.176166	0.557631	0.0326427	0.000123017	0.144737	0.888279	0.0078226	2.1697e-05	0.159876	0.865174	0.00945459	0.0015719	0.119349
GO_FC_EPSILON_RECEPTOR_SIGNALING_PATHWAY	4.88192e-13	0.386748	1.63676e-18	0.323683	1.00137e-17	0.451465	1.50284e-44	0.495332	1.13254e-14	0.410929	3.82594e-52	0.531171	0.074491	0.0990737	1.54313e-13	0.274379
GO_HIPPOCAMPUS_DEVELOPMENT	2.61604e-18	-0.458624	1.10959e-32	-0.429101	1.53626e-26	-0.545017	1.31246e-41	-0.480222	2.07873e-25	-0.534506	5.13738e-48	-0.512221	1.07248e-12	-0.381431	3.85369e-34	-0.438075
GO_REGULATION_OF_PROTEIN_LOCALIZATION_TO_CELL_SURFACE	0.502298	-0.0373445	7.98357e-05	0.148646	0.442551	-0.0427402	0.00125918	0.121749	0.418558	-0.0450218	3.59853e-06	0.174218	0.125277	-0.0852089	0.0791369	0.0664528
GO_RIBONUCLEOSIDE_TRIPHOSPHATE_BIOSYNTHETIC_PROCESS	0.178415	0.0748269	0.152209	-0.0542118	0.683414	-0.0227057	2.56831e-10	0.236182	0.50664	0.0369663	7.60111e-05	0.149084	0.0953773	0.0926647	5.70315e-06	0.170654
GO_PRIMARY_AMINO_COMPOUND_METABOLIC_PROCESS	6.70657e-05	-0.219277	0.000326629	-0.135523	5.85189e-05	-0.221007	1.47712e-19	-0.332953	9.88588e-06	-0.242426	2.12919e-13	-0.272844	4.12046e-05	-0.225396	7.05676e-08	-0.202112
GO_POSITIVE_REGULATION_OF_TELOMERE_CAPPING	0.723218	0.0197194	1.54208e-07	-0.196884	0.735837	-0.0187847	1.62098e-09	-0.225602	0.252209	-0.0636941	8.18642e-12	-0.254713	0.0490745	-0.109256	6.25003e-06	-0.169937
GO_NEGATIVE_REGULATION_OF_AMINE_TRANSPORT	0.0217469	-0.127263	0.0610979	-0.070873	0.00883235	-0.145037	0.015702	-0.0913451	0.00354347	-0.161321	0.0816819	-0.0658974	0.0630054	-0.103249	0.0230102	-0.0859774
GO_REGULATION_OF_CHROMOSOME_SEGREGATION	0.881344	0.00831167	0.472619	0.0272094	0.93214	0.00474164	0.00419273	0.108175	0.585974	-0.0303232	0.0123442	0.094597	0.0206804	-0.128308	0.251596	-0.0434211
GO_POSITIVE_REGULATION_OF_INSULIN_RECEPTOR_SIGNALING_PATHWAY	7.9048e-08	-0.292426	4.29416e-12	-0.258021	9.18593e-07	-0.268291	1.30195e-16	-0.305942	1.42915e-11	-0.363221	3.17524e-19	-0.330038	5.21462e-16	-0.429348	7.39874e-15	-0.288414
GO_PONS_DEVELOPMENT	4.00283e-15	-0.417279	4.00675e-34	-0.437972	1.74067e-18	-0.460763	2.34596e-45	-0.499347	1.01025e-17	-0.451417	4.12283e-54	-0.539798	1.455e-06	-0.263495	7.1293e-24	-0.368256
GO_PROTEIN_K11_LINKED_UBIQUITINATION	0.10962	0.0889134	0.395947	-0.0321569	0.976287	-0.00165515	5.17201e-10	0.232223	0.838539	0.0113461	3.3627e-06	0.174737	0.252668	0.0636327	0.39487	0.0322303
GO_DETECTION_OF_CHEMICAL_STIMULUS_INVOLVED_IN_SENSORY_PERCEPTION_OF_TASTE	0.874448	0.00879861	0.000482009	-0.131685	0.698458	-0.0215699	3.09114e-16	-0.30229	0.991455	-0.00059639	2.35851e-17	-0.313011	0.40798	0.0460519	0.000241029	-0.138451
GO_REGULATION_OF_MESENCHYMAL_CELL_APOPTOTIC_PROCESS	0.622282	0.0274261	0.274049	0.0414272	0.442197	-0.0427734	0.929047	-0.003374	0.395814	0.0472565	0.698321	0.0146854	0.407789	0.0460706	0.302969	-0.0390165
GO_RESPONSE_TO_INACTIVITY	0.149976	-0.0800358	0.0404009	0.077546	0.706285	-0.0209824	0.917846	0.00390838	0.262949	-0.0622755	0.504313	0.0252967	0.17625	-0.0752006	0.784064	-0.010383
GO_SPHINGOLIPID_METABOLIC_PROCESS	0.000255088	0.20155	4.62129e-12	0.257647	2.18118e-07	0.282715	1.39937e-13	0.274844	0.0054793	0.153739	1.06869e-15	0.296959	0.722977	-0.0197373	0.0115923	0.0954313
GO_RESPONSE_TO_PAIN	0.00119225	0.178999	0.494992	0.0258523	0.0500405	0.108796	0.0741603	0.0675822	0.00374349	0.160384	0.00173655	0.118257	0.38699	0.0481442	0.390761	0.0325111
GO_PROTEIN_ACETYLATION	6.14527e-09	-0.315383	1.74209e-08	-0.211137	4.99193e-08	-0.296707	1.9193e-18	-0.323058	7.53081e-11	-0.350898	7.94485e-19	-0.326502	2.3146e-05	-0.232431	3.82622e-12	-0.258608
GO_POSITIVE_REGULATION_OF_TRANSCRIPTION_ELONGATION_FROM_RNA_POLYMERASE_II_PROMOTER	0.117542	-0.0869907	0.00109532	-0.123237	0.018829	-0.13024	5.67479e-06	-0.170693	0.35489	-0.0514821	1.36407e-06	-0.1815	0.146213	-0.0807796	3.02344e-07	-0.192265
GO_REGULATION_OF_NUCLEOCYTOPLASMIC_TRANSPORT	1.19861e-05	0.2402	1.45006e-15	0.29563	1.24245e-09	0.328813	0.00010961	0.14579	9.73458e-07	0.267691	1.63802e-13	0.274096	0.465936	0.0405833	0.000332237	0.135357
GO_NEGATIVE_REGULATION_OF_CALCIUM_ION_IMPORT	6.15966e-10	0.334507	0.00250583	0.114157	4.24494e-07	0.276137	2.31333e-16	0.30352	1.47843e-09	0.327384	6.11129e-17	0.309095	0.00988993	0.142909	1.14611e-05	0.165109
GO_CELLULAR_HORMONE_METABOLIC_PROCESS	7.15759e-07	0.270854	9.2939e-06	0.166793	1.33366e-07	0.287467	6.37413e-08	0.202782	2.30627e-08	0.303745	1.62068e-09	0.225603	0.000896765	0.183361	2.31181e-07	0.194119
GO_PTERIDINE_CONTAINING_COMPOUND_METABOLIC_PROCESS	0.0616949	0.103765	2.1309e-05	0.160026	0.0692948	0.100892	1.35413e-17	0.315266	0.000423479	0.194412	1.75766e-16	0.30468	0.00765387	0.147694	1.49975e-06	0.180801
GO_BONE_REMODELING	1.6304e-20	0.48428	1.01562e-29	0.410016	5.05352e-27	0.549393	1.06348e-26	0.389194	4.60128e-21	0.49035	1.54246e-39	0.469116	4.50888e-05	0.224277	7.10674e-08	0.202066
GO_EMBRYONIC_CAMERA_TYPE_EYE_MORPHOGENESIS	0.936195	0.00445769	0.184129	0.0502934	0.818448	0.0127814	0.00010561	-0.146128	0.746538	-0.0179962	0.0583458	-0.0716395	0.311142	-0.056354	0.00621525	-0.1034
GO_FORMATION_OF_TRANSLATION_PREINITIATION_COMPLEX	0.175827	0.0752741	1.87605e-05	-0.161083	0.0843158	0.0958997	0.285936	-0.0404165	0.338174	0.0532956	0.0188982	-0.0887753	0.624739	-0.0272328	0.0646929	-0.0699137
GO_CHEMOKINE_MEDIATED_SIGNALING_PATHWAY	3.14009e-21	0.492159	7.71973e-43	0.486636	2.46898e-28	0.560959	3.42933e-67	0.591507	5.49249e-27	0.549067	7.93741e-86	0.651948	2.00778e-08	0.304989	1.13612e-28	0.402952
GO_POSITIVE_REGULATION_OF_INTERFERON_BETA_PRODUCTION	1.12953e-21	0.49695	3.31666e-58	0.556986	1.80129e-38	0.637523	2.16438e-44	0.494537	1.70998e-27	0.553596	6.94792e-70	0.601097	1.92124e-08	0.305383	7.49722e-20	0.33551
GO_NEGATIVE_REGULATION_OF_LEUKOCYTE_MIGRATION	1.54421e-07	0.28606	9.3278e-20	0.334689	4.28876e-11	0.355133	5.38824e-25	0.376748	7.86897e-08	0.292469	3.47952e-33	0.432229	0.0594142	0.104683	9.65481e-14	0.276599
GO_REGULATION_OF_PROTEIN_SECRETION	4.58462e-16	0.430094	5.96546e-28	0.398	1.89151e-21	0.494544	2.21097e-23	0.364453	3.74663e-19	0.468699	1.53075e-39	0.469134	0.000442893	0.193769	1.64838e-13	0.274065
GO_REGULATION_OF_PEPTIDYL_TYROSINE_PHOSPHORYLATION	1.27548e-23	0.517109	2.13962e-60	0.565786	2.69672e-39	0.642919	2.53898e-53	0.536366	1.0794e-28	0.564052	2.84989e-89	0.661779	1.02743e-06	0.267132	1.09657e-24	0.374437
GO_REGULATION_OF_NATURAL_KILLER_CELL_ACTIVATION	4.41444e-24	0.52169	6.82864e-52	0.530049	3.33631e-32	0.592656	3.31495e-45	0.498604	1.48929e-29	0.571326	4.76198e-68	0.594595	5.73932e-12	0.369767	7.45234e-37	0.454079
GO_RESPONSE_TO_INSULIN	0.0360836	0.116318	0.583271	0.0207854	0.00385557	0.159878	0.63073	-0.0182128	0.549818	0.033292	0.318549	0.0377809	0.000433261	-0.194085	0.00010258	-0.146392
GO_POSITIVE_REGULATION_OF_FILOPODIUM_ASSEMBLY	0.255843	-0.0632095	3.25029e-05	-0.156474	0.195675	-0.0719609	7.02886e-17	-0.308515	0.180871	-0.074407	6.93314e-14	-0.278154	0.0283697	-0.121615	5.29354e-11	-0.244864
GO_REGULATION_OF_MUSCLE_CELL_APOPTOTIC_PROCESS	0.920377	-0.00556614	0.389835	-0.0325747	0.185368	0.0736488	0.000732124	-0.127446	0.500998	-0.0374581	0.00250287	-0.11417	0.00176332	-0.172838	0.0340459	-0.0801823
GO_POSITIVE_REGULATION_OF_NIK_NF_KAPPAB_SIGNALING	2.34398e-15	0.420495	1.34239e-45	0.500544	1.17699e-26	0.546071	5.45307e-19	0.327959	5.23846e-23	0.510901	3.50939e-37	0.455952	0.000447094	0.193633	3.00742e-06	0.175588
GO_REGULATION_OF_CATABOLIC_PROCESS	0.00485012	0.155894	1.36278e-08	0.212681	0.00037157	0.196278	2.33279e-23	0.364272	0.0386141	0.11479	1.84405e-26	0.387481	0.129686	-0.0842312	0.00129233	0.12147
GO_REGULATION_OF_CARBOHYDRATE_METABOLIC_PROCESS	0.000342883	0.197415	1.49749e-08	0.21209	4.77032e-07	0.274967	0.0480318	0.0748094	0.0103989	0.141956	9.75723e-07	0.183948	0.0468294	-0.110354	0.248782	-0.0436797
GO_NEGATIVE_REGULATION_OF_SYNAPTIC_TRANSMISSION	9.06127e-17	-0.43934	4.28044e-21	-0.346052	3.44915e-16	-0.431738	4.12938e-35	-0.443894	6.03775e-22	-0.499848	4.67919e-38	-0.460906	1.30216e-14	-0.410066	1.79661e-29	-0.408363
GO_NEGATIVE_REGULATION_OF_CYTOKINE_BIOSYNTHETIC_PROCESS	1.69127e-20	0.484103	8.98008e-39	0.464905	3.3456e-28	0.559815	2.53856e-53	0.536366	1.79896e-25	0.535099	1.94744e-75	0.619895	7.59092e-07	0.270252	3.7687e-34	0.438133
GO_ROSTROCAUDAL_NEURAL_TUBE_PATTERNING	4.49237e-05	-0.224323	3.81656e-12	-0.258621	2.60257e-07	-0.280986	3.94181e-19	-0.329208	0.000568805	-0.190139	4.03986e-22	-0.35445	0.320479	-0.0552789	2.12144e-06	-0.178221
GO_B_CELL_ACTIVATION	2.52302e-22	0.503839	3.66416e-75	0.618995	1.44304e-39	0.644672	5.93098e-56	0.547654	3.31562e-26	0.541951	1.20742e-91	0.668341	0.000353155	0.196998	8.06197e-26	0.382839
GO_CELL_DEATH_IN_RESPONSE_TO_OXIDATIVE_STRESS	0.000152729	0.208532	6.32888e-07	0.187064	2.79214e-06	0.256533	1.19389e-13	0.275596	8.23052e-06	0.244523	1.28375e-13	0.275253	0.0429774	0.112345	8.09272e-07	0.185301
GO_REGULATION_OF_NEURON_DIFFERENTIATION	9.29025e-13	-0.382409	1.61836e-16	-0.305028	3.85419e-12	-0.372579	1.08289e-36	-0.453146	8.76441e-15	-0.412507	1.00598e-34	-0.441587	1.50163e-09	-0.327256	7.7192e-23	-0.360192
GO_NEGATIVE_REGULATION_OF_INTERFERON_GAMMA_PRODUCTION	3.81786e-28	0.559316	3.80464e-62	0.572631	3.31511e-43	0.667107	4.47386e-74	0.615402	1.1342e-39	0.645344	1.69979e-101	0.693896	9.08485e-13	0.38256	3.67052e-39	0.467051
GO_REGULATION_OF_FIBRINOLYSIS	3.63647e-16	0.431433	1.5702e-11	0.251324	7.02595e-16	0.427612	1.11557e-27	0.396109	1.21558e-19	0.474386	1.63446e-29	0.408637	1.59482e-05	0.23686	1.7661e-20	0.340884
GO_NEGATIVE_REGULATION_OF_NF_KAPPAB_TRANSCRIPTION_FACTOR_ACTIVITY	3.05182e-23	0.51329	3.86566e-59	0.560768	5.87151e-36	0.62039	2.55375e-53	0.536355	3.66979e-35	0.614735	1.45031e-79	0.633088	2.08473e-11	0.360468	4.78776e-26	0.384487
GO_PROTEIN_POLYUBIQUITINATION	0.223801	0.0676616	0.0032044	0.111334	0.255988	0.0631903	5.4704e-14	0.279261	0.839662	0.0112661	1.23296e-12	0.264291	0.151394	-0.0797591	0.657602	0.0167932
GO_RIBONUCLEOPROTEIN_COMPLEX_LOCALIZATION	0.988219	-0.000822231	0.293369	-0.0397989	0.913874	0.00602239	0.59452	-0.0201674	0.990934	-0.000632745	0.644993	-0.0174563	0.77555	-0.0158759	0.0869495	-0.0647909
GO_REGULATION_OF_MRNA_3_END_PROCESSING	0.000501207	-0.191983	0.71504	-0.0138333	0.00148553	-0.175561	3.28595e-08	-0.207094	9.73997e-06	-0.242597	0.000164121	-0.142075	5.52538e-07	-0.273485	0.00022977	-0.138907
GO_REGULATION_OF_PEPTIDE_TRANSPORT	0.252752	0.0636214	0.826315	-0.00831437	0.0760834	0.0985371	0.115696	-0.0595539	0.0519589	0.107905	0.663628	-0.0164782	0.792993	0.0146123	0.139053	-0.0560097
GO_POSITIVE_REGULATION_OF_ION_TRANSPORT	0.36822	0.0500742	0.00484815	0.106435	0.434039	0.0435413	0.806346	0.00928855	0.446652	0.0423574	0.0799947	0.066264	0.383009	-0.0485486	0.612759	-0.0191765
GO_ATP_BIOSYNTHETIC_PROCESS	0.181331	0.0743288	0.00753568	-0.100994	0.784311	-0.0152403	3.80605e-06	0.173788	0.400278	0.046812	0.030854	0.0816687	0.177691	0.0749516	0.000947652	0.124765
GO_CANONICAL_WNT_SIGNALING_PATHWAY	0.167654	-0.0767193	0.9493	0.00240933	0.117925	-0.0869004	1.28214e-06	-0.181955	0.0137416	-0.136561	0.00736393	-0.101284	7.21076e-06	-0.246026	0.000148297	-0.143016
GO_ACUTE_INFLAMMATORY_RESPONSE	2.15911e-26	0.543664	8.58374e-53	0.534044	1.15438e-32	0.59621	6.89826e-67	0.590406	1.90276e-34	0.609557	2.40413e-102	0.695981	7.62124e-09	0.313523	6.70368e-33	0.430464
GO_NUCLEOBASE_METABOLIC_PROCESS	1.7465e-07	0.284873	1.14081e-14	0.286461	2.88711e-05	0.229761	1.51445e-26	0.388095	0.00079518	0.185174	5.13241e-34	0.43732	0.992187	-0.000545256	1.26318e-05	0.164322
GO_HUMORAL_IMMUNE_RESPONSE	2.82794e-25	0.53324	8.39666e-59	0.559409	6.88606e-36	0.619903	1.13892e-79	0.633415	9.79681e-37	0.625807	2.37129e-109	0.712517	2.93063e-12	0.374497	2.55617e-45	0.499163
GO_NEGATIVE_REGULATION_OF_INTERLEUKIN_10_PRODUCTION	9.22889e-17	0.439237	1.86014e-38	0.463148	9.8681e-21	0.486704	7.48112e-33	0.430168	1.85778e-23	0.515469	9.77376e-46	0.501222	3.28886e-10	0.339502	2.80087e-24	0.371357
GO_PHAGOSOME_MATURATION	1.85905e-07	0.284268	0.000288793	0.136716	4.62746e-10	0.336795	5.40579e-18	0.318957	5.89154e-07	0.272836	6.87253e-16	0.298869	0.0170309	0.132281	0.00038433	0.133931
GO_REGULATION_OF_CELLULAR_RESPONSE_TO_HYPOXIA	0.528995	0.035045	0.000407837	0.133346	0.450187	0.0420291	0.454861	0.0283118	0.260003	-0.0626605	0.00497954	0.106112	0.00094754	-0.182525	0.196086	0.0489558
GO_REGULATION_OF_FEMALE_GONAD_DEVELOPMENT	1.43523e-05	0.238099	0.345686	0.0357197	2.35972e-08	0.303539	0.00276598	0.11303	4.95551e-07	0.274584	0.0252804	0.0846142	0.000763973	0.185774	0.000482233	0.131681
GO_REGULATION_OF_THYMOCYTE_APOPTOTIC_PROCESS	2.84977e-18	0.458172	3.53019e-18	0.320652	6.74085e-23	0.509779	9.23497e-33	0.429599	3.5076e-20	0.480545	6.72727e-38	0.46002	0.000212927	0.204036	1.11107e-10	0.24083
GO_CHROMATIN_MODIFICATION	2.1687e-06	-0.259256	2.15315e-05	-0.159939	1.15186e-05	-0.240661	3.6648e-16	-0.301565	1.69745e-07	-0.285148	1.20133e-14	-0.286227	6.83049e-05	-0.219044	4.9508e-10	-0.232472
GO_MYELOID_LEUKOCYTE_ACTIVATION	1.95122e-26	0.544067	1.29608e-78	0.630104	2.81003e-41	0.655457	1.15154e-68	0.596795	1.1076e-36	0.625439	9.59325e-114	0.72232	4.24845e-12	0.371894	1.94047e-38	0.463045
GO_REACTIVE_NITROGEN_SPECIES_METABOLIC_PROCESS	4.7614e-13	0.386915	0.0951007	0.0631806	1.75028e-11	0.361746	6.0457e-05	0.151109	1.17423e-13	0.396136	5.24707e-05	0.15235	0.000126465	0.211043	0.214198	0.0470389
GO_ANTERIOR_POSTERIOR_PATTERN_SPECIFICATION	0.00857938	-0.145579	0.00830606	-0.0997595	0.000149757	-0.208795	2.09793e-13	-0.272915	0.00375276	-0.160341	2.79246e-10	-0.235713	0.159416	-0.0782302	4.77944e-08	-0.204667
GO_POSITIVE_REGULATION_OF_CELL_DIVISION	1.16949e-08	0.309784	3.43536e-11	0.247183	1.6711e-07	0.285299	2.30847e-25	0.379482	1.03348e-08	0.310869	3.21687e-28	0.399854	0.321768	0.0551321	7.10567e-07	0.186236
GO_EYELID_DEVELOPMENT_IN_CAMERA_TYPE_EYE	1.12445e-06	0.266194	8.52309e-06	0.167484	2.0154e-06	0.26004	1.3424e-05	0.163828	1.63004e-09	0.326578	3.15812e-10	0.23502	0.000499806	0.192023	0.0058529	0.104141
GO_PIGMENT_BIOSYNTHETIC_PROCESS	0.00127263	0.177986	0.265387	0.0421826	1.08654e-05	0.241337	1.48014e-12	0.263383	0.00239748	0.167857	1.86911e-08	0.210693	0.0139496	0.136265	4.28905e-07	0.189821
GO_ERBB_SIGNALING_PATHWAY	0.0266297	-0.122978	4.63328e-05	0.153431	0.103114	-0.0905759	0.000995087	-0.124251	0.00116472	-0.179361	0.699915	0.0146038	1.35334e-05	-0.238786	0.00326796	-0.111106
GO_EMBRYONIC_ORGAN_MORPHOGENESIS	0.00240545	0.167802	2.45743e-05	0.158835	0.0209259	0.128063	0.00394312	0.108903	0.00185437	0.172031	9.35699e-07	0.184252	0.112147	0.0882887	0.0044659	0.107422
GO_REPRODUCTIVE_SYSTEM_DEVELOPMENT	2.05424e-07	0.283299	1.47115e-17	0.31493	1.28983e-08	0.308921	7.5086e-10	0.230084	2.07557e-07	0.283198	4.67909e-20	0.337274	0.698669	0.021554	0.0195286	0.088314
GO_CYTOSOLIC_CALCIUM_ION_TRANSPORT	0.00417359	0.158512	0.0146969	0.0922486	6.04417e-05	0.220598	0.0446482	-0.075974	0.000810283	0.184891	0.891859	0.00515136	0.469829	-0.0402301	0.00135211	-0.120983
GO_REGULATION_OF_SPINDLE_ORGANIZATION	0.000115215	0.212273	0.118173	0.0591528	0.0014131	0.176348	0.0145792	0.0923579	0.00316952	0.163211	0.00700898	0.101905	0.889602	-0.00772934	0.8491	0.00720938
GO_POSITIVE_REGULATION_OF_CATABOLIC_PROCESS	1.28102e-07	0.287852	2.24446e-17	0.313213	1.27075e-10	0.346906	1.92218e-35	0.445861	7.49959e-09	0.313662	1.22074e-40	0.475077	0.465071	0.040662	3.75744e-09	0.220594
GO_PHOSPHOLIPID_SCRAMBLING	6.62539e-14	0.399824	2.0892e-25	0.379802	8.90693e-17	0.439436	2.15072e-22	0.356651	8.998e-20	0.475888	1.29185e-31	0.422372	2.44298e-08	0.303227	6.12622e-17	0.309085
GO_GLIOGENESIS	1.08613e-05	-0.241341	0.284433	-0.0405427	3.96579e-07	-0.276817	9.6521e-10	-0.228632	6.91323e-07	-0.271209	7.35582e-06	-0.168653	0.00428308	-0.158063	0.31533	-0.0380329
GO_PEPTIDYL_THREONINE_MODIFICATION	0.0611197	-0.103994	0.519217	-0.0244193	0.251203	-0.0638291	1.31393e-11	-0.252256	0.00387333	-0.159799	3.61252e-06	-0.174188	4.0828e-06	-0.252381	1.57024e-10	-0.238923
GO_MITOCHONDRIAL_FISSION	0.000525056	-0.191307	2.81219e-23	-0.363638	0.000403928	-0.195088	1.46715e-14	-0.285319	1.97862e-07	-0.283663	1.14418e-21	-0.350777	8.30304e-11	-0.350158	2.71441e-29	-0.407161
GO_MATURATION_OF_5_8S_RRNA_FROM_TRICISTRONIC_RRNA_TRANSCRIPT_SSU_RRNA_5_8S_RRNA_LSU_RRNA_	0.418226	0.045054	9.04278e-05	-0.14753	0.485518	-0.0388229	0.44712	0.0287999	0.146003	0.0808216	0.373626	-0.0337024	0.0815854	0.0967504	0.659354	0.0167015
GO_NEGATIVE_REGULATION_OF_SPROUTING_ANGIOGENESIS	0.0015483	0.174907	0.193275	0.0492648	2.27733e-05	0.232625	7.78951e-07	0.185576	8.95317e-05	0.215565	6.06545e-07	0.187368	0.558365	0.032582	0.400082	0.0318765
GO_POLYOL_TRANSPORT	0.000312428	-0.198725	0.00145765	-0.12017	4.05574e-05	-0.225592	0.117618	-0.0592421	0.000290744	-0.199731	0.00947722	-0.0980659	0.815199	0.0130143	0.000195632	-0.14043
GO_REGULATION_OF_CARDIAC_MUSCLE_CONTRACTION_BY_CALCIUM_ION_SIGNALING	0.00684516	-0.149737	0.0577602	-0.0718064	0.00116342	-0.179378	0.000848827	-0.125916	0.00206694	-0.170279	0.0237311	-0.0855324	0.00293194	-0.164519	0.00499005	-0.106086
GO_ANTIGEN_PROCESSING_AND_PRESENTATION	6.62083e-24	0.519948	1.10804e-34	0.441336	1.82653e-35	0.616902	4.11997e-67	0.591218	5.64976e-30	0.574821	4.45653e-75	0.618715	1.95011e-06	0.260392	3.29011e-19	0.329902
GO_CELLULAR_AMINO_ACID_CATABOLIC_PROCESS	1.39776e-05	-0.238409	0.00331483	-0.11094	3.53404e-06	-0.253967	8.27228e-06	-0.167722	2.39895e-06	-0.258172	2.24638e-06	-0.177792	0.0800293	-0.0972456	0.250957	-0.0434797
GO_TELENCEPHALON_GLIAL_CELL_MIGRATION	5.72534e-14	-0.400758	2.81114e-11	-0.248251	6.02482e-17	-0.441623	1.6016e-19	-0.332646	4.98118e-17	-0.442681	3.20881e-19	-0.329998	9.58739e-10	-0.330931	2.92953e-20	-0.339015
GO_MAINTENANCE_OF_LOCATION	1.17418e-17	0.450604	9.18318e-37	0.453558	9.98286e-26	0.537503	1.34163e-18	0.324462	8.28132e-21	0.487545	3.5077e-40	0.47261	0.000264871	0.201029	3.45244e-12	0.25913
GO_NEPHRON_EPITHELIUM_DEVELOPMENT	0.184204	-0.0738438	0.0280362	-0.0830948	0.00907965	-0.14452	3.13412e-09	-0.221685	0.0814003	-0.0968089	9.50935e-06	-0.16661	0.00453919	-0.157053	0.000208674	-0.139821
GO_NEGATIVE_REGULATION_OF_RECEPTOR_ACTIVITY	0.0156164	0.134024	0.354862	0.0350463	0.0687051	0.101106	0.000175998	0.141422	0.144105	0.0812027	0.000103448	0.146315	0.404574	-0.046387	0.33478	0.0365351
GO_KERATINOCYTE_DIFFERENTIATION	3.06512e-05	0.229032	2.51074e-09	0.22301	1.07613e-05	0.241448	5.90358e-06	0.170384	5.55606e-06	0.24896	2.1096e-11	0.249771	0.0685615	0.101158	0.081367	0.0659653
GO_REGULATION_OF_NITRIC_OXIDE_SYNTHASE_BIOSYNTHETIC_PROCESS	4.1097e-24	0.521996	7.83044e-54	0.538591	2.86241e-36	0.622577	3.06098e-50	0.522583	1.65016e-28	0.562469	4.46873e-77	0.62521	2.69069e-06	0.256934	5.54066e-18	0.318858
GO_POSITIVE_REGULATION_OF_CALCIUM_ION_TRANSMEMBRANE_TRANSPORT	0.0692606	0.100905	0.887659	0.00535274	0.0360543	0.116336	0.854927	0.00692781	0.0397012	0.11416	0.460442	0.0279628	0.433448	-0.0435972	0.53716	-0.02338
GO_NEGATIVE_REGULATION_OF_EPITHELIAL_CELL_MIGRATION	3.95537e-08	0.298848	8.4587e-05	0.148129	5.72866e-11	0.352963	1.42625e-05	0.163334	1.20183e-10	0.347334	1.61659e-07	0.196564	0.00692495	0.149526	0.00610287	0.103626
GO_POSITIVE_REGULATION_OF_SYNAPSE_MATURATION	1.20747e-15	-0.424434	2.78191e-31	-0.420237	1.10538e-20	-0.486158	5.12422e-45	-0.497665	8.18939e-18	-0.452548	4.09786e-51	-0.526554	4.16477e-05	-0.225264	3.21215e-22	-0.355252
GO_PERIPHERAL_NERVOUS_SYSTEM_NEURON_DIFFERENTIATION	0.0734539	0.0994283	0.000523847	0.130851	0.253174	0.063565	2.65412e-07	0.193167	0.0502415	0.108702	1.38107e-08	0.212597	0.355519	0.051415	2.08163e-05	0.160221
GO_CELL_REDOX_HOMEOSTASIS	1.03482e-21	0.497357	8.85687e-31	0.416985	6.86317e-27	0.548194	2.06819e-66	0.588667	5.11092e-24	0.521061	1.36436e-73	0.613786	0.000137222	0.209961	2.60869e-18	0.321849
GO_POSITIVE_REGULATION_OF_SMOOTH_MUSCLE_CONTRACTION	7.98946e-11	0.35045	1.8325e-08	0.210818	1.47063e-08	0.307761	3.20586e-14	0.281739	1.87433e-11	0.361246	5.52107e-19	0.327911	0.256596	0.0631097	9.43661e-05	0.147146
GO_NEGATIVE_REGULATION_OF_GLIAL_CELL_PROLIFERATION	1.07859e-06	0.266627	3.21862e-10	0.234913	1.02924e-08	0.310905	3.97195e-08	0.205869	6.41147e-12	0.368981	1.26745e-14	0.285984	2.74551e-10	0.340923	5.97389e-12	0.256334
GO_POSITIVE_REGULATION_OF_PROTEIN_SECRETION	1.71614e-22	0.505586	1.65314e-43	0.490068	3.15901e-26	0.542145	2.59925e-38	0.462337	2.4205e-28	0.561033	6.42318e-65	0.583157	2.4963e-07	0.281395	1.69753e-23	0.365346
GO_POSITIVE_REGULATION_OF_CYTOSKELETON_ORGANIZATION	2.77362e-10	0.340843	2.67041e-21	0.347751	1.57911e-15	0.422847	1.59955e-11	0.251227	1.53138e-13	0.394409	4.55653e-25	0.377291	0.257282	0.0630189	2.66563e-06	0.176502
GO_REGULATION_OF_STEROID_HORMONE_SECRETION	2.38553e-05	-0.232068	0.00341837	-0.110582	9.5096e-07	-0.267933	0.00315241	-0.111524	2.35624e-06	-0.258366	0.00145869	-0.120162	0.000409951	-0.194877	1.80064e-07	-0.19583
GO_RESPONSE_TO_KETONE	2.0384e-16	0.434752	3.35019e-24	0.370766	1.51423e-21	0.495584	1.09511e-32	0.429137	3.09642e-19	0.46967	2.15702e-49	0.518675	0.00183592	0.172191	1.44704e-11	0.251752
GO_NEGATIVE_REGULATION_OF_PROTEIN_KINASE_B_SIGNALING	0.0120656	0.1391	9.05038e-06	0.167006	0.00165495	0.17385	0.000519262	0.13094	0.0156706	0.133955	3.89241e-05	0.154934	0.883597	-0.00815271	0.175408	0.05131
GO_LYMPHANGIOGENESIS	0.159553	-0.0782045	0.0177885	-0.0896213	0.0722021	-0.0998617	0.00046217	-0.132105	0.0149984	-0.134829	0.00409689	-0.10845	2.27575e-05	-0.232634	4.60777e-09	-0.219361
GO_REGULATION_OF_POSTSYNAPTIC_MEMBRANE_POTENTIAL	6.29065e-14	-0.400156	9.01144e-24	-0.367473	7.36308e-15	-0.413574	1.54541e-41	-0.479848	3.22688e-18	-0.457515	6.68657e-45	-0.49709	1.59058e-09	-0.326781	2.22687e-23	-0.364429
GO_POSITIVE_REGULATION_OF_TOLL_LIKE_RECEPTOR_SIGNALING_PATHWAY	6.30459e-25	0.529915	2.12906e-77	0.626242	5.27208e-38	0.634424	4.53551e-70	0.601745	5.42866e-38	0.634339	1.86565e-102	0.69625	6.15449e-15	0.414669	1.00884e-28	0.403303
GO_SENSORY_PERCEPTION_OF_TASTE	0.524989	0.0353861	2.44481e-07	-0.193734	0.838154	-0.0113735	5.043e-19	-0.32826	0.549216	0.0333422	1.43226e-20	-0.341654	0.283378	0.0596831	0.000538143	-0.13058
GO_FEAR_RESPONSE	1.51578e-09	-0.327178	2.01615e-20	-0.340396	9.69945e-14	-0.397373	4.34807e-26	-0.384791	1.00213e-12	-0.381893	2.07701e-29	-0.407941	7.69201e-08	-0.292682	1.19167e-20	-0.342328
GO_REGULATION_OF_CLATHRIN_MEDIATED_ENDOCYTOSIS	4.09181e-10	-0.337773	2.17687e-16	-0.303777	2.22302e-08	-0.304075	1.02994e-32	-0.429303	3.4047e-15	-0.418256	3.29421e-33	-0.432376	1.78779e-15	-0.42211	1.85517e-26	-0.387462
GO_REGULATION_OF_ENDOTHELIAL_CELL_MIGRATION	2.2056e-09	0.324067	4.15752e-09	0.219984	5.2416e-11	0.353631	8.64198e-06	0.167374	2.17327e-09	0.32419	1.41182e-10	0.239512	0.214157	0.0690896	0.0390426	0.0780783
GO_LABYRINTHINE_LAYER_BLOOD_VESSEL_DEVELOPMENT	0.00346879	0.161684	0.0146442	0.0922975	0.0571716	0.105615	0.38737	0.0327443	4.68142e-06	0.250868	0.000887034	0.125457	0.222494	0.0678526	0.223539	0.0460957
GO_NEURON_NEURON_SYNAPTIC_TRANSMISSION	1.28257e-12	-0.380209	5.43025e-25	-0.376723	1.78007e-15	-0.422136	2.42295e-32	-0.426977	5.28759e-17	-0.44235	4.9401e-36	-0.449324	2.85521e-08	-0.301818	1.07589e-17	-0.316195
GO_INNER_MITOCHONDRIAL_MEMBRANE_ORGANIZATION	0.743478	-0.0182213	0.00978573	-0.0976509	0.207021	-0.070176	1.26395e-05	0.164317	0.767113	0.01649	0.162256	0.0529169	0.0211075	0.127884	0.0328837	0.0807092
GO_CILIUM_MORPHOGENESIS	0.146837	-0.0806551	0.0591854	0.0714025	0.066312	-0.101987	0.0144691	-0.0924609	0.160178	-0.078088	0.437306	-0.0294257	0.0905947	-0.0940244	0.999756	1.16e-05
GO_ENERGY_COUPLED_PROTON_TRANSPORT_DOWN_ELECTROCHEMICAL_GRADIENT	0.961233	0.00270663	4.13104e-05	-0.154422	0.107859	-0.0893556	0.000105962	0.146097	0.963153	-0.00257245	0.317031	0.0378996	0.368768	0.050017	0.0234491	0.085705
GO_POSITIVE_REGULATION_OF_PHOSPHOPROTEIN_PHOSPHATASE_ACTIVITY	1.93157e-07	0.283897	0.0796739	0.0663344	6.90798e-06	0.246511	0.00598519	0.103866	0.000145728	0.209159	0.000212353	0.139655	0.59849	-0.0293157	0.498145	-0.0256638
GO_CELLULAR_MODIFIED_AMINO_ACID_BIOSYNTHETIC_PROCESS	1.5989e-13	0.394127	9.57756e-15	0.287251	4.35836e-14	0.402495	4.62237e-32	0.425208	2.27535e-15	0.420673	5.00388e-31	0.418593	0.000189784	0.205604	9.52623e-17	0.307249
GO_PROTEIN_LOCALIZATION_TO_VACUOLE	0.620707	-0.0275502	0.00265265	0.113509	0.247499	0.0643295	0.122875	-0.0584095	0.351975	-0.0517945	0.844684	0.00742301	9.16059e-05	-0.215268	1.71167e-05	-0.161839
GO_METANEPHRIC_RENAL_VESICLE_MORPHOGENESIS	4.22091e-06	0.252014	0.000125656	0.144543	1.13416e-05	0.240841	0.233	0.0451686	3.75527e-06	0.253301	0.0146529	0.0922893	0.277847	0.060372	0.0935229	-0.0634834
GO_NEGATIVE_REGULATION_OF_RHO_PROTEIN_SIGNAL_TRANSDUCTION	0.392726	0.0475658	0.0249468	-0.0848077	0.694487	0.0218688	2.79449e-06	-0.176145	0.319144	0.0554313	0.000449354	-0.132385	0.0444727	-0.111555	2.1766e-09	-0.22386
GO_CELLULAR_RESPONSE_TO_HYDROGEN_PEROXIDE	0.000216379	0.203816	4.02848e-17	0.310816	1.0083e-06	0.267327	2.36023e-22	0.356327	0.00121715	0.178678	3.81531e-30	0.412833	0.382468	-0.0486039	6.17441e-06	0.170032
GO_REGULATION_OF_ORGAN_GROWTH	0.00411384	0.158761	0.0119025	0.0950815	0.000399694	0.195239	0.408272	-0.031326	0.00037973	0.195969	0.115586	0.0595717	0.851077	0.0104542	0.103538	-0.061626
GO_REGULATION_OF_SYNAPSE_ASSEMBLY	1.17578e-22	-0.507289	3.80432e-28	-0.399352	2.74617e-24	-0.523717	6.99699e-53	-0.534435	2.31761e-29	-0.569717	1.46446e-53	-0.537409	5.81336e-15	-0.415016	1.52824e-25	-0.380803
GO_NEGATIVE_REGULATION_OF_NEUROTRANSMITTER_SECRETION	5.01301e-13	-0.38657	1.1784e-08	-0.213589	5.67912e-11	-0.353029	7.70143e-29	-0.404101	2.31319e-16	-0.43403	1.02021e-26	-0.389323	1.28203e-10	-0.346838	2.18762e-21	-0.348466
GO_POSITIVE_REGULATION_OF_CELL_GROWTH	0.859875	-0.00982996	0.248494	-0.0437062	0.977816	-0.00154846	0.00632721	-0.103179	0.145621	-0.0808979	0.211615	-0.0473049	2.51485e-05	-0.231432	9.08744e-10	-0.228981
GO_NEGATIVE_REGULATION_OF_OXIDOREDUCTASE_ACTIVITY	6.08071e-05	0.220521	3.83619e-13	0.270011	4.61587e-07	0.275298	3.35332e-27	0.392754	1.10363e-05	0.241156	5.34664e-30	0.411865	0.00886237	0.144974	1.04505e-10	0.241167
GO_EMBRYONIC_DIGESTIVE_TRACT_DEVELOPMENT	1.0205e-07	0.290016	0.0855238	0.0650849	6.91497e-07	0.271206	3.19556e-05	0.156619	4.03644e-10	0.337881	2.35934e-06	0.177423	1.70546e-07	0.285103	0.0743132	0.0675466
GO_PROTEIN_O_LINKED_MANNOSYLATION	0.0830149	-0.0963022	7.94177e-05	-0.148693	0.00575502	-0.152864	0.193539	0.0492357	0.0370425	-0.115728	0.572714	-0.0213705	0.0773789	-0.0981072	0.0249651	0.084797
GO_GUANOSINE_CONTAINING_COMPOUND_BIOSYNTHETIC_PROCESS	0.0360932	0.116312	0.0133248	0.0935739	0.196635	0.071807	3.85231e-25	0.377834	0.159682	0.0781806	1.84421e-20	0.340725	0.287825	0.0591356	5.37309e-12	0.256877
GO_BONE_MINERALIZATION	0.000617713	0.188928	1.93999e-11	0.250213	5.21939e-05	0.222447	1.79271e-19	0.332218	0.00132296	0.177381	2.45633e-23	0.364097	0.911592	0.00618263	8.64872e-08	0.200765
GO_REGULATION_OF_TRANSMEMBRANE_RECEPTOR_PROTEIN_SERINE_THREONINE_KINASE_SIGNALING_PATHWAY	0.0346497	0.117224	0.0318184	0.0812063	0.000542308	0.190836	0.84555	0.00738108	0.00508672	0.155055	0.0658639	0.0696107	0.350408	-0.051963	0.273129	-0.0415066
GO_CELLULAR_RESPONSE_TO_ORGANIC_SUBSTANCE	1.87551e-22	0.505184	1.17521e-51	0.528995	1.08907e-32	0.596404	2.81997e-45	0.498952	9.60058e-27	0.546875	1.36116e-74	0.617116	0.000198948	0.204962	2.96246e-17	0.312078
GO_OVULATION_CYCLE_PROCESS	6.77882e-10	0.333737	5.25658e-09	0.218561	2.83193e-12	0.374736	1.60028e-10	0.238819	2.01977e-11	0.3607	2.1407e-17	0.313406	0.294112	0.0583712	0.0122944	0.0946509
GO_POSITIVE_REGULATION_OF_CELL_ADHESION	8.85451e-31	0.581389	1.61212e-70	0.60331	2.28088e-47	0.690578	7.79836e-70	0.600922	1.78343e-44	0.674498	1.70587e-108	0.710555	3.07557e-11	0.357604	3.10346e-32	0.4263
GO_PROTEIN_LOCALIZATION_TO_CHROMATIN	0.174488	-0.0755073	0.820347	-0.00860491	0.0654057	-0.102328	0.0256447	0.0844054	0.237762	-0.0656702	0.124931	0.0580914	0.429667	0.0439563	0.0236771	0.0855653
GO_PROTEIN_O_LINKED_FUCOSYLATION	3.71208e-06	0.253428	0.000427996	0.132868	0.00121769	0.178672	1.67606e-07	0.196318	9.28504e-07	0.26818	4.91133e-10	0.232518	0.0368543	0.115843	2.75289e-06	0.176259
GO_CEREBRAL_CORTEX_DEVELOPMENT	2.86957e-14	-0.405136	1.55275e-15	-0.295331	3.28584e-19	-0.469368	1.7197e-27	-0.394795	1.46584e-20	-0.484795	1.19468e-26	-0.388833	5.45166e-13	-0.386008	1.974e-26	-0.387268
GO_ENDOCRINE_PANCREAS_DEVELOPMENT	0.0399678	0.114007	0.869944	0.00620387	0.28164	0.0598986	0.486104	-0.0263874	0.18861	0.0731105	0.761309	0.0115096	0.87888	0.00848556	0.468582	-0.027458
GO_REGULATION_OF_INTERLEUKIN_8_PRODUCTION	1.23376e-33	0.603558	1.25449e-66	0.58946	7.79505e-50	0.703502	2.88117e-66	0.58814	2.39711e-48	0.695788	1.14196e-105	0.703968	8.05692e-14	0.398569	3.02985e-38	0.461964
GO_RNA_PHOSPHODIESTER_BOND_HYDROLYSIS	0.0956841	0.0925794	0.0971324	0.0627965	0.0618603	0.103699	1.05967e-08	0.21425	0.035926	0.116416	1.08649e-06	0.183166	0.657417	0.0246914	0.0246755	0.0849667
GO_ORGANIC_ACID_METABOLIC_PROCESS	0.00270616	0.165856	0.00689354	0.102112	0.00631673	0.151192	6.99668e-07	0.186347	0.269078	0.0614837	1.5007e-06	0.180796	0.315588	-0.0558396	0.00011464	0.145381
GO_REGULATION_OF_EXCRETION	0.00239814	0.167852	0.146081	-0.0550338	0.00850033	0.145752	0.477075	0.0269364	0.018905	0.130157	0.39905	0.0319463	0.158683	0.0783675	0.475141	0.0270547
GO_AROMATIC_AMINO_ACID_FAMILY_METABOLIC_PROCESS	1.66446e-07	0.285338	2.78371e-07	0.192838	1.34807e-10	0.346452	6.48129e-17	0.308851	3.11292e-13	0.389745	2.75063e-16	0.302786	3.45128e-06	0.254226	9.62845e-12	0.253873
GO_CYCLIC_NUCLEOTIDE_MEDIATED_SIGNALING	3.89904e-12	-0.372498	9.38527e-16	-0.297522	4.91719e-12	-0.370862	5.31295e-35	-0.443243	5.93331e-15	-0.414892	1.17907e-33	-0.435118	5.52833e-10	-0.335374	7.52091e-18	-0.317635
GO_POSITIVE_REGULATION_OF_PHOSPHOLIPID_METABOLIC_PROCESS	6.04049e-07	0.272582	3.13973e-20	0.338758	1.10322e-08	0.310296	4.20854e-13	0.269562	4.73075e-05	0.223678	2.38743e-23	0.364193	0.906352	-0.0065507	4.3079e-05	0.154061
GO_REGULATION_OF_ENDOCRINE_PROCESS	0.0799686	0.0972651	0.249858	0.0435805	0.151828	0.0796749	0.0157706	0.0912854	0.174427	0.0755181	7.30214e-05	0.149441	0.217227	-0.0686302	0.19993	-0.0485385
GO_RESPONSE_TO_INSECTICIDE	0.00043021	-0.194186	6.92322e-21	-0.344309	1.70366e-05	-0.236081	1.73637e-15	-0.294842	3.15993e-08	-0.300897	1.01298e-24	-0.374696	2.80973e-05	-0.23009	1.33661e-14	-0.285743
GO_REGULATION_OF_NUCLEAR_TRANSCRIBED_MRNA_POLY_A_TAIL_SHORTENING	0.0165809	-0.132821	0.408568	-0.0313063	0.30988	-0.056501	9.46565e-07	-0.184168	0.0419436	-0.112904	0.000614314	-0.129241	0.0034877	-0.161591	2.66211e-05	-0.158163
GO_QUATERNARY_AMMONIUM_GROUP_TRANSPORT	0.838942	0.0113174	0.642749	-0.0175749	0.387351	0.0481077	1.25134e-06	-0.182133	0.794143	-0.0145293	0.000405476	-0.133403	0.413924	-0.0454712	0.678822	-0.0156887
GO_EXIT_FROM_MITOSIS	0.0137523	0.136545	9.21429e-13	-0.265731	0.0198945	0.129109	1.92219e-07	-0.195384	0.298729	0.0578169	8.25602e-13	-0.266271	0.253123	-0.0635717	0.0403061	-0.0775827
GO_REGULATION_OF_SYMBIOSIS_ENCOMPASSING_MUTUALISM_THROUGH_PARASITISM	1.30275e-22	0.506828	5.75295e-33	0.430877	4.92551e-31	0.583437	8.37719e-49	0.51593	1.07758e-32	0.596439	5.32748e-59	0.560207	1.2168e-11	0.364386	2.61995e-20	0.339428
GO_RESPONSE_TO_GROWTH_HORMONE	8.88347e-12	0.366651	1.43421e-22	0.358056	1.87087e-15	0.42184	9.90158e-08	0.199864	3.81362e-10	0.338332	2.87547e-21	0.347485	0.395629	0.047275	0.000202608	0.140099
GO_PROTEIN_DEMANNOSYLATION	2.67849e-15	0.419697	2.53334e-28	0.400568	1.70088e-25	0.535329	1.22538e-20	0.342226	1.95855e-17	0.447823	2.08116e-32	0.427392	0.0488463	0.109366	0.00104254	0.12376
GO_G1_DNA_DAMAGE_CHECKPOINT	2.29742e-06	0.258637	5.25896e-06	0.171287	1.49715e-06	0.263194	6.41012e-14	0.278521	6.83993e-07	0.271317	5.99521e-15	0.289357	0.140691	0.0818978	0.00381099	0.109306
GO_POSITIVE_REGULATION_OF_PRI_MIRNA_TRANSCRIPTION_FROM_RNA_POLYMERASE_II_PROMOTER	3.83422e-14	0.403307	4.98987e-21	0.345497	1.83844e-16	0.43534	8.78508e-15	0.287641	8.87761e-18	0.452114	7.11711e-29	0.404333	0.0070948	0.149084	7.23416e-08	0.201948
GO_RESPONSE_TO_OXYGEN_LEVELS	1.77828e-15	0.422142	2.13994e-18	0.32263	4.98323e-21	0.489971	2.27774e-35	0.445425	1.70698e-16	0.435762	1.95595e-44	0.494758	0.0409838	0.113435	9.70793e-12	0.25383
GO_POSITIVE_REGULATION_OF_IMMUNE_SYSTEM_PROCESS	1.01675e-33	0.604184	1.08467e-74	0.617442	4.65242e-54	0.724121	7.24685e-86	0.652063	8.36064e-47	0.687523	3.31096e-126	0.747999	3.10832e-11	0.357526	4.07548e-35	0.443928
GO_PHOTOTRANSDUCTION_VISIBLE_LIGHT	0.262645	-0.062315	0.0701007	-0.0685502	0.0433271	-0.112158	8.59857e-05	-0.147982	0.0577327	-0.105379	0.00156001	-0.119432	0.349225	0.0520905	0.00406318	-0.108548
GO_CELL_COMMUNICATION_INVOLVED_IN_CARDIAC_CONDUCTION	0.903477	-0.00675283	0.46235	-0.0278441	0.956148	-0.00306198	7.55675e-05	-0.149136	0.684795	-0.0226011	0.0120418	-0.094927	0.0635467	-0.103039	0.00015608	-0.142542
GO_PROTEIN_LOCALIZATION_TO_CHROMOSOME_TELOMERIC_REGION	8.67435e-08	-0.291552	1.47585e-14	-0.285293	1.25732e-07	-0.288031	5.99623e-10	-0.231377	2.12948e-11	-0.360312	1.98686e-17	-0.31371	3.43254e-08	-0.300144	3.50185e-17	-0.311392
GO_POSITIVE_REGULATION_OF_CALCIUM_ION_TRANSMEMBRANE_TRANSPORTER_ACTIVITY	0.940721	-0.00414087	0.741276	0.0125099	0.466418	-0.0405395	0.167986	-0.0522052	0.599421	-0.0292411	0.617631	-0.018914	0.603009	-0.0289542	0.800708	-0.00956473
GO_REGULATION_OF_RECEPTOR_MEDIATED_ENDOCYTOSIS	0.152075	0.0796271	6.9805e-07	0.186363	0.00444502	0.157418	0.0829521	0.0656254	0.616433	0.0278877	0.000220622	0.139293	0.000478117	-0.192666	0.261122	-0.0425608
GO_POSITIVE_REGULATION_OF_LYMPHOCYTE_MEDIATED_IMMUNITY	2.55623e-32	0.593552	3.03365e-69	0.598847	9.82476e-48	0.692538	1.54381e-76	0.623476	5.94861e-45	0.67722	1.73398e-109	0.712826	2.96424e-15	0.419089	1.51707e-36	0.452301
GO_POSITIVE_REGULATION_OF_BIOMINERAL_TISSUE_DEVELOPMENT	0.506205	0.0370041	0.00511685	0.105782	0.930939	0.0048258	0.990302	-0.00046059	0.49228	0.0382239	0.0119515	0.0950269	0.0682811	-0.10126	0.755396	-0.011804
GO_RESPONSE_TO_TRANSFORMING_GROWTH_FACTOR_BETA	1.32485e-09	0.328286	5.99403e-26	0.383777	4.06764e-14	0.402933	1.37981e-15	0.295847	6.39028e-10	0.334212	8.09607e-31	0.417239	0.803118	0.0138823	0.000285358	0.136832
GO_N_ACETYLGLUCOSAMINE_METABOLIC_PROCESS	4.94653e-10	0.336263	4.81436e-08	0.20462	2.58305e-11	0.358893	1.71208e-19	0.332393	6.52562e-11	0.351982	2.50378e-19	0.330946	0.00032133	0.19833	7.02868e-10	0.230465
GO_TRANSCRIPTION_ELONGATION_FROM_RNA_POLYMERASE_II_PROMOTER	0.0219232	-0.127094	0.000217409	-0.139432	0.00336629	-0.162193	0.385513	0.0328725	0.0142803	-0.135802	0.420927	-0.0304883	0.356257	-0.0513363	0.324582	-0.0373132
GO_OXIDATIVE_PHOSPHORYLATION	0.585712	-0.0303445	1.44595e-06	-0.18107	0.00801136	-0.146851	0.00137446	0.120806	0.395798	-0.0472582	0.988598	-0.00054148	0.13939	0.0821662	0.184215	0.0502836
GO_APOPTOTIC_NUCLEAR_CHANGES	0.881674	0.00828834	0.232192	-0.0452467	0.762018	-0.0168619	0.0382002	-0.0784163	0.852143	0.0103785	0.00637939	-0.103077	0.300508	-0.0576048	0.344025	0.0358428
GO_REGULATION_OF_RAC_PROTEIN_SIGNAL_TRANSDUCTION	0.528468	-0.0350897	0.29038	-0.0400459	0.688375	0.0223301	7.05423e-09	-0.216763	0.0872006	-0.0950247	3.50763e-05	-0.155825	0.00120611	-0.17882	7.7569e-14	-0.277628
GO_CELLULAR_AMIDE_METABOLIC_PROCESS	0.117388	0.0870273	0.0128136	-0.0940987	0.226602	0.0672552	2.23615e-08	0.209556	0.317247	0.0556487	0.0023969	0.114661	0.760137	0.0169993	0.0248664	0.0848547
GO_PARENTAL_BEHAVIOR	0.0427897	0.112445	0.991036	0.000425719	0.150682	0.0798979	0.14763	-0.0548236	0.0549354	0.106576	0.897407	-0.00488557	0.784264	-0.0152437	0.000274794	-0.137195
GO_REGULATION_OF_DNA_BINDING	0.634279	0.0264852	0.166711	0.052362	0.624941	-0.0272169	0.00165683	0.118773	0.227196	0.0671694	0.00015514	0.142598	0.579707	0.0308315	0.000579899	0.129826
GO_IMMUNOGLOBULIN_PRODUCTION	5.86558e-19	0.466404	3.75145e-37	0.455787	4.29918e-26	0.540909	2.22677e-47	0.509187	2.229e-23	0.514671	4.74755e-57	0.552234	3.32224e-06	0.254643	9.36979e-15	0.28735
GO_REGULATION_OF_TRANSFORMING_GROWTH_FACTOR_BETA_PRODUCTION	1.16343e-15	0.424654	1.0664e-29	0.409875	9.2558e-23	0.508363	1.75181e-30	0.415053	6.19758e-17	0.441465	2.12989e-47	0.50928	0.00754569	0.147956	9.00097e-12	0.254222
GO_TISSUE_MIGRATION	2.00403e-16	0.434849	3.47394e-20	0.338383	7.20668e-20	0.476992	9.94845e-19	0.325628	5.35865e-19	0.466869	2.94567e-30	0.413573	0.0104703	0.141826	6.86766e-07	0.18648
GO_ONE_CARBON_COMPOUND_TRANSPORT	0.00121912	0.178653	0.000993757	0.124265	0.00175363	0.172926	9.60315e-08	0.200068	0.000129114	0.210769	6.31831e-09	0.217438	0.000438436	0.193914	0.00410885	0.108415
GO_LEFT_RIGHT_AXIS_SPECIFICATION	0.223326	-0.067731	0.0552926	0.0725257	0.0657701	-0.102191	0.117846	-0.0592054	0.458678	-0.0412461	0.6967	-0.0147684	0.580425	-0.0307731	0.251732	0.0434087
GO_RESPONSE_TO_ISCHEMIA	0.120658	-0.0862622	0.860614	-0.00665336	0.268276	-0.0615866	0.0462506	-0.0754135	0.168909	-0.076494	0.195183	-0.0490547	2.70211e-06	-0.256888	0.00200159	-0.116684
GO_ENSHEATHMENT_OF_NEURONS	5.61339e-06	-0.248845	0.901934	-0.00466889	0.000676944	-0.187575	2.69815e-07	-0.193054	3.3574e-05	-0.227919	9.25815e-06	-0.166824	0.000336987	-0.19766	0.00517695	-0.10564
GO_POSITIVE_REGULATION_OF_MAST_CELL_ACTIVATION_INVOLVED_IN_IMMUNE_RESPONSE	4.78914e-21	0.49016	1.14576e-63	0.578454	1.51237e-30	0.579507	1.086e-73	0.614118	5.23207e-28	0.558123	1.19336e-99	0.689303	6.69691e-07	0.271533	5.53828e-34	0.437119
GO_POSITIVE_REGULATION_OF_PHOSPHORUS_METABOLIC_PROCESS	6.16129e-14	0.400289	2.51935e-32	0.42687	1.47328e-21	0.495712	3.99123e-19	0.329161	4.62528e-16	0.430043	1.69777e-38	0.463369	0.00763504	0.147739	4.25629e-08	0.205421
GO_CHROMATIN_DISASSEMBLY	0.000117641	-0.211998	1.82748e-07	-0.195729	0.000793208	-0.185211	9.6468e-12	-0.253863	3.23903e-06	-0.254919	6.92878e-14	-0.278157	0.0152467	-0.134502	9.43504e-06	-0.166673
GO_PLATELET_MORPHOGENESIS	4.33815e-23	0.511737	5.81575e-51	0.525866	9.55543e-26	0.537681	6.08997e-24	0.368781	5.38167e-31	0.583128	1.06312e-48	0.515445	7.05037e-11	0.351397	1.17825e-20	0.34237
GO_DENDRITE_MORPHOGENESIS	1.92412e-14	-0.40764	3.03708e-11	-0.24784	3.43206e-14	-0.404008	5.12944e-35	-0.443334	7.07568e-19	-0.465439	1.1763e-31	-0.422631	6.01994e-14	-0.400437	1.62572e-22	-0.357622
GO_RESPONSE_TO_AMPHETAMINE	0.000547666	-0.190693	5.3353e-10	-0.232045	1.85488e-06	-0.260925	3.28099e-05	-0.156394	0.00052966	-0.19118	2.88781e-06	-0.175896	0.0132058	-0.137341	0.00270051	-0.113305
GO_RESPONSE_TO_CAMP	6.5483e-05	0.219581	1.41817e-07	0.197451	1.53331e-05	0.237323	2.59376e-06	0.176709	0.000103117	0.213727	6.41943e-12	0.255965	0.453899	-0.0416857	0.348245	0.0355308
GO_MYOBLAST_DIFFERENTIATION	0.00826439	0.146275	7.2898e-05	0.149456	0.0596247	0.104597	6.57769e-10	0.230846	0.623454	0.0273339	1.14351e-12	0.264664	0.0142359	-0.135864	0.0463198	0.0753897
GO_POSITIVE_REGULATION_OF_ACTIN_NUCLEATION	0.0905212	0.0940457	5.89751e-19	0.327656	0.000186692	0.205826	0.0625895	0.0704695	0.0225352	0.126518	1.54725e-08	0.211884	0.706597	-0.0209591	0.0817831	0.0658756
GO_REGULATION_OF_MEGAKARYOCYTE_DIFFERENTIATION	0.000557651	0.190429	1.024e-11	0.253554	0.0040774	0.158915	3.51472e-25	0.378129	0.000170006	0.207092	3.16952e-27	0.392927	0.2318	0.0665102	2.15023e-16	0.303829
GO_NEGATIVE_REGULATION_OF_HEMOPOIESIS	2.32705e-16	0.433996	9.98882e-54	0.538132	2.60216e-26	0.54292	5.487e-33	0.431004	1.73878e-25	0.535239	2.73533e-61	0.5693	9.23566e-06	0.243207	2.42691e-24	0.37183
GO_REGULATION_OF_MUSCLE_CELL_DIFFERENTIATION	0.00101878	0.18142	2.06388e-12	0.261723	0.000651994	0.188131	0.000492161	0.131477	0.000385684	0.195747	1.49773e-11	0.251572	0.794399	0.0145108	2.92361e-05	0.157373
GO_INNATE_IMMUNE_RESPONSE_IN_MUCOSA	3.02044e-10	0.340173	2.06245e-11	0.24989	2.62656e-10	0.341271	4.41444e-28	0.398905	1.21056e-10	0.347279	4.27435e-29	0.405832	0.000121293	0.211595	2.78105e-16	0.302739
GO_REGULATION_OF_CHEMOKINE_SECRETION	8.22489e-14	0.398436	7.25168e-41	0.476286	8.76383e-17	0.439527	1.75581e-27	0.394731	1.42788e-17	0.449544	6.36432e-50	0.521124	4.5108e-06	0.251279	1.61966e-20	0.341202
GO_RESPONSE_TO_STEROL	0.304678	0.0571109	1.49492e-12	0.263334	0.0214403	0.127559	0.0500043	0.0741619	0.437979	0.0431694	4.77696e-06	0.172034	0.106129	-0.0897955	0.0876895	0.0646398
GO_REGULATION_OF_ENDOPLASMIC_RETICULUM_STRESS_INDUCED_INTRINSIC_APOPTOTIC_SIGNALING_PATHWAY	1.05807e-08	0.310663	1.15402e-20	0.342446	1.60063e-10	0.345127	1.39186e-25	0.381101	1.52996e-07	0.286149	8.42319e-33	0.429848	0.897007	-0.00720786	0.000299633	0.13636
GO_RIBOSOMAL_SMALL_SUBUNIT_BIOGENESIS	0.374712	0.0494	0.0067842	-0.102312	0.802084	0.0139567	0.00575637	0.104345	0.233856	0.0662188	0.323128	0.0374254	0.445238	0.0424892	0.166425	0.0523973
GO_TRABECULA_MORPHOGENESIS	0.242007	0.065081	0.39447	-0.0322575	0.00441405	0.15754	0.0312116	-0.0814958	0.304609	0.0571191	0.495047	-0.025849	0.00132608	-0.177344	0.0637742	-0.0701546
GO_PHOTORECEPTOR_CELL_MAINTENANCE	6.87028e-07	-0.271272	3.55556e-06	-0.17431	1.40133e-08	-0.308189	3.78894e-23	-0.362625	7.72751e-08	-0.292639	8.85484e-21	-0.343413	0.00927598	-0.144118	1.18531e-05	-0.164838
GO_REGULATION_OF_CALCIUM_ION_IMPORT	4.86179e-10	0.336401	3.26216e-09	0.221445	2.82005e-11	0.358245	4.61697e-11	0.2456	3.15766e-10	0.339823	2.97133e-19	0.330292	0.312696	0.0561736	0.00223558	0.115446
GO_HEPARAN_SULFATE_PROTEOGLYCAN_METABOLIC_PROCESS	0.112299	0.0882515	3.06159e-05	0.156982	0.0228196	0.126255	0.401323	0.0317926	0.10624	0.0897671	0.000207423	0.139877	0.262761	-0.0622999	0.191189	0.0494962
GO_INTESTINAL_EPITHELIAL_CELL_DEVELOPMENT	1.11152e-11	0.365039	8.95308e-23	0.359682	1.33199e-13	0.395317	3.64874e-31	0.419479	2.988e-16	0.432563	4.29138e-39	0.466677	0.0993518	0.0915755	0.00103945	0.123791
GO_CELLULAR_RESPONSE_TO_GLUCAGON_STIMULUS	0.815736	-0.0129758	0.26988	-0.0417887	0.993381	0.000461945	0.095905	-0.0630277	0.113137	-0.0880468	0.668753	-0.0162111	0.000542985	-0.190818	0.0083016	-0.0997663
GO_REGULATION_OF_METAL_ION_TRANSPORT	0.107665	0.0894047	0.00393681	0.108922	0.0194307	0.129595	0.535995	0.023447	0.0692145	0.100921	0.0215302	0.0869303	0.563455	-0.0321616	0.662236	0.0165508
GO_POSITIVE_REGULATION_OF_T_HELPER_1_TYPE_IMMUNE_RESPONSE	2.59698e-30	0.577593	5.77908e-57	0.55188	1.52308e-38	0.638004	2.37635e-70	0.602724	6.76485e-41	0.653089	1.61716e-96	0.681309	2.17413e-12	0.376574	3.20662e-30	0.41333
GO_MODIFICATION_BY_SYMBIONT_OF_HOST_MORPHOLOGY_OR_PHYSIOLOGY	1.38744e-12	0.379671	2.24411e-35	0.445463	1.66541e-17	0.448707	3.962e-22	0.354518	1.18394e-08	0.309676	3.74302e-40	0.472458	0.778945	0.0156294	1.1034e-05	0.165416
GO_SISTER_CHROMATID_SEGREGATION	0.868574	0.00921392	0.248678	0.0436892	0.76159	-0.0168932	0.000311069	0.135997	0.765672	-0.0165951	0.00152794	0.119658	0.0890136	-0.0944866	0.611428	-0.0192484
GO_REGULATION_OF_CELL_MIGRATION_INVOLVED_IN_SPROUTING_ANGIOGENESIS	5.77616e-17	0.441858	7.31389e-09	0.216541	2.84474e-20	0.481571	7.40498e-28	0.397349	5.73495e-20	0.478124	2.40969e-29	0.407508	0.000488045	0.192368	6.86527e-07	0.186483
GO_PHASIC_SMOOTH_MUSCLE_CONTRACTION	7.66663e-06	-0.245331	4.21183e-08	-0.205489	2.28556e-07	-0.282258	5.51119e-14	-0.279226	1.97007e-08	-0.305158	1.20937e-15	-0.296421	1.14163e-05	-0.240765	3.99339e-13	-0.269816
GO_AXON_ENSHEATHMENT_IN_CENTRAL_NERVOUS_SYSTEM	2.8005e-05	-0.23013	0.495924	-0.0257965	9.71821e-05	-0.2145	2.9932e-06	-0.175624	5.4145e-06	-0.249248	2.39896e-06	-0.177298	0.0647937	-0.10256	0.308797	-0.0385495
GO_MONOSACCHARIDE_BIOSYNTHETIC_PROCESS	0.00163109	0.174081	0.833067	-0.0079862	0.00152047	0.175194	2.84378e-10	0.23561	0.320613	0.0552636	5.09508e-06	0.171533	0.124337	-0.0854207	0.0219128	0.0866787
GO_ORGANELLE_MEMBRANE_FUSION	0.0571609	-0.10562	0.220002	-0.0464495	0.265285	-0.0619723	0.0232546	-0.0858252	0.0290998	-0.121064	0.02134	-0.0870568	0.00188962	-0.171728	2.22707e-07	-0.194376
GO_REGULATION_OF_ERK1_AND_ERK2_CASCADE	4.42118e-21	0.490539	1.8382e-43	0.489833	1.73617e-26	0.544531	4.94895e-48	0.512297	1.76263e-26	0.544471	2.38066e-73	0.612976	2.2567e-06	0.258829	6.60044e-23	0.360729
GO_REGULATION_OF_T_CELL_MEDIATED_CYTOTOXICITY	1.69668e-26	0.544623	1.15162e-69	0.600328	8.32127e-40	0.646206	1.93118e-75	0.619907	6.46265e-42	0.659372	3.99369e-101	0.69298	1.49762e-15	0.423161	2.41295e-43	0.489229
GO_CARBOHYDRATE_DERIVATIVE_BIOSYNTHETIC_PROCESS	3.55725e-19	0.468963	8.09385e-17	0.307928	1.04976e-24	0.527782	1.7473e-42	0.484801	1.16969e-17	0.450625	1.83982e-46	0.504765	0.144753	0.081072	3.82243e-12	0.258613
GO_NEGATIVE_REGULATION_OF_ACTIN_FILAMENT_BUNDLE_ASSEMBLY	0.000969805	-0.182172	0.202055	-0.0483104	0.0724964	-0.0997592	1.66193e-16	-0.304916	0.000113031	-0.212524	2.58243e-09	-0.222842	8.92327e-07	-0.26859	0.000677062	-0.128249
GO_POSITIVE_REGULATION_OF_CELL_JUNCTION_ASSEMBLY	1.6514e-11	0.36217	4.71734e-18	0.3195	1.09272e-16	0.438286	1.13885e-07	0.198928	3.27637e-16	0.432034	9.54677e-17	0.30724	0.00682305	0.149796	0.019278	0.0884958
GO_NONRIBOSOMAL_PEPTIDE_BIOSYNTHETIC_PROCESS	7.13277e-10	0.333326	1.63993e-07	0.196466	1.61125e-11	0.362349	6.6013e-14	0.278384	2.40283e-14	0.406251	6.02983e-13	0.267811	0.000360948	0.196689	1.22568e-13	0.275472
GO_HEART_MORPHOGENESIS	0.475549	0.0397141	0.0974448	0.062738	0.69049	-0.0221703	0.019705	-0.0881872	0.359115	0.0510324	0.803933	0.0094067	0.233502	-0.0662689	0.351944	-0.0352592
GO_RAS_PROTEIN_SIGNAL_TRANSDUCTION	0.000431799	0.194133	1.14229e-41	0.48054	1.35783e-08	0.308468	2.1592e-16	0.303812	0.000580277	0.189847	1.39101e-37	0.458238	0.530926	-0.034881	1.77913e-08	0.211004
GO_NEGATIVE_REGULATION_OF_DENDRITE_DEVELOPMENT	2.58489e-06	-0.257368	1.75414e-13	-0.273769	9.02035e-09	-0.312057	4.48035e-22	-0.354087	8.89724e-10	-0.331538	2.26978e-19	-0.331321	9.11415e-09	-0.311967	9.7822e-17	-0.307138
GO_REGULATION_OF_HORMONE_SECRETION	0.00256672	-0.166732	8.31354e-10	-0.229496	0.00115221	-0.179527	6.57743e-10	-0.230846	0.00412477	-0.158715	4.41084e-10	-0.233129	0.000195761	-0.205182	1.25911e-08	-0.213175
GO_REGULATION_OF_CALCIUM_ION_TRANSPORT	2.0288e-09	0.324763	2.67097e-13	0.271757	2.35096e-12	0.376032	2.88464e-09	0.222182	4.39626e-09	0.318252	1.12782e-16	0.306544	0.13793	0.0824698	0.00013807	0.143676
GO_SENSORY_PERCEPTION_OF_LIGHT_STIMULUS	0.225027	0.0674833	0.901768	-0.00467682	0.7886	0.0149298	2.2126e-06	-0.177906	0.31592	0.0558012	0.000106847	-0.146022	0.0860601	0.0953678	0.0919941	-0.0637807
GO_TERPENOID_METABOLIC_PROCESS	8.1357e-05	0.216802	0.000611504	0.129288	0.000292925	0.199627	0.000877404	0.125571	1.93453e-06	0.260477	6.01529e-06	0.170237	0.017625	0.131587	1.34485e-05	0.163813
GO_CELL_PROLIFERATION	7.8517e-15	0.413181	5.91053e-38	0.460336	8.7316e-21	0.487291	6.90536e-35	0.442564	3.91443e-16	0.431008	3.43934e-56	0.548648	0.132933	0.0835273	2.78036e-13	0.271564
GO_REGULATION_OF_LIPID_KINASE_ACTIVITY	0.0212756	0.127719	1.72972e-14	0.28457	0.00807032	0.146716	0.0327291	0.0807804	0.20444	0.0705758	2.20819e-07	0.194434	0.0720342	-0.0999202	0.390169	0.0325518
GO_POSITIVE_REGULATION_OF_OSTEOCLAST_DIFFERENTIATION	2.04497e-19	0.471771	7.06432e-42	0.481636	1.71967e-28	0.562315	6.47708e-53	0.534583	6.64063e-22	0.499409	1.96116e-77	0.626356	6.72727e-06	0.246811	8.15947e-18	0.317308
GO_LYSOSOME_LOCALIZATION	6.00701e-06	0.248085	2.51389e-16	0.303168	5.38029e-11	0.353435	3.16906e-11	0.247614	3.31517e-09	0.320647	4.52008e-18	0.31967	0.00131484	0.177477	3.51798e-07	0.19121
GO_VITAMIN_D_METABOLIC_PROCESS	1.23269e-06	0.265235	3.309e-05	0.156322	6.61604e-08	0.294092	9.36351e-10	0.228808	4.37785e-07	0.275829	5.20005e-07	0.188461	0.000168885	0.207181	0.000300019	0.136348
GO_REGULATION_OF_FIBROBLAST_PROLIFERATION	2.99867e-18	0.457903	5.11869e-46	0.502599	9.50058e-30	0.572952	1.76355e-63	0.577743	6.8135e-23	0.509731	1.40263e-84	0.648296	6.22572e-07	0.272275	2.50342e-24	0.371728
GO_CELL_AGGREGATION	0.00610865	-0.151795	0.0705931	0.0684304	2.18567e-05	-0.233118	0.915757	-0.00400811	0.00146231	-0.17581	0.0620255	0.0706211	1.3404e-05	-0.238898	0.262638	0.0424259
GO_RESPONSE_TO_HORMONE	0.000234609	0.202705	6.45263e-09	0.21731	5.29567e-06	0.249496	0.000362825	0.134496	0.000427172	0.194288	4.97199e-10	0.232448	0.0220567	-0.126967	0.590272	0.0204001
GO_REGULATION_OF_SYNCYTIUM_FORMATION_BY_PLASMA_MEMBRANE_FUSION	1.95435e-24	0.525161	1.32004e-46	0.505465	5.86645e-29	0.56631	3.01592e-61	0.569134	7.77372e-31	0.581845	2.46966e-83	0.644598	1.03635e-09	0.330296	3.57748e-29	0.406354
GO_REGULATION_OF_HEXOKINASE_ACTIVITY	0.00199439	0.170857	0.0273164	-0.0834788	0.000314885	0.198615	0.397927	-0.0320224	0.000276486	0.200432	0.240604	-0.0444426	0.000948034	0.182517	0.309094	-0.0385259
GO_POSITIVE_REGULATION_OF_EXTRINSIC_APOPTOTIC_SIGNALING_PATHWAY_IN_ABSENCE_OF_LIGAND	2.16964e-07	0.282766	1.82039e-09	0.224918	1.33075e-06	0.264433	1.30787e-15	0.29608	1.41497e-07	0.2869	5.39237e-20	0.336745	0.00849172	0.145771	6.50951e-10	0.230906
GO_CATECHOLAMINE_BIOSYNTHETIC_PROCESS	0.00739264	0.148332	0.488592	0.0262371	0.0991992	0.0916167	0.00228635	0.115194	0.00887917	0.144938	0.00327993	0.111063	0.458027	0.0413058	0.936409	0.0030231
GO_POSITIVE_REGULATION_OF_MUSCLE_HYPERTROPHY	0.000146008	-0.209134	0.391765	-0.0324424	9.45484e-08	-0.290739	4.8685e-12	-0.257381	3.51481e-09	-0.320152	3.99655e-06	-0.173412	1.91187e-07	-0.283996	4.08717e-08	-0.205684
GO_EMBRYONIC_PATTERN_SPECIFICATION	3.59812e-09	-0.319954	0.00746336	-0.101116	1.94692e-12	-0.377338	2.74865e-16	-0.302789	9.78247e-16	-0.425674	2.56007e-12	-0.26064	1.37884e-10	-0.346278	1.8203e-10	-0.238104
GO_RESPONSE_TO_PROTOZOAN	6.7949e-28	0.55713	3.82135e-71	0.605474	2.58001e-38	0.63649	2.85596e-74	0.61605	1.96296e-42	0.662503	8.52288e-107	0.706618	5.2854e-17	0.442352	3.85587e-49	0.517503
GO_MULTIVESICULAR_BODY_ORGANIZATION	0.00388217	0.15976	0.00149857	-0.119869	0.00103985	0.181106	0.0012543	0.121791	0.000264783	0.201033	0.316746	0.0379219	0.364682	0.0504448	0.805868	-0.00931197
GO_REGULATION_OF_CELL_GROWTH	0.037945	0.115185	0.307852	-0.0386248	0.0241913	0.125024	0.261546	-0.042523	0.325268	0.0547353	0.989837	0.000482671	0.0022388	-0.168979	0.000301875	-0.136288
GO_CENTROSOME_CYCLE	0.93761	-0.00435866	0.955185	0.00212937	0.923148	-0.00537178	0.125617	-0.0579862	0.860787	0.00976534	0.224332	-0.0460169	0.68326	-0.0227174	0.18322	-0.0503977
GO_RESPONSE_TO_FIBROBLAST_GROWTH_FACTOR	0.383921	0.0484557	0.000407192	-0.133361	0.895551	0.00731039	0.15513	-0.0538288	0.300963	-0.0575508	0.239579	-0.0445396	0.00049496	-0.192165	0.00550209	-0.104898
GO_PROTEIN_CARBOXYLATION	4.51932e-14	0.402264	0.000301776	0.136291	8.73696e-14	0.398047	9.20635e-19	0.32593	5.6079e-15	0.415235	2.94561e-17	0.312102	0.000117522	0.212012	1.38197e-06	0.181404
GO_NEGATIVE_REGULATION_OF_TELOMERE_MAINTENANCE_VIA_TELOMERE_LENGTHENING	4.19604e-09	-0.318649	3.52899e-13	-0.270414	4.2711e-10	-0.337433	1.67834e-14	-0.284707	1.71777e-15	-0.422348	7.41786e-20	-0.33555	2.56515e-09	-0.322805	1.03316e-11	-0.253507
GO_DEOXYRIBONUCLEOSIDE_TRIPHOSPHATE_METABOLIC_PROCESS	7.97671e-06	0.24488	0.00014145	0.143453	9.34735e-05	0.215006	5.48589e-32	0.424737	5.59963e-06	0.248872	4.05513e-22	0.354437	0.396019	0.047236	6.66612e-08	0.202488
GO_NUCLEOTIDE_EXCISION_REPAIR_PREINCISION_COMPLEX_ASSEMBLY	0.237966	-0.0656417	0.602184	-0.0197494	0.0607134	-0.104156	0.000433081	0.132751	0.179127	-0.0747048	0.0263526	0.0840068	0.73418	-0.0189072	0.211894	0.0472761
GO_POSITIVE_REGULATION_OF_EXTRACELLULAR_MATRIX_ORGANIZATION	7.13092e-05	0.218494	7.76786e-18	0.317506	8.69568e-06	0.243896	0.19628	0.0489347	2.52212e-06	0.257633	3.00563e-06	0.175592	0.129277	0.0843206	6.59864e-05	0.150338
GO_LEARNING	1.07349e-12	-0.381425	5.50383e-21	-0.345142	1.58868e-13	-0.394169	1.68809e-33	-0.434163	1.33904e-16	-0.437138	9.91057e-35	-0.441626	1.96682e-12	-0.377268	3.80285e-26	-0.385213
GO_CILIUM_ORGANIZATION	0.117321	-0.0870431	0.00989912	0.0975013	0.0566489	-0.105837	0.0229408	-0.0860209	0.166538	-0.0769206	0.653217	-0.0170232	0.228851	-0.0669314	0.844512	0.00743132
GO_REGULATION_OF_PHOSPHOLIPASE_ACTIVITY	2.93303e-10	0.340404	3.25272e-27	0.392848	1.07028e-14	0.411278	2.87649e-19	0.330416	1.23385e-10	0.347132	1.76505e-34	0.440122	0.0681823	0.101296	4.19671e-07	0.189974
[truncated: 2,508 more rows]
